# Supplementary material
Source: ML conference proceedings conference paper supplement (https://proceedings.neurips.cc/paper_files/paper/2021/hash/a5e308070bd6dd3cc56283f2313522de-Abstract.html)
Supplement: Supplementary file 1 [file a5e308070bd6dd3cc56283f2313522de-Supplemental.zip]

Archive with 408 entries (384 files):
- Supplementary Materials/
- __MACOSX/._Supplementary Materials
- Supplementary Materials/.DS_Store
- __MACOSX/Supplementary Materials/._.DS_Store
- Supplementary Materials/Numerical experiments/
- __MACOSX/Supplementary Materials/._Numerical experiments
- Supplementary Materials/Appendix.pdf
- __MACOSX/Supplementary Materials/._Appendix.pdf
- Supplementary Materials/Numerical experiments/.DS_Store
- __MACOSX/Supplementary Materials/Numerical experiments/._.DS_Store
- Supplementary Materials/Numerical experiments/NetScience/
- __MACOSX/Supplementary Materials/Numerical experiments/._NetScience
- Supplementary Materials/Numerical experiments/Simulations/
- __MACOSX/Supplementary Materials/Numerical experiments/._Simulations
- Supplementary Materials/Numerical experiments/Primary School/
- __MACOSX/Supplementary Materials/Numerical experiments/._Primary School
- Supplementary Materials/Numerical experiments/NetScience/.DS_Store
- __MACOSX/Supplementary Materials/Numerical experiments/NetScience/._.DS_Store
- Supplementary Materials/Numerical experiments/NetScience/Precision_Recall_NetScience.png
- __MACOSX/Supplementary Materials/Numerical experiments/NetScience/._Precision_Recall_NetScience.png
- Supplementary Materials/Numerical experiments/NetScience/Code/
- __MACOSX/Supplementary Materials/Numerical experiments/NetScience/._Code
- Supplementary Materials/Numerical experiments/NetScience/RocNetScience.png
- __MACOSX/Supplementary Materials/Numerical experiments/NetScience/._RocNetScience.png
- Supplementary Materials/Numerical experiments/NetScience/Data/
- __MACOSX/Supplementary Materials/Numerical experiments/NetScience/._Data
- Supplementary Materials/Numerical experiments/Simulations/.DS_Store
- __MACOSX/Supplementary Materials/Numerical experiments/Simulations/._.DS_Store
- Supplementary Materials/Numerical experiments/Simulations/Code/
- __MACOSX/Supplementary Materials/Numerical experiments/Simulations/._Code
- Supplementary Materials/Numerical experiments/Simulations/Results/
- __MACOSX/Supplementary Materials/Numerical experiments/Simulations/._Results
- Supplementary Materials/Numerical experiments/Primary School/.DS_Store
- __MACOSX/Supplementary Materials/Numerical experiments/Primary School/._.DS_Store
- Supplementary Materials/Numerical experiments/Primary School/Code/
- __MACOSX/Supplementary Materials/Numerical experiments/Primary School/._Code
- Supplementary Materials/Numerical experiments/Primary School/RocPrimary.png
- __MACOSX/Supplementary Materials/Numerical experiments/Primary School/._RocPrimary.png
- Supplementary Materials/Numerical experiments/Primary School/Precision_Recall_Primary.png
- __MACOSX/Supplementary Materials/Numerical experiments/Primary School/._Precision_Recall_Primary.png
- Supplementary Materials/Numerical experiments/Primary School/Data/
- __MACOSX/Supplementary Materials/Numerical experiments/Primary School/._Data
- Supplementary Materials/Numerical experiments/NetScience/Code/.DS_Store
- __MACOSX/Supplementary Materials/Numerical experiments/NetScience/Code/._.DS_Store
- Supplementary Materials/Numerical experiments/NetScience/Code/NetScience.R
- __MACOSX/Supplementary Materials/Numerical experiments/NetScience/Code/._NetScience.R
- Supplementary Materials/Numerical experiments/NetScience/Data/.DS_Store
- __MACOSX/Supplementary Materials/Numerical experiments/NetScience/Data/._.DS_Store
- Supplementary Materials/Numerical experiments/NetScience/Data/netscience.gml
- __MACOSX/Supplementary Materials/Numerical experiments/NetScience/Data/._netscience.gml
- Supplementary Materials/Numerical experiments/Simulations/Code/Analyse Varying K.R
- __MACOSX/Supplementary Materials/Numerical experiments/Simulations/Code/._Analyse Varying K.R
- Supplementary Materials/Numerical experiments/Simulations/Code/.DS_Store
- __MACOSX/Supplementary Materials/Numerical experiments/Simulations/Code/._.DS_Store
- Supplementary Materials/Numerical experiments/Simulations/Code/Prop_missclassified.R
- __MACOSX/Supplementary Materials/Numerical experiments/Simulations/Code/._Prop_missclassified.R
- Supplementary Materials/Numerical experiments/Simulations/Code/Analyse Missing Observation.R
- __MACOSX/Supplementary Materials/Numerical experiments/Simulations/Code/._Analyse Missing Observation.R
- Supplementary Materials/Numerical experiments/Simulations/Code/Analyse missclassified.R
- __MACOSX/Supplementary Materials/Numerical experiments/Simulations/Code/._Analyse missclassified.R
- Supplementary Materials/Numerical experiments/Simulations/Code/Sparse Analyse.R
- __MACOSX/Supplementary Materials/Numerical experiments/Simulations/Code/._Sparse Analyse.R
- Supplementary Materials/Numerical experiments/Simulations/Code/Missing Observations Analyse.R
- __MACOSX/Supplementary Materials/Numerical experiments/Simulations/Code/._Missing Observations Analyse.R
- Supplementary Materials/Numerical experiments/Simulations/Code/Analyse Fixed K.R
- __MACOSX/Supplementary Materials/Numerical experiments/Simulations/Code/._Analyse Fixed K.R
- Supplementary Materials/Numerical experiments/Simulations/Code/Fixed K.R
- __MACOSX/Supplementary Materials/Numerical experiments/Simulations/Code/._Fixed K.R
- Supplementary Materials/Numerical experiments/Simulations/Code/Sparse.R
- __MACOSX/Supplementary Materials/Numerical experiments/Simulations/Code/._Sparse.R
- Supplementary Materials/Numerical experiments/Simulations/Code/Varying K.R
- __MACOSX/Supplementary Materials/Numerical experiments/Simulations/Code/._Varying K.R
- Supplementary Materials/Numerical experiments/Simulations/Code/Missing Observations.R
- __MACOSX/Supplementary Materials/Numerical experiments/Simulations/Code/._Missing Observations.R
- Supplementary Materials/Numerical experiments/Simulations/Results/Missclassified/
- __MACOSX/Supplementary Materials/Numerical experiments/Simulations/Results/._Missclassified
- Supplementary Materials/Numerical experiments/Simulations/Results/.Rhistory
- __MACOSX/Supplementary Materials/Numerical experiments/Simulations/Results/._.Rhistory
- Supplementary Materials/Numerical experiments/Simulations/Results/Missing Observations/
- __MACOSX/Supplementary Materials/Numerical experiments/Simulations/Results/._Missing Observations
- Supplementary Materials/Numerical experiments/Simulations/Results/Fixed_K_Mixed.png
- __MACOSX/Supplementary Materials/Numerical experiments/Simulations/Results/._Fixed_K_Mixed.png
- Supplementary Materials/Numerical experiments/Simulations/Results/.DS_Store
- __MACOSX/Supplementary Materials/Numerical experiments/Simulations/Results/._.DS_Store
- Supplementary Materials/Numerical experiments/Simulations/Results/Sparse.png
- __MACOSX/Supplementary Materials/Numerical experiments/Simulations/Results/._Sparse.png
- Supplementary Materials/Numerical experiments/Simulations/Results/Varying K/
- __MACOSX/Supplementary Materials/Numerical experiments/Simulations/Results/._Varying K
- Supplementary Materials/Numerical experiments/Simulations/Results/Fixed_K_Assortative.png
- __MACOSX/Supplementary Materials/Numerical experiments/Simulations/Results/._Fixed_K_Assortative.png
- Supplementary Materials/Numerical experiments/Simulations/Results/.RData
- __MACOSX/Supplementary Materials/Numerical experiments/Simulations/Results/._.RData
- Supplementary Materials/Numerical experiments/Simulations/Results/Fixed_K_Disassortative.png
- __MACOSX/Supplementary Materials/Numerical experiments/Simulations/Results/._Fixed_K_Disassortative.png
- Supplementary Materials/Numerical experiments/Simulations/Results/Sparse/
- __MACOSX/Supplementary Materials/Numerical experiments/Simulations/Results/._Sparse
- Supplementary Materials/Numerical experiments/Simulations/Results/Fixed K/
- __MACOSX/Supplementary Materials/Numerical experiments/Simulations/Results/._Fixed K
- Supplementary Materials/Numerical experiments/Simulations/Results/Missing.png
- __MACOSX/Supplementary Materials/Numerical experiments/Simulations/Results/._Missing.png
- Supplementary Materials/Numerical experiments/Primary School/Code/.DS_Store
- __MACOSX/Supplementary Materials/Numerical experiments/Primary School/Code/._.DS_Store
- Supplementary Materials/Numerical experiments/Primary School/Code/PrimarySchool.R
- __MACOSX/Supplementary Materials/Numerical experiments/Primary School/Code/._PrimarySchool.R
- Supplementary Materials/Numerical experiments/Primary School/Data/primary1.GML
- __MACOSX/Supplementary Materials/Numerical experiments/Primary School/Data/._primary1.GML
- Supplementary Materials/Numerical experiments/Primary School/Data/primary2.gml
- __MACOSX/Supplementary Materials/Numerical experiments/Primary School/Data/._primary2.gml
- Supplementary Materials/Numerical experiments/Simulations/Results/Missclassified/.DS_Store
- __MACOSX/Supplementary Materials/Numerical experiments/Simulations/Results/Missclassified/._.DS_Store
- Supplementary Materials/Numerical experiments/Simulations/Results/Missclassified/Mixed SBM/
- __MACOSX/Supplementary Materials/Numerical experiments/Simulations/Results/Missclassified/._Mixed SBM
- Supplementary Materials/Numerical experiments/Simulations/Results/Missclassified/Disassortative SBM/
- __MACOSX/Supplementary Materials/Numerical experiments/Simulations/Results/Missclassified/._Disassortative SBM
- Supplementary Materials/Numerical experiments/Simulations/Results/Missclassified/Assortative SBM/
- __MACOSX/Supplementary Materials/Numerical experiments/Simulations/Results/Missclassified/._Assortative SBM
- Supplementary Materials/Numerical experiments/Simulations/Results/Missing Observations/r_3_av.RDS
- __MACOSX/Supplementary Materials/Numerical experiments/Simulations/Results/Missing Observations/._r_3_av.RDS
- Supplementary Materials/Numerical experiments/Simulations/Results/Missing Observations/r_17.RDS
- __MACOSX/Supplementary Materials/Numerical experiments/Simulations/Results/Missing Observations/._r_17.RDS
- Supplementary Materials/Numerical experiments/Simulations/Results/Missing Observations/r_16.RDS
- __MACOSX/Supplementary Materials/Numerical experiments/Simulations/Results/Missing Observations/._r_16.RDS
- Supplementary Materials/Numerical experiments/Simulations/Results/Missing Observations/r_14.RDS
- __MACOSX/Supplementary Materials/Numerical experiments/Simulations/Results/Missing Observations/._r_14.RDS
- Supplementary Materials/Numerical experiments/Simulations/Results/Missing Observations/r_15.RDS
- __MACOSX/Supplementary Materials/Numerical experiments/Simulations/Results/Missing Observations/._r_15.RDS
- Supplementary Materials/Numerical experiments/Simulations/Results/Missing Observations/r_11.RDS
- __MACOSX/Supplementary Materials/Numerical experiments/Simulations/Results/Missing Observations/._r_11.RDS
- Supplementary Materials/Numerical experiments/Simulations/Results/Missing Observations/r_10.RDS
- __MACOSX/Supplementary Materials/Numerical experiments/Simulations/Results/Missing Observations/._r_10.RDS
- Supplementary Materials/Numerical experiments/Simulations/Results/Missing Observations/r_12.RDS
- __MACOSX/Supplementary Materials/Numerical experiments/Simulations/Results/Missing Observations/._r_12.RDS
- Supplementary Materials/Numerical experiments/Simulations/Results/Missing Observations/r_1_av.RDS
- __MACOSX/Supplementary Materials/Numerical experiments/Simulations/Results/Missing Observations/._r_1_av.RDS
- Supplementary Materials/Numerical experiments/Simulations/Results/Missing Observations/r_13.RDS
- __MACOSX/Supplementary Materials/Numerical experiments/Simulations/Results/Missing Observations/._r_13.RDS
- Supplementary Materials/Numerical experiments/Simulations/Results/Missing Observations/r_4.RDS
- __MACOSX/Supplementary Materials/Numerical experiments/Simulations/Results/Missing Observations/._r_4.RDS
- Supplementary Materials/Numerical experiments/Simulations/Results/Missing Observations/r_5.RDS
- __MACOSX/Supplementary Materials/Numerical experiments/Simulations/Results/Missing Observations/._r_5.RDS
- Supplementary Materials/Numerical experiments/Simulations/Results/Missing Observations/r_11_av.RDS
- __MACOSX/Supplementary Materials/Numerical experiments/Simulations/Results/Missing Observations/._r_11_av.RDS
- Supplementary Materials/Numerical experiments/Simulations/Results/Missing Observations/r_7.RDS
- __MACOSX/Supplementary Materials/Numerical experiments/Simulations/Results/Missing Observations/._r_7.RDS
- Supplementary Materials/Numerical experiments/Simulations/Results/Missing Observations/r_5_av.RDS
- __MACOSX/Supplementary Materials/Numerical experiments/Simulations/Results/Missing Observations/._r_5_av.RDS
- Supplementary Materials/Numerical experiments/Simulations/Results/Missing Observations/r_6.RDS
- __MACOSX/Supplementary Materials/Numerical experiments/Simulations/Results/Missing Observations/._r_6.RDS
- Supplementary Materials/Numerical experiments/Simulations/Results/Missing Observations/r_9_av.RDS
- __MACOSX/Supplementary Materials/Numerical experiments/Simulations/Results/Missing Observations/._r_9_av.RDS
- Supplementary Materials/Numerical experiments/Simulations/Results/Missing Observations/r_13_av.RDS
- __MACOSX/Supplementary Materials/Numerical experiments/Simulations/Results/Missing Observations/._r_13_av.RDS
- Supplementary Materials/Numerical experiments/Simulations/Results/Missing Observations/r_2.RDS
- __MACOSX/Supplementary Materials/Numerical experiments/Simulations/Results/Missing Observations/._r_2.RDS
- Supplementary Materials/Numerical experiments/Simulations/Results/Missing Observations/r_3.RDS
- __MACOSX/Supplementary Materials/Numerical experiments/Simulations/Results/Missing Observations/._r_3.RDS
- Supplementary Materials/Numerical experiments/Simulations/Results/Missing Observations/r_7_av.RDS
- __MACOSX/Supplementary Materials/Numerical experiments/Simulations/Results/Missing Observations/._r_7_av.RDS
- Supplementary Materials/Numerical experiments/Simulations/Results/Missing Observations/r_1.RDS
- __MACOSX/Supplementary Materials/Numerical experiments/Simulations/Results/Missing Observations/._r_1.RDS
- Supplementary Materials/Numerical experiments/Simulations/Results/Missing Observations/r_2_av.RDS
- __MACOSX/Supplementary Materials/Numerical experiments/Simulations/Results/Missing Observations/._r_2_av.RDS
- Supplementary Materials/Numerical experiments/Simulations/Results/Missing Observations/r_14_av.RDS
- __MACOSX/Supplementary Materials/Numerical experiments/Simulations/Results/Missing Observations/._r_14_av.RDS
- Supplementary Materials/Numerical experiments/Simulations/Results/Missing Observations/r_8.RDS
- __MACOSX/Supplementary Materials/Numerical experiments/Simulations/Results/Missing Observations/._r_8.RDS
- Supplementary Materials/Numerical experiments/Simulations/Results/Missing Observations/r_9.RDS
- __MACOSX/Supplementary Materials/Numerical experiments/Simulations/Results/Missing Observations/._r_9.RDS
- Supplementary Materials/Numerical experiments/Simulations/Results/Missing Observations/r_4_av.RDS
- __MACOSX/Supplementary Materials/Numerical experiments/Simulations/Results/Missing Observations/._r_4_av.RDS
- Supplementary Materials/Numerical experiments/Simulations/Results/Missing Observations/r_8_av.RDS
- __MACOSX/Supplementary Materials/Numerical experiments/Simulations/Results/Missing Observations/._r_8_av.RDS
- Supplementary Materials/Numerical experiments/Simulations/Results/Missing Observations/r_10_av.RDS
- __MACOSX/Supplementary Materials/Numerical experiments/Simulations/Results/Missing Observations/._r_10_av.RDS
- Supplementary Materials/Numerical experiments/Simulations/Results/Missing Observations/r_20.RDS
- __MACOSX/Supplementary Materials/Numerical experiments/Simulations/Results/Missing Observations/._r_20.RDS
- Supplementary Materials/Numerical experiments/Simulations/Results/Missing Observations/r_18.RDS
- __MACOSX/Supplementary Materials/Numerical experiments/Simulations/Results/Missing Observations/._r_18.RDS
- Supplementary Materials/Numerical experiments/Simulations/Results/Missing Observations/r_19.RDS
- __MACOSX/Supplementary Materials/Numerical experiments/Simulations/Results/Missing Observations/._r_19.RDS
- Supplementary Materials/Numerical experiments/Simulations/Results/Missing Observations/r_6_av.RDS
- __MACOSX/Supplementary Materials/Numerical experiments/Simulations/Results/Missing Observations/._r_6_av.RDS
- Supplementary Materials/Numerical experiments/Simulations/Results/Missing Observations/r_12_av.RDS
- __MACOSX/Supplementary Materials/Numerical experiments/Simulations/Results/Missing Observations/._r_12_av.RDS
- Supplementary Materials/Numerical experiments/Simulations/Results/Varying K/.DS_Store
- __MACOSX/Supplementary Materials/Numerical experiments/Simulations/Results/Varying K/._.DS_Store
- Supplementary Materials/Numerical experiments/Simulations/Results/Varying K/Disassortative SBM/
- __MACOSX/Supplementary Materials/Numerical experiments/Simulations/Results/Varying K/._Disassortative SBM
- Supplementary Materials/Numerical experiments/Simulations/Results/Varying K/Assortative SBM/
- __MACOSX/Supplementary Materials/Numerical experiments/Simulations/Results/Varying K/._Assortative SBM
- Supplementary Materials/Numerical experiments/Simulations/Results/Sparse/r_14.RDS
- __MACOSX/Supplementary Materials/Numerical experiments/Simulations/Results/Sparse/._r_14.RDS
- Supplementary Materials/Numerical experiments/Simulations/Results/Sparse/r_15.RDS
- __MACOSX/Supplementary Materials/Numerical experiments/Simulations/Results/Sparse/._r_15.RDS
- Supplementary Materials/Numerical experiments/Simulations/Results/Sparse/r_11.RDS
- __MACOSX/Supplementary Materials/Numerical experiments/Simulations/Results/Sparse/._r_11.RDS
- Supplementary Materials/Numerical experiments/Simulations/Results/Sparse/r_10.RDS
- __MACOSX/Supplementary Materials/Numerical experiments/Simulations/Results/Sparse/._r_10.RDS
- Supplementary Materials/Numerical experiments/Simulations/Results/Sparse/r_12.RDS
- __MACOSX/Supplementary Materials/Numerical experiments/Simulations/Results/Sparse/._r_12.RDS
- Supplementary Materials/Numerical experiments/Simulations/Results/Sparse/r_13.RDS
- __MACOSX/Supplementary Materials/Numerical experiments/Simulations/Results/Sparse/._r_13.RDS
- Supplementary Materials/Numerical experiments/Simulations/Results/Sparse/r_4.RDS
- __MACOSX/Supplementary Materials/Numerical experiments/Simulations/Results/Sparse/._r_4.RDS
- Supplementary Materials/Numerical experiments/Simulations/Results/Sparse/r_5.RDS
- __MACOSX/Supplementary Materials/Numerical experiments/Simulations/Results/Sparse/._r_5.RDS
- Supplementary Materials/Numerical experiments/Simulations/Results/Sparse/r_7.RDS
- __MACOSX/Supplementary Materials/Numerical experiments/Simulations/Results/Sparse/._r_7.RDS
- Supplementary Materials/Numerical experiments/Simulations/Results/Sparse/r_6.RDS
- __MACOSX/Supplementary Materials/Numerical experiments/Simulations/Results/Sparse/._r_6.RDS
- Supplementary Materials/Numerical experiments/Simulations/Results/Sparse/r_2.RDS
- __MACOSX/Supplementary Materials/Numerical experiments/Simulations/Results/Sparse/._r_2.RDS
- Supplementary Materials/Numerical experiments/Simulations/Results/Sparse/r_3.RDS
- __MACOSX/Supplementary Materials/Numerical experiments/Simulations/Results/Sparse/._r_3.RDS
- Supplementary Materials/Numerical experiments/Simulations/Results/Sparse/r_1.RDS
- __MACOSX/Supplementary Materials/Numerical experiments/Simulations/Results/Sparse/._r_1.RDS
- Supplementary Materials/Numerical experiments/Simulations/Results/Sparse/r_8.RDS
- __MACOSX/Supplementary Materials/Numerical experiments/Simulations/Results/Sparse/._r_8.RDS
- Supplementary Materials/Numerical experiments/Simulations/Results/Sparse/r_9.RDS
- __MACOSX/Supplementary Materials/Numerical experiments/Simulations/Results/Sparse/._r_9.RDS
- Supplementary Materials/Numerical experiments/Simulations/Results/Fixed K/.DS_Store
- __MACOSX/Supplementary Materials/Numerical experiments/Simulations/Results/Fixed K/._.DS_Store
- Supplementary Materials/Numerical experiments/Simulations/Results/Fixed K/Mixed SBM/
- __MACOSX/Supplementary Materials/Numerical experiments/Simulations/Results/Fixed K/._Mixed SBM
- Supplementary Materials/Numerical experiments/Simulations/Results/Fixed K/Disassortative SBM/
- __MACOSX/Supplementary Materials/Numerical experiments/Simulations/Results/Fixed K/._Disassortative SBM
- Supplementary Materials/Numerical experiments/Simulations/Results/Fixed K/Assortative SBM/
- __MACOSX/Supplementary Materials/Numerical experiments/Simulations/Results/Fixed K/._Assortative SBM
- Supplementary Materials/Numerical experiments/Simulations/Results/Missclassified/Mixed SBM/N_70.RDS
- __MACOSX/Supplementary Materials/Numerical experiments/Simulations/Results/Missclassified/Mixed SBM/._N_70.RDS
- Supplementary Materials/Numerical experiments/Simulations/Results/Missclassified/Mixed SBM/N_189.RDS
- __MACOSX/Supplementary Materials/Numerical experiments/Simulations/Results/Missclassified/Mixed SBM/._N_189.RDS
- Supplementary Materials/Numerical experiments/Simulations/Results/Missclassified/Mixed SBM/N_1000.RDS
- __MACOSX/Supplementary Materials/Numerical experiments/Simulations/Results/Missclassified/Mixed SBM/._N_1000.RDS
- Supplementary Materials/Numerical experiments/Simulations/Results/Missclassified/Mixed SBM/N_264.RDS
- __MACOSX/Supplementary Materials/Numerical experiments/Simulations/Results/Missclassified/Mixed SBM/._N_264.RDS
- Supplementary Materials/Numerical experiments/Simulations/Results/Missclassified/Mixed SBM/N_514.RDS
- __MACOSX/Supplementary Materials/Numerical experiments/Simulations/Results/Missclassified/Mixed SBM/._N_514.RDS
- Supplementary Materials/Numerical experiments/Simulations/Results/Missclassified/Mixed SBM/N_717.RDS
- __MACOSX/Supplementary Materials/Numerical experiments/Simulations/Results/Missclassified/Mixed SBM/._N_717.RDS
- Supplementary Materials/Numerical experiments/Simulations/Results/Missclassified/Mixed SBM/N_136.RDS
- __MACOSX/Supplementary Materials/Numerical experiments/Simulations/Results/Missclassified/Mixed SBM/._N_136.RDS
- Supplementary Materials/Numerical experiments/Simulations/Results/Missclassified/Mixed SBM/N_50.RDS
- __MACOSX/Supplementary Materials/Numerical experiments/Simulations/Results/Missclassified/Mixed SBM/._N_50.RDS
- Supplementary Materials/Numerical experiments/Simulations/Results/Missclassified/Mixed SBM/N_97.RDS
- __MACOSX/Supplementary Materials/Numerical experiments/Simulations/Results/Missclassified/Mixed SBM/._N_97.RDS
- Supplementary Materials/Numerical experiments/Simulations/Results/Missclassified/Mixed SBM/N_368.RDS
- __MACOSX/Supplementary Materials/Numerical experiments/Simulations/Results/Missclassified/Mixed SBM/._N_368.RDS
- Supplementary Materials/Numerical experiments/Simulations/Results/Missclassified/Disassortative SBM/N_70.RDS
- __MACOSX/Supplementary Materials/Numerical experiments/Simulations/Results/Missclassified/Disassortative SBM/._N_70.RDS
- Supplementary Materials/Numerical experiments/Simulations/Results/Missclassified/Disassortative SBM/N_189.RDS
- __MACOSX/Supplementary Materials/Numerical experiments/Simulations/Results/Missclassified/Disassortative SBM/._N_189.RDS
- Supplementary Materials/Numerical experiments/Simulations/Results/Missclassified/Disassortative SBM/N_1000.RDS
- __MACOSX/Supplementary Materials/Numerical experiments/Simulations/Results/Missclassified/Disassortative SBM/._N_1000.RDS
- Supplementary Materials/Numerical experiments/Simulations/Results/Missclassified/Disassortative SBM/N_264.RDS
- __MACOSX/Supplementary Materials/Numerical experiments/Simulations/Results/Missclassified/Disassortative SBM/._N_264.RDS
- Supplementary Materials/Numerical experiments/Simulations/Results/Missclassified/Disassortative SBM/N_514.RDS
- __MACOSX/Supplementary Materials/Numerical experiments/Simulations/Results/Missclassified/Disassortative SBM/._N_514.RDS
- Supplementary Materials/Numerical experiments/Simulations/Results/Missclassified/Disassortative SBM/N_717.RDS
- __MACOSX/Supplementary Materials/Numerical experiments/Simulations/Results/Missclassified/Disassortative SBM/._N_717.RDS
- Supplementary Materials/Numerical experiments/Simulations/Results/Missclassified/Disassortative SBM/N_136.RDS
- __MACOSX/Supplementary Materials/Numerical experiments/Simulations/Results/Missclassified/Disassortative SBM/._N_136.RDS
- Supplementary Materials/Numerical experiments/Simulations/Results/Missclassified/Disassortative SBM/N_50.RDS
- __MACOSX/Supplementary Materials/Numerical experiments/Simulations/Results/Missclassified/Disassortative SBM/._N_50.RDS
- Supplementary Materials/Numerical experiments/Simulations/Results/Missclassified/Disassortative SBM/N_97.RDS
- __MACOSX/Supplementary Materials/Numerical experiments/Simulations/Results/Missclassified/Disassortative SBM/._N_97.RDS
- Supplementary Materials/Numerical experiments/Simulations/Results/Missclassified/Disassortative SBM/N_368.RDS
- __MACOSX/Supplementary Materials/Numerical experiments/Simulations/Results/Missclassified/Disassortative SBM/._N_368.RDS
- Supplementary Materials/Numerical experiments/Simulations/Results/Missclassified/Assortative SBM/N_70.RDS
- __MACOSX/Supplementary Materials/Numerical experiments/Simulations/Results/Missclassified/Assortative SBM/._N_70.RDS
- Supplementary Materials/Numerical experiments/Simulations/Results/Missclassified/Assortative SBM/N_189.RDS
- __MACOSX/Supplementary Materials/Numerical experiments/Simulations/Results/Missclassified/Assortative SBM/._N_189.RDS
- Supplementary Materials/Numerical experiments/Simulations/Results/Missclassified/Assortative SBM/.DS_Store
- __MACOSX/Supplementary Materials/Numerical experiments/Simulations/Results/Missclassified/Assortative SBM/._.DS_Store
- Supplementary Materials/Numerical experiments/Simulations/Results/Missclassified/Assortative SBM/N_1000.RDS
- __MACOSX/Supplementary Materials/Numerical experiments/Simulations/Results/Missclassified/Assortative SBM/._N_1000.RDS
- Supplementary Materials/Numerical experiments/Simulations/Results/Missclassified/Assortative SBM/N_264.RDS
- __MACOSX/Supplementary Materials/Numerical experiments/Simulations/Results/Missclassified/Assortative SBM/._N_264.RDS
- Supplementary Materials/Numerical experiments/Simulations/Results/Missclassified/Assortative SBM/N_514.RDS
- __MACOSX/Supplementary Materials/Numerical experiments/Simulations/Results/Missclassified/Assortative SBM/._N_514.RDS
- Supplementary Materials/Numerical experiments/Simulations/Results/Missclassified/Assortative SBM/N_717.RDS
- __MACOSX/Supplementary Materials/Numerical experiments/Simulations/Results/Missclassified/Assortative SBM/._N_717.RDS
- Supplementary Materials/Numerical experiments/Simulations/Results/Missclassified/Assortative SBM/N_136.RDS
- __MACOSX/Supplementary Materials/Numerical experiments/Simulations/Results/Missclassified/Assortative SBM/._N_136.RDS
- Supplementary Materials/Numerical experiments/Simulations/Results/Missclassified/Assortative SBM/N_50.RDS
- __MACOSX/Supplementary Materials/Numerical experiments/Simulations/Results/Missclassified/Assortative SBM/._N_50.RDS
- Supplementary Materials/Numerical experiments/Simulations/Results/Missclassified/Assortative SBM/N_97.RDS
- __MACOSX/Supplementary Materials/Numerical experiments/Simulations/Results/Missclassified/Assortative SBM/._N_97.RDS
- Supplementary Materials/Numerical experiments/Simulations/Results/Missclassified/Assortative SBM/N_368.RDS
- __MACOSX/Supplementary Materials/Numerical experiments/Simulations/Results/Missclassified/Assortative SBM/._N_368.RDS
- Supplementary Materials/Numerical experiments/Simulations/Results/Varying K/Disassortative SBM/K_6.RDS
- __MACOSX/Supplementary Materials/Numerical experiments/Simulations/Results/Varying K/Disassortative SBM/._K_6.RDS
- Supplementary Materials/Numerical experiments/Simulations/Results/Varying K/Disassortative SBM/K_7.RDS
- __MACOSX/Supplementary Materials/Numerical experiments/Simulations/Results/Varying K/Disassortative SBM/._K_7.RDS
- Supplementary Materials/Numerical experiments/Simulations/Results/Varying K/Disassortative SBM/K_5.RDS
- __MACOSX/Supplementary Materials/Numerical experiments/Simulations/Results/Varying K/Disassortative SBM/._K_5.RDS
- Supplementary Materials/Numerical experiments/Simulations/Results/Varying K/Disassortative SBM/K_4.RDS
- __MACOSX/Supplementary Materials/Numerical experiments/Simulations/Results/Varying K/Disassortative SBM/._K_4.RDS
- Supplementary Materials/Numerical experiments/Simulations/Results/Varying K/Disassortative SBM/K_3.RDS
- __MACOSX/Supplementary Materials/Numerical experiments/Simulations/Results/Varying K/Disassortative SBM/._K_3.RDS
[truncated: 108 more entries]
