# Supplementary material
Source: ML conference proceedings conference paper supplement (https://proceedings.neurips.cc/paper_files/paper/2021/hash/a5e308070bd6dd3cc56283f2313522de-Abstract.html)
Supplement: Supplementary file 1 [file a5e308070bd6dd3cc56283f2313522de-Supplemental.zip › Supplementary Materials/Numerical experiments/NetScience/Data/netscience.gml]

Creator "Mark Newman on Sat Jul 22 06:24:59 2006"
graph
[
  directed 0
  node
  [
    id 0
    label "ABRAMSON, G"
  ]
  node
  [
    id 1
    label "KUPERMAN, M"
  ]
  node
  [
    id 2
    label "ACEBRON, J"
  ]
  node
  [
    id 3
    label "BONILLA, L"
  ]
  node
  [
    id 4
    label "PEREZVICENTE, C"
  ]
  node
  [
    id 5
    label "RITORT, F"
  ]
  node
  [
    id 6
    label "SPIGLER, R"
  ]
  node
  [
    id 7
    label "ADAMIC, L"
  ]
  node
  [
    id 8
    label "ADAR, E"
  ]
  node
  [
    id 9
    label "HUBERMAN, B"
  ]
  node
  [
    id 10
    label "LUKOSE, R"
  ]
  node
  [
    id 11
    label "PUNIYANI, A"
  ]
  node
  [
    id 12
    label "AERTSEN, A"
  ]
  node
  [
    id 13
    label "GERSTEIN, G"
  ]
  node
  [
    id 14
    label "HABIB, M"
  ]
  node
  [
    id 15
    label "PALM, G"
  ]
  node
  [
    id 16
    label "AFRAIMOVICH, V"
  ]
  node
  [
    id 17
    label "VERICHEV, N"
  ]
  node
  [
    id 18
    label "RABINOVICH, M"
  ]
  node
  [
    id 19
    label "AGRAWAL, H"
  ]
  node
  [
    id 20
    label "AHUJA, R"
  ]
  node
  [
    id 21
    label "MAGNANTI, T"
  ]
  node
  [
    id 22
    label "ORLIN, J"
  ]
  node
  [
    id 23
    label "AIELLO, W"
  ]
  node
  [
    id 24
    label "CHUNG, F"
  ]
  node
  [
    id 25
    label "LU, L"
  ]
  node
  [
    id 26
    label "ALBA, R"
  ]
  node
  [
    id 27
    label "ALBERICH, R"
  ]
  node
  [
    id 28
    label "MIROJULIA, J"
  ]
  node
  [
    id 29
    label "ROSSELLO, F"
  ]
  node
  [
    id 30
    label "ALBERT, R"
  ]
  node
  [
    id 31
    label "ALBERT, I"
  ]
  node
  [
    id 32
    label "NAKARADO, G"
  ]
  node
  [
    id 33
    label "BARABASI, A"
  ]
  node
  [
    id 34
    label "JEONG, H"
  ]
  node
  [
    id 35
    label "ALBERTS, B"
  ]
  node
  [
    id 36
    label "BRAY, D"
  ]
  node
  [
    id 37
    label "LEWIS, J"
  ]
  node
  [
    id 38
    label "RAFF, M"
  ]
  node
  [
    id 39
    label "ROBERTS, K"
  ]
  node
  [
    id 40
    label "WATSON, J"
  ]
  node
  [
    id 41
    label "ALDANA, M"
  ]
  node
  [
    id 42
    label "ALDOUS, D"
  ]
  node
  [
    id 43
    label "PITTEL, B"
  ]
  node
  [
    id 44
    label "ALEKSIEJUK, A"
  ]
  node
  [
    id 45
    label "HOLYST, J"
  ]
  node
  [
    id 46
    label "STAUFFER, D"
  ]
  node
  [
    id 47
    label "ALLARIA, E"
  ]
  node
  [
    id 48
    label "ARECCHI, F"
  ]
  node
  [
    id 49
    label "DIGARBO, A"
  ]
  node
  [
    id 50
    label "MEUCCI, R"
  ]
  node
  [
    id 51
    label "ALMAAS, E"
  ]
  node
  [
    id 52
    label "KOVACS, B"
  ]
  node
  [
    id 53
    label "VICSEK, T"
  ]
  node
  [
    id 54
    label "OLTVAI, Z"
  ]
  node
  [
    id 55
    label "KRAPIVSKY, P"
  ]
  node
  [
    id 56
    label "REDNER, S"
  ]
  node
  [
    id 57
    label "KULKARNI, R"
  ]
  node
  [
    id 58
    label "STROUD, D"
  ]
  node
  [
    id 59
    label "ALON, N"
  ]
  node
  [
    id 60
    label "YUSTER, R"
  ]
  node
  [
    id 61
    label "ZWICK, U"
  ]
  node
  [
    id 62
    label "ALON, U"
  ]
  node
  [
    id 63
    label "SURETTE, M"
  ]
  node
  [
    id 64
    label "BARKAI, N"
  ]
  node
  [
    id 65
    label "LEIBER, S"
  ]
  node
  [
    id 66
    label "ALTER, O"
  ]
  node
  [
    id 67
    label "BROWN, P"
  ]
  node
  [
    id 68
    label "BOTSTEIN, D"
  ]
  node
  [
    id 69
    label "AMARAL, L"
  ]
  node
  [
    id 70
    label "SCALA, A"
  ]
  node
  [
    id 71
    label "BARTHELEMY, M"
  ]
  node
  [
    id 72
    label "STANLEY, H"
  ]
  node
  [
    id 73
    label "AMENGUAL, A"
  ]
  node
  [
    id 74
    label "HERNANDEZGARCIA, E"
  ]
  node
  [
    id 75
    label "MONTAGNE, R"
  ]
  node
  [
    id 76
    label "SANMIGUEL, M"
  ]
  node
  [
    id 77
    label "ANCELMEYERS, L"
  ]
  node
  [
    id 78
    label "NEWMAN, M"
  ]
  node
  [
    id 79
    label "MARTIN, M"
  ]
  node
  [
    id 80
    label "SCHRAG, S"
  ]
  node
  [
    id 81
    label "ANDERSON, C"
  ]
  node
  [
    id 82
    label "WASSERMAN, S"
  ]
  node
  [
    id 83
    label "CROUCH, B"
  ]
  node
  [
    id 84
    label "ANDERSON, P"
  ]
  node
  [
    id 85
    label "ARROW, K"
  ]
  node
  [
    id 86
    label "PINES, D"
  ]
  node
  [
    id 87
    label "ANDERSON, R"
  ]
  node
  [
    id 88
    label "MAY, R"
  ]
  node
  [
    id 89
    label "ANDERSSON, H"
  ]
  node
  [
    id 90
    label "ANTAL, T"
  ]
  node
  [
    id 91
    label "APIC, G"
  ]
  node
  [
    id 92
    label "GOUGH, J"
  ]
  node
  [
    id 93
    label "TEICHMANN, S"
  ]
  node
  [
    id 94
    label "ARENAS, A"
  ]
  node
  [
    id 95
    label "CABRALES, A"
  ]
  node
  [
    id 96
    label "DIAZGUILERA, A"
  ]
  node
  [
    id 97
    label "GUIMERA, R"
  ]
  node
  [
    id 98
    label "VEGAREDONDO, F"
  ]
  node
  [
    id 99
    label "DANON, L"
  ]
  node
  [
    id 100
    label "GLEISER, P"
  ]
  node
  [
    id 101
    label "ARITA, M"
  ]
  node
  [
    id 102
    label "ASHWIN, P"
  ]
  node
  [
    id 103
    label "BUESCU, J"
  ]
  node
  [
    id 104
    label "STEWART, I"
  ]
  node
  [
    id 105
    label "ATAY, F"
  ]
  node
  [
    id 106
    label "JOST, J"
  ]
  node
  [
    id 107
    label "WENDE, A"
  ]
  node
  [
    id 108
    label "AUMANN, R"
  ]
  node
  [
    id 109
    label "HART, S"
  ]
  node
  [
    id 110
    label "AXELROD, R"
  ]
  node
  [
    id 111
    label "BADER, G"
  ]
  node
  [
    id 112
    label "HOGUE, C"
  ]
  node
  [
    id 113
    label "BAIESI, M"
  ]
  node
  [
    id 114
    label "PACZUSKI, M"
  ]
  node
  [
    id 115
    label "BAILEY, N"
  ]
  node
  [
    id 116
    label "BAIRD, D"
  ]
  node
  [
    id 117
    label "ULANOWICZ, R"
  ]
  node
  [
    id 118
    label "BAKER, W"
  ]
  node
  [
    id 119
    label "FAULKNER, R"
  ]
  node
  [
    id 120
    label "BAK, P"
  ]
  node
  [
    id 121
    label "SNEPPEN, K"
  ]
  node
  [
    id 122
    label "BALL, F"
  ]
  node
  [
    id 123
    label "MOLLISON, D"
  ]
  node
  [
    id 124
    label "SCALIATOMBA, G"
  ]
  node
  [
    id 125
    label "BALL, P"
  ]
  node
  [
    id 126
    label "BANAVAR, J"
  ]
  node
  [
    id 127
    label "MARITAN, A"
  ]
  node
  [
    id 128
    label "RINALDO, A"
  ]
  node
  [
    id 129
    label "BANKS, D"
  ]
  node
  [
    id 130
    label "CARLEY, K"
  ]
  node
  [
    id 131
    label "BIANCONI, G"
  ]
  node
  [
    id 132
    label "RAVASZ, E"
  ]
  node
  [
    id 133
    label "NEDA, Z"
  ]
  node
  [
    id 134
    label "SCHUBERT, A"
  ]
  node
  [
    id 135
    label "BARAHONA, M"
  ]
  node
  [
    id 136
    label "PECORA, L"
  ]
  node
  [
    id 137
    label "BARBOUR, A"
  ]
  node
  [
    id 138
    label "REINERT, G"
  ]
  node
  [
    id 139
    label "BARJOSEPH, Z"
  ]
  node
  [
    id 140
    label "GERBER, G"
  ]
  node
  [
    id 141
    label "LEE, T"
  ]
  node
  [
    id 142
    label "RINALDI, N"
  ]
  node
  [
    id 143
    label "YOO, J"
  ]
  node
  [
    id 144
    label "ROBERT, F"
  ]
  node
  [
    id 145
    label "GORDON, D"
  ]
  node
  [
    id 146
    label "FRAENKEL, E"
  ]
  node
  [
    id 147
    label "JAAKKOLA, T"
  ]
  node
  [
    id 148
    label "YOUNG, R"
  ]
  node
  [
    id 149
    label "BARRAT, A"
  ]
  node
  [
    id 150
    label "PASTORSATORRAS, R"
  ]
  node
  [
    id 151
    label "VESPIGNANI, A"
  ]
  node
  [
    id 152
    label "WEIGT, M"
  ]
  node
  [
    id 153
    label "BARRETO, E"
  ]
  node
  [
    id 154
    label "SO, P"
  ]
  node
  [
    id 155
    label "GLUCKMANN, B"
  ]
  node
  [
    id 156
    label "SCHIFF, S"
  ]
  node
  [
    id 157
    label "GONDRAN, B"
  ]
  node
  [
    id 158
    label "GUICHARD, E"
  ]
  node
  [
    id 159
    label "BARYAM, Y"
  ]
  node
  [
    id 160
    label "BATAGELJ, V"
  ]
  node
  [
    id 161
    label "MRVAR, A"
  ]
  node
  [
    id 162
    label "BATTISTON, S"
  ]
  node
  [
    id 163
    label "CATANZARO, M"
  ]
  node
  [
    id 164
    label "BATTY, M"
  ]
  node
  [
    id 165
    label "LONGLEY, P"
  ]
  node
  [
    id 166
    label "BAUER, M"
  ]
  node
  [
    id 167
    label "BERNARD, D"
  ]
  node
  [
    id 168
    label "BAVELAS, A"
  ]
  node
  [
    id 169
    label "BCHKLOVSKII, D"
  ]
  node
  [
    id 170
    label "SCHIKORSKI, T"
  ]
  node
  [
    id 171
    label "STEVENS, C"
  ]
  node
  [
    id 172
    label "BEARMAN, P"
  ]
  node
  [
    id 173
    label "MOODY, J"
  ]
  node
  [
    id 174
    label "STOVEL, K"
  ]
  node
  [
    id 175
    label "BEKESSY, A"
  ]
  node
  [
    id 176
    label "BEKESSY, P"
  ]
  node
  [
    id 177
    label "KOMLOS, J"
  ]
  node
  [
    id 178
    label "BELL, H"
  ]
  node
  [
    id 179
    label "BELYKH, I"
  ]
  node
  [
    id 180
    label "BELYKH, V"
  ]
  node
  [
    id 181
    label "HASLER, M"
  ]
  node
  [
    id 182
    label "BENDER, E"
  ]
  node
  [
    id 183
    label "CANFIELD, E"
  ]
  node
  [
    id 184
    label "BENNAIM, E"
  ]
  node
  [
    id 185
    label "FRAUENFELDER, H"
  ]
  node
  [
    id 186
    label "TOROCZKAI, Z"
  ]
  node
  [
    id 187
    label "BERG, J"
  ]
  node
  [
    id 188
    label "LASSIG, M"
  ]
  node
  [
    id 189
    label "WAGNER, A"
  ]
  node
  [
    id 190
    label "BERLOW, E"
  ]
  node
  [
    id 191
    label "BERNARDES, A"
  ]
  node
  [
    id 192
    label "COSTA, U"
  ]
  node
  [
    id 193
    label "ARAUJO, A"
  ]
  node
  [
    id 194
    label "KERTESZ, J"
  ]
  node
  [
    id 195
    label "BERNARD, H"
  ]
  node
  [
    id 196
    label "KILLWORTH, P"
  ]
  node
  [
    id 197
    label "EVANS, M"
  ]
  node
  [
    id 198
    label "MCCARTY, C"
  ]
  node
  [
    id 199
    label "SHELLEY, G"
  ]
  node
  [
    id 200
    label "BHAN, A"
  ]
  node
  [
    id 201
    label "GALAS, D"
  ]
  node
  [
    id 202
    label "DEWEY, T"
  ]
  node
  [
    id 203
    label "CAPOCCI, A"
  ]
  node
  [
    id 204
    label "BIGGS, N"
  ]
  node
  [
    id 205
    label "BILKE, S"
  ]
  node
  [
    id 206
    label "PETERSON, C"
  ]
  node
  [
    id 207
    label "BLANCHARD, P"
  ]
  node
  [
    id 208
    label "CHANG, C"
  ]
  node
  [
    id 209
    label "KRUGER, T"
  ]
  node
  [
    id 210
    label "BLASIUS, B"
  ]
  node
  [
    id 211
    label "HUPPERT, A"
  ]
  node
  [
    id 212
    label "STONE, L"
  ]
  node
  [
    id 213
    label "BLOWER, S"
  ]
  node
  [
    id 214
    label "SAMUEL, M"
  ]
  node
  [
    id 215
    label "WILEY, J"
  ]
  node
  [
    id 216
    label "BOCCALETTI, S"
  ]
  node
  [
    id 217
    label "BRAGARD, J"
  ]
  node
  [
    id 218
    label "MANCINI, H"
  ]
  node
  [
    id 219
    label "KURTHS, J"
  ]
  node
  [
    id 220
    label "VALLADARES, D"
  ]
  node
  [
    id 221
    label "OSIPOV, G"
  ]
  node
  [
    id 222
    label "ZHOU, C"
  ]
  node
  [
    id 223
    label "PELAEZ, A"
  ]
  node
  [
    id 224
    label "MAZA, D"
  ]
  node
  [
    id 225
    label "BOGUNA, M"
  ]
  node
  [
    id 226
    label "BOHLAND, J"
  ]
  node
  [
    id 227
    label "MINAI, A"
  ]
  node
  [
    id 228
    label "BOLLOBAS, B"
  ]
  node
  [
    id 229
    label "RIORDAN, O"
  ]
  node
  [
    id 230
    label "SPENCER, J"
  ]
  node
  [
    id 231
    label "TUSNADY, G"
  ]
  node
  [
    id 232
    label "BONACICH, P"
  ]
  node
  [
    id 233
    label "BONANNO, G"
  ]
  node
  [
    id 234
    label "LILLO, F"
  ]
  node
  [
    id 235
    label "MANTEGNA, R"
  ]
  node
  [
    id 236
    label "BONNEKOH, J"
  ]
  node
  [
    id 237
    label "BORDENS, M"
  ]
  node
  [
    id 238
    label "GOMEZ, I"
  ]
  node
  [
    id 239
    label "BORGATTI, S"
  ]
  node
  [
    id 240
    label "EVERETT, M"
  ]
  node
  [
    id 241
    label "FOSTER, P"
  ]
  node
  [
    id 242
    label "BORGERS, C"
  ]
  node
  [
    id 243
    label "KOPELL, N"
  ]
  node
  [
    id 244
    label "BORNHOLDT, S"
  ]
  node
  [
    id 245
    label "EBEL, H"
  ]
  node
  [
    id 246
    label "ROHLF, T"
  ]
  node
  [
    id 247
    label "SCHUSTER, H"
  ]
  node
  [
    id 248
    label "BOTA, M"
  ]
  node
  [
    id 249
    label "DONG, H"
  ]
  node
  [
    id 250
    label "SWANSON, L"
  ]
  node
  [
    id 251
    label "MENDOZA, C"
  ]
  node
  [
    id 252
    label "HENTSCHEL, H"
  ]
  node
  [
    id 253
    label "BRANDES, U"
  ]
  node
  [
    id 254
    label "BREIGER, R"
  ]
  node
  [
    id 255
    label "BOORMAN, S"
  ]
  node
  [
    id 256
    label "ARABIE, P"
  ]
  node
  [
    id 257
    label "BRESSLER, S"
  ]
  node
  [
    id 258
    label "BRIN, S"
  ]
  node
  [
    id 259
    label "PAGE, L"
  ]
  node
  [
    id 260
    label "BROADBENT, S"
  ]
  node
  [
    id 261
    label "HAMMERSLEY, J"
  ]
  node
  [
    id 262
    label "BRODER, A"
  ]
  node
  [
    id 263
    label "KUMAR, R"
  ]
  node
  [
    id 264
    label "MAGHOUL, F"
  ]
  node
  [
    id 265
    label "RAGHAVAN, P"
  ]
  node
  [
    id 266
    label "RAJAGOPALAN, S"
  ]
  node
  [
    id 267
    label "STATA, R"
  ]
  node
  [
    id 268
    label "TOMKINS, A"
  ]
  node
  [
    id 269
    label "WIENER, J"
  ]
  node
  [
    id 270
    label "BROIDA, A"
  ]
  node
  [
    id 271
    label "CLAFFY, K"
  ]
  node
  [
    id 272
    label "BUCHANAN, M"
  ]
  node
  [
    id 273
    label "BUCHEL, C"
  ]
  node
  [
    id 274
    label "COULL, J"
  ]
  node
  [
    id 275
    label "FRISTON, K"
  ]
  node
  [
    id 276
    label "BUCOLO, M"
  ]
  node
  [
    id 277
    label "FORTUNA, L"
  ]
  node
  [
    id 278
    label "LAROSA, M"
  ]
  node
  [
    id 279
    label "BUHL, J"
  ]
  node
  [
    id 280
    label "GAUTRAIS, J"
  ]
  node
  [
    id 281
    label "SOLE, R"
  ]
  node
  [
    id 282
    label "KUNTZ, P"
  ]
  node
  [
    id 283
    label "VALVERDE, S"
  ]
  node
  [
    id 284
    label "DENEUBOURG, J"
  ]
  node
  [
    id 285
    label "THERAULAZ, G"
  ]
  node
  [
    id 286
    label "BURDA, Z"
  ]
  node
  [
    id 287
    label "CORREIA, J"
  ]
  node
  [
    id 288
    label "KRZYWICKI, A"
  ]
  node
  [
    id 289
    label "JURKIEWICZ, J"
  ]
  node
  [
    id 290
    label "BURIONI, R"
  ]
  node
  [
    id 291
    label "CASSI, D"
  ]
  node
  [
    id 292
    label "VEZZANI, A"
  ]
  node
  [
    id 293
    label "BURNS, G"
  ]
  node
  [
    id 294
    label "YOUNG, M"
  ]
  node
  [
    id 295
    label "BURT, R"
  ]
  node
  [
    id 296
    label "BUZSAKI, G"
  ]
  node
  [
    id 297
    label "CHROBAK, J"
  ]
  node
  [
    id 298
    label "GEISLER, C"
  ]
  node
  [
    id 299
    label "HENZE, D"
  ]
  node
  [
    id 300
    label "WANG, X"
  ]
  node
  [
    id 301
    label "CALDARELLI, G"
  ]
  node
  [
    id 302
    label "DELOSRIOS, P"
  ]
  node
  [
    id 303
    label "MUNOZ, M"
  ]
  node
  [
    id 304
    label "COCCETTI, F"
  ]
  node
  [
    id 305
    label "CALLAWAY, D"
  ]
  node
  [
    id 306
    label "HOPCROFT, J"
  ]
  node
  [
    id 307
    label "KLEINBERG, J"
  ]
  node
  [
    id 308
    label "STROGATZ, S"
  ]
  node
  [
    id 309
    label "WATTS, D"
  ]
  node
  [
    id 310
    label "CAMACHO, J"
  ]
  node
  [
    id 311
    label "CAMPBELL, N"
  ]
  node
  [
    id 312
    label "REECE, J"
  ]
  node
  [
    id 313
    label "CAMPBELL, S"
  ]
  node
  [
    id 314
    label "WANG, D"
  ]
  node
  [
    id 315
    label "JAYAPRAKASH, C"
  ]
  node
  [
    id 316
    label "SERVEDIO, V"
  ]
  node
  [
    id 317
    label "COLAIORI, F"
  ]
  node
  [
    id 318
    label "CARLSON, J"
  ]
  node
  [
    id 319
    label "DOYLE, J"
  ]
  node
  [
    id 320
    label "CARRERAS, B"
  ]
  node
  [
    id 321
    label "LYNCH, V"
  ]
  node
  [
    id 322
    label "DOBSON, I"
  ]
  node
  [
    id 323
    label "NEWMAN, D"
  ]
  node
  [
    id 324
    label "DOLROU, I"
  ]
  node
  [
    id 325
    label "POOLE, A"
  ]
  node
  [
    id 326
    label "CARUSO, F"
  ]
  node
  [
    id 327
    label "LATORA, V"
  ]
  node
  [
    id 328
    label "RAPISARDA, A"
  ]
  node
  [
    id 329
    label "TADIC, B"
  ]
  node
  [
    id 330
    label "CASTELLANO, C"
  ]
  node
  [
    id 331
    label "VILONE, D"
  ]
  node
  [
    id 332
    label "CATANIA, J"
  ]
  node
  [
    id 333
    label "COATES, T"
  ]
  node
  [
    id 334
    label "KEGELS, S"
  ]
  node
  [
    id 335
    label "FULLILOVE, M"
  ]
  node
  [
    id 336
    label "CHALLET, D"
  ]
  node
  [
    id 337
    label "ZHANG, Y"
  ]
  node
  [
    id 338
    label "CHAN, D"
  ]
  node
  [
    id 339
    label "HUGHES, B"
  ]
  node
  [
    id 340
    label "LEONG, A"
  ]
  node
  [
    id 341
    label "REED, W"
  ]
  node
  [
    id 342
    label "CHATE, H"
  ]
  node
  [
    id 343
    label "PIKOVSKY, A"
  ]
  node
  [
    id 344
    label "RUDZICK, O"
  ]
  node
  [
    id 345
    label "CHAVEZ, M"
  ]
  node
  [
    id 346
    label "HWANG, D"
  ]
  node
  [
    id 347
    label "AMANN, A"
  ]
  node
  [
    id 348
    label "CHEN, Q"
  ]
  node
  [
    id 349
    label "CHANG, H"
  ]
  node
  [
    id 350
    label "GOVINDAN, R"
  ]
  node
  [
    id 351
    label "JAMIN, S"
  ]
  node
  [
    id 352
    label "SHENKER, S"
  ]
  node
  [
    id 353
    label "WILLINGER, W"
  ]
  node
  [
    id 354
    label "CHEN, Y"
  ]
  node
  [
    id 355
    label "RANGARAJAN, G"
  ]
  node
  [
    id 356
    label "DING, M"
  ]
  node
  [
    id 357
    label "CHERNIAK, C"
  ]
  node
  [
    id 358
    label "CHANGIZI, M"
  ]
  node
  [
    id 359
    label "KANG, D"
  ]
  node
  [
    id 360
    label "MOKHTARZADA, Z"
  ]
  node
  [
    id 361
    label "RODRIGUEZESTEBAN, R"
  ]
  node
  [
    id 362
    label "CHKLOVSKII, D"
  ]
  node
  [
    id 363
    label "KOULAKOV, A"
  ]
  node
  [
    id 364
    label "MEL, B"
  ]
  node
  [
    id 365
    label "SVOBODA, K"
  ]
  node
  [
    id 366
    label "CHOWELL, G"
  ]
  node
  [
    id 367
    label "HYMAN, J"
  ]
  node
  [
    id 368
    label "EUBANK, S"
  ]
  node
  [
    id 369
    label "VU, V"
  ]
  node
  [
    id 370
    label "CLAUSET, A"
  ]
  node
  [
    id 371
    label "MOORE, C"
  ]
  node
  [
    id 372
    label "COHEN, J"
  ]
  node
  [
    id 373
    label "BRIAND, F"
  ]
  node
  [
    id 374
    label "NEWMAN, C"
  ]
  node
  [
    id 375
    label "COHEN, R"
  ]
  node
  [
    id 376
    label "BENAVRAHAM, D"
  ]
  node
  [
    id 377
    label "HAVLIN, S"
  ]
  node
  [
    id 378
    label "EREZ, K"
  ]
  node
  [
    id 379
    label "CONNOR, R"
  ]
  node
  [
    id 380
    label "HEITHAUS, M"
  ]
  node
  [
    id 381
    label "BARRE, L"
  ]
  node
  [
    id 382
    label "COPPERSMITH, S"
  ]
  node
  [
    id 383
    label "KADANOFF, L"
  ]
  node
  [
    id 384
    label "ZHANG, Z"
  ]
  node
  [
    id 385
    label "CORDES, D"
  ]
  node
  [
    id 386
    label "HAUGHTON, V"
  ]
  node
  [
    id 387
    label "ARFANAKIS, K"
  ]
  node
  [
    id 388
    label "CAREW, J"
  ]
  node
  [
    id 389
    label "TURSKI, P"
  ]
  node
  [
    id 390
    label "MORITZ, C"
  ]
  node
  [
    id 391
    label "QUIGLEY, M"
  ]
  node
  [
    id 392
    label "MEYERAND, M"
  ]
  node
  [
    id 393
    label "CORMAN, S"
  ]
  node
  [
    id 394
    label "KUHN, T"
  ]
  node
  [
    id 395
    label "MCPHEE, R"
  ]
  node
  [
    id 396
    label "DOOLEY, K"
  ]
  node
  [
    id 397
    label "CORMEN, T"
  ]
  node
  [
    id 398
    label "LEISERSON, C"
  ]
  node
  [
    id 399
    label "RIVEST, R"
  ]
  node
  [
    id 400
    label "STEIN, C"
  ]
  node
  [
    id 401
    label "COSENZA, S"
  ]
  node
  [
    id 402
    label "CRUCITTI, P"
  ]
  node
  [
    id 403
    label "FRASCA, M"
  ]
  node
  [
    id 404
    label "STAGNI, C"
  ]
  node
  [
    id 405
    label "USAI, L"
  ]
  node
  [
    id 406
    label "COULUMB, S"
  ]
  node
  [
    id 407
    label "CRANE, D"
  ]
  node
  [
    id 408
    label "CRIADO, R"
  ]
  node
  [
    id 409
    label "FLORES, J"
  ]
  node
  [
    id 410
    label "HERNANDEZBERMEJO, B"
  ]
  node
  [
    id 411
    label "PELLO, J"
  ]
  node
  [
    id 412
    label "ROMANCE, M"
  ]
  node
  [
    id 413
    label "GARCIADELAMO, A"
  ]
  node
  [
    id 414
    label "CRICK, F"
  ]
  node
  [
    id 415
    label "KOCH, C"
  ]
  node
  [
    id 416
    label "MARCHIORI, M"
  ]
  node
  [
    id 417
    label "PORTA, S"
  ]
  node
  [
    id 418
    label "CSANYI, G"
  ]
  node
  [
    id 419
    label "SZENDROI, B"
  ]
  node
  [
    id 420
    label "CSERMELY, P"
  ]
  node
  [
    id 421
    label "CSETE, M"
  ]
  node
  [
    id 422
    label "CUNHA, C"
  ]
  node
  [
    id 423
    label "BESTAVROS, A"
  ]
  node
  [
    id 424
    label "CROVELLA, M"
  ]
  node
  [
    id 425
    label "CVETKOVIC, D"
  ]
  node
  [
    id 426
    label "DOOB, M"
  ]
  node
  [
    id 427
    label "SACHS, H"
  ]
  node
  [
    id 428
    label "DAFONTOURACOSTA, L"
  ]
  node
  [
    id 429
    label "DIAMBRA, L"
  ]
  node
  [
    id 430
    label "DALEY, D"
  ]
  node
  [
    id 431
    label "GANI, J"
  ]
  node
  [
    id 432
    label "KENDALL, D"
  ]
  node
  [
    id 433
    label "DALL, J"
  ]
  node
  [
    id 434
    label "CHRISTENSEN, M"
  ]
  node
  [
    id 435
    label "DAVIDSEN, J"
  ]
  node
  [
    id 436
    label "DAVIS, A"
  ]
  node
  [
    id 437
    label "GARDNER, B"
  ]
  node
  [
    id 438
    label "GARDNER, M"
  ]
  node
  [
    id 439
    label "DAVIS, G"
  ]
  node
  [
    id 440
    label "GREVE, H"
  ]
  node
  [
    id 441
    label "YOO, M"
  ]
  node
  [
    id 442
    label "DEARCANGELIS, L"
  ]
  node
  [
    id 443
    label "HERRMANN, H"
  ]
  node
  [
    id 444
    label "DECASTRO, R"
  ]
  node
  [
    id 445
    label "GROSSMAN, J"
  ]
  node
  [
    id 446
    label "DEFFUANT, G"
  ]
  node
  [
    id 447
    label "NEAU, D"
  ]
  node
  [
    id 448
    label "AMBLARD, F"
  ]
  node
  [
    id 449
    label "WEISBUCH, G"
  ]
  node
  [
    id 450
    label "DEFRAYSSEIX, H"
  ]
  node
  [
    id 451
    label "DEGROOT, M"
  ]
  node
  [
    id 452
    label "DELIMAESILVA, D"
  ]
  node
  [
    id 453
    label "MEDEIROSSOARES, M"
  ]
  node
  [
    id 454
    label "HENRIQUES, M"
  ]
  node
  [
    id 455
    label "SCHIVANIALVES, M"
  ]
  node
  [
    id 456
    label "DEAGUILAR, S"
  ]
  node
  [
    id 457
    label "DECARVALHO, T"
  ]
  node
  [
    id 458
    label "CORSO, G"
  ]
  node
  [
    id 459
    label "LUCENA, L"
  ]
  node
  [
    id 460
    label "DELUCIA, M"
  ]
  node
  [
    id 461
    label "BOTTACCIO, M"
  ]
  node
  [
    id 462
    label "MONTUORI, M"
  ]
  node
  [
    id 463
    label "PIETRONERO, L"
  ]
  node
  [
    id 464
    label "DEMENEZES, M"
  ]
  node
  [
    id 465
    label "MOUKARZEL, C"
  ]
  node
  [
    id 466
    label "PENNA, T"
  ]
  node
  [
    id 467
    label "DEMERS, A"
  ]
  node
  [
    id 468
    label "GREENE, D"
  ]
  node
  [
    id 469
    label "HAUSER, C"
  ]
  node
  [
    id 470
    label "IRISH, W"
  ]
  node
  [
    id 471
    label "LARSON, J"
  ]
  node
  [
    id 472
    label "DEMOURA, A"
  ]
  node
  [
    id 473
    label "MOTTER, A"
  ]
  node
  [
    id 474
    label "GREBOGI, C"
  ]
  node
  [
    id 475
    label "DERRIDA, B"
  ]
  node
  [
    id 476
    label "FLYVBJERG, H"
  ]
  node
  [
    id 477
    label "GARDNER, E"
  ]
  node
  [
    id 478
    label "ZIPPELIUS, A"
  ]
  node
  [
    id 479
    label "DESHAZER, D"
  ]
  node
  [
    id 480
    label "BREBAN, R"
  ]
  node
  [
    id 481
    label "OTT, E"
  ]
  node
  [
    id 482
    label "ROY, R"
  ]
  node
  [
    id 483
    label "DESTEXHE, A"
  ]
  node
  [
    id 484
    label "MARDER, E"
  ]
  node
  [
    id 485
    label "DEZSO, Z"
  ]
  node
  [
    id 486
    label "DIEKMANN, O"
  ]
  node
  [
    id 487
    label "HEESTERBEEK, J"
  ]
  node
  [
    id 488
    label "DOBRIN, R"
  ]
  node
  [
    id 489
    label "BEG, Q"
  ]
  node
  [
    id 490
    label "DODDS, P"
  ]
  node
  [
    id 491
    label "MUHAMAD, R"
  ]
  node
  [
    id 492
    label "ROTHMAN, D"
  ]
  node
  [
    id 493
    label "SABEL, C"
  ]
  node
  [
    id 494
    label "DODEL, S"
  ]
  node
  [
    id 495
    label "HERRMANN, J"
  ]
  node
  [
    id 496
    label "GEISEL, T"
  ]
  node
  [
    id 497
    label "DONATH, W"
  ]
  node
  [
    id 498
    label "HOFFMAN, A"
  ]
  node
  [
    id 499
    label "DONETTI, L"
  ]
  node
  [
    id 500
    label "DOROGOVTSEV, S"
  ]
  node
  [
    id 501
    label "GOLTSEV, A"
  ]
  node
  [
    id 502
    label "MENDES, J"
  ]
  node
  [
    id 503
    label "SAMUKHIN, A"
  ]
  node
  [
    id 504
    label "DOYE, J"
  ]
  node
  [
    id 505
    label "DU, D"
  ]
  node
  [
    id 506
    label "GU, J"
  ]
  node
  [
    id 507
    label "DUNNE, J"
  ]
  node
  [
    id 508
    label "WILLIAMS, R"
  ]
  node
  [
    id 509
    label "MARTINEZ, N"
  ]
  node
  [
    id 510
    label "DURRETT, R"
  ]
  node
  [
    id 511
    label "EAMES, K"
  ]
  node
  [
    id 512
    label "KEELING, M"
  ]
  node
  [
    id 513
    label "MIELSCH, L"
  ]
  node
  [
    id 514
    label "ECHENIQUE, P"
  ]
  node
  [
    id 515
    label "GOMEZGARDENES, J"
  ]
  node
  [
    id 516
    label "MORENO, Y"
  ]
  node
  [
    id 517
    label "VAZQUEZ, A"
  ]
  node
  [
    id 518
    label "ECKMANN, J"
  ]
  node
  [
    id 519
    label "MOSES, E"
  ]
  node
  [
    id 520
    label "EGGHE, L"
  ]
  node
  [
    id 521
    label "ROUSSEAU, R"
  ]
  node
  [
    id 522
    label "EGUILUZ, V"
  ]
  node
  [
    id 523
    label "CHIALVO, D"
  ]
  node
  [
    id 524
    label "CECCHI, G"
  ]
  node
  [
    id 525
    label "BALIKI, M"
  ]
  node
  [
    id 526
    label "APKARIAN, A"
  ]
  node
  [
    id 527
    label "KLEMM, K"
  ]
  node
  [
    id 528
    label "EIGEN, M"
  ]
  node
  [
    id 529
    label "SCHUSTER, P"
  ]
  node
  [
    id 530
    label "EISENBERG, D"
  ]
  node
  [
    id 531
    label "MARCOTTE, E"
  ]
  node
  [
    id 532
    label "XENARIOS, I"
  ]
  node
  [
    id 533
    label "YEATES, T"
  ]
  node
  [
    id 534
    label "EISENBERG, E"
  ]
  node
  [
    id 535
    label "LEVANON, E"
  ]
  node
  [
    id 536
    label "ELDAR, A"
  ]
  node
  [
    id 537
    label "ENGEL, A"
  ]
  node
  [
    id 538
    label "FRIES, P"
  ]
  node
  [
    id 539
    label "SINGER, W"
  ]
  node
  [
    id 540
    label "MOLL, C"
  ]
  node
  [
    id 541
    label "FRIED, I"
  ]
  node
  [
    id 542
    label "OJEMANN, G"
  ]
  node
  [
    id 543
    label "ENNIS, J"
  ]
  node
  [
    id 544
    label "ERDOS, P"
  ]
  node
  [
    id 545
    label "RENYI, A"
  ]
  node
  [
    id 546
    label "ERGUN, G"
  ]
  node
  [
    id 547
    label "RODGERS, G"
  ]
  node
  [
    id 548
    label "ERIKSEN, K"
  ]
  node
  [
    id 549
    label "SIMONSEN, I"
  ]
  node
  [
    id 550
    label "MASLOV, S"
  ]
  node
  [
    id 551
    label "EVERITT, B"
  ]
  node
  [
    id 552
    label "FABRIKANT, A"
  ]
  node
  [
    id 553
    label "KOUTSOUPIAS, E"
  ]
  node
  [
    id 554
    label "PAPADIMITRIOU, C"
  ]
  node
  [
    id 555
    label "FALCONER, K"
  ]
  node
  [
    id 556
    label "FALOUTSOS, M"
  ]
  node
  [
    id 557
    label "FALOUTSOS, P"
  ]
  node
  [
    id 558
    label "FALOUTSOS, C"
  ]
  node
  [
    id 559
    label "FARARO, T"
  ]
  node
  [
    id 560
    label "SUNSHINE, M"
  ]
  node
  [
    id 561
    label "FARKAS, I"
  ]
  node
  [
    id 562
    label "DERENYI, I"
  ]
  node
  [
    id 563
    label "FAUST, K"
  ]
  node
  [
    id 564
    label "WILLERT, K"
  ]
  node
  [
    id 565
    label "ROWLEE, D"
  ]
  node
  [
    id 566
    label "SKVORETZ, J"
  ]
  node
  [
    id 567
    label "FELL, D"
  ]
  node
  [
    id 568
    label "FELLEMAN, D"
  ]
  node
  [
    id 569
    label "VANESSEN, D"
  ]
  node
  [
    id 570
    label "FEMAT, R"
  ]
  node
  [
    id 571
    label "SOLISPERALES, G"
  ]
  node
  [
    id 572
    label "FERGUSON, N"
  ]
  node
  [
    id 573
    label "GARNETT, G"
  ]
  node
  [
    id 574
    label "FERRERICANCHO, R"
  ]
  node
  [
    id 575
    label "JANSSEN, C"
  ]
  node
  [
    id 576
    label "KOHLER, R"
  ]
  node
  [
    id 577
    label "FIDUCCIA, C"
  ]
  node
  [
    id 578
    label "MATTHEYSES, R"
  ]
  node
  [
    id 579
    label "FIEDLER, M"
  ]
  node
  [
    id 580
    label "FILATRELLA, G"
  ]
  node
  [
    id 581
    label "STRAUGHN, B"
  ]
  node
  [
    id 582
    label "BARBARA, P"
  ]
  node
  [
    id 583
    label "FINGELKURTS, A"
  ]
  node
  [
    id 584
    label "KAHKONEN, S"
  ]
  node
  [
    id 585
    label "FINK, K"
  ]
  node
  [
    id 586
    label "JOHNSON, G"
  ]
  node
  [
    id 587
    label "CARROLL, T"
  ]
  node
  [
    id 588
    label "FITZHUGH, R"
  ]
  node
  [
    id 589
    label "FLAKE, G"
  ]
  node
  [
    id 590
    label "LAWRENCE, S"
  ]
  node
  [
    id 591
    label "GILES, C"
  ]
  node
  [
    id 592
    label "COETZEE, F"
  ]
  node
  [
    id 593
    label "FONTES, L"
  ]
  node
  [
    id 594
    label "SCHONMANN, R"
  ]
  node
  [
    id 595
    label "SPATA, A"
  ]
  node
  [
    id 596
    label "FORTUNATO, S"
  ]
  node
  [
    id 597
    label "FOSTER, I"
  ]
  node
  [
    id 598
    label "KESSELMAN, C"
  ]
  node
  [
    id 599
    label "FOX, J"
  ]
  node
  [
    id 600
    label "HILL, C"
  ]
  node
  [
    id 601
    label "FRANK, L"
  ]
  node
  [
    id 602
    label "FRANK, O"
  ]
  node
  [
    id 603
    label "STRAUSS, D"
  ]
  node
  [
    id 604
    label "FREEMAN, L"
  ]
  node
  [
    id 605
    label "FRENCH, J"
  ]
  node
  [
    id 606
    label "FRITH, C"
  ]
  node
  [
    id 607
    label "LIDDLE, P"
  ]
  node
  [
    id 608
    label "FRACKOWIAK, R"
  ]
  node
  [
    id 609
    label "FRONCZAK, A"
  ]
  node
  [
    id 610
    label "FRONCZAK, P"
  ]
  node
  [
    id 611
    label "JEDYNAK, M"
  ]
  node
  [
    id 612
    label "SIENKIEWICZ, J"
  ]
  node
  [
    id 613
    label "FU, C"
  ]
  node
  [
    id 614
    label "FUJISAKA, H"
  ]
  node
  [
    id 615
    label "YAMADA, T"
  ]
  node
  [
    id 616
    label "GADE, P"
  ]
  node
  [
    id 617
    label "HU, C"
  ]
  node
  [
    id 618
    label "GAFIYCHUK, V"
  ]
  node
  [
    id 619
    label "LUBASHEVSKY, I"
  ]
  node
  [
    id 620
    label "STOSYK, A"
  ]
  node
  [
    id 621
    label "GALASKIEWICZ, J"
  ]
  node
  [
    id 622
    label "MARSDEN, P"
  ]
  node
  [
    id 623
    label "GALSTYAN, A"
  ]
  node
  [
    id 624
    label "LERMAN, K"
  ]
  node
  [
    id 625
    label "GAMMAITONI, L"
  ]
  node
  [
    id 626
    label "HANGGI, P"
  ]
  node
  [
    id 627
    label "JUNG, P"
  ]
  node
  [
    id 628
    label "MARCHESONI, F"
  ]
  node
  [
    id 629
    label "GAO, Z"
  ]
  node
  [
    id 630
    label "HU, B"
  ]
  node
  [
    id 631
    label "HU, G"
  ]
  node
  [
    id 632
    label "GAREY, M"
  ]
  node
  [
    id 633
    label "JOHNSON, D"
  ]
  node
  [
    id 634
    label "GARFIELD, E"
  ]
  node
  [
    id 635
    label "GARFINKEL, I"
  ]
  node
  [
    id 636
    label "GLEI, D"
  ]
  node
  [
    id 637
    label "MCLANAHAN, S"
  ]
  node
  [
    id 638
    label "GARLASCHELLI, D"
  ]
  node
  [
    id 639
    label "CASTRI, M"
  ]
  node
  [
    id 640
    label "LOFFREDO, M"
  ]
  node
  [
    id 641
    label "GASTNER, M"
  ]
  node
  [
    id 642
    label "GAUTHIER, D"
  ]
  node
  [
    id 643
    label "BIENFANG, J"
  ]
  node
  [
    id 644
    label "GERSCHGORIN, S"
  ]
  node
  [
    id 645
    label "GIOT, L"
  ]
  node
  [
    id 646
    label "GIRVAN, M"
  ]
  node
  [
    id 647
    label "GLANZ, J"
  ]
  node
  [
    id 648
    label "PEREZPENA, R"
  ]
  node
  [
    id 649
    label "GLASS, L"
  ]
  node
  [
    id 650
    label "GLEISS, P"
  ]
  node
  [
    id 651
    label "STADLER, P"
  ]
  node
  [
    id 652
    label "GOH, K"
  ]
  node
  [
    id 653
    label "GHIM, C"
  ]
  node
  [
    id 654
    label "KAHNG, B"
  ]
  node
  [
    id 655
    label "KIM, D"
  ]
  node
  [
    id 656
    label "LEE, D"
  ]
  node
  [
    id 657
    label "OH, E"
  ]
  node
  [
    id 658
    label "GOLDBERG, D"
  ]
  node
  [
    id 659
    label "NICHOLS, D"
  ]
  node
  [
    id 660
    label "OKI, B"
  ]
  node
  [
    id 661
    label "TERRY, D"
  ]
  node
  [
    id 662
    label "GOLDBETER, A"
  ]
  node
  [
    id 663
    label "GONZE, D"
  ]
  node
  [
    id 664
    label "HOUART, G"
  ]
  node
  [
    id 665
    label "LELOUP, J"
  ]
  node
  [
    id 666
    label "DUPONT, G"
  ]
  node
  [
    id 667
    label "GOLDWASSER, L"
  ]
  node
  [
    id 668
    label "ROUGHGARDEN, J"
  ]
  node
  [
    id 669
    label "GOLOMB, D"
  ]
  node
  [
    id 670
    label "HANSEL, D"
  ]
  node
  [
    id 671
    label "RINZEL, J"
  ]
  node
  [
    id 672
    label "GOLUB, G"
  ]
  node
  [
    id 673
    label "VANLOAN, C"
  ]
  node
  [
    id 674
    label "FLORIA, L"
  ]
  node
  [
    id 675
    label "GONZALES, M"
  ]
  node
  [
    id 676
    label "SOUSA, A"
  ]
  node
  [
    id 677
    label "HALLY, J"
  ]
  node
  [
    id 678
    label "GOODHILL, A"
  ]
  node
  [
    id 679
    label "SIMMEN, M"
  ]
  node
  [
    id 680
    label "WILLSHAW, D"
  ]
  node
  [
    id 681
    label "GOODMAN, M"
  ]
  node
  [
    id 682
    label "HALL, D"
  ]
  node
  [
    id 683
    label "AVERY, L"
  ]
  node
  [
    id 684
    label "LOCKERY, S"
  ]
  node
  [
    id 685
    label "GORMAN, S"
  ]
  node
  [
    id 686
    label "TANGMUNARUNKIT, H"
  ]
  node
  [
    id 687
    label "GRANOVETTER, M"
  ]
  node
  [
    id 688
    label "GRASSBERGER, P"
  ]
  node
  [
    id 689
    label "GRAY, C"
  ]
  node
  [
    id 690
    label "KONIG, P"
  ]
  node
  [
    id 691
    label "GREENHALGH, D"
  ]
  node
  [
    id 692
    label "GREGOIRE, G"
  ]
  node
  [
    id 693
    label "GROSS, J"
  ]
  node
  [
    id 694
    label "KUJALA, J"
  ]
  node
  [
    id 695
    label "HAMALAINEN, M"
  ]
  node
  [
    id 696
    label "TIMMERMANN, L"
  ]
  node
  [
    id 697
    label "SCHNITZLER, A"
  ]
  node
  [
    id 698
    label "SALMELIN, R"
  ]
  node
  [
    id 699
    label "ION, P"
  ]
  node
  [
    id 700
    label "GUARDIOLA, X"
  ]
  node
  [
    id 701
    label "LLAS, M"
  ]
  node
  [
    id 702
    label "PEREZ, C"
  ]
  node
  [
    id 703
    label "GUARE, J"
  ]
  node
  [
    id 704
    label "GUELZIM, N"
  ]
  node
  [
    id 705
    label "BOTTANI, S"
  ]
  node
  [
    id 706
    label "BOURGINE, P"
  ]
  node
  [
    id 707
    label "KEPES, F"
  ]
  node
  [
    id 708
    label "GIRALT, F"
  ]
  node
  [
    id 709
    label "MOSSA, S"
  ]
  node
  [
    id 710
    label "TURTSCHI, A"
  ]
  node
  [
    id 711
    label "GUPTA, S"
  ]
  node
  [
    id 712
    label "HALL, G"
  ]
  node
  [
    id 713
    label "BAHAR, S"
  ]
  node
  [
    id 714
    label "HALL, K"
  ]
  node
  [
    id 715
    label "HARI, R"
  ]
  node
  [
    id 716
    label "ILMONIEMI, R"
  ]
  node
  [
    id 717
    label "KNUUTILA, J"
  ]
  node
  [
    id 718
    label "LOUNASMAA, O"
  ]
  node
  [
    id 719
    label "HANDCOCK, M"
  ]
  node
  [
    id 720
    label "JONES, J"
  ]
  node
  [
    id 721
    label "SOMPOLINSKY, H"
  ]
  node
  [
    id 722
    label "HARARY, F"
  ]
  node
  [
    id 723
    label "HARWELL, L"
  ]
  node
  [
    id 724
    label "HOPFIELD, J"
  ]
  node
  [
    id 725
    label "LEIBLER, S"
  ]
  node
  [
    id 726
    label "MURRAY, A"
  ]
  node
  [
    id 727
    label "HAYES, B"
  ]
  node
  [
    id 728
    label "HAYNIE, D"
  ]
  node
  [
    id 729
    label "HEAGY, J"
  ]
  node
  [
    id 730
    label "HEGSELMANN, R"
  ]
  node
  [
    id 731
    label "KRAUSE, U"
  ]
  node
  [
    id 732
    label "HE, M"
  ]
  node
  [
    id 733
    label "XU, H"
  ]
  node
  [
    id 734
    label "SUN, Q"
  ]
  node
  [
    id 735
    label "HERRERO, C"
  ]
  node
  [
    id 736
    label "HERRMANN, C"
  ]
  node
  [
    id 737
    label "PROVERO, P"
  ]
  node
  [
    id 738
    label "HONG, D"
  ]
  node
  [
    id 739
    label "ROUX, S"
  ]
  node
  [
    id 740
    label "HETHCOTE, H"
  ]
  node
  [
    id 741
    label "HIGHAM, D"
  ]
  node
  [
    id 742
    label "HILGETAG, C"
  ]
  node
  [
    id 743
    label "ONEILL, M"
  ]
  node
  [
    id 744
    label "SCANNELL, J"
  ]
  node
  [
    id 745
    label "GRANT, A"
  ]
  node
  [
    id 746
    label "KAISER, M"
  ]
  node
  [
    id 747
    label "HILLIER, B"
  ]
  node
  [
    id 748
    label "HANSON, J"
  ]
  node
  [
    id 749
    label "HIRSCH, J"
  ]
  node
  [
    id 750
    label "HODGKIN, A"
  ]
  node
  [
    id 751
    label "HUXLEY, A"
  ]
  node
  [
    id 752
    label "HOFF, P"
  ]
  node
  [
    id 753
    label "RAFTERY, A"
  ]
  node
  [
    id 754
    label "HOLLAND, P"
  ]
  node
  [
    id 755
    label "LEINHARDT, S"
  ]
  node
  [
    id 756
    label "HOLME, P"
  ]
  node
  [
    id 757
    label "EDLING, C"
  ]
  node
  [
    id 758
    label "LILJEROS, F"
  ]
  node
  [
    id 759
    label "GHOSHAL, G"
  ]
  node
  [
    id 760
    label "HUSS, M"
  ]
  node
  [
    id 761
    label "KIM, B"
  ]
  node
  [
    id 762
    label "YOON, C"
  ]
  node
  [
    id 763
    label "HAN, S"
  ]
  node
  [
    id 764
    label "TRUSINA, A"
  ]
  node
  [
    id 765
    label "MINNHAGEN, P"
  ]
  node
  [
    id 766
    label "HOLMGREN, C"
  ]
  node
  [
    id 767
    label "HARKANY, T"
  ]
  node
  [
    id 768
    label "SVENNENFORS, B"
  ]
  node
  [
    id 769
    label "ZILBERTER, Y"
  ]
  node
  [
    id 770
    label "HOLTER, N"
  ]
  node
  [
    id 771
    label "MITRA, M"
  ]
  node
  [
    id 772
    label "CIEPLAK, M"
  ]
  node
  [
    id 773
    label "FEDROFF, N"
  ]
  node
  [
    id 774
    label "HONG, H"
  ]
  node
  [
    id 775
    label "CHOI, M"
  ]
  node
  [
    id 776
    label "PARK, H"
  ]
  node
  [
    id 777
    label "HORN, N"
  ]
  node
  [
    id 778
    label "RUPPIN, E"
  ]
  node
  [
    id 779
    label "HORWITZ, B"
  ]
  node
  [
    id 780
    label "HUFNAGEL, L"
  ]
  node
  [
    id 781
    label "BROCKMANN, D"
  ]
  node
  [
    id 782
    label "HUGENII, C"
  ]
  node
  [
    id 783
    label "YANG, J"
  ]
  node
  [
    id 784
    label "LIU, W"
  ]
  node
  [
    id 785
    label "HUXHAM, M"
  ]
  node
  [
    id 786
    label "BEANEY, S"
  ]
  node
  [
    id 787
    label "RAFFAELLI, D"
  ]
  node
  [
    id 788
    label "LOPEZRUIZ, R"
  ]
  node
  [
    id 789
    label "IAMNITCHI, A"
  ]
  node
  [
    id 790
    label "RIPEANU, M"
  ]
  node
  [
    id 791
    label "ICHINOMIYA, T"
  ]
  node
  [
    id 792
    label "IGOSHIN, O"
  ]
  node
  [
    id 793
    label "KAISER, D"
  ]
  node
  [
    id 794
    label "OSTER, G"
  ]
  node
  [
    id 795
    label "IHMELS, J"
  ]
  node
  [
    id 796
    label "FRIEDLANDER, G"
  ]
  node
  [
    id 797
    label "BERGMANN, S"
  ]
  node
  [
    id 798
    label "OFERSARIG, Y"
  ]
  node
  [
    id 799
    label "ITO, T"
  ]
  node
  [
    id 800
    label "CHIBA, T"
  ]
  node
  [
    id 801
    label "OZAWA, R"
  ]
  node
  [
    id 802
    label "YOSHIDA, M"
  ]
  node
  [
    id 803
    label "HATTORI, M"
  ]
  node
  [
    id 804
    label "SAKAKI, Y"
  ]
  node
  [
    id 805
    label "ITZKOVITZ, S"
  ]
  node
  [
    id 806
    label "MILO, R"
  ]
  node
  [
    id 807
    label "KASHTAN, N"
  ]
  node
  [
    id 808
    label "ZIV, G"
  ]
  node
  [
    id 809
    label "JACOB, F"
  ]
  node
  [
    id 810
    label "MONOD, J"
  ]
  node
  [
    id 811
    label "JACOBSON, V"
  ]
  node
  [
    id 812
    label "JAFFE, A"
  ]
  node
  [
    id 813
    label "TRAJTENBERG, M"
  ]
  node
  [
    id 814
    label "JAIN, A"
  ]
  node
  [
    id 815
    label "MURTY, M"
  ]
  node
  [
    id 816
    label "FLYNN, P"
  ]
  node
  [
    id 817
    label "JAIN, S"
  ]
  node
  [
    id 818
    label "KRISHNA, S"
  ]
  node
  [
    id 819
    label "JALAN, S"
  ]
  node
  [
    id 820
    label "AMRITKAR, R"
  ]
  node
  [
    id 821
    label "JANKOWSKI, S"
  ]
  node
  [
    id 822
    label "LONDEI, A"
  ]
  node
  [
    id 823
    label "MAZUR, C"
  ]
  node
  [
    id 824
    label "LOZOWSKI, A"
  ]
  node
  [
    id 825
    label "JANSEN, R"
  ]
  node
  [
    id 826
    label "YU, H"
  ]
  node
  [
    id 827
    label "GREENBAUM, D"
  ]
  node
  [
    id 828
    label "KLUGER, Y"
  ]
  node
  [
    id 829
    label "KROGAN, N"
  ]
  node
  [
    id 830
    label "CHUNG, S"
  ]
  node
  [
    id 831
    label "EMILI, A"
  ]
  node
  [
    id 832
    label "SNYDER, M"
  ]
  node
  [
    id 833
    label "GREENBLATT, J"
  ]
  node
  [
    id 834
    label "GERSTEIN, M"
  ]
  node
  [
    id 835
    label "JANSON, S"
  ]
  node
  [
    id 836
    label "LUCZAK, T"
  ]
  node
  [
    id 837
    label "RUCINSKI, A"
  ]
  node
  [
    id 838
    label "JENSEN, H"
  ]
  node
  [
    id 839
    label "MASON, S"
  ]
  node
  [
    id 840
    label "TOMBOR, B"
  ]
  node
  [
    id 841
    label "JESPERSEN, S"
  ]
  node
  [
    id 842
    label "BLUMEN, A"
  ]
  node
  [
    id 843
    label "SOKOLOV, I"
  ]
  node
  [
    id 844
    label "JIA, L"
  ]
  node
  [
    id 845
    label "SANO, M"
  ]
  node
  [
    id 846
    label "LAI, P"
  ]
  node
  [
    id 847
    label "CHAN, C"
  ]
  node
  [
    id 848
    label "JIANG, B"
  ]
  node
  [
    id 849
    label "CLARAMUNT, C"
  ]
  node
  [
    id 850
    label "JIANG, Y"
  ]
  node
  [
    id 851
    label "LOZADACASSOU, M"
  ]
  node
  [
    id 852
    label "VINET, A"
  ]
  node
  [
    id 853
    label "JIN, E"
  ]
  node
  [
    id 854
    label "JOHNSON, S"
  ]
  node
  [
    id 855
    label "JORDANO, P"
  ]
  node
  [
    id 856
    label "BASCOMPTE, J"
  ]
  node
  [
    id 857
    label "OLESEN, J"
  ]
  node
  [
    id 858
    label "JOSIC, K"
  ]
  node
  [
    id 859
    label "JOY, M"
  ]
  node
  [
    id 860
    label "JOUVE, B"
  ]
  node
  [
    id 861
    label "ROSENTIEHL, P"
  ]
  node
  [
    id 862
    label "IMBERT, M"
  ]
  node
  [
    id 863
    label "JUNG, S"
  ]
  node
  [
    id 864
    label "KIM, S"
  ]
  node
  [
    id 865
    label "PARK, Y"
  ]
  node
  [
    id 866
    label "KALAPALA, V"
  ]
  node
  [
    id 867
    label "SANWALANI, V"
  ]
  node
  [
    id 868
    label "KANEKO, K"
  ]
  node
  [
    id 869
    label "KARBOWSKI, J"
  ]
  node
  [
    id 870
    label "KAREV, G"
  ]
  node
  [
    id 871
    label "WOLF, Y"
  ]
  node
  [
    id 872
    label "RZHETSKY, A"
  ]
  node
  [
    id 873
    label "BEREZOVSKAYA, F"
  ]
  node
  [
    id 874
    label "KOONIN, E"
  ]
  node
  [
    id 875
    label "KARINTHY, F"
  ]
  node
  [
    id 876
    label "KARONSKI, M"
  ]
  node
  [
    id 877
    label "KARP, P"
  ]
  node
  [
    id 878
    label "RILEY, M"
  ]
  node
  [
    id 879
    label "PALEY, S"
  ]
  node
  [
    id 880
    label "PELLEGRINITOOLE, A"
  ]
  node
  [
    id 881
    label "KRUMMENACKER, M"
  ]
  node
  [
    id 882
    label "KAUFFMAN, S"
  ]
  node
  [
    id 883
    label "KAUTZ, H"
  ]
  node
  [
    id 884
    label "SELMAN, B"
  ]
  node
  [
    id 885
    label "SHAH, M"
  ]
  node
  [
    id 886
    label "KEPHART, J"
  ]
  node
  [
    id 887
    label "WHITE, S"
  ]
  node
  [
    id 888
    label "KERMARREC, A"
  ]
  node
  [
    id 889
    label "GANESH, A"
  ]
  node
  [
    id 890
    label "MASSOULIE, L"
  ]
  node
  [
    id 891
    label "KERNIGHAN, B"
  ]
  node
  [
    id 892
    label "CHUNG, J"
  ]
  node
  [
    id 893
    label "KIM, J"
  ]
  node
  [
    id 894
    label "KINNEY, R"
  ]
  node
  [
    id 895
    label "KINOUCHI, O"
  ]
  node
  [
    id 896
    label "MARTINEZ, A"
  ]
  node
  [
    id 897
    label "LIMA, G"
  ]
  node
  [
    id 898
    label "LOURENC, G"
  ]
  node
  [
    id 899
    label "RISAUGUSMAN, S"
  ]
  node
  [
    id 900
    label "KIRKPATRICK, S"
  ]
  node
  [
    id 901
    label "GELATT, C"
  ]
  node
  [
    id 902
    label "VECCHI, M"
  ]
  node
  [
    id 903
    label "KISS, I"
  ]
  node
  [
    id 904
    label "ZHAI, Y"
  ]
  node
  [
    id 905
    label "HUDSON, J"
  ]
  node
  [
    id 906
    label "KLECZKOWSKI, A"
  ]
  node
  [
    id 907
    label "GRENFELL, B"
  ]
  node
  [
    id 908
    label "KUMAR, S"
  ]
  node
  [
    id 909
    label "KLEVECZ, R"
  ]
  node
  [
    id 910
    label "BOLEN, J"
  ]
  node
  [
    id 911
    label "DURAN, O"
  ]
  node
  [
    id 912
    label "KLOVDAHL, A"
  ]
  node
  [
    id 913
    label "POTTERAT, J"
  ]
  node
  [
    id 914
    label "WOODHOUSE, D"
  ]
  node
  [
    id 915
    label "MUTH, J"
  ]
  node
  [
    id 916
    label "MUTH, S"
  ]
  node
  [
    id 917
    label "DARROW, W"
  ]
  node
  [
    id 918
    label "KLYACHKO, V"
  ]
  node
  [
    id 919
    label "KNUTH, D"
  ]
  node
  [
    id 920
    label "KOCAREV, L"
  ]
  node
  [
    id 921
    label "PARLITZ, U"
  ]
  node
  [
    id 922
    label "LAURENT, G"
  ]
  node
  [
    id 923
    label "KOCH, M"
  ]
  node
  [
    id 924
    label "NORRIS, D"
  ]
  node
  [
    id 925
    label "HUNDGEORGIADIS, M"
  ]
  node
  [
    id 926
    label "PATURI, R"
  ]
  node
  [
    id 927
    label "ERMENTROUT, B"
  ]
  node
  [
    id 928
    label "KOR, J"
  ]
  node
  [
    id 929
    label "KORTE, C"
  ]
  node
  [
    id 930
    label "MILGRAM, S"
  ]
  node
  [
    id 931
    label "KOTTER, R"
  ]
  node
  [
    id 932
    label "STEPHAN, K"
  ]
  node
  [
    id 933
    label "SOMMER, F"
  ]
  node
  [
    id 934
    label "LEYVRAZ, F"
  ]
  node
  [
    id 935
    label "KRAUSE, A"
  ]
  node
  [
    id 936
    label "FRANK, K"
  ]
  node
  [
    id 937
    label "MASON, D"
  ]
  node
  [
    id 938
    label "TAYLOR, W"
  ]
  node
  [
    id 939
    label "KREBS, V"
  ]
  node
  [
    id 940
    label "KREE, R"
  ]
  node
  [
    id 941
    label "KRETZSCHMAR, M"
  ]
  node
  [
    id 942
    label "VANDUYNHOVEN, Y"
  ]
  node
  [
    id 943
    label "SEVERIJNEN, A"
  ]
  node
  [
    id 944
    label "SIVAKUMAR, D"
  ]
  node
  [
    id 945
    label "UPFAL, E"
  ]
  node
  [
    id 946
    label "ZANETTE, D"
  ]
  node
  [
    id 947
    label "KURAMOTO, Y"
  ]
  node
  [
    id 948
    label "NAKAO, H"
  ]
  node
  [
    id 949
    label "KWON, O"
  ]
  node
  [
    id 950
    label "MOON, H"
  ]
  node
  [
    id 951
    label "LAGOFERNANDEZ, L"
  ]
  node
  [
    id 952
    label "CORBACHO, F"
  ]
  node
  [
    id 953
    label "HUERTA, R"
  ]
  node
  [
    id 954
    label "SIGUENZA, J"
  ]
  node
  [
    id 955
    label "LAHTINEN, J"
  ]
  node
  [
    id 956
    label "KASKI, K"
  ]
  node
  [
    id 957
    label "LAWNICZAK, A"
  ]
  node
  [
    id 958
    label "MAXIE, K"
  ]
  node
  [
    id 959
    label "GERISCH, A"
  ]
  node
  [
    id 960
    label "LEE, L"
  ]
  node
  [
    id 961
    label "HARRISON, L"
  ]
  node
  [
    id 962
    label "MECHELLI, A"
  ]
  node
  [
    id 963
    label "LEONE, M"
  ]
  node
  [
    id 964
    label "ZECCHINA, R"
  ]
  node
  [
    id 965
    label "LEVANQUYEN, M"
  ]
  node
  [
    id 966
    label "QUILICHINI, P"
  ]
  node
  [
    id 967
    label "BERNARD, C"
  ]
  node
  [
    id 968
    label "ESCLAPEZ, M"
  ]
  node
  [
    id 969
    label "BENARI, Y"
  ]
  node
  [
    id 970
    label "GOZLAN, H"
  ]
  node
  [
    id 971
    label "LEVIN, S"
  ]
  node
  [
    id 972
    label "LI, C"
  ]
  node
  [
    id 973
    label "CHEN, G"
  ]
  node
  [
    id 974
    label "LIEBERMAN, E"
  ]
  node
  [
    id 975
    label "HAUERT, C"
  ]
  node
  [
    id 976
    label "NOWAK, M"
  ]
  node
  [
    id 977
    label "ABERG, Y"
  ]
  node
  [
    id 978
    label "LI, R"
  ]
  node
  [
    id 979
    label "ERNEUX, T"
  ]
  node
  [
    id 980
    label "LI, S"
  ]
  node
  [
    id 981
    label "WAND, H"
  ]
  node
  [
    id 982
    label "OUYANG, Q"
  ]
  node
  [
    id 983
    label "LIU, Z"
  ]
  node
  [
    id 984
    label "LAI, Y"
  ]
  node
  [
    id 985
    label "HOPPENSTEADT, F"
  ]
  node
  [
    id 986
    label "YE, N"
  ]
  node
  [
    id 987
    label "LI, W"
  ]
  node
  [
    id 988
    label "CAI, X"
  ]
  node
  [
    id 989
    label "LI, X"
  ]
  node
  [
    id 990
    label "LLINAS, R"
  ]
  node
  [
    id 991
    label "LLOYD, A"
  ]
  node
  [
    id 992
    label "LOCKHART, D"
  ]
  node
  [
    id 993
    label "WINZELER, E"
  ]
  node
  [
    id 994
    label "LOGOTHETIS, N"
  ]
  node
  [
    id 995
    label "PAULS, J"
  ]
  node
  [
    id 996
    label "AUGATH, M"
  ]
  node
  [
    id 997
    label "TRINATH, T"
  ]
  node
  [
    id 998
    label "OELTERMANN, A"
  ]
  node
  [
    id 999
    label "LORRAIN, F"
  ]
  node
  [
    id 1000
    label "WHITE, H"
  ]
  node
  [
    id 1001
    label "LOTKA, A"
  ]
  node
  [
    id 1002
    label "LU, J"
  ]
  node
  [
    id 1003
    label "YU, X"
  ]
  node
  [
    id 1004
    label "CHEN, D"
  ]
  node
  [
    id 1005
    label "LUSSEAU, D"
  ]
  node
  [
    id 1006
    label "LU, W"
  ]
  node
  [
    id 1007
    label "CHEN, T"
  ]
  node
  [
    id 1008
    label "MACDONALD, P"
  ]
  node
  [
    id 1009
    label "MACGRAW, P"
  ]
  node
  [
    id 1010
    label "MENZINGER, M"
  ]
  node
  [
    id 1011
    label "MAHADEVAN, R"
  ]
  node
  [
    id 1012
    label "PALSSON, B"
  ]
  node
  [
    id 1013
    label "MA, H"
  ]
  node
  [
    id 1014
    label "ZENG, A"
  ]
  node
  [
    id 1015
    label "MAJORANA, E"
  ]
  node
  [
    id 1016
    label "MANGAN, S"
  ]
  node
  [
    id 1017
    label "MANNA, S"
  ]
  node
  [
    id 1018
    label "SEN, P"
  ]
  node
  [
    id 1019
    label "MARI, C"
  ]
  node
  [
    id 1020
    label "MARIOLIS, P"
  ]
  node
  [
    id 1021
    label "RIGON, R"
  ]
  node
  [
    id 1022
    label "GIACOMETTI, A"
  ]
  node
  [
    id 1023
    label "RODRIGUEZITURBE, I"
  ]
  node
  [
    id 1024
    label "MARODI, M"
  ]
  node
  [
    id 1025
    label "DOVIDIO, F"
  ]
  node
  [
    id 1026
    label "MARRO, J"
  ]
  node
  [
    id 1027
    label "DICKMAN, R"
  ]
  node
  [
    id 1028
    label "MARTIN, R"
  ]
  node
  [
    id 1029
    label "ANDRAS, P"
  ]
  node
  [
    id 1030
    label "ZALIZNYAK, A"
  ]
  node
  [
    id 1031
    label "MASOLLER, C"
  ]
  node
  [
    id 1032
    label "MARTI, A"
  ]
  node
  [
    id 1033
    label "MASSUNAGA, M"
  ]
  node
  [
    id 1034
    label "BAHIANA, M"
  ]
  node
  [
    id 1035
    label "MASUDA, N"
  ]
  node
  [
    id 1036
    label "AIHARA, K"
  ]
  node
  [
    id 1037
    label "MIWA, H"
  ]
  node
  [
    id 1038
    label "KONNO, N"
  ]
  node
  [
    id 1039
    label "MATTHEWS, P"
  ]
  node
  [
    id 1040
    label "MIROLLO, R"
  ]
  node
  [
    id 1041
    label "VALLONE, A"
  ]
  node
  [
    id 1042
    label "MCCANN, K"
  ]
  node
  [
    id 1043
    label "HASTINGS, A"
  ]
  node
  [
    id 1044
    label "HUXEL, G"
  ]
  node
  [
    id 1045
    label "MCGRAW, P"
  ]
  node
  [
    id 1046
    label "MEESTER, R"
  ]
  node
  [
    id 1047
    label "MEHRING, C"
  ]
  node
  [
    id 1048
    label "HEHL, U"
  ]
  node
  [
    id 1049
    label "KUBO, M"
  ]
  node
  [
    id 1050
    label "DIESMANN, M"
  ]
  node
  [
    id 1051
    label "MEHTA, M"
  ]
  node
  [
    id 1052
    label "MELIN, G"
  ]
  node
  [
    id 1053
    label "PERSSON, O"
  ]
  node
  [
    id 1054
    label "MENCZER, F"
  ]
  node
  [
    id 1055
    label "BELEW, R"
  ]
  node
  [
    id 1056
    label "PANT, G"
  ]
  node
  [
    id 1057
    label "RUIZ, M"
  ]
  node
  [
    id 1058
    label "SRINIVASAN, P"
  ]
  node
  [
    id 1059
    label "MERTON, R"
  ]
  node
  [
    id 1060
    label "MEWES, H"
  ]
  node
  [
    id 1061
    label "FRISHMAN, D"
  ]
  node
  [
    id 1062
    label "GULDENER, U"
  ]
  node
  [
    id 1063
    label "MANNHAUPT, G"
  ]
  node
  [
    id 1064
    label "MAYER, K"
  ]
  node
  [
    id 1065
    label "MOKREJS, M"
  ]
  node
  [
    id 1066
    label "MORGENSTERN, B"
  ]
  node
  [
    id 1067
    label "MUNSTERKOTTER, M"
  ]
  node
  [
    id 1068
    label "RUDD, S"
  ]
  node
  [
    id 1069
    label "WEIL, B"
  ]
  node
  [
    id 1070
    label "LEVITT, R"
  ]
  node
  [
    id 1071
    label "SHENORR, S"
  ]
  node
  [
    id 1072
    label "AYZENSHTAT, I"
  ]
  node
  [
    id 1073
    label "SHEFFER, M"
  ]
  node
  [
    id 1074
    label "LEVY, W"
  ]
  node
  [
    id 1075
    label "MITCHELL, M"
  ]
  node
  [
    id 1076
    label "MIZRUCHI, M"
  ]
  node
  [
    id 1077
    label "MOHAR, B"
  ]
  node
  [
    id 1078
    label "MOLLOY, M"
  ]
  node
  [
    id 1079
    label "REED, B"
  ]
  node
  [
    id 1080
    label "MONASSON, R"
  ]
  node
  [
    id 1081
    label "MONTOYA, J"
  ]
  node
  [
    id 1082
    label "MOREIRA, A"
  ]
  node
  [
    id 1083
    label "ANDRADE, J"
  ]
  node
  [
    id 1084
    label "MORELLI, L"
  ]
  node
  [
    id 1085
    label "MORENO, J"
  ]
  node
  [
    id 1086
    label "GOMEZ, J"
  ]
  node
  [
    id 1087
    label "PACHECO, A"
  ]
  node
  [
    id 1088
    label "NEKOVEE, M"
  ]
  node
  [
    id 1089
    label "VAZQUEZPRADA, M"
  ]
  node
  [
    id 1090
    label "MORRIS, M"
  ]
  node
  [
    id 1091
    label "DASGUPTA, P"
  ]
  node
  [
    id 1092
    label "NISHIKAWA, T"
  ]
  node
  [
    id 1093
    label "MROWKA, R"
  ]
  node
  [
    id 1094
    label "PATZAK, A"
  ]
  node
  [
    id 1095
    label "HERZEL, H"
  ]
  node
  [
    id 1096
    label "HOLSTE, D"
  ]
  node
  [
    id 1097
    label "MULLER, J"
  ]
  node
  [
    id 1098
    label "SCHONFISCH, B"
  ]
  node
  [
    id 1099
    label "KIRKILIONIS, M"
  ]
  node
  [
    id 1100
    label "MURRAY, J"
  ]
  node
  [
    id 1101
    label "NAGUMO, J"
  ]
  node
  [
    id 1102
    label "ARIMOTO, S"
  ]
  node
  [
    id 1103
    label "YOSHIZAWA, S"
  ]
  node
  [
    id 1104
    label "NAKAMURA, I"
  ]
  node
  [
    id 1105
    label "NEIMAN, A"
  ]
  node
  [
    id 1106
    label "PEI, X"
  ]
  node
  [
    id 1107
    label "RUSSELL, D"
  ]
  node
  [
    id 1108
    label "WOJTENEK, W"
  ]
  node
  [
    id 1109
    label "WILKENS, L"
  ]
  node
  [
    id 1110
    label "MOSS, F"
  ]
  node
  [
    id 1111
    label "BRAUN, H"
  ]
  node
  [
    id 1112
    label "HUBER, M"
  ]
  node
  [
    id 1113
    label "VOIGT, K"
  ]
  node
  [
    id 1114
    label "NEMETH, G"
  ]
  node
  [
    id 1115
    label "VATTAY, G"
  ]
  node
  [
    id 1116
    label "NETOFF, T"
  ]
  node
  [
    id 1117
    label "CLEWLEY, R"
  ]
  node
  [
    id 1118
    label "ARNO, S"
  ]
  node
  [
    id 1119
    label "KECK, T"
  ]
  node
  [
    id 1120
    label "WHITE, J"
  ]
  node
  [
    id 1121
    label "FORREST, S"
  ]
  node
  [
    id 1122
    label "BALTHROP, J"
  ]
  node
  [
    id 1123
    label "LEICHT, E"
  ]
  node
  [
    id 1124
    label "NIEBUR, E"
  ]
  node
  [
    id 1125
    label "KAMMEN, D"
  ]
  node
  [
    id 1126
    label "NIEMINEN, J"
  ]
  node
  [
    id 1127
    label "NOH, J"
  ]
  node
  [
    id 1128
    label "RIEGER, H"
  ]
  node
  [
    id 1129
    label "SIGMUND, K"
  ]
  node
  [
    id 1130
    label "RHO, K"
  ]
  node
  [
    id 1131
    label "OHIRA, T"
  ]
  node
  [
    id 1132
    label "SAWATARI, R"
  ]
  node
  [
    id 1133
    label "OKANE, D"
  ]
  node
  [
    id 1134
    label "TREVES, A"
  ]
  node
  [
    id 1135
    label "ONNELA, J"
  ]
  node
  [
    id 1136
    label "CHAKRABORTI, A"
  ]
  node
  [
    id 1137
    label "KANTO, A"
  ]
  node
  [
    id 1138
    label "JARISARAMAKI, J"
  ]
  node
  [
    id 1139
    label "ONODY, R"
  ]
  node
  [
    id 1140
    label "DECASTRO, P"
  ]
  node
  [
    id 1141
    label "OOSAWA, C"
  ]
  node
  [
    id 1142
    label "SAVAGEAU, M"
  ]
  node
  [
    id 1143
    label "ORAM, A"
  ]
  node
  [
    id 1144
    label "OSBORNE, M"
  ]
  node
  [
    id 1145
    label "ROSENBLUM, M"
  ]
  node
  [
    id 1146
    label "OTSUKA, K"
  ]
  node
  [
    id 1147
    label "KAWAI, R"
  ]
  node
  [
    id 1148
    label "HWONG, S"
  ]
  node
  [
    id 1149
    label "KO, J"
  ]
  node
  [
    id 1150
    label "CHERN, J"
  ]
  node
  [
    id 1151
    label "OVERBAY, T"
  ]
  node
  [
    id 1152
    label "OVERBEEK, R"
  ]
  node
  [
    id 1153
    label "LARSEN, N"
  ]
  node
  [
    id 1154
    label "PUSCH, G"
  ]
  node
  [
    id 1155
    label "DSOUZA, M"
  ]
  node
  [
    id 1156
    label "SELKOVJR, E"
  ]
  node
  [
    id 1157
    label "KYRPIDES, N"
  ]
  node
  [
    id 1158
    label "FONSTEIN, M"
  ]
  node
  [
    id 1159
    label "MALTSEV, N"
  ]
  node
  [
    id 1160
    label "SELKOV, E"
  ]
  node
  [
    id 1161
    label "OZANA, M"
  ]
  node
  [
    id 1162
    label "BASSLER, K"
  ]
  node
  [
    id 1163
    label "CORRAL, A"
  ]
  node
  [
    id 1164
    label "PADGETT, J"
  ]
  node
  [
    id 1165
    label "ANSELL, C"
  ]
  node
  [
    id 1166
    label "MOTWANI, R"
  ]
  node
  [
    id 1167
    label "WINOGRAD, T"
  ]
  node
  [
    id 1168
    label "PANDEY, A"
  ]
  node
  [
    id 1169
    label "MANN, M"
  ]
  node
  [
    id 1170
    label "PANDIT, S"
  ]
  node
  [
    id 1171
    label "PANDYA, R"
  ]
  node
  [
    id 1172
    label "PARK, J"
  ]
  node
  [
    id 1173
    label "PARMANANDA, P"
  ]
  node
  [
    id 1174
    label "PASEMANN, F"
  ]
  node
  [
    id 1175
    label "PASSINGHAM, R"
  ]
  node
  [
    id 1176
    label "STHEPAN, K"
  ]
  node
  [
    id 1177
    label "RUBI, M"
  ]
  node
  [
    id 1178
    label "SMITH, E"
  ]
  node
  [
    id 1179
    label "PEKALSKI, A"
  ]
  node
  [
    id 1180
    label "PENNOCK, D"
  ]
  node
  [
    id 1181
    label "GLOVER, E"
  ]
  node
  [
    id 1182
    label "PETERMANNN, T"
  ]
  node
  [
    id 1183
    label "PIMM, S"
  ]
  node
  [
    id 1184
    label "PINTO, S"
  ]
  node
  [
    id 1185
    label "LOPES, S"
  ]
  node
  [
    id 1186
    label "VIANA, R"
  ]
  node
  [
    id 1187
    label "PIOT, P"
  ]
  node
  [
    id 1188
    label "PITTS, F"
  ]
  node
  [
    id 1189
    label "PLUCHINO, A"
  ]
  node
  [
    id 1190
    label "PODANI, J"
  ]
  node
  [
    id 1191
    label "SZATHMARY, E"
  ]
  node
  [
    id 1192
    label "POLIS, G"
  ]
  node
  [
    id 1193
    label "POOL, I"
  ]
  node
  [
    id 1194
    label "KOCHEN, M"
  ]
  node
  [
    id 1195
    label "PORTER, M"
  ]
  node
  [
    id 1196
    label "MUCHA, P"
  ]
  node
  [
    id 1197
    label "WARMBRAND, C"
  ]
  node
  [
    id 1198
    label "POTHEN, A"
  ]
  node
  [
    id 1199
    label "SIMON, H"
  ]
  node
  [
    id 1200
    label "LIOU, K"
  ]
  node
  [
    id 1201
    label "ROTHENBERG, R"
  ]
  node
  [
    id 1202
    label "ZIMMERMANROGER, H"
  ]
  node
  [
    id 1203
    label "GREEN, D"
  ]
  node
  [
    id 1204
    label "TAYLOR, J"
  ]
  node
  [
    id 1205
    label "BONNEY, M"
  ]
  node
  [
    id 1206
    label "PHILLIPSPLUMMER, L"
  ]
  node
  [
    id 1207
    label "MALDONADOLONG, T"
  ]
  node
  [
    id 1208
    label "ZIMMERMAN, H"
  ]
  node
  [
    id 1209
    label "POWELL, W"
  ]
  node
  [
    id 1210
    label "WHITE, D"
  ]
  node
  [
    id 1211
    label "KOPUT, K"
  ]
  node
  [
    id 1212
    label "OWENSMITH, J"
  ]
  node
  [
    id 1213
    label "PRICE, D"
  ]
  node
  [
    id 1214
    label "RADICCHI, F"
  ]
  node
  [
    id 1215
    label "CECCONI, F"
  ]
  node
  [
    id 1216
    label "LORETO, V"
  ]
  node
  [
    id 1217
    label "PARISI, D"
  ]
  node
  [
    id 1218
    label "RAGHAVACHARI, S"
  ]
  node
  [
    id 1219
    label "GLAZIER, J"
  ]
  node
  [
    id 1220
    label "RAIN, J"
  ]
  node
  [
    id 1221
    label "RAMASCO, J"
  ]
  node
  [
    id 1222
    label "RAMEZANPOUR, A"
  ]
  node
  [
    id 1223
    label "KARIMIPOUR, V"
  ]
  node
  [
    id 1224
    label "MASHAGHI, A"
  ]
  node
  [
    id 1225
    label "RAPOPORT, A"
  ]
  node
  [
    id 1226
    label "CHAMMAH, A"
  ]
  node
  [
    id 1227
    label "HORVATH, W"
  ]
  node
  [
    id 1228
    label "SOMERA, A"
  ]
  node
  [
    id 1229
    label "MONGRU, D"
  ]
  node
  [
    id 1230
    label "REICHARDT, J"
  ]
  node
  [
    id 1231
    label "RESNICK, P"
  ]
  node
  [
    id 1232
    label "VARIAN, H"
  ]
  node
  [
    id 1233
    label "RESS, G"
  ]
  node
  [
    id 1234
    label "KREIMAN, G"
  ]
  node
  [
    id 1235
    label "RESTREPO, J"
  ]
  node
  [
    id 1236
    label "HUNT, B"
  ]
  node
  [
    id 1237
    label "RIVES, A"
  ]
  node
  [
    id 1238
    label "GALITSKI, T"
  ]
  node
  [
    id 1239
    label "DARBYDOWMAN, K"
  ]
  node
  [
    id 1240
    label "ROETHLISBERGER, F"
  ]
  node
  [
    id 1241
    label "DICKSON, W"
  ]
  node
  [
    id 1242
    label "ROGERS, J"
  ]
  node
  [
    id 1243
    label "WILLE, L"
  ]
  node
  [
    id 1244
    label "ROGISTER, F"
  ]
  node
  [
    id 1245
    label "THORNBURG, K"
  ]
  node
  [
    id 1246
    label "FABINY, L"
  ]
  node
  [
    id 1247
    label "MOLLER, M"
  ]
  node
  [
    id 1248
    label "ROMANO, S"
  ]
  node
  [
    id 1249
    label "EGUIA, M"
  ]
  node
  [
    id 1250
    label "ROSA, E"
  ]
  node
  [
    id 1251
    label "HESS, M"
  ]
  node
  [
    id 1252
    label "ROSATO, V"
  ]
  node
  [
    id 1253
    label "BOLOGNA, S"
  ]
  node
  [
    id 1254
    label "TIRITICCO, F"
  ]
  node
  [
    id 1255
    label "ROSVALL, M"
  ]
  node
  [
    id 1256
    label "BALDWIN, J"
  ]
  node
  [
    id 1257
    label "TROTTER, R"
  ]
  node
  [
    id 1258
    label "ROUGEMONT, J"
  ]
  node
  [
    id 1259
    label "HINGAMP, P"
  ]
  node
  [
    id 1260
    label "ROXIN, A"
  ]
  node
  [
    id 1261
    label "RIECKE, H"
  ]
  node
  [
    id 1262
    label "SOLLA, S"
  ]
  node
  [
    id 1263
    label "ROZENFELD, A"
  ]
  node
  [
    id 1264
    label "RULKOV, N"
  ]
  node
  [
    id 1265
    label "SUSHCHIK, M"
  ]
  node
  [
    id 1266
    label "TSIMRING, L"
  ]
  node
  [
    id 1267
    label "ABARBANEL, H"
  ]
  node
  [
    id 1268
    label "GOMEZ, S"
  ]
  node
  [
    id 1269
    label "SABIDUSSI, G"
  ]
  node
  [
    id 1270
    label "SACHTJEN, M"
  ]
  node
  [
    id 1271
    label "SAKAGUCHI, H"
  ]
  node
  [
    id 1272
    label "SHINOMOTO, S"
  ]
  node
  [
    id 1273
    label "SANDER, L"
  ]
  node
  [
    id 1274
    label "WARREN, C"
  ]
  node
  [
    id 1275
    label "SIMON, C"
  ]
  node
  [
    id 1276
    label "KOOPMAN, J"
  ]
  node
  [
    id 1277
    label "SATOR, N"
  ]
  node
  [
    id 1278
    label "BLACKMORE, C"
  ]
  node
  [
    id 1279
    label "GRANT, S"
  ]
  node
  [
    id 1280
    label "PAYNE, B"
  ]
  node
  [
    id 1281
    label "BADDELEY, R"
  ]
  node
  [
    id 1282
    label "SCHAFER, C"
  ]
  node
  [
    id 1283
    label "ABEL, H"
  ]
  node
  [
    id 1284
    label "SCHELLING, T"
  ]
  node
  [
    id 1285
    label "SCHNEEBERGER, A"
  ]
  node
  [
    id 1286
    label "SCHUSTER, S"
  ]
  node
  [
    id 1287
    label "PFEIFFER, T"
  ]
  node
  [
    id 1288
    label "MOLDENHAUER, F"
  ]
  node
  [
    id 1289
    label "KOCH, I"
  ]
  node
  [
    id 1290
    label "DANDEKAR, T"
  ]
  node
  [
    id 1291
    label "SCHUZ, A"
  ]
  node
  [
    id 1292
    label "SCHWARTZ, I"
  ]
  node
  [
    id 1293
    label "BILLINGS, L"
  ]
  node
  [
    id 1294
    label "BOLLT, E"
  ]
  node
  [
    id 1295
    label "SCHWARTZ, N"
  ]
  node
  [
    id 1296
    label "SCOTT, J"
  ]
  node
  [
    id 1297
    label "SEARLS, D"
  ]
  node
  [
    id 1298
    label "SEARY, A"
  ]
  node
  [
    id 1299
    label "RICHARDS, W"
  ]
  node
  [
    id 1300
    label "SEDGEWICK, R"
  ]
  node
  [
    id 1301
    label "SEGLEN, P"
  ]
  node
  [
    id 1302
    label "SEIDMAN, S"
  ]
  node
  [
    id 1303
    label "BANERJEE, K"
  ]
  node
  [
    id 1304
    label "BISWAS, T"
  ]
  node
  [
    id 1305
    label "CHAKRABARTI, B"
  ]
  node
  [
    id 1306
    label "DASGUPTA, S"
  ]
  node
  [
    id 1307
    label "CHATTERJEE, A"
  ]
  node
  [
    id 1308
    label "SREERAM, P"
  ]
  node
  [
    id 1309
    label "MUKHERJEE, G"
  ]
  node
  [
    id 1310
    label "SHARDANAND, U"
  ]
  node
  [
    id 1311
    label "MAES, P"
  ]
  node
  [
    id 1312
    label "SHEFI, O"
  ]
  node
  [
    id 1313
    label "GOLDING, I"
  ]
  node
  [
    id 1314
    label "SEGEV, R"
  ]
  node
  [
    id 1315
    label "BENJACOB, E"
  ]
  node
  [
    id 1316
    label "AYALI, A"
  ]
  node
  [
    id 1317
    label "SHEPARD, R"
  ]
  node
  [
    id 1318
    label "SHERRINGTON, D"
  ]
  node
  [
    id 1319
    label "SHOCKLEY, W"
  ]
  node
  [
    id 1320
    label "SHUAI, J"
  ]
  node
  [
    id 1321
    label "DURAND, D"
  ]
  node
  [
    id 1322
    label "SIGMAN, M"
  ]
  node
  [
    id 1323
    label "SIMARD, D"
  ]
  node
  [
    id 1324
    label "NADEAU, L"
  ]
  node
  [
    id 1325
    label "KROGER, H"
  ]
  node
  [
    id 1326
    label "SINGH, B"
  ]
  node
  [
    id 1327
    label "GUPTE, N"
  ]
  node
  [
    id 1328
    label "SMITH, D"
  ]
  node
  [
    id 1329
    label "TIMBERLAKE, M"
  ]
  node
  [
    id 1330
    label "SMITH, R"
  ]
  node
  [
    id 1331
    label "SNEL, B"
  ]
  node
  [
    id 1332
    label "BORK, P"
  ]
  node
  [
    id 1333
    label "HUYNEN, M"
  ]
  node
  [
    id 1334
    label "SNIJDERS, T"
  ]
  node
  [
    id 1335
    label "SOARES, D"
  ]
  node
  [
    id 1336
    label "TSALLIS, C"
  ]
  node
  [
    id 1337
    label "MARIZ, A"
  ]
  node
  [
    id 1338
    label "DASILVA, L"
  ]
  node
  [
    id 1339
    label "SOCOLAR, J"
  ]
  node
  [
    id 1340
    label "SODERBERG, B"
  ]
  node
  [
    id 1341
    label "SOFFER, S"
  ]
  node
  [
    id 1342
    label "KEPLER, T"
  ]
  node
  [
    id 1343
    label "SALAZARCIUDAD, I"
  ]
  node
  [
    id 1344
    label "GARCIAFERNANDEZ, J"
  ]
  node
  [
    id 1345
    label "SOLOMONOFF, R"
  ]
  node
  [
    id 1346
    label "CRISANTI, A"
  ]
  node
  [
    id 1347
    label "SONG, C"
  ]
  node
  [
    id 1348
    label "MAKSE, H"
  ]
  node
  [
    id 1349
    label "SONG, S"
  ]
  node
  [
    id 1350
    label "SJOSTROM, P"
  ]
  node
  [
    id 1351
    label "REIGL, M"
  ]
  node
  [
    id 1352
    label "NELSON, S"
  ]
  node
  [
    id 1353
    label "SOTELO, C"
  ]
  node
  [
    id 1354
    label "SPIRIN, V"
  ]
  node
  [
    id 1355
    label "MIRNY, L"
  ]
  node
  [
    id 1356
    label "SPORNS, O"
  ]
  node
  [
    id 1357
    label "TONONI, G"
  ]
  node
  [
    id 1358
    label "EDELMAN, G"
  ]
  node
  [
    id 1359
    label "ZWI, J"
  ]
  node
  [
    id 1360
    label "STAM, C"
  ]
  node
  [
    id 1361
    label "AHARONY, A"
  ]
  node
  [
    id 1362
    label "ADLER, J"
  ]
  node
  [
    id 1363
    label "MEYERORTMANNS, H"
  ]
  node
  [
    id 1364
    label "STELLING, J"
  ]
  node
  [
    id 1365
    label "KLAMT, S"
  ]
  node
  [
    id 1366
    label "BETTENBROCK, K"
  ]
  node
  [
    id 1367
    label "GILLES, E"
  ]
  node
  [
    id 1368
    label "KAMPER, L"
  ]
  node
  [
    id 1369
    label "BOZKURT, A"
  ]
  node
  [
    id 1370
    label "STEPHENSON, K"
  ]
  node
  [
    id 1371
    label "ZELEN, M"
  ]
  node
  [
    id 1372
    label "STEYVERS, M"
  ]
  node
  [
    id 1373
    label "TENENBAUM, J"
  ]
  node
  [
    id 1374
    label "STILLER, J"
  ]
  node
  [
    id 1375
    label "NETTLE, D"
  ]
  node
  [
    id 1376
    label "DUNBAR, R"
  ]
  node
  [
    id 1377
    label "STILWELL, D"
  ]
  node
  [
    id 1378
    label "ROBERSON, D"
  ]
  node
  [
    id 1379
    label "STONEHAM, A"
  ]
  node
  [
    id 1380
    label "STUART, J"
  ]
  node
  [
    id 1381
    label "SUCHECKI, K"
  ]
  node
  [
    id 1382
    label "SVENSON, P"
  ]
  node
  [
    id 1383
    label "SWEDBERG, R"
  ]
  node
  [
    id 1384
    label "SZABO, G"
  ]
  node
  [
    id 1385
    label "ALAVA, M"
  ]
  node
  [
    id 1386
    label "SZNAJDWERON, K"
  ]
  node
  [
    id 1387
    label "SZNAJD, J"
  ]
  node
  [
    id 1388
    label "SZYMANSKI, J"
  ]
  node
  [
    id 1389
    label "THURNER, S"
  ]
  node
  [
    id 1390
    label "TAKAYASU, M"
  ]
  node
  [
    id 1391
    label "TAKAYASU, H"
  ]
  node
  [
    id 1392
    label "SATO, T"
  ]
  node
  [
    id 1393
    label "TANAKA, R"
  ]
  node
  [
    id 1394
    label "TASS, P"
  ]
  node
  [
    id 1395
    label "WEULE, M"
  ]
  node
  [
    id 1396
    label "VOLKMANN, J"
  ]
  node
  [
    id 1397
    label "FREUND, H"
  ]
  node
  [
    id 1398
    label "TERMAN, D"
  ]
  node
  [
    id 1399
    label "TICOS, C"
  ]
  node
  [
    id 1400
    label "ROSAJR, E"
  ]
  node
  [
    id 1401
    label "PARDO, W"
  ]
  node
  [
    id 1402
    label "WALKENSTEIN, J"
  ]
  node
  [
    id 1403
    label "MONTI, M"
  ]
  node
  [
    id 1404
    label "TIERI, P"
  ]
  node
  [
    id 1405
    label "VALENSIN, S"
  ]
  node
  [
    id 1406
    label "CASTELLANI, G"
  ]
  node
  [
    id 1407
    label "REMONDINI, D"
  ]
  node
  [
    id 1408
    label "FRANCESCHI, C"
  ]
  node
  [
    id 1409
    label "TIMME, M"
  ]
  node
  [
    id 1410
    label "WOLF, F"
  ]
  node
  [
    id 1411
    label "MCINTOSH, A"
  ]
  node
  [
    id 1412
    label "TORNOW, S"
  ]
  node
  [
    id 1413
    label "KOZMA, B"
  ]
  node
  [
    id 1414
    label "HENGARTNER, N"
  ]
  node
  [
    id 1415
    label "KORNISS, G"
  ]
  node
  [
    id 1416
    label "TORRES, J"
  ]
  node
  [
    id 1417
    label "GARRIDO, P"
  ]
  node
  [
    id 1418
    label "TRAVERS, J"
  ]
  node
  [
    id 1419
    label "DEALBUQUERQUE, M"
  ]
  node
  [
    id 1420
    label "TSODYKS, M"
  ]
  node
  [
    id 1421
    label "KENET, T"
  ]
  node
  [
    id 1422
    label "GRINVALD, A"
  ]
  node
  [
    id 1423
    label "ARIELI, A"
  ]
  node
  [
    id 1424
    label "TYLER, J"
  ]
  node
  [
    id 1425
    label "WILKINSON, D"
  ]
  node
  [
    id 1426
    label "TYSON, J"
  ]
  node
  [
    id 1427
    label "CSIKASZNAGE, A"
  ]
  node
  [
    id 1428
    label "NOVAK, B"
  ]
  node
  [
    id 1429
    label "UETZ, P"
  ]
  node
  [
    id 1430
    label "CAGNEY, G"
  ]
  node
  [
    id 1431
    label "MANSFIELD, T"
  ]
  node
  [
    id 1432
    label "JUDSON, R"
  ]
  node
  [
    id 1433
    label "KNIGHT, J"
  ]
  node
  [
    id 1434
    label "LOCKSHON, D"
  ]
  node
  [
    id 1435
    label "NARAYAN, V"
  ]
  node
  [
    id 1436
    label "SRINIVASAN, M"
  ]
  node
  [
    id 1437
    label "POCHART, P"
  ]
  node
  [
    id 1438
    label "QURESHIEMILI, A"
  ]
  node
  [
    id 1439
    label "LI, Y"
  ]
  node
  [
    id 1440
    label "GODWIN, B"
  ]
  node
  [
    id 1441
    label "CONOVER, D"
  ]
  node
  [
    id 1442
    label "KALBFLEISCH, T"
  ]
  node
  [
    id 1443
    label "VIJAYADAMODAR, G"
  ]
  node
  [
    id 1444
    label "YANG, M"
  ]
  node
  [
    id 1445
    label "JOHNSTON, M"
  ]
  node
  [
    id 1446
    label "FIELDS, S"
  ]
  node
  [
    id 1447
    label "ROTHBERG, J"
  ]
  node
  [
    id 1448
    label "GLOT, L"
  ]
  node
  [
    id 1449
    label "VALENTE, T"
  ]
  node
  [
    id 1450
    label "FOREMAN, R"
  ]
  node
  [
    id 1451
    label "CANCHO, R"
  ]
  node
  [
    id 1452
    label "VANNUCCHI, F"
  ]
  node
  [
    id 1453
    label "VANPUTTEN, M"
  ]
  node
  [
    id 1454
    label "VANVREESWIJK, C"
  ]
  node
  [
    id 1455
    label "VANWIGGEREN, G"
  ]
  node
  [
    id 1456
    label "VARELA, F"
  ]
  node
  [
    id 1457
    label "LACHAUX, J"
  ]
  node
  [
    id 1458
    label "RODRIGUEZ, E"
  ]
  node
  [
    id 1459
    label "MARTINERIE, J"
  ]
  node
  [
    id 1460
    label "FLAMMINI, A"
  ]
  node
  [
    id 1461
    label "VAZQUEZ, F"
  ]
  node
  [
    id 1462
    label "VENKATESH, S"
  ]
  node
  [
    id 1463
    label "VERDASCA, J"
  ]
  node
  [
    id 1464
    label "VEZOLI, J"
  ]
  node
  [
    id 1465
    label "FALCHIER, A"
  ]
  node
  [
    id 1466
    label "KNOBLAUCH, K"
  ]
  node
  [
    id 1467
    label "KENNEDY, H"
  ]
  node
  [
    id 1468
    label "CZIROK, A"
  ]
  node
  [
    id 1469
    label "COHEN, I"
  ]
  node
  [
    id 1470
    label "SHOCHET, O"
  ]
  node
  [
    id 1471
    label "VOGELSTEIN, B"
  ]
  node
  [
    id 1472
    label "LANE, D"
  ]
  node
  [
    id 1473
    label "LEVINE, A"
  ]
  node
  [
    id 1474
    label "VOGELS, W"
  ]
  node
  [
    id 1475
    label "VANRENESSE, R"
  ]
  node
  [
    id 1476
    label "BIRMAN, K"
  ]
  node
  [
    id 1477
    label "VOLCHENKOV, D"
  ]
  node
  [
    id 1478
    label "VOLCHENKOVA, L"
  ]
  node
  [
    id 1479
    label "VONNEUMANN, J"
  ]
  node
  [
    id 1480
    label "MORGENSTERN, O"
  ]
  node
  [
    id 1481
    label "VRAGOVIC, I"
  ]
  node
  [
    id 1482
    label "LOUIS, E"
  ]
  node
  [
    id 1483
    label "VUKADINOVIC, D"
  ]
  node
  [
    id 1484
    label "HUANG, P"
  ]
  node
  [
    id 1485
    label "ERLEBACH, T"
  ]
  node
  [
    id 1486
    label "VUKMIROVIC, O"
  ]
  node
  [
    id 1487
    label "TILGHMAN, S"
  ]
  node
  [
    id 1488
    label "WALL, M"
  ]
  node
  [
    id 1489
    label "HIAVACEK, W"
  ]
  node
  [
    id 1490
    label "WALSH, T"
  ]
  node
  [
    id 1491
    label "WANG, B"
  ]
  node
  [
    id 1492
    label "ZHANG, F"
  ]
  node
  [
    id 1493
    label "WANG, J"
  ]
  node
  [
    id 1494
    label "DEWILDE, P"
  ]
  node
  [
    id 1495
    label "WANG, S"
  ]
  node
  [
    id 1496
    label "ZHANG, C"
  ]
  node
  [
    id 1497
    label "XU, J"
  ]
  node
  [
    id 1498
    label "PATTISON, P"
  ]
  node
  [
    id 1499
    label "WAXMAN, B"
  ]
  node
  [
    id 1500
    label "WEEKS, M"
  ]
  node
  [
    id 1501
    label "CLAIR, S"
  ]
  node
  [
    id 1502
    label "RADDA, K"
  ]
  node
  [
    id 1503
    label "SCHENSUL, J"
  ]
  node
  [
    id 1504
    label "WELLMAN, B"
  ]
  node
  [
    id 1505
    label "SALAFF, J"
  ]
  node
  [
    id 1506
    label "DIMITROVA, D"
  ]
  node
  [
    id 1507
    label "GARTON, L"
  ]
  node
  [
    id 1508
    label "GULIA, M"
  ]
  node
  [
    id 1509
    label "HAYTHORNTHWAITE, C"
  ]
  node
  [
    id 1510
    label "WEST, D"
  ]
  node
  [
    id 1511
    label "WEST, G"
  ]
  node
  [
    id 1512
    label "BROWN, J"
  ]
  node
  [
    id 1513
    label "ENQUIST, B"
  ]
  node
  [
    id 1514
    label "NAZER, N"
  ]
  node
  [
    id 1515
    label "SOUTHGATE, E"
  ]
  node
  [
    id 1516
    label "THOMPSON, J"
  ]
  node
  [
    id 1517
    label "BRENNER, S"
  ]
  node
  [
    id 1518
    label "WHITTINGTON, M"
  ]
  node
  [
    id 1519
    label "TRAUB, R"
  ]
  node
  [
    id 1520
    label "BUHL, E"
  ]
  node
  [
    id 1521
    label "WINFREE, A"
  ]
  node
  [
    id 1522
    label "WINFUL, H"
  ]
  node
  [
    id 1523
    label "RAHMAN, L"
  ]
  node
  [
    id 1524
    label "WOLFRAM, S"
  ]
  node
  [
    id 1525
    label "WOOD, A"
  ]
  node
  [
    id 1526
    label "WOLLENBERG, B"
  ]
  node
  [
    id 1527
    label "WOOLF, M"
  ]
  node
  [
    id 1528
    label "WORMALD, N"
  ]
  node
  [
    id 1529
    label "WUCHTY, S"
  ]
  node
  [
    id 1530
    label "WU, C"
  ]
  node
  [
    id 1531
    label "CHUA, L"
  ]
  node
  [
    id 1532
    label "WU, F"
  ]
  node
  [
    id 1533
    label "RICE, D"
  ]
  node
  [
    id 1534
    label "SALWINSKI, L"
  ]
  node
  [
    id 1535
    label "BARON, M"
  ]
  node
  [
    id 1536
    label "XULVIBRUNET, R"
  ]
  node
  [
    id 1537
    label "YANG, K"
  ]
  node
  [
    id 1538
    label "HUANG, L"
  ]
  node
  [
    id 1539
    label "YANG, L"
  ]
  node
  [
    id 1540
    label "YAN, G"
  ]
  node
  [
    id 1541
    label "ZHOU, T"
  ]
  node
  [
    id 1542
    label "FU, Z"
  ]
  node
  [
    id 1543
    label "YAOUM, Y"
  ]
  node
  [
    id 1544
    label "LAUMANN, E"
  ]
  node
  [
    id 1545
    label "YEHIA, A"
  ]
  node
  [
    id 1546
    label "JEANDUPREUX, D"
  ]
  node
  [
    id 1547
    label "ALONSO, F"
  ]
  node
  [
    id 1548
    label "GUEVARA, M"
  ]
  node
  [
    id 1549
    label "YEUNG, M"
  ]
  node
  [
    id 1550
    label "YOOK, S"
  ]
  node
  [
    id 1551
    label "TU, Y"
  ]
  node
  [
    id 1552
    label "YOUNG, H"
  ]
  node
  [
    id 1553
    label "SAGER, J"
  ]
  node
  [
    id 1554
    label "CSARDI, G"
  ]
  node
  [
    id 1555
    label "HAGA, P"
  ]
  node
  [
    id 1556
    label "YUSONG, T"
  ]
  node
  [
    id 1557
    label "LINGJIANG, K"
  ]
  node
  [
    id 1558
    label "MUREN, L"
  ]
  node
  [
    id 1559
    label "ZACHARY, W"
  ]
  node
  [
    id 1560
    label "ZAKS, M"
  ]
  node
  [
    id 1561
    label "PARK, E"
  ]
  node
  [
    id 1562
    label "ZASLAVER, A"
  ]
  node
  [
    id 1563
    label "MAYO, A"
  ]
  node
  [
    id 1564
    label "ROSENBERG, R"
  ]
  node
  [
    id 1565
    label "BASHKIN, P"
  ]
  node
  [
    id 1566
    label "SBERRO, H"
  ]
  node
  [
    id 1567
    label "TSALYUK, M"
  ]
  node
  [
    id 1568
    label "ZEKRI, N"
  ]
  node
  [
    id 1569
    label "CLERC, J"
  ]
  node
  [
    id 1570
    label "CERDEIRA, H"
  ]
  node
  [
    id 1571
    label "CHEN, S"
  ]
  node
  [
    id 1572
    label "BRAUN, T"
  ]
  node
  [
    id 1573
    label "YAO, Y"
  ]
  node
  [
    id 1574
    label "ZHAN, M"
  ]
  node
  [
    id 1575
    label "ZHENG, D"
  ]
  node
  [
    id 1576
    label "TRIMPER, S"
  ]
  node
  [
    id 1577
    label "ZHENG, B"
  ]
  node
  [
    id 1578
    label "HUI, P"
  ]
  node
  [
    id 1579
    label "ZHENG, Z"
  ]
  node
  [
    id 1580
    label "ZHONGBAO, K"
  ]
  node
  [
    id 1581
    label "CHANGSHUI, Z"
  ]
  node
  [
    id 1582
    label "ZHOU, H"
  ]
  node
  [
    id 1583
    label "ZHOU, S"
  ]
  node
  [
    id 1584
    label "MONDRAGON, R"
  ]
  node
  [
    id 1585
    label "ZHU, H"
  ]
  node
  [
    id 1586
    label "HUANG, Z"
  ]
  node
  [
    id 1587
    label "ZHU, J"
  ]
  node
  [
    id 1588
    label "ZIMMERMANN, M"
  ]
  edge
  [
    source 1
    target 0
    value 2.5
  ]
  edge
  [
    source 3
    target 2
    value 0.25
  ]
  edge
  [
    source 4
    target 2
    value 0.25
  ]
  edge
  [
    source 4
    target 3
    value 0.25
  ]
  edge
  [
    source 5
    target 2
    value 0.25
  ]
  edge
  [
    source 5
    target 3
    value 0.25
  ]
  edge
  [
    source 5
    target 4
    value 0.25
  ]
  edge
  [
    source 6
    target 2
    value 0.25
  ]
  edge
  [
    source 6
    target 3
    value 0.25
  ]
  edge
  [
    source 6
    target 4
    value 0.25
  ]
  edge
  [
    source 6
    target 5
    value 0.25
  ]
  edge
  [
    source 8
    target 7
    value 1
  ]
  edge
  [
    source 9
    target 7
    value 3.16667
  ]
  edge
  [
    source 10
    target 7
    value 1.16667
  ]
  edge
  [
    source 10
    target 9
    value 1.16667
  ]
  edge
  [
    source 11
    target 7
    value 0.666667
  ]
  edge
  [
    source 11
    target 10
    value 0.666667
  ]
  edge
  [
    source 11
    target 9
    value 0.666667
  ]
  edge
  [
    source 13
    target 12
    value 0.333333
  ]
  edge
  [
    source 14
    target 12
    value 0.333333
  ]
  edge
  [
    source 14
    target 13
    value 0.333333
  ]
  edge
  [
    source 15
    target 12
    value 0.333333
  ]
  edge
  [
    source 15
    target 13
    value 0.333333
  ]
  edge
  [
    source 15
    target 14
    value 0.333333
  ]
  edge
  [
    source 17
    target 16
    value 0.5
  ]
  edge
  [
    source 18
    target 16
    value 0.5
  ]
  edge
  [
    source 18
    target 17
    value 0.5
  ]
  edge
  [
    source 21
    target 20
    value 0.5
  ]
  edge
  [
    source 22
    target 20
    value 0.5
  ]
  edge
  [
    source 22
    target 21
    value 0.5
  ]
  edge
  [
    source 24
    target 23
    value 0.5
  ]
  edge
  [
    source 25
    target 23
    value 0.5
  ]
  edge
  [
    source 25
    target 24
    value 2.33333
  ]
  edge
  [
    source 28
    target 27
    value 0.5
  ]
  edge
  [
    source 29
    target 27
    value 0.5
  ]
  edge
  [
    source 29
    target 28
    value 0.5
  ]
  edge
  [
    source 31
    target 30
    value 0.5
  ]
  edge
  [
    source 32
    target 30
    value 0.5
  ]
  edge
  [
    source 32
    target 31
    value 0.5
  ]
  edge
  [
    source 33
    target 30
    value 3.58333
  ]
  edge
  [
    source 34
    target 30
    value 1.58333
  ]
  edge
  [
    source 34
    target 33
    value 4.225
  ]
  edge
  [
    source 36
    target 35
    value 0.2
  ]
  edge
  [
    source 37
    target 35
    value 0.2
  ]
  edge
  [
    source 37
    target 36
    value 0.2
  ]
  edge
  [
    source 38
    target 35
    value 0.2
  ]
  edge
  [
    source 38
    target 36
    value 0.2
  ]
  edge
  [
    source 38
    target 37
    value 0.2
  ]
  edge
  [
    source 39
    target 35
    value 0.2
  ]
  edge
  [
    source 39
    target 36
    value 0.2
  ]
  edge
  [
    source 39
    target 37
    value 0.2
  ]
  edge
  [
    source 39
    target 38
    value 0.2
  ]
  edge
  [
    source 40
    target 35
    value 0.2
  ]
  edge
  [
    source 40
    target 36
    value 0.2
  ]
  edge
  [
    source 40
    target 37
    value 0.2
  ]
  edge
  [
    source 40
    target 38
    value 0.2
  ]
  edge
  [
    source 40
    target 39
    value 0.2
  ]
  edge
  [
    source 43
    target 42
    value 1
  ]
  edge
  [
    source 45
    target 44
    value 0.5
  ]
  edge
  [
    source 46
    target 44
    value 0.5
  ]
  edge
  [
    source 46
    target 45
    value 0.5
  ]
  edge
  [
    source 48
    target 47
    value 0.333333
  ]
  edge
  [
    source 49
    target 47
    value 0.333333
  ]
  edge
  [
    source 49
    target 48
    value 0.333333
  ]
  edge
  [
    source 50
    target 47
    value 0.333333
  ]
  edge
  [
    source 50
    target 48
    value 0.333333
  ]
  edge
  [
    source 50
    target 49
    value 0.333333
  ]
  edge
  [
    source 51
    target 33
    value 0.75
  ]
  edge
  [
    source 52
    target 51
    value 0.25
  ]
  edge
  [
    source 52
    target 33
    value 0.25
  ]
  edge
  [
    source 53
    target 51
    value 0.25
  ]
  edge
  [
    source 53
    target 52
    value 0.25
  ]
  edge
  [
    source 53
    target 33
    value 1.85833
  ]
  edge
  [
    source 53
    target 34
    value 0.775
  ]
  edge
  [
    source 54
    target 51
    value 0.25
  ]
  edge
  [
    source 54
    target 52
    value 0.25
  ]
  edge
  [
    source 54
    target 53
    value 0.625
  ]
  edge
  [
    source 54
    target 33
    value 2.99167
  ]
  edge
  [
    source 54
    target 34
    value 1.15833
  ]
  edge
  [
    source 54
    target 30
    value 0.25
  ]
  edge
  [
    source 55
    target 51
    value 0.5
  ]
  edge
  [
    source 56
    target 51
    value 0.5
  ]
  edge
  [
    source 56
    target 55
    value 3.83333
  ]
  edge
  [
    source 57
    target 51
    value 1
  ]
  edge
  [
    source 58
    target 51
    value 1
  ]
  edge
  [
    source 58
    target 57
    value 1
  ]
  edge
  [
    source 60
    target 59
    value 0.5
  ]
  edge
  [
    source 61
    target 59
    value 0.5
  ]
  edge
  [
    source 61
    target 60
    value 0.5
  ]
  edge
  [
    source 63
    target 62
    value 0.47619
  ]
  edge
  [
    source 64
    target 62
    value 0.333333
  ]
  edge
  [
    source 64
    target 63
    value 0.333333
  ]
  edge
  [
    source 65
    target 62
    value 0.333333
  ]
  edge
  [
    source 65
    target 63
    value 0.333333
  ]
  edge
  [
    source 65
    target 64
    value 0.333333
  ]
  edge
  [
    source 67
    target 66
    value 0.5
  ]
  edge
  [
    source 68
    target 66
    value 0.5
  ]
  edge
  [
    source 68
    target 67
    value 0.5
  ]
  edge
  [
    source 70
    target 69
    value 0.833333
  ]
  edge
  [
    source 71
    target 69
    value 2.16667
  ]
  edge
  [
    source 71
    target 70
    value 0.833333
  ]
  edge
  [
    source 72
    target 69
    value 0.916667
  ]
  edge
  [
    source 72
    target 70
    value 0.333333
  ]
  edge
  [
    source 72
    target 71
    value 0.666667
  ]
  edge
  [
    source 74
    target 73
    value 0.333333
  ]
  edge
  [
    source 75
    target 73
    value 0.333333
  ]
  edge
  [
    source 75
    target 74
    value 0.333333
  ]
  edge
  [
    source 76
    target 73
    value 0.333333
  ]
  edge
  [
    source 76
    target 74
    value 0.333333
  ]
  edge
  [
    source 76
    target 75
    value 0.333333
  ]
  edge
  [
    source 78
    target 77
    value 0.333333
  ]
  edge
  [
    source 78
    target 46
    value 1
  ]
  edge
  [
    source 79
    target 77
    value 0.333333
  ]
  edge
  [
    source 79
    target 78
    value 0.333333
  ]
  edge
  [
    source 80
    target 77
    value 0.333333
  ]
  edge
  [
    source 80
    target 78
    value 0.333333
  ]
  edge
  [
    source 80
    target 79
    value 0.333333
  ]
  edge
  [
    source 82
    target 81
    value 0.5
  ]
  edge
  [
    source 83
    target 81
    value 0.5
  ]
  edge
  [
    source 83
    target 82
    value 0.5
  ]
  edge
  [
    source 85
    target 84
    value 0.5
  ]
  edge
  [
    source 86
    target 84
    value 0.5
  ]
  edge
  [
    source 86
    target 85
    value 0.5
  ]
  edge
  [
    source 88
    target 87
    value 2.5
  ]
  edge
  [
    source 90
    target 55
    value 1
  ]
  edge
  [
    source 92
    target 91
    value 0.5
  ]
  edge
  [
    source 93
    target 91
    value 0.5
  ]
  edge
  [
    source 93
    target 92
    value 0.5
  ]
  edge
  [
    source 95
    target 94
    value 0.5
  ]
  edge
  [
    source 96
    target 94
    value 2.66667
  ]
  edge
  [
    source 96
    target 95
    value 0.5
  ]
  edge
  [
    source 97
    target 94
    value 2.33333
  ]
  edge
  [
    source 97
    target 95
    value 0.5
  ]
  edge
  [
    source 97
    target 96
    value 2.33333
  ]
  edge
  [
    source 97
    target 69
    value 1.83333
  ]
  edge
  [
    source 98
    target 94
    value 0.5
  ]
  edge
  [
    source 98
    target 95
    value 0.5
  ]
  edge
  [
    source 98
    target 96
    value 0.5
  ]
  edge
  [
    source 98
    target 97
    value 0.5
  ]
  edge
  [
    source 99
    target 94
    value 0.5
  ]
  edge
  [
    source 99
    target 96
    value 0.5
  ]
  edge
  [
    source 99
    target 97
    value 0.5
  ]
  edge
  [
    source 100
    target 94
    value 0.25
  ]
  edge
  [
    source 100
    target 99
    value 1.25
  ]
  edge
  [
    source 100
    target 96
    value 0.25
  ]
  edge
  [
    source 100
    target 97
    value 0.25
  ]
  edge
  [
    source 103
    target 102
    value 0.5
  ]
  edge
  [
    source 104
    target 102
    value 0.5
  ]
  edge
  [
    source 104
    target 103
    value 0.5
  ]
  edge
  [
    source 106
    target 105
    value 0.5
  ]
  edge
  [
    source 107
    target 105
    value 0.5
  ]
  edge
  [
    source 107
    target 106
    value 0.5
  ]
  edge
  [
    source 109
    target 108
    value 1
  ]
  edge
  [
    source 112
    target 111
    value 1
  ]
  edge
  [
    source 114
    target 113
    value 1
  ]
  edge
  [
    source 117
    target 116
    value 1
  ]
  edge
  [
    source 119
    target 118
    value 1
  ]
  edge
  [
    source 121
    target 120
    value 1
  ]
  edge
  [
    source 121
    target 78
    value 1
  ]
  edge
  [
    source 123
    target 122
    value 0.5
  ]
  edge
  [
    source 124
    target 122
    value 0.5
  ]
  edge
  [
    source 124
    target 123
    value 0.5
  ]
  edge
  [
    source 127
    target 126
    value 0.7
  ]
  edge
  [
    source 128
    target 126
    value 0.5
  ]
  edge
  [
    source 128
    target 127
    value 0.75
  ]
  edge
  [
    source 130
    target 129
    value 1
  ]
  edge
  [
    source 131
    target 33
    value 1.33333
  ]
  edge
  [
    source 131
    target 30
    value 0.333333
  ]
  edge
  [
    source 131
    target 34
    value 0.333333
  ]
  edge
  [
    source 132
    target 33
    value 2.275
  ]
  edge
  [
    source 132
    target 34
    value 0.525
  ]
  edge
  [
    source 132
    target 53
    value 1.025
  ]
  edge
  [
    source 132
    target 54
    value 0.375
  ]
  edge
  [
    source 133
    target 33
    value 1.025
  ]
  edge
  [
    source 133
    target 34
    value 1.025
  ]
  edge
  [
    source 133
    target 132
    value 0.525
  ]
  edge
  [
    source 133
    target 53
    value 0.525
  ]
  edge
  [
    source 133
    target 54
    value 0.125
  ]
  edge
  [
    source 134
    target 33
    value 0.525
  ]
  edge
  [
    source 134
    target 34
    value 0.525
  ]
  edge
  [
    source 134
    target 132
    value 0.525
  ]
  edge
  [
    source 134
    target 133
    value 0.525
  ]
  edge
  [
    source 134
    target 53
    value 0.525
  ]
  edge
  [
    source 134
    target 54
    value 0.125
  ]
  edge
  [
    source 136
    target 135
    value 1
  ]
  edge
  [
    source 138
    target 137
    value 1
  ]
  edge
  [
    source 140
    target 139
    value 0.111111
  ]
  edge
  [
    source 141
    target 139
    value 0.111111
  ]
  edge
  [
    source 141
    target 140
    value 0.111111
  ]
  edge
  [
    source 142
    target 139
    value 0.111111
  ]
  edge
  [
    source 142
    target 140
    value 0.111111
  ]
  edge
  [
    source 142
    target 141
    value 0.111111
  ]
  edge
  [
    source 143
    target 139
    value 0.111111
  ]
  edge
  [
    source 143
    target 140
    value 0.111111
  ]
  edge
  [
    source 143
    target 141
    value 0.111111
  ]
  edge
  [
    source 143
    target 142
    value 0.111111
  ]
  edge
  [
    source 144
    target 139
    value 0.111111
  ]
  edge
  [
    source 144
    target 140
    value 0.111111
  ]
  edge
  [
    source 144
    target 141
    value 0.111111
  ]
  edge
  [
    source 144
    target 142
    value 0.111111
  ]
  edge
  [
    source 144
    target 143
    value 0.111111
  ]
  edge
  [
    source 145
    target 139
    value 0.111111
  ]
  edge
  [
    source 145
    target 140
    value 0.111111
  ]
  edge
  [
    source 145
    target 141
    value 0.111111
  ]
  edge
  [
    source 145
    target 142
    value 0.111111
  ]
  edge
  [
    source 145
    target 143
    value 0.111111
  ]
  edge
  [
    source 145
    target 144
    value 0.111111
  ]
  edge
  [
    source 146
    target 139
    value 0.111111
  ]
  edge
  [
    source 146
    target 140
    value 0.111111
  ]
  edge
  [
    source 146
    target 141
    value 0.111111
  ]
  edge
  [
    source 146
    target 142
    value 0.111111
  ]
  edge
  [
    source 146
    target 143
    value 0.111111
  ]
  edge
  [
    source 146
    target 144
    value 0.111111
  ]
  edge
  [
    source 146
    target 145
    value 0.111111
  ]
  edge
  [
    source 147
    target 139
    value 0.111111
  ]
  edge
  [
    source 147
    target 140
    value 0.111111
  ]
  edge
  [
    source 147
    target 141
    value 0.111111
  ]
  edge
  [
    source 147
    target 142
    value 0.111111
  ]
  edge
  [
    source 147
    target 143
    value 0.111111
  ]
  edge
  [
    source 147
    target 144
    value 0.111111
  ]
  edge
  [
    source 147
    target 145
    value 0.111111
  ]
  edge
  [
    source 147
    target 146
    value 0.111111
  ]
  edge
  [
    source 148
    target 139
    value 0.111111
  ]
  edge
  [
    source 148
    target 140
    value 0.111111
  ]
  edge
  [
    source 148
    target 141
    value 0.111111
  ]
  edge
  [
    source 148
    target 142
    value 0.111111
  ]
  edge
  [
    source 148
    target 143
    value 0.111111
  ]
  edge
  [
    source 148
    target 144
    value 0.111111
  ]
  edge
  [
    source 148
    target 145
    value 0.111111
  ]
  edge
  [
    source 148
    target 146
    value 0.111111
  ]
  edge
  [
    source 148
    target 147
    value 0.111111
  ]
  edge
  [
    source 149
    target 71
    value 1.16667
  ]
  edge
  [
    source 150
    target 149
    value 0.666667
  ]
  edge
  [
    source 150
    target 71
    value 0.666667
  ]
  edge
  [
    source 150
    target 96
    value 0.833333
  ]
  edge
  [
    source 150
    target 94
    value 0.333333
  ]
  edge
  [
    source 151
    target 149
    value 1.16667
  ]
  edge
  [
    source 151
    target 71
    value 1.16667
  ]
  edge
  [
    source 151
    target 150
    value 4.75
  ]
  edge
  [
    source 151
    target 127
    value 0.333333
  ]
  edge
  [
    source 152
    target 149
    value 1
  ]
  edge
  [
    source 154
    target 153
    value 1.33333
  ]
  edge
  [
    source 155
    target 153
    value 0.333333
  ]
  edge
  [
    source 155
    target 154
    value 0.333333
  ]
  edge
  [
    source 156
    target 153
    value 0.333333
  ]
  edge
  [
    source 156
    target 154
    value 0.333333
  ]
  edge
  [
    source 156
    target 155
    value 0.333333
  ]
  edge
  [
    source 157
    target 71
    value 0.5
  ]
  edge
  [
    source 158
    target 71
    value 0.5
  ]
  edge
  [
    source 158
    target 157
    value 0.5
  ]
  edge
  [
    source 161
    target 160
    value 1
  ]
  edge
  [
    source 163
    target 162
    value 1
  ]
  edge
  [
    source 165
    target 164
    value 1
  ]
  edge
  [
    source 167
    target 166
    value 1
  ]
  edge
  [
    source 170
    target 169
    value 0.5
  ]
  edge
  [
    source 171
    target 169
    value 0.5
  ]
  edge
  [
    source 171
    target 170
    value 0.5
  ]
  edge
  [
    source 173
    target 172
    value 0.5
  ]
  edge
  [
    source 174
    target 172
    value 1.5
  ]
  edge
  [
    source 174
    target 173
    value 0.5
  ]
  edge
  [
    source 176
    target 175
    value 0.5
  ]
  edge
  [
    source 177
    target 175
    value 0.5
  ]
  edge
  [
    source 177
    target 176
    value 0.5
  ]
  edge
  [
    source 180
    target 179
    value 1
  ]
  edge
  [
    source 181
    target 179
    value 1
  ]
  edge
  [
    source 181
    target 180
    value 1
  ]
  edge
  [
    source 183
    target 182
    value 1
  ]
  edge
  [
    source 184
    target 55
    value 0.5
  ]
  edge
  [
    source 184
    target 56
    value 0.5
  ]
  edge
  [
    source 185
    target 184
    value 0.5
  ]
  edge
  [
    source 186
    target 184
    value 0.5
  ]
  edge
  [
    source 186
    target 185
    value 0.5
  ]
  edge
  [
    source 188
    target 187
    value 1.5
  ]
  edge
  [
    source 189
    target 187
    value 0.5
  ]
  edge
  [
    source 189
    target 188
    value 0.5
  ]
  edge
  [
    source 190
    target 33
    value 0.583333
  ]
  edge
  [
    source 191
    target 46
    value 0.833333
  ]
  edge
  [
    source 192
    target 191
    value 0.333333
  ]
  edge
  [
    source 192
    target 46
    value 0.333333
  ]
  edge
  [
    source 193
    target 191
    value 0.333333
  ]
  edge
  [
    source 193
    target 192
    value 0.333333
  ]
  edge
  [
    source 193
    target 46
    value 0.333333
  ]
  edge
  [
    source 194
    target 191
    value 0.5
  ]
  edge
  [
    source 194
    target 46
    value 0.5
  ]
  edge
  [
    source 196
    target 195
    value 1.25
  ]
  edge
  [
    source 197
    target 195
    value 0.25
  ]
  edge
  [
    source 197
    target 196
    value 0.25
  ]
  edge
  [
    source 198
    target 195
    value 0.25
  ]
  edge
  [
    source 198
    target 196
    value 0.25
  ]
  edge
  [
    source 198
    target 197
    value 0.25
  ]
  edge
  [
    source 199
    target 195
    value 0.25
  ]
  edge
  [
    source 199
    target 196
    value 0.25
  ]
  edge
  [
    source 199
    target 197
    value 0.25
  ]
  edge
  [
    source 199
    target 198
    value 0.25
  ]
  edge
  [
    source 201
    target 200
    value 0.5
  ]
  edge
  [
    source 201
    target 24
    value 0.333333
  ]
  edge
  [
    source 201
    target 25
    value 0.333333
  ]
  edge
  [
    source 202
    target 200
    value 0.5
  ]
  edge
  [
    source 202
    target 201
    value 0.833333
  ]
  edge
  [
    source 202
    target 24
    value 0.333333
  ]
  edge
  [
    source 202
    target 25
    value 0.333333
  ]
  edge
  [
    source 203
    target 131
    value 1
  ]
  edge
  [
    source 206
    target 205
    value 1
  ]
  edge
  [
    source 208
    target 207
    value 0.5
  ]
  edge
  [
    source 209
    target 207
    value 0.5
  ]
  edge
  [
    source 209
    target 208
    value 0.5
  ]
  edge
  [
    source 211
    target 210
    value 0.5
  ]
  edge
  [
    source 212
    target 210
    value 0.5
  ]
  edge
  [
    source 212
    target 211
    value 0.5
  ]
  edge
  [
    source 214
    target 213
    value 0.5
  ]
  edge
  [
    source 215
    target 213
    value 0.5
  ]
  edge
  [
    source 215
    target 214
    value 0.5
  ]
  edge
  [
    source 216
    target 48
    value 0.333333
  ]
  edge
  [
    source 216
    target 136
    value 0.5
  ]
  edge
  [
    source 217
    target 216
    value 1.08333
  ]
  edge
  [
    source 217
    target 48
    value 0.333333
  ]
  edge
  [
    source 218
    target 216
    value 1.66667
  ]
  edge
  [
    source 218
    target 217
    value 1.08333
  ]
  edge
  [
    source 218
    target 48
    value 0.333333
  ]
  edge
  [
    source 219
    target 216
    value 0.5
  ]
  edge
  [
    source 219
    target 218
    value 0.25
  ]
  edge
  [
    source 220
    target 216
    value 1.5
  ]
  edge
  [
    source 220
    target 219
    value 0.5
  ]
  edge
  [
    source 220
    target 218
    value 0.25
  ]
  edge
  [
    source 221
    target 216
    value 0.25
  ]
  edge
  [
    source 221
    target 219
    value 0.583333
  ]
  edge
  [
    source 221
    target 220
    value 0.25
  ]
  edge
  [
    source 222
    target 216
    value 0.25
  ]
  edge
  [
    source 222
    target 219
    value 1.75
  ]
  edge
  [
    source 222
    target 220
    value 0.25
  ]
  edge
  [
    source 222
    target 221
    value 0.25
  ]
  edge
  [
    source 223
    target 216
    value 0.5
  ]
  edge
  [
    source 223
    target 136
    value 0.5
  ]
  edge
  [
    source 224
    target 216
    value 0.583333
  ]
  edge
  [
    source 224
    target 220
    value 0.25
  ]
  edge
  [
    source 224
    target 219
    value 0.25
  ]
  edge
  [
    source 224
    target 218
    value 0.583333
  ]
  edge
  [
    source 225
    target 150
    value 2.08333
  ]
  edge
  [
    source 225
    target 96
    value 0.333333
  ]
  edge
  [
    source 225
    target 94
    value 0.333333
  ]
  edge
  [
    source 225
    target 151
    value 0.75
  ]
  edge
  [
    source 227
    target 226
    value 1
  ]
  edge
  [
    source 229
    target 228
    value 1.33333
  ]
  edge
  [
    source 230
    target 228
    value 0.333333
  ]
  edge
  [
    source 230
    target 229
    value 0.333333
  ]
  edge
  [
    source 231
    target 228
    value 0.333333
  ]
  edge
  [
    source 231
    target 229
    value 0.333333
  ]
  edge
  [
    source 231
    target 230
    value 0.333333
  ]
  edge
  [
    source 234
    target 233
    value 0.5
  ]
  edge
  [
    source 235
    target 233
    value 0.5
  ]
  edge
  [
    source 235
    target 234
    value 0.5
  ]
  edge
  [
    source 235
    target 72
    value 1
  ]
  edge
  [
    source 238
    target 237
    value 1
  ]
  edge
  [
    source 240
    target 239
    value 1
  ]
  edge
  [
    source 241
    target 239
    value 1
  ]
  edge
  [
    source 243
    target 242
    value 1
  ]
  edge
  [
    source 245
    target 244
    value 3.5
  ]
  edge
  [
    source 246
    target 244
    value 1
  ]
  edge
  [
    source 247
    target 244
    value 1
  ]
  edge
  [
    source 249
    target 248
    value 0.5
  ]
  edge
  [
    source 250
    target 248
    value 0.5
  ]
  edge
  [
    source 250
    target 249
    value 0.5
  ]
  edge
  [
    source 251
    target 217
    value 0.25
  ]
  edge
  [
    source 251
    target 216
    value 0.25
  ]
  edge
  [
    source 251
    target 218
    value 0.25
  ]
  edge
  [
    source 252
    target 217
    value 0.25
  ]
  edge
  [
    source 252
    target 216
    value 0.5
  ]
  edge
  [
    source 252
    target 251
    value 0.25
  ]
  edge
  [
    source 252
    target 218
    value 0.25
  ]
  edge
  [
    source 255
    target 254
    value 1
  ]
  edge
  [
    source 256
    target 254
    value 0.5
  ]
  edge
  [
    source 256
    target 255
    value 0.5
  ]
  edge
  [
    source 259
    target 258
    value 1.33333
  ]
  edge
  [
    source 261
    target 260
    value 1
  ]
  edge
  [
    source 263
    target 262
    value 0.142857
  ]
  edge
  [
    source 264
    target 262
    value 0.142857
  ]
  edge
  [
    source 264
    target 263
    value 0.142857
  ]
  edge
  [
    source 265
    target 262
    value 0.142857
  ]
  edge
  [
    source 265
    target 263
    value 0.67619
  ]
  edge
  [
    source 265
    target 264
    value 0.142857
  ]
  edge
  [
    source 266
    target 262
    value 0.142857
  ]
  edge
  [
    source 266
    target 263
    value 0.67619
  ]
  edge
  [
    source 266
    target 264
    value 0.142857
  ]
  edge
  [
    source 266
    target 265
    value 0.92619
  ]
  edge
  [
    source 267
    target 262
    value 0.142857
  ]
  edge
  [
    source 267
    target 263
    value 0.142857
  ]
  edge
  [
    source 267
    target 264
    value 0.142857
  ]
  edge
  [
    source 267
    target 265
    value 0.142857
  ]
  edge
  [
    source 267
    target 266
    value 0.142857
  ]
  edge
  [
    source 268
    target 262
    value 0.142857
  ]
  edge
  [
    source 268
    target 263
    value 0.67619
  ]
  edge
  [
    source 268
    target 264
    value 0.142857
  ]
  edge
  [
    source 268
    target 265
    value 0.92619
  ]
  edge
  [
    source 268
    target 266
    value 0.92619
  ]
  edge
  [
    source 268
    target 267
    value 0.142857
  ]
  edge
  [
    source 269
    target 262
    value 0.142857
  ]
  edge
  [
    source 269
    target 263
    value 0.142857
  ]
  edge
  [
    source 269
    target 264
    value 0.142857
  ]
  edge
  [
    source 269
    target 265
    value 0.142857
  ]
  edge
  [
    source 269
    target 266
    value 0.142857
  ]
  edge
  [
    source 269
    target 267
    value 0.142857
  ]
  edge
  [
    source 269
    target 268
    value 0.142857
  ]
  edge
  [
    source 271
    target 270
    value 1
  ]
  edge
  [
    source 274
    target 273
    value 0.5
  ]
  edge
  [
    source 275
    target 273
    value 0.5
  ]
  edge
  [
    source 275
    target 274
    value 0.5
  ]
  edge
  [
    source 277
    target 276
    value 0.5
  ]
  edge
  [
    source 278
    target 276
    value 0.5
  ]
  edge
  [
    source 278
    target 277
    value 1
  ]
  edge
  [
    source 280
    target 279
    value 0.166667
  ]
  edge
  [
    source 281
    target 279
    value 0.166667
  ]
  edge
  [
    source 281
    target 280
    value 0.166667
  ]
  edge
  [
    source 281
    target 78
    value 1
  ]
  edge
  [
    source 281
    target 150
    value 1.83333
  ]
  edge
  [
    source 282
    target 279
    value 0.166667
  ]
  edge
  [
    source 282
    target 280
    value 0.166667
  ]
  edge
  [
    source 282
    target 281
    value 0.166667
  ]
  edge
  [
    source 283
    target 279
    value 0.166667
  ]
  edge
  [
    source 283
    target 280
    value 0.166667
  ]
  edge
  [
    source 283
    target 281
    value 3.16667
  ]
  edge
  [
    source 283
    target 282
    value 0.166667
  ]
  edge
  [
    source 284
    target 279
    value 0.166667
  ]
  edge
  [
    source 284
    target 280
    value 0.166667
  ]
  edge
  [
    source 284
    target 281
    value 0.166667
  ]
  edge
  [
    source 284
    target 282
    value 0.166667
  ]
  edge
  [
    source 284
    target 283
    value 0.166667
  ]
  edge
  [
    source 285
    target 279
    value 0.166667
  ]
  edge
  [
    source 285
    target 280
    value 0.166667
  ]
  edge
  [
    source 285
    target 281
    value 0.166667
  ]
  edge
  [
    source 285
    target 282
    value 0.166667
  ]
  edge
  [
    source 285
    target 283
    value 0.166667
  ]
  edge
  [
    source 285
    target 284
    value 0.166667
  ]
  edge
  [
    source 287
    target 286
    value 0.5
  ]
  edge
  [
    source 288
    target 286
    value 1
  ]
  edge
  [
    source 288
    target 287
    value 0.5
  ]
  edge
  [
    source 289
    target 286
    value 0.5
  ]
  edge
  [
    source 289
    target 288
    value 0.5
  ]
  edge
  [
    source 291
    target 290
    value 0.5
  ]
  edge
  [
    source 292
    target 290
    value 0.5
  ]
  edge
  [
    source 292
    target 291
    value 0.5
  ]
  edge
  [
    source 294
    target 293
    value 2.1
  ]
  edge
  [
    source 297
    target 296
    value 1
  ]
  edge
  [
    source 298
    target 296
    value 0.333333
  ]
  edge
  [
    source 299
    target 296
    value 0.333333
  ]
  edge
  [
    source 299
    target 298
    value 0.333333
  ]
  edge
  [
    source 300
    target 296
    value 1.33333
  ]
  edge
  [
    source 300
    target 298
    value 0.333333
  ]
  edge
  [
    source 300
    target 299
    value 0.333333
  ]
  edge
  [
    source 301
    target 203
    value 1.16667
  ]
  edge
  [
    source 301
    target 150
    value 0.5
  ]
  edge
  [
    source 301
    target 151
    value 0.5
  ]
  edge
  [
    source 301
    target 162
    value 0.25
  ]
  edge
  [
    source 302
    target 301
    value 1.33333
  ]
  edge
  [
    source 302
    target 203
    value 0.833333
  ]
  edge
  [
    source 303
    target 301
    value 0.333333
  ]
  edge
  [
    source 303
    target 203
    value 0.333333
  ]
  edge
  [
    source 303
    target 302
    value 0.333333
  ]
  edge
  [
    source 304
    target 301
    value 0.5
  ]
  edge
  [
    source 304
    target 302
    value 0.5
  ]
  edge
  [
    source 305
    target 78
    value 0.583333
  ]
  edge
  [
    source 306
    target 305
    value 0.25
  ]
  edge
  [
    source 306
    target 78
    value 0.25
  ]
  edge
  [
    source 307
    target 305
    value 0.25
  ]
  edge
  [
    source 307
    target 306
    value 0.25
  ]
  edge
  [
    source 307
    target 78
    value 0.25
  ]
  edge
  [
    source 307
    target 265
    value 0.25
  ]
  edge
  [
    source 307
    target 266
    value 0.25
  ]
  edge
  [
    source 307
    target 268
    value 0.25
  ]
  edge
  [
    source 308
    target 305
    value 0.583333
  ]
  edge
  [
    source 308
    target 306
    value 0.25
  ]
  edge
  [
    source 308
    target 307
    value 0.25
  ]
  edge
  [
    source 308
    target 78
    value 1.58333
  ]
  edge
  [
    source 309
    target 305
    value 0.333333
  ]
  edge
  [
    source 309
    target 78
    value 3.33333
  ]
  edge
  [
    source 309
    target 308
    value 2.33333
  ]
  edge
  [
    source 310
    target 97
    value 0.5
  ]
  edge
  [
    source 310
    target 69
    value 0.5
  ]
  edge
  [
    source 312
    target 311
    value 1
  ]
  edge
  [
    source 314
    target 313
    value 0.5
  ]
  edge
  [
    source 315
    target 313
    value 0.5
  ]
  edge
  [
    source 315
    target 314
    value 0.5
  ]
  edge
  [
    source 316
    target 203
    value 0.333333
  ]
  edge
  [
    source 316
    target 301
    value 0.583333
  ]
  edge
  [
    source 316
    target 162
    value 0.25
  ]
  edge
  [
    source 317
    target 203
    value 0.333333
  ]
  edge
  [
    source 317
    target 316
    value 0.333333
  ]
  edge
  [
    source 317
    target 301
    value 0.333333
  ]
  edge
  [
    source 319
    target 318
    value 1
  ]
  edge
  [
    source 321
    target 320
    value 0.833333
  ]
  edge
  [
    source 322
    target 320
    value 0.333333
  ]
  edge
  [
    source 322
    target 321
    value 0.333333
  ]
  edge
  [
    source 323
    target 320
    value 0.666667
  ]
  edge
  [
    source 323
    target 321
    value 0.333333
  ]
  edge
  [
    source 323
    target 322
    value 0.333333
  ]
  edge
  [
    source 324
    target 320
    value 0.333333
  ]
  edge
  [
    source 324
    target 323
    value 0.333333
  ]
  edge
  [
    source 325
    target 320
    value 0.333333
  ]
  edge
  [
    source 325
    target 323
    value 0.333333
  ]
  edge
  [
    source 325
    target 324
    value 0.333333
  ]
  edge
  [
    source 327
    target 326
    value 0.333333
  ]
  edge
  [
    source 327
    target 30
    value 0.333333
  ]
  edge
  [
    source 328
    target 326
    value 0.333333
  ]
  edge
  [
    source 328
    target 327
    value 1.16667
  ]
  edge
  [
    source 329
    target 326
    value 0.333333
  ]
  edge
  [
    source 329
    target 327
    value 0.333333
  ]
  edge
  [
    source 329
    target 328
    value 0.333333
  ]
  edge
  [
    source 330
    target 151
    value 0.5
  ]
  edge
  [
    source 331
    target 330
    value 0.5
  ]
  edge
  [
    source 331
    target 151
    value 0.5
  ]
  edge
  [
    source 333
    target 332
    value 0.333333
  ]
  edge
  [
    source 334
    target 332
    value 0.333333
  ]
  edge
  [
    source 334
    target 333
    value 0.333333
  ]
  edge
  [
    source 335
    target 332
    value 0.333333
  ]
  edge
  [
    source 335
    target 333
    value 0.333333
  ]
  edge
  [
    source 335
    target 334
    value 0.333333
  ]
  edge
  [
    source 337
    target 336
    value 1
  ]
  edge
  [
    source 339
    target 338
    value 0.333333
  ]
  edge
  [
    source 340
    target 338
    value 0.333333
  ]
  edge
  [
    source 340
    target 339
    value 0.333333
  ]
  edge
  [
    source 341
    target 338
    value 0.333333
  ]
  edge
  [
    source 341
    target 339
    value 1.33333
  ]
  edge
  [
    source 341
    target 340
    value 0.333333
  ]
  edge
  [
    source 343
    target 342
    value 0.5
  ]
  edge
  [
    source 343
    target 221
    value 0.333333
  ]
  edge
  [
    source 343
    target 219
    value 2.47619
  ]
  edge
  [
    source 344
    target 342
    value 0.5
  ]
  edge
  [
    source 344
    target 343
    value 0.5
  ]
  edge
  [
    source 345
    target 252
    value 0.25
  ]
  edge
  [
    source 345
    target 216
    value 0.583333
  ]
  edge
  [
    source 346
    target 345
    value 0.583333
  ]
  edge
  [
    source 346
    target 252
    value 0.25
  ]
  edge
  [
    source 346
    target 216
    value 0.916667
  ]
  edge
  [
    source 347
    target 345
    value 0.583333
  ]
  edge
  [
    source 347
    target 346
    value 0.583333
  ]
  edge
  [
    source 347
    target 252
    value 0.25
  ]
  edge
  [
    source 347
    target 216
    value 0.583333
  ]
  edge
  [
    source 349
    target 348
    value 0.2
  ]
  edge
  [
    source 350
    target 348
    value 0.2
  ]
  edge
  [
    source 350
    target 349
    value 0.2
  ]
  edge
  [
    source 351
    target 348
    value 0.2
  ]
  edge
  [
    source 351
    target 349
    value 0.2
  ]
  edge
  [
    source 351
    target 350
    value 0.2
  ]
  edge
  [
    source 352
    target 348
    value 0.2
  ]
  edge
  [
    source 352
    target 349
    value 0.2
  ]
  edge
  [
    source 352
    target 350
    value 0.2
  ]
  edge
  [
    source 352
    target 351
    value 0.2
  ]
  edge
  [
    source 353
    target 348
    value 0.2
  ]
  edge
  [
    source 353
    target 349
    value 0.2
  ]
  edge
  [
    source 353
    target 350
    value 0.2
  ]
  edge
  [
    source 353
    target 351
    value 0.2
  ]
  edge
  [
    source 353
    target 352
    value 0.2
  ]
  edge
  [
    source 355
    target 354
    value 0.5
  ]
  edge
  [
    source 356
    target 354
    value 0.5
  ]
  edge
  [
    source 356
    target 355
    value 0.5
  ]
  edge
  [
    source 358
    target 357
    value 0.833333
  ]
  edge
  [
    source 359
    target 357
    value 0.5
  ]
  edge
  [
    source 359
    target 358
    value 0.5
  ]
  edge
  [
    source 360
    target 357
    value 0.333333
  ]
  edge
  [
    source 360
    target 358
    value 0.333333
  ]
  edge
  [
    source 361
    target 357
    value 0.333333
  ]
  edge
  [
    source 361
    target 360
    value 0.333333
  ]
  edge
  [
    source 361
    target 358
    value 0.333333
  ]
  edge
  [
    source 362
    target 62
    value 0.2
  ]
  edge
  [
    source 363
    target 362
    value 1
  ]
  edge
  [
    source 364
    target 362
    value 0.5
  ]
  edge
  [
    source 365
    target 362
    value 0.5
  ]
  edge
  [
    source 365
    target 364
    value 0.5
  ]
  edge
  [
    source 367
    target 366
    value 0.5
  ]
  edge
  [
    source 368
    target 366
    value 0.5
  ]
  edge
  [
    source 368
    target 367
    value 0.5
  ]
  edge
  [
    source 369
    target 24
    value 0.5
  ]
  edge
  [
    source 369
    target 25
    value 0.5
  ]
  edge
  [
    source 370
    target 78
    value 0.5
  ]
  edge
  [
    source 371
    target 370
    value 0.5
  ]
  edge
  [
    source 371
    target 78
    value 2.5
  ]
  edge
  [
    source 371
    target 309
    value 0.5
  ]
  edge
  [
    source 373
    target 372
    value 0.5
  ]
  edge
  [
    source 374
    target 372
    value 0.5
  ]
  edge
  [
    source 374
    target 373
    value 0.5
  ]
  edge
  [
    source 375
    target 33
    value 0.25
  ]
  edge
  [
    source 376
    target 375
    value 1.91667
  ]
  edge
  [
    source 376
    target 33
    value 0.25
  ]
  edge
  [
    source 377
    target 375
    value 2.91667
  ]
  edge
  [
    source 377
    target 376
    value 1.91667
  ]
  edge
  [
    source 377
    target 33
    value 0.25
  ]
  edge
  [
    source 378
    target 375
    value 0.333333
  ]
  edge
  [
    source 378
    target 376
    value 0.333333
  ]
  edge
  [
    source 378
    target 377
    value 0.333333
  ]
  edge
  [
    source 380
    target 379
    value 0.5
  ]
  edge
  [
    source 381
    target 379
    value 0.5
  ]
  edge
  [
    source 381
    target 380
    value 0.5
  ]
  edge
  [
    source 383
    target 382
    value 0.5
  ]
  edge
  [
    source 384
    target 382
    value 0.5
  ]
  edge
  [
    source 384
    target 383
    value 0.5
  ]
  edge
  [
    source 386
    target 385
    value 0.142857
  ]
  edge
  [
    source 387
    target 385
    value 0.142857
  ]
  edge
  [
    source 387
    target 386
    value 0.142857
  ]
  edge
  [
    source 388
    target 385
    value 0.142857
  ]
  edge
  [
    source 388
    target 386
    value 0.142857
  ]
  edge
  [
    source 388
    target 387
    value 0.142857
  ]
  edge
  [
    source 389
    target 385
    value 0.142857
  ]
  edge
  [
    source 389
    target 386
    value 0.142857
  ]
  edge
  [
    source 389
    target 387
    value 0.142857
  ]
  edge
  [
    source 389
    target 388
    value 0.142857
  ]
  edge
  [
    source 390
    target 385
    value 0.142857
  ]
  edge
  [
    source 390
    target 386
    value 0.142857
  ]
  edge
  [
    source 390
    target 387
    value 0.142857
  ]
  edge
  [
    source 390
    target 388
    value 0.142857
  ]
  edge
  [
    source 390
    target 389
    value 0.142857
  ]
  edge
  [
    source 391
    target 385
    value 0.142857
  ]
  edge
  [
    source 391
    target 386
    value 0.142857
  ]
  edge
  [
    source 391
    target 387
    value 0.142857
  ]
  edge
  [
    source 391
    target 388
    value 0.142857
  ]
  edge
  [
    source 391
    target 389
    value 0.142857
  ]
  edge
  [
    source 391
    target 390
    value 0.142857
  ]
  edge
  [
    source 392
    target 385
    value 0.142857
  ]
  edge
  [
    source 392
    target 386
    value 0.142857
  ]
  edge
  [
    source 392
    target 387
    value 0.142857
  ]
  edge
  [
    source 392
    target 388
    value 0.142857
  ]
  edge
  [
    source 392
    target 389
    value 0.142857
  ]
  edge
  [
    source 392
    target 390
    value 0.142857
  ]
  edge
  [
    source 392
    target 391
    value 0.142857
  ]
  edge
  [
    source 394
    target 393
    value 0.333333
  ]
  edge
  [
    source 395
    target 393
    value 0.333333
  ]
  edge
  [
    source 395
    target 394
    value 0.333333
  ]
  edge
  [
    source 396
    target 393
    value 0.333333
  ]
  edge
  [
    source 396
    target 394
    value 0.333333
  ]
  edge
  [
    source 396
    target 395
    value 0.333333
  ]
  edge
  [
    source 398
    target 397
    value 0.333333
  ]
  edge
  [
    source 399
    target 397
    value 0.333333
  ]
  edge
  [
    source 399
    target 398
    value 0.333333
  ]
  edge
  [
    source 400
    target 397
    value 0.333333
  ]
  edge
  [
    source 400
    target 398
    value 0.333333
  ]
  edge
  [
    source 400
    target 399
    value 0.333333
  ]
  edge
  [
    source 401
    target 277
    value 0.166667
  ]
  edge
  [
    source 401
    target 278
    value 0.166667
  ]
  edge
  [
    source 402
    target 401
    value 0.166667
  ]
  edge
  [
    source 402
    target 277
    value 0.166667
  ]
  edge
  [
    source 402
    target 278
    value 0.166667
  ]
  edge
  [
    source 402
    target 327
    value 2.16667
  ]
  edge
  [
    source 402
    target 328
    value 0.333333
  ]
  edge
  [
    source 402
    target 30
    value 0.333333
  ]
  edge
  [
    source 403
    target 401
    value 0.166667
  ]
  edge
  [
    source 403
    target 402
    value 0.166667
  ]
  edge
  [
    source 403
    target 277
    value 0.5
  ]
  edge
  [
    source 403
    target 278
    value 0.5
  ]
  edge
  [
    source 404
    target 401
    value 0.166667
  ]
  edge
  [
    source 404
    target 402
    value 0.166667
  ]
  edge
  [
    source 404
    target 277
    value 0.166667
  ]
  edge
  [
    source 404
    target 403
    value 0.166667
  ]
  edge
  [
    source 404
    target 278
    value 0.166667
  ]
  edge
  [
    source 405
    target 401
    value 0.166667
  ]
  edge
  [
    source 405
    target 402
    value 0.166667
  ]
  edge
  [
    source 405
    target 277
    value 0.166667
  ]
  edge
  [
    source 405
    target 403
    value 0.166667
  ]
  edge
  [
    source 405
    target 278
    value 0.166667
  ]
  edge
  [
    source 405
    target 404
    value 0.166667
  ]
  edge
  [
    source 406
    target 166
    value 1
  ]
  edge
  [
    source 409
    target 408
    value 0.25
  ]
  edge
  [
    source 410
    target 408
    value 0.583333
  ]
  edge
  [
    source 410
    target 409
    value 0.25
  ]
  edge
  [
    source 411
    target 408
    value 0.25
  ]
  edge
  [
    source 411
    target 409
    value 0.25
  ]
  edge
  [
    source 411
    target 410
    value 0.25
  ]
  edge
  [
    source 412
    target 408
    value 0.583333
  ]
  edge
  [
    source 412
    target 409
    value 0.25
  ]
  edge
  [
    source 412
    target 410
    value 0.583333
  ]
  edge
  [
    source 412
    target 411
    value 0.25
  ]
  edge
  [
    source 413
    target 408
    value 0.333333
  ]
  edge
  [
    source 413
    target 410
    value 0.333333
  ]
  edge
  [
    source 413
    target 412
    value 0.333333
  ]
  edge
  [
    source 415
    target 414
    value 1
  ]
  edge
  [
    source 415
    target 247
    value 0.333333
  ]
  edge
  [
    source 416
    target 402
    value 0.833333
  ]
  edge
  [
    source 416
    target 327
    value 3.5
  ]
  edge
  [
    source 416
    target 328
    value 0.333333
  ]
  edge
  [
    source 417
    target 402
    value 1
  ]
  edge
  [
    source 417
    target 327
    value 1
  ]
  edge
  [
    source 419
    target 418
    value 1
  ]
  edge
  [
    source 421
    target 319
    value 1
  ]
  edge
  [
    source 423
    target 422
    value 0.5
  ]
  edge
  [
    source 424
    target 422
    value 0.5
  ]
  edge
  [
    source 424
    target 423
    value 0.5
  ]
  edge
  [
    source 426
    target 425
    value 0.5
  ]
  edge
  [
    source 427
    target 425
    value 0.5
  ]
  edge
  [
    source 427
    target 426
    value 0.5
  ]
  edge
  [
    source 428
    target 46
    value 1.33333
  ]
  edge
  [
    source 429
    target 428
    value 1
  ]
  edge
  [
    source 431
    target 430
    value 1
  ]
  edge
  [
    source 432
    target 430
    value 1
  ]
  edge
  [
    source 434
    target 433
    value 1
  ]
  edge
  [
    source 435
    target 245
    value 1
  ]
  edge
  [
    source 435
    target 244
    value 1
  ]
  edge
  [
    source 437
    target 436
    value 0.5
  ]
  edge
  [
    source 438
    target 436
    value 0.5
  ]
  edge
  [
    source 438
    target 437
    value 0.5
  ]
  edge
  [
    source 439
    target 118
    value 0.5
  ]
  edge
  [
    source 440
    target 439
    value 1
  ]
  edge
  [
    source 441
    target 439
    value 0.5
  ]
  edge
  [
    source 441
    target 118
    value 0.5
  ]
  edge
  [
    source 443
    target 442
    value 1
  ]
  edge
  [
    source 443
    target 72
    value 0.5
  ]
  edge
  [
    source 445
    target 444
    value 1
  ]
  edge
  [
    source 447
    target 446
    value 0.333333
  ]
  edge
  [
    source 448
    target 446
    value 0.333333
  ]
  edge
  [
    source 448
    target 447
    value 0.333333
  ]
  edge
  [
    source 449
    target 446
    value 0.333333
  ]
  edge
  [
    source 449
    target 447
    value 0.333333
  ]
  edge
  [
    source 449
    target 448
    value 0.333333
  ]
  edge
  [
    source 450
    target 282
    value 1
  ]
  edge
  [
    source 453
    target 452
    value 0.142857
  ]
  edge
  [
    source 454
    target 452
    value 0.142857
  ]
  edge
  [
    source 454
    target 453
    value 0.142857
  ]
  edge
  [
    source 455
    target 452
    value 0.142857
  ]
  edge
  [
    source 455
    target 453
    value 0.142857
  ]
  edge
  [
    source 455
    target 454
    value 0.142857
  ]
  edge
  [
    source 456
    target 452
    value 0.142857
  ]
  edge
  [
    source 456
    target 453
    value 0.142857
  ]
  edge
  [
    source 456
    target 454
    value 0.142857
  ]
  edge
  [
    source 456
    target 455
    value 0.142857
  ]
  edge
  [
    source 457
    target 452
    value 0.142857
  ]
  edge
  [
    source 457
    target 453
    value 0.142857
  ]
  edge
  [
    source 457
    target 454
    value 0.142857
  ]
  edge
  [
    source 457
    target 455
    value 0.142857
  ]
  edge
  [
    source 457
    target 456
    value 0.142857
  ]
  edge
  [
    source 458
    target 452
    value 0.142857
  ]
  edge
  [
    source 458
    target 453
    value 0.642857
  ]
  edge
  [
    source 458
    target 454
    value 0.142857
  ]
  edge
  [
    source 458
    target 455
    value 0.142857
  ]
  edge
  [
    source 458
    target 456
    value 0.142857
  ]
  edge
  [
    source 458
    target 457
    value 0.142857
  ]
  edge
  [
    source 459
    target 452
    value 0.142857
  ]
  edge
  [
    source 459
    target 453
    value 0.642857
  ]
  edge
  [
    source 459
    target 454
    value 0.142857
  ]
  edge
  [
    source 459
    target 455
    value 0.142857
  ]
  edge
  [
    source 459
    target 456
    value 0.142857
  ]
  edge
  [
    source 459
    target 457
    value 0.142857
  ]
  edge
  [
    source 459
    target 458
    value 0.642857
  ]
  edge
  [
    source 461
    target 460
    value 0.333333
  ]
  edge
  [
    source 462
    target 460
    value 0.333333
  ]
  edge
  [
    source 462
    target 461
    value 0.333333
  ]
  edge
  [
    source 463
    target 460
    value 0.333333
  ]
  edge
  [
    source 463
    target 461
    value 0.333333
  ]
  edge
  [
    source 463
    target 462
    value 0.333333
  ]
  edge
  [
    source 463
    target 301
    value 0.5
  ]
  edge
  [
    source 464
    target 33
    value 1
  ]
  edge
  [
    source 465
    target 464
    value 1.5
  ]
  edge
  [
    source 466
    target 464
    value 0.5
  ]
  edge
  [
    source 466
    target 465
    value 0.5
  ]
  edge
  [
    source 468
    target 467
    value 0.25
  ]
  edge
  [
    source 469
    target 467
    value 0.25
  ]
  edge
  [
    source 469
    target 468
    value 0.25
  ]
  edge
  [
    source 470
    target 467
    value 0.25
  ]
  edge
  [
    source 470
    target 468
    value 0.25
  ]
  edge
  [
    source 470
    target 469
    value 0.25
  ]
  edge
  [
    source 471
    target 467
    value 0.25
  ]
  edge
  [
    source 471
    target 468
    value 0.25
  ]
  edge
  [
    source 471
    target 469
    value 0.25
  ]
  edge
  [
    source 471
    target 470
    value 0.25
  ]
  edge
  [
    source 473
    target 472
    value 0.833333
  ]
  edge
  [
    source 473
    target 222
    value 0.5
  ]
  edge
  [
    source 473
    target 219
    value 0.5
  ]
  edge
  [
    source 474
    target 472
    value 0.5
  ]
  edge
  [
    source 474
    target 473
    value 0.5
  ]
  edge
  [
    source 476
    target 475
    value 1
  ]
  edge
  [
    source 477
    target 475
    value 0.5
  ]
  edge
  [
    source 478
    target 475
    value 0.5
  ]
  edge
  [
    source 478
    target 477
    value 0.5
  ]
  edge
  [
    source 480
    target 479
    value 0.333333
  ]
  edge
  [
    source 481
    target 479
    value 0.333333
  ]
  edge
  [
    source 481
    target 480
    value 0.333333
  ]
  edge
  [
    source 482
    target 479
    value 0.333333
  ]
  edge
  [
    source 482
    target 480
    value 0.333333
  ]
  edge
  [
    source 482
    target 481
    value 0.333333
  ]
  edge
  [
    source 484
    target 483
    value 1
  ]
  edge
  [
    source 485
    target 33
    value 1
  ]
  edge
  [
    source 487
    target 486
    value 1
  ]
  edge
  [
    source 488
    target 33
    value 0.333333
  ]
  edge
  [
    source 488
    target 54
    value 0.333333
  ]
  edge
  [
    source 489
    target 488
    value 0.333333
  ]
  edge
  [
    source 489
    target 33
    value 0.333333
  ]
  edge
  [
    source 489
    target 54
    value 0.333333
  ]
  edge
  [
    source 490
    target 309
    value 1.5
  ]
  edge
  [
    source 490
    target 78
    value 0.5
  ]
  edge
  [
    source 491
    target 490
    value 0.5
  ]
  edge
  [
    source 491
    target 309
    value 0.5
  ]
  edge
  [
    source 492
    target 490
    value 1
  ]
  edge
  [
    source 493
    target 490
    value 0.5
  ]
  edge
  [
    source 493
    target 309
    value 0.5
  ]
  edge
  [
    source 495
    target 494
    value 0.5
  ]
  edge
  [
    source 496
    target 494
    value 0.5
  ]
  edge
  [
    source 496
    target 495
    value 0.5
  ]
  edge
  [
    source 498
    target 497
    value 1
  ]
  edge
  [
    source 499
    target 303
    value 1
  ]
  edge
  [
    source 500
    target 150
    value 0.5
  ]
  edge
  [
    source 501
    target 500
    value 1
  ]
  edge
  [
    source 502
    target 500
    value 2.5
  ]
  edge
  [
    source 502
    target 501
    value 1
  ]
  edge
  [
    source 503
    target 500
    value 1.5
  ]
  edge
  [
    source 503
    target 502
    value 0.5
  ]
  edge
  [
    source 506
    target 505
    value 1
  ]
  edge
  [
    source 507
    target 190
    value 0.583333
  ]
  edge
  [
    source 507
    target 33
    value 0.583333
  ]
  edge
  [
    source 508
    target 507
    value 1.08333
  ]
  edge
  [
    source 508
    target 190
    value 0.583333
  ]
  edge
  [
    source 508
    target 33
    value 0.583333
  ]
  edge
  [
    source 509
    target 507
    value 0.75
  ]
  edge
  [
    source 509
    target 508
    value 0.75
  ]
  edge
  [
    source 509
    target 190
    value 0.25
  ]
  edge
  [
    source 509
    target 33
    value 0.25
  ]
  edge
  [
    source 512
    target 511
    value 1
  ]
  edge
  [
    source 513
    target 245
    value 0.5
  ]
  edge
  [
    source 513
    target 244
    value 0.5
  ]
  edge
  [
    source 515
    target 514
    value 0.833333
  ]
  edge
  [
    source 516
    target 514
    value 0.833333
  ]
  edge
  [
    source 516
    target 515
    value 2.33333
  ]
  edge
  [
    source 516
    target 346
    value 0.333333
  ]
  edge
  [
    source 516
    target 216
    value 0.333333
  ]
  edge
  [
    source 516
    target 151
    value 1.58333
  ]
  edge
  [
    source 516
    target 150
    value 1.08333
  ]
  edge
  [
    source 516
    target 225
    value 0.25
  ]
  edge
  [
    source 517
    target 514
    value 0.333333
  ]
  edge
  [
    source 517
    target 515
    value 0.333333
  ]
  edge
  [
    source 517
    target 516
    value 2.91667
  ]
  edge
  [
    source 517
    target 151
    value 2.25
  ]
  edge
  [
    source 517
    target 150
    value 1.58333
  ]
  edge
  [
    source 517
    target 225
    value 0.25
  ]
  edge
  [
    source 517
    target 127
    value 0.333333
  ]
  edge
  [
    source 517
    target 152
    value 1
  ]
  edge
  [
    source 519
    target 518
    value 1
  ]
  edge
  [
    source 521
    target 520
    value 1
  ]
  edge
  [
    source 522
    target 76
    value 1
  ]
  edge
  [
    source 523
    target 522
    value 0.25
  ]
  edge
  [
    source 524
    target 522
    value 0.25
  ]
  edge
  [
    source 524
    target 523
    value 0.25
  ]
  edge
  [
    source 525
    target 522
    value 0.25
  ]
  edge
  [
    source 525
    target 523
    value 0.25
  ]
  edge
  [
    source 525
    target 524
    value 0.25
  ]
  edge
  [
    source 526
    target 522
    value 0.25
  ]
  edge
  [
    source 526
    target 523
    value 0.25
  ]
  edge
  [
    source 526
    target 524
    value 0.25
  ]
  edge
  [
    source 526
    target 525
    value 0.25
  ]
  edge
  [
    source 527
    target 522
    value 2
  ]
  edge
  [
    source 529
    target 528
    value 1
  ]
  edge
  [
    source 531
    target 530
    value 0.533333
  ]
  edge
  [
    source 532
    target 530
    value 0.533333
  ]
  edge
  [
    source 532
    target 531
    value 0.533333
  ]
  edge
  [
    source 533
    target 530
    value 0.333333
  ]
  edge
  [
    source 533
    target 531
    value 0.333333
  ]
  edge
  [
    source 533
    target 532
    value 0.333333
  ]
  edge
  [
    source 535
    target 534
    value 1
  ]
  edge
  [
    source 538
    target 537
    value 0.5
  ]
  edge
  [
    source 539
    target 537
    value 0.833333
  ]
  edge
  [
    source 539
    target 538
    value 0.5
  ]
  edge
  [
    source 540
    target 537
    value 0.333333
  ]
  edge
  [
    source 541
    target 537
    value 0.333333
  ]
  edge
  [
    source 541
    target 540
    value 0.333333
  ]
  edge
  [
    source 542
    target 537
    value 0.333333
  ]
  edge
  [
    source 542
    target 540
    value 0.333333
  ]
  edge
  [
    source 542
    target 541
    value 0.333333
  ]
  edge
  [
    source 545
    target 544
    value 1
  ]
  edge
  [
    source 547
    target 546
    value 1
  ]
  edge
  [
    source 547
    target 55
    value 0.5
  ]
  edge
  [
    source 547
    target 56
    value 0.5
  ]
  edge
  [
    source 547
    target 329
    value 1.5
  ]
  edge
  [
    source 548
    target 121
    value 0.333333
  ]
  edge
  [
    source 549
    target 548
    value 0.333333
  ]
  edge
  [
    source 549
    target 121
    value 0.333333
  ]
  edge
  [
    source 550
    target 548
    value 0.333333
  ]
  edge
  [
    source 550
    target 549
    value 0.333333
  ]
  edge
  [
    source 550
    target 121
    value 1.83333
  ]
  edge
  [
    source 553
    target 552
    value 0.5
  ]
  edge
  [
    source 554
    target 552
    value 0.5
  ]
  edge
  [
    source 554
    target 553
    value 0.5
  ]
  edge
  [
    source 557
    target 556
    value 0.5
  ]
  edge
  [
    source 558
    target 556
    value 0.5
  ]
  edge
  [
    source 558
    target 557
    value 0.5
  ]
  edge
  [
    source 560
    target 559
    value 1
  ]
  edge
  [
    source 561
    target 33
    value 0.708333
  ]
  edge
  [
    source 561
    target 53
    value 0.708333
  ]
  edge
  [
    source 561
    target 34
    value 0.375
  ]
  edge
  [
    source 561
    target 133
    value 0.125
  ]
  edge
  [
    source 561
    target 54
    value 0.375
  ]
  edge
  [
    source 561
    target 132
    value 0.125
  ]
  edge
  [
    source 561
    target 134
    value 0.125
  ]
  edge
  [
    source 562
    target 561
    value 0.458333
  ]
  edge
  [
    source 562
    target 33
    value 0.458333
  ]
  edge
  [
    source 562
    target 53
    value 0.458333
  ]
  edge
  [
    source 562
    target 34
    value 0.125
  ]
  edge
  [
    source 562
    target 133
    value 0.125
  ]
  edge
  [
    source 562
    target 54
    value 0.125
  ]
  edge
  [
    source 562
    target 132
    value 0.125
  ]
  edge
  [
    source 562
    target 134
    value 0.125
  ]
  edge
  [
    source 563
    target 82
    value 1
  ]
  edge
  [
    source 564
    target 563
    value 0.333333
  ]
  edge
  [
    source 565
    target 563
    value 0.333333
  ]
  edge
  [
    source 565
    target 564
    value 0.333333
  ]
  edge
  [
    source 566
    target 563
    value 0.333333
  ]
  edge
  [
    source 566
    target 564
    value 0.333333
  ]
  edge
  [
    source 566
    target 565
    value 0.333333
  ]
  edge
  [
    source 567
    target 189
    value 2.33333
  ]
  edge
  [
    source 569
    target 568
    value 1
  ]
  edge
  [
    source 571
    target 570
    value 1
  ]
  edge
  [
    source 573
    target 572
    value 1
  ]
  edge
  [
    source 574
    target 281
    value 2.5
  ]
  edge
  [
    source 574
    target 283
    value 0.5
  ]
  edge
  [
    source 575
    target 574
    value 0.5
  ]
  edge
  [
    source 575
    target 281
    value 0.5
  ]
  edge
  [
    source 576
    target 574
    value 0.5
  ]
  edge
  [
    source 576
    target 281
    value 0.5
  ]
  edge
  [
    source 578
    target 577
    value 1
  ]
  edge
  [
    source 581
    target 580
    value 0.5
  ]
  edge
  [
    source 582
    target 580
    value 0.5
  ]
  edge
  [
    source 582
    target 581
    value 0.5
  ]
  edge
  [
    source 584
    target 583
    value 1
  ]
  edge
  [
    source 585
    target 136
    value 0.333333
  ]
  edge
  [
    source 586
    target 585
    value 0.333333
  ]
  edge
  [
    source 586
    target 136
    value 0.333333
  ]
  edge
  [
    source 587
    target 585
    value 0.333333
  ]
  edge
  [
    source 587
    target 586
    value 0.333333
  ]
  edge
  [
    source 587
    target 136
    value 1.83333
  ]
  edge
  [
    source 590
    target 589
    value 0.583333
  ]
  edge
  [
    source 590
    target 307
    value 1
  ]
  edge
  [
    source 591
    target 589
    value 0.583333
  ]
  edge
  [
    source 591
    target 590
    value 1.58333
  ]
  edge
  [
    source 592
    target 589
    value 0.333333
  ]
  edge
  [
    source 592
    target 590
    value 0.333333
  ]
  edge
  [
    source 592
    target 591
    value 0.333333
  ]
  edge
  [
    source 594
    target 593
    value 1
  ]
  edge
  [
    source 595
    target 277
    value 0.333333
  ]
  edge
  [
    source 595
    target 403
    value 0.333333
  ]
  edge
  [
    source 595
    target 278
    value 0.333333
  ]
  edge
  [
    source 596
    target 327
    value 0.5
  ]
  edge
  [
    source 596
    target 416
    value 0.5
  ]
  edge
  [
    source 596
    target 46
    value 1
  ]
  edge
  [
    source 598
    target 597
    value 1
  ]
  edge
  [
    source 600
    target 599
    value 1
  ]
  edge
  [
    source 603
    target 602
    value 1
  ]
  edge
  [
    source 606
    target 275
    value 0.333333
  ]
  edge
  [
    source 607
    target 275
    value 0.333333
  ]
  edge
  [
    source 607
    target 606
    value 0.333333
  ]
  edge
  [
    source 608
    target 275
    value 0.333333
  ]
  edge
  [
    source 608
    target 606
    value 0.333333
  ]
  edge
  [
    source 608
    target 607
    value 0.333333
  ]
  edge
  [
    source 609
    target 45
    value 0.833333
  ]
  edge
  [
    source 610
    target 609
    value 0.5
  ]
  edge
  [
    source 610
    target 45
    value 0.5
  ]
  edge
  [
    source 611
    target 609
    value 0.333333
  ]
  edge
  [
    source 611
    target 45
    value 0.333333
  ]
  edge
  [
    source 612
    target 609
    value 0.333333
  ]
  edge
  [
    source 612
    target 45
    value 0.333333
  ]
  edge
  [
    source 612
    target 611
    value 0.333333
  ]
  edge
  [
    source 615
    target 614
    value 1
  ]
  edge
  [
    source 617
    target 616
    value 1
  ]
  edge
  [
    source 619
    target 618
    value 0.5
  ]
  edge
  [
    source 620
    target 618
    value 0.5
  ]
  edge
  [
    source 620
    target 619
    value 0.5
  ]
  edge
  [
    source 622
    target 621
    value 1
  ]
  edge
  [
    source 624
    target 623
    value 1
  ]
  edge
  [
    source 626
    target 625
    value 0.333333
  ]
  edge
  [
    source 627
    target 625
    value 0.333333
  ]
  edge
  [
    source 627
    target 626
    value 0.333333
  ]
  edge
  [
    source 628
    target 625
    value 0.333333
  ]
  edge
  [
    source 628
    target 626
    value 0.333333
  ]
  edge
  [
    source 628
    target 627
    value 0.333333
  ]
  edge
  [
    source 630
    target 629
    value 0.5
  ]
  edge
  [
    source 631
    target 629
    value 0.5
  ]
  edge
  [
    source 631
    target 630
    value 1
  ]
  edge
  [
    source 631
    target 337
    value 0.2
  ]
  edge
  [
    source 633
    target 632
    value 1
  ]
  edge
  [
    source 636
    target 635
    value 0.5
  ]
  edge
  [
    source 637
    target 635
    value 0.5
  ]
  edge
  [
    source 637
    target 636
    value 0.5
  ]
  edge
  [
    source 638
    target 162
    value 0.25
  ]
  edge
  [
    source 638
    target 316
    value 0.25
  ]
  edge
  [
    source 638
    target 301
    value 0.75
  ]
  edge
  [
    source 638
    target 463
    value 0.5
  ]
  edge
  [
    source 639
    target 638
    value 0.25
  ]
  edge
  [
    source 639
    target 162
    value 0.25
  ]
  edge
  [
    source 639
    target 316
    value 0.25
  ]
  edge
  [
    source 639
    target 301
    value 0.25
  ]
  edge
  [
    source 640
    target 638
    value 1
  ]
  edge
  [
    source 641
    target 78
    value 1
  ]
  edge
  [
    source 643
    target 642
    value 1
  ]
  edge
  [
    source 646
    target 78
    value 2.5
  ]
  edge
  [
    source 648
    target 647
    value 1
  ]
  edge
  [
    source 650
    target 189
    value 0.333333
  ]
  edge
  [
    source 650
    target 567
    value 0.333333
  ]
  edge
  [
    source 651
    target 650
    value 0.333333
  ]
  edge
  [
    source 651
    target 189
    value 0.333333
  ]
  edge
  [
    source 651
    target 567
    value 0.333333
  ]
  edge
  [
    source 652
    target 34
    value 0.25
  ]
  edge
  [
    source 653
    target 652
    value 0.333333
  ]
  edge
  [
    source 654
    target 652
    value 2.08333
  ]
  edge
  [
    source 654
    target 653
    value 0.333333
  ]
  edge
  [
    source 654
    target 34
    value 1.25
  ]
  edge
  [
    source 654
    target 55
    value 0.333333
  ]
  edge
  [
    source 654
    target 56
    value 0.333333
  ]
  edge
  [
    source 655
    target 652
    value 2.08333
  ]
  edge
  [
    source 655
    target 653
    value 0.333333
  ]
  edge
  [
    source 655
    target 654
    value 2.08333
  ]
  edge
  [
    source 655
    target 34
    value 0.25
  ]
  edge
  [
    source 656
    target 652
    value 0.333333
  ]
  edge
  [
    source 656
    target 654
    value 0.333333
  ]
  edge
  [
    source 656
    target 655
    value 0.333333
  ]
  edge
  [
    source 657
    target 652
    value 0.583333
  ]
  edge
  [
    source 657
    target 34
    value 0.25
  ]
  edge
  [
    source 657
    target 654
    value 0.916667
  ]
  edge
  [
    source 657
    target 655
    value 0.583333
  ]
  edge
  [
    source 659
    target 658
    value 0.333333
  ]
  edge
  [
    source 660
    target 658
    value 0.333333
  ]
  edge
  [
    source 660
    target 659
    value 0.333333
  ]
  edge
  [
    source 661
    target 658
    value 0.333333
  ]
  edge
  [
    source 661
    target 659
    value 0.333333
  ]
  edge
  [
    source 661
    target 660
    value 0.333333
  ]
  edge
  [
    source 663
    target 662
    value 0.75
  ]
  edge
  [
    source 664
    target 662
    value 0.25
  ]
  edge
  [
    source 664
    target 663
    value 0.25
  ]
  edge
  [
    source 665
    target 662
    value 0.25
  ]
  edge
  [
    source 665
    target 663
    value 0.25
  ]
  edge
  [
    source 665
    target 664
    value 0.25
  ]
  edge
  [
    source 666
    target 662
    value 0.25
  ]
  edge
  [
    source 666
    target 663
    value 0.25
  ]
  edge
  [
    source 666
    target 664
    value 0.25
  ]
  edge
  [
    source 666
    target 665
    value 0.25
  ]
  edge
  [
    source 668
    target 667
    value 1
  ]
  edge
  [
    source 670
    target 669
    value 1
  ]
  edge
  [
    source 671
    target 669
    value 1
  ]
  edge
  [
    source 673
    target 672
    value 1
  ]
  edge
  [
    source 674
    target 515
    value 0.5
  ]
  edge
  [
    source 674
    target 516
    value 0.5
  ]
  edge
  [
    source 675
    target 443
    value 0.5
  ]
  edge
  [
    source 676
    target 675
    value 0.5
  ]
  edge
  [
    source 676
    target 443
    value 0.5
  ]
  edge
  [
    source 677
    target 663
    value 0.5
  ]
  edge
  [
    source 677
    target 662
    value 0.5
  ]
  edge
  [
    source 679
    target 678
    value 0.5
  ]
  edge
  [
    source 680
    target 678
    value 0.5
  ]
  edge
  [
    source 680
    target 679
    value 0.5
  ]
  edge
  [
    source 682
    target 681
    value 0.333333
  ]
  edge
  [
    source 683
    target 681
    value 0.333333
  ]
  edge
  [
    source 683
    target 682
    value 0.333333
  ]
  edge
  [
    source 684
    target 681
    value 0.333333
  ]
  edge
  [
    source 684
    target 682
    value 0.333333
  ]
  edge
  [
    source 684
    target 683
    value 0.333333
  ]
  edge
  [
    source 685
    target 57
    value 1
  ]
  edge
  [
    source 686
    target 350
    value 1
  ]
  edge
  [
    source 689
    target 537
    value 0.333333
  ]
  edge
  [
    source 689
    target 539
    value 0.333333
  ]
  edge
  [
    source 690
    target 689
    value 0.333333
  ]
  edge
  [
    source 690
    target 537
    value 0.333333
  ]
  edge
  [
    source 690
    target 539
    value 0.333333
  ]
  edge
  [
    source 692
    target 342
    value 1
  ]
  edge
  [
    source 694
    target 693
    value 0.2
  ]
  edge
  [
    source 695
    target 693
    value 0.2
  ]
  edge
  [
    source 695
    target 694
    value 0.2
  ]
  edge
  [
    source 696
    target 693
    value 0.2
  ]
  edge
  [
    source 696
    target 694
    value 0.2
  ]
  edge
  [
    source 696
    target 695
    value 0.2
  ]
  edge
  [
    source 697
    target 693
    value 1.2
  ]
  edge
  [
    source 697
    target 694
    value 0.2
  ]
  edge
  [
    source 697
    target 695
    value 0.2
  ]
  edge
  [
    source 697
    target 696
    value 0.2
  ]
  edge
  [
    source 697
    target 219
    value 0.142857
  ]
  edge
  [
    source 697
    target 343
    value 0.142857
  ]
  edge
  [
    source 698
    target 693
    value 0.2
  ]
  edge
  [
    source 698
    target 694
    value 0.2
  ]
  edge
  [
    source 698
    target 695
    value 0.2
  ]
  edge
  [
    source 698
    target 696
    value 0.2
  ]
  edge
  [
    source 698
    target 697
    value 0.2
  ]
  edge
  [
    source 699
    target 445
    value 1
  ]
  edge
  [
    source 700
    target 96
    value 0.333333
  ]
  edge
  [
    source 701
    target 700
    value 0.333333
  ]
  edge
  [
    source 701
    target 96
    value 0.333333
  ]
  edge
  [
    source 702
    target 700
    value 0.333333
  ]
  edge
  [
    source 702
    target 96
    value 0.333333
  ]
  edge
  [
    source 702
    target 701
    value 0.333333
  ]
  edge
  [
    source 705
    target 704
    value 0.333333
  ]
  edge
  [
    source 706
    target 704
    value 0.333333
  ]
  edge
  [
    source 706
    target 705
    value 0.333333
  ]
  edge
  [
    source 707
    target 704
    value 0.333333
  ]
  edge
  [
    source 707
    target 705
    value 0.333333
  ]
  edge
  [
    source 707
    target 706
    value 0.333333
  ]
  edge
  [
    source 708
    target 97
    value 0.583333
  ]
  edge
  [
    source 708
    target 94
    value 0.583333
  ]
  edge
  [
    source 708
    target 96
    value 0.583333
  ]
  edge
  [
    source 708
    target 99
    value 0.25
  ]
  edge
  [
    source 709
    target 97
    value 0.333333
  ]
  edge
  [
    source 709
    target 69
    value 0.666667
  ]
  edge
  [
    source 709
    target 71
    value 0.333333
  ]
  edge
  [
    source 709
    target 72
    value 0.333333
  ]
  edge
  [
    source 710
    target 97
    value 0.333333
  ]
  edge
  [
    source 710
    target 709
    value 0.333333
  ]
  edge
  [
    source 710
    target 69
    value 0.333333
  ]
  edge
  [
    source 711
    target 87
    value 0.5
  ]
  edge
  [
    source 711
    target 88
    value 0.5
  ]
  edge
  [
    source 712
    target 642
    value 0.5
  ]
  edge
  [
    source 713
    target 712
    value 0.5
  ]
  edge
  [
    source 713
    target 642
    value 0.5
  ]
  edge
  [
    source 715
    target 695
    value 0.25
  ]
  edge
  [
    source 716
    target 695
    value 0.25
  ]
  edge
  [
    source 716
    target 715
    value 0.25
  ]
  edge
  [
    source 717
    target 695
    value 0.25
  ]
  edge
  [
    source 717
    target 715
    value 0.25
  ]
  edge
  [
    source 717
    target 716
    value 0.25
  ]
  edge
  [
    source 718
    target 695
    value 0.25
  ]
  edge
  [
    source 718
    target 715
    value 0.25
  ]
  edge
  [
    source 718
    target 716
    value 0.25
  ]
  edge
  [
    source 718
    target 717
    value 0.25
  ]
  edge
  [
    source 720
    target 719
    value 2
  ]
  edge
  [
    source 721
    target 670
    value 1
  ]
  edge
  [
    source 724
    target 723
    value 0.333333
  ]
  edge
  [
    source 725
    target 723
    value 0.333333
  ]
  edge
  [
    source 725
    target 724
    value 0.333333
  ]
  edge
  [
    source 726
    target 723
    value 0.333333
  ]
  edge
  [
    source 726
    target 724
    value 0.333333
  ]
  edge
  [
    source 726
    target 725
    value 0.333333
  ]
  edge
  [
    source 729
    target 136
    value 0.5
  ]
  edge
  [
    source 729
    target 587
    value 0.5
  ]
  edge
  [
    source 731
    target 730
    value 1
  ]
  edge
  [
    source 733
    target 732
    value 0.5
  ]
  edge
  [
    source 734
    target 732
    value 0.5
  ]
  edge
  [
    source 734
    target 733
    value 0.5
  ]
  edge
  [
    source 736
    target 71
    value 0.5
  ]
  edge
  [
    source 737
    target 736
    value 0.5
  ]
  edge
  [
    source 737
    target 71
    value 0.5
  ]
  edge
  [
    source 738
    target 443
    value 0.5
  ]
  edge
  [
    source 738
    target 72
    value 0.5
  ]
  edge
  [
    source 739
    target 443
    value 1
  ]
  edge
  [
    source 742
    target 293
    value 0.9
  ]
  edge
  [
    source 742
    target 294
    value 1.9
  ]
  edge
  [
    source 742
    target 523
    value 0.333333
  ]
  edge
  [
    source 743
    target 742
    value 1.4
  ]
  edge
  [
    source 743
    target 293
    value 0.9
  ]
  edge
  [
    source 743
    target 294
    value 1.4
  ]
  edge
  [
    source 744
    target 742
    value 1.2
  ]
  edge
  [
    source 744
    target 293
    value 0.7
  ]
  edge
  [
    source 744
    target 743
    value 0.7
  ]
  edge
  [
    source 744
    target 294
    value 2.7
  ]
  edge
  [
    source 745
    target 742
    value 1
  ]
  edge
  [
    source 746
    target 742
    value 2.33333
  ]
  edge
  [
    source 746
    target 294
    value 0.333333
  ]
  edge
  [
    source 746
    target 523
    value 0.333333
  ]
  edge
  [
    source 748
    target 747
    value 1
  ]
  edge
  [
    source 751
    target 750
    value 1
  ]
  edge
  [
    source 752
    target 719
    value 0.5
  ]
  edge
  [
    source 753
    target 752
    value 0.5
  ]
  edge
  [
    source 753
    target 719
    value 0.5
  ]
  edge
  [
    source 755
    target 754
    value 1
  ]
  edge
  [
    source 756
    target 34
    value 0.5
  ]
  edge
  [
    source 756
    target 78
    value 0.5
  ]
  edge
  [
    source 757
    target 756
    value 0.5
  ]
  edge
  [
    source 757
    target 69
    value 0.75
  ]
  edge
  [
    source 757
    target 72
    value 0.25
  ]
  edge
  [
    source 758
    target 756
    value 0.5
  ]
  edge
  [
    source 758
    target 757
    value 1.25
  ]
  edge
  [
    source 758
    target 69
    value 0.75
  ]
  edge
  [
    source 758
    target 72
    value 0.25
  ]
  edge
  [
    source 759
    target 756
    value 1
  ]
  edge
  [
    source 759
    target 78
    value 0.5
  ]
  edge
  [
    source 759
    target 371
    value 0.5
  ]
  edge
  [
    source 760
    target 756
    value 1.5
  ]
  edge
  [
    source 760
    target 34
    value 0.5
  ]
  edge
  [
    source 761
    target 756
    value 1.86667
  ]
  edge
  [
    source 761
    target 34
    value 0.333333
  ]
  edge
  [
    source 762
    target 756
    value 0.333333
  ]
  edge
  [
    source 762
    target 761
    value 0.666667
  ]
  edge
  [
    source 762
    target 34
    value 0.333333
  ]
  edge
  [
    source 763
    target 756
    value 0.333333
  ]
  edge
  [
    source 763
    target 761
    value 0.666667
  ]
  edge
  [
    source 763
    target 762
    value 0.666667
  ]
  edge
  [
    source 763
    target 34
    value 0.333333
  ]
  edge
  [
    source 764
    target 756
    value 0.533333
  ]
  edge
  [
    source 764
    target 761
    value 0.533333
  ]
  edge
  [
    source 764
    target 121
    value 0.833333
  ]
  edge
  [
    source 765
    target 756
    value 0.533333
  ]
  edge
  [
    source 765
    target 764
    value 0.866667
  ]
  edge
  [
    source 765
    target 761
    value 0.533333
  ]
  edge
  [
    source 765
    target 121
    value 0.333333
  ]
  edge
  [
    source 767
    target 766
    value 0.333333
  ]
  edge
  [
    source 768
    target 766
    value 0.333333
  ]
  edge
  [
    source 768
    target 767
    value 0.333333
  ]
  edge
  [
    source 769
    target 766
    value 0.333333
  ]
  edge
  [
    source 769
    target 767
    value 0.333333
  ]
  edge
  [
    source 769
    target 768
    value 0.333333
  ]
  edge
  [
    source 770
    target 127
    value 0.2
  ]
  edge
  [
    source 770
    target 126
    value 0.2
  ]
  edge
  [
    source 771
    target 770
    value 0.2
  ]
  edge
  [
    source 771
    target 127
    value 0.2
  ]
  edge
  [
    source 771
    target 126
    value 0.2
  ]
  edge
  [
    source 772
    target 770
    value 0.2
  ]
  edge
  [
    source 772
    target 771
    value 0.2
  ]
  edge
  [
    source 772
    target 127
    value 0.2
  ]
  edge
  [
    source 772
    target 126
    value 0.2
  ]
  edge
  [
    source 773
    target 770
    value 0.2
  ]
  edge
  [
    source 773
    target 771
    value 0.2
  ]
  edge
  [
    source 773
    target 127
    value 0.2
  ]
  edge
  [
    source 773
    target 772
    value 0.2
  ]
  edge
  [
    source 773
    target 126
    value 0.2
  ]
  edge
  [
    source 774
    target 761
    value 1.33333
  ]
  edge
  [
    source 774
    target 657
    value 0.333333
  ]
  edge
  [
    source 774
    target 654
    value 0.333333
  ]
  edge
  [
    source 775
    target 774
    value 1.33333
  ]
  edge
  [
    source 775
    target 761
    value 1.53333
  ]
  edge
  [
    source 775
    target 764
    value 0.2
  ]
  edge
  [
    source 775
    target 756
    value 0.2
  ]
  edge
  [
    source 775
    target 765
    value 0.2
  ]
  edge
  [
    source 776
    target 774
    value 0.333333
  ]
  edge
  [
    source 776
    target 761
    value 0.333333
  ]
  edge
  [
    source 776
    target 775
    value 0.333333
  ]
  edge
  [
    source 778
    target 777
    value 1
  ]
  edge
  [
    source 780
    target 496
    value 0.5
  ]
  edge
  [
    source 781
    target 780
    value 0.5
  ]
  edge
  [
    source 781
    target 496
    value 0.5
  ]
  edge
  [
    source 783
    target 631
    value 1
  ]
  edge
  [
    source 784
    target 631
    value 0.5
  ]
  edge
  [
    source 784
    target 783
    value 0.5
  ]
  edge
  [
    source 786
    target 785
    value 0.5
  ]
  edge
  [
    source 787
    target 785
    value 0.5
  ]
  edge
  [
    source 787
    target 786
    value 0.5
  ]
  edge
  [
    source 788
    target 346
    value 0.333333
  ]
  edge
  [
    source 788
    target 216
    value 0.333333
  ]
  edge
  [
    source 788
    target 516
    value 0.333333
  ]
  edge
  [
    source 789
    target 597
    value 1
  ]
  edge
  [
    source 790
    target 789
    value 1
  ]
  edge
  [
    source 790
    target 597
    value 1
  ]
  edge
  [
    source 792
    target 662
    value 0.333333
  ]
  edge
  [
    source 793
    target 792
    value 0.333333
  ]
  edge
  [
    source 793
    target 662
    value 0.333333
  ]
  edge
  [
    source 794
    target 792
    value 0.333333
  ]
  edge
  [
    source 794
    target 662
    value 0.333333
  ]
  edge
  [
    source 794
    target 793
    value 0.333333
  ]
  edge
  [
    source 795
    target 64
    value 0.25
  ]
  edge
  [
    source 796
    target 795
    value 0.25
  ]
  edge
  [
    source 796
    target 64
    value 0.25
  ]
  edge
  [
    source 797
    target 795
    value 0.25
  ]
  edge
  [
    source 797
    target 796
    value 0.25
  ]
  edge
  [
    source 797
    target 64
    value 0.25
  ]
  edge
  [
    source 798
    target 795
    value 0.25
  ]
  edge
  [
    source 798
    target 796
    value 0.25
  ]
  edge
  [
    source 798
    target 797
    value 0.25
  ]
  edge
  [
    source 798
    target 64
    value 0.25
  ]
  edge
  [
    source 800
    target 799
    value 0.2
  ]
  edge
  [
    source 801
    target 799
    value 0.2
  ]
  edge
  [
    source 801
    target 800
    value 0.2
  ]
  edge
  [
    source 802
    target 799
    value 0.2
  ]
  edge
  [
    source 802
    target 800
    value 0.2
  ]
  edge
  [
    source 802
    target 801
    value 0.2
  ]
  edge
  [
    source 803
    target 799
    value 0.2
  ]
  edge
  [
    source 803
    target 800
    value 0.2
  ]
  edge
  [
    source 803
    target 801
    value 0.2
  ]
  edge
  [
    source 803
    target 802
    value 0.2
  ]
  edge
  [
    source 804
    target 799
    value 0.2
  ]
  edge
  [
    source 804
    target 800
    value 0.2
  ]
  edge
  [
    source 804
    target 801
    value 0.2
  ]
  edge
  [
    source 804
    target 802
    value 0.2
  ]
  edge
  [
    source 804
    target 803
    value 0.2
  ]
  edge
  [
    source 805
    target 62
    value 0.92619
  ]
  edge
  [
    source 805
    target 362
    value 0.2
  ]
  edge
  [
    source 806
    target 805
    value 0.92619
  ]
  edge
  [
    source 806
    target 62
    value 1.25952
  ]
  edge
  [
    source 806
    target 362
    value 0.2
  ]
  edge
  [
    source 807
    target 805
    value 0.92619
  ]
  edge
  [
    source 807
    target 806
    value 0.92619
  ]
  edge
  [
    source 807
    target 62
    value 0.92619
  ]
  edge
  [
    source 807
    target 362
    value 0.2
  ]
  edge
  [
    source 808
    target 805
    value 0.25
  ]
  edge
  [
    source 808
    target 806
    value 0.25
  ]
  edge
  [
    source 808
    target 807
    value 0.25
  ]
  edge
  [
    source 808
    target 62
    value 0.25
  ]
  edge
  [
    source 810
    target 809
    value 1
  ]
  edge
  [
    source 813
    target 812
    value 1
  ]
  edge
  [
    source 815
    target 814
    value 0.5
  ]
  edge
  [
    source 816
    target 814
    value 0.5
  ]
  edge
  [
    source 816
    target 815
    value 0.5
  ]
  edge
  [
    source 818
    target 817
    value 1
  ]
  edge
  [
    source 820
    target 819
    value 1
  ]
  edge
  [
    source 822
    target 821
    value 0.333333
  ]
  edge
  [
    source 823
    target 821
    value 0.333333
  ]
  edge
  [
    source 823
    target 822
    value 0.333333
  ]
  edge
  [
    source 824
    target 821
    value 0.333333
  ]
  edge
  [
    source 824
    target 822
    value 0.333333
  ]
  edge
  [
    source 824
    target 823
    value 0.333333
  ]
  edge
  [
    source 826
    target 825
    value 0.111111
  ]
  edge
  [
    source 827
    target 825
    value 0.111111
  ]
  edge
  [
    source 827
    target 826
    value 0.111111
  ]
  edge
  [
    source 828
    target 825
    value 0.111111
  ]
  edge
  [
    source 828
    target 826
    value 0.111111
  ]
  edge
  [
    source 828
    target 827
    value 0.111111
  ]
  edge
  [
    source 829
    target 825
    value 0.111111
  ]
  edge
  [
    source 829
    target 826
    value 0.111111
  ]
  edge
  [
    source 829
    target 827
    value 0.111111
  ]
  edge
  [
    source 829
    target 828
    value 0.111111
  ]
  edge
  [
    source 830
    target 825
    value 0.111111
  ]
  edge
  [
    source 830
    target 826
    value 0.111111
  ]
  edge
  [
    source 830
    target 827
    value 0.111111
  ]
  edge
  [
    source 830
    target 828
    value 0.111111
  ]
  edge
  [
    source 830
    target 829
    value 0.111111
  ]
  edge
  [
    source 831
    target 825
    value 0.111111
  ]
  edge
  [
    source 831
    target 826
    value 0.111111
  ]
  edge
  [
    source 831
    target 827
    value 0.111111
  ]
  edge
  [
    source 831
    target 828
    value 0.111111
  ]
  edge
  [
    source 831
    target 829
    value 0.111111
  ]
  edge
  [
    source 831
    target 830
    value 0.111111
  ]
  edge
  [
    source 832
    target 825
    value 0.111111
  ]
  edge
  [
    source 832
    target 826
    value 0.111111
  ]
  edge
  [
    source 832
    target 827
    value 0.111111
  ]
  edge
  [
    source 832
    target 828
    value 0.111111
  ]
  edge
  [
    source 832
    target 829
    value 0.111111
  ]
  edge
  [
    source 832
    target 830
    value 0.111111
  ]
  edge
  [
    source 832
    target 831
    value 0.111111
  ]
  edge
  [
    source 833
    target 825
    value 0.111111
  ]
  edge
  [
    source 833
    target 826
    value 0.111111
  ]
  edge
  [
    source 833
    target 827
    value 0.111111
  ]
  edge
  [
    source 833
    target 828
    value 0.111111
  ]
  edge
  [
    source 833
    target 829
    value 0.111111
  ]
  edge
  [
    source 833
    target 830
    value 0.111111
  ]
  edge
  [
    source 833
    target 831
    value 0.111111
  ]
  edge
  [
    source 833
    target 832
    value 0.111111
  ]
  edge
  [
    source 834
    target 825
    value 0.111111
  ]
  edge
  [
    source 834
    target 826
    value 0.111111
  ]
  edge
  [
    source 834
    target 827
    value 0.111111
  ]
  edge
  [
    source 834
    target 828
    value 0.111111
  ]
  edge
  [
    source 834
    target 829
    value 0.111111
  ]
  edge
  [
    source 834
    target 830
    value 0.111111
  ]
  edge
  [
    source 834
    target 831
    value 0.111111
  ]
  edge
  [
    source 834
    target 832
    value 0.111111
  ]
  edge
  [
    source 834
    target 833
    value 0.111111
  ]
  edge
  [
    source 836
    target 835
    value 0.5
  ]
  edge
  [
    source 837
    target 835
    value 0.5
  ]
  edge
  [
    source 837
    target 836
    value 0.5
  ]
  edge
  [
    source 839
    target 34
    value 0.333333
  ]
  edge
  [
    source 839
    target 33
    value 0.333333
  ]
  edge
  [
    source 839
    target 54
    value 0.333333
  ]
  edge
  [
    source 840
    target 34
    value 0.45
  ]
  edge
  [
    source 840
    target 30
    value 0.25
  ]
  edge
  [
    source 840
    target 54
    value 0.45
  ]
  edge
  [
    source 840
    target 33
    value 0.45
  ]
  edge
  [
    source 842
    target 841
    value 1.5
  ]
  edge
  [
    source 843
    target 841
    value 0.5
  ]
  edge
  [
    source 843
    target 842
    value 0.5
  ]
  edge
  [
    source 845
    target 844
    value 0.333333
  ]
  edge
  [
    source 846
    target 844
    value 0.333333
  ]
  edge
  [
    source 846
    target 845
    value 0.333333
  ]
  edge
  [
    source 847
    target 844
    value 0.333333
  ]
  edge
  [
    source 847
    target 845
    value 0.333333
  ]
  edge
  [
    source 847
    target 846
    value 0.333333
  ]
  edge
  [
    source 849
    target 848
    value 1
  ]
  edge
  [
    source 851
    target 850
    value 0.5
  ]
  edge
  [
    source 852
    target 850
    value 0.5
  ]
  edge
  [
    source 852
    target 851
    value 0.5
  ]
  edge
  [
    source 853
    target 646
    value 0.5
  ]
  edge
  [
    source 853
    target 78
    value 0.5
  ]
  edge
  [
    source 856
    target 855
    value 0.5
  ]
  edge
  [
    source 857
    target 855
    value 0.5
  ]
  edge
  [
    source 857
    target 856
    value 0.5
  ]
  edge
  [
    source 859
    target 106
    value 1
  ]
  edge
  [
    source 860
    target 294
    value 0.2
  ]
  edge
  [
    source 861
    target 860
    value 0.5
  ]
  edge
  [
    source 862
    target 860
    value 0.5
  ]
  edge
  [
    source 862
    target 861
    value 0.5
  ]
  edge
  [
    source 863
    target 654
    value 0.5
  ]
  edge
  [
    source 864
    target 863
    value 0.5
  ]
  edge
  [
    source 864
    target 654
    value 0.5
  ]
  edge
  [
    source 865
    target 654
    value 0.5
  ]
  edge
  [
    source 865
    target 34
    value 0.5
  ]
  edge
  [
    source 866
    target 371
    value 0.5
  ]
  edge
  [
    source 867
    target 866
    value 0.5
  ]
  edge
  [
    source 867
    target 371
    value 0.5
  ]
  edge
  [
    source 871
    target 870
    value 0.25
  ]
  edge
  [
    source 872
    target 870
    value 0.25
  ]
  edge
  [
    source 872
    target 871
    value 0.25
  ]
  edge
  [
    source 873
    target 870
    value 0.25
  ]
  edge
  [
    source 873
    target 871
    value 0.25
  ]
  edge
  [
    source 873
    target 872
    value 0.25
  ]
  edge
  [
    source 874
    target 870
    value 0.25
  ]
  edge
  [
    source 874
    target 871
    value 0.25
  ]
  edge
  [
    source 874
    target 872
    value 0.25
  ]
  edge
  [
    source 874
    target 873
    value 0.25
  ]
  edge
  [
    source 878
    target 877
    value 0.25
  ]
  edge
  [
    source 879
    target 877
    value 0.25
  ]
  edge
  [
    source 879
    target 878
    value 0.25
  ]
  edge
  [
    source 880
    target 877
    value 0.25
  ]
  edge
  [
    source 880
    target 878
    value 0.25
  ]
  edge
  [
    source 880
    target 879
    value 0.25
  ]
  edge
  [
    source 881
    target 877
    value 0.25
  ]
  edge
  [
    source 881
    target 878
    value 0.25
  ]
  edge
  [
    source 881
    target 879
    value 0.25
  ]
  edge
  [
    source 881
    target 880
    value 0.25
  ]
  edge
  [
    source 884
    target 883
    value 0.5
  ]
  edge
  [
    source 885
    target 883
    value 0.5
  ]
  edge
  [
    source 885
    target 884
    value 0.5
  ]
  edge
  [
    source 887
    target 886
    value 1
  ]
  edge
  [
    source 889
    target 888
    value 0.5
  ]
  edge
  [
    source 890
    target 888
    value 0.5
  ]
  edge
  [
    source 890
    target 889
    value 0.5
  ]
  edge
  [
    source 892
    target 761
    value 0.2
  ]
  edge
  [
    source 892
    target 764
    value 0.2
  ]
  edge
  [
    source 892
    target 756
    value 0.2
  ]
  edge
  [
    source 892
    target 765
    value 0.2
  ]
  edge
  [
    source 892
    target 775
    value 0.2
  ]
  edge
  [
    source 893
    target 652
    value 0.333333
  ]
  edge
  [
    source 893
    target 654
    value 0.666667
  ]
  edge
  [
    source 893
    target 655
    value 0.333333
  ]
  edge
  [
    source 893
    target 55
    value 0.333333
  ]
  edge
  [
    source 893
    target 56
    value 0.333333
  ]
  edge
  [
    source 894
    target 402
    value 0.333333
  ]
  edge
  [
    source 894
    target 30
    value 0.333333
  ]
  edge
  [
    source 894
    target 327
    value 0.333333
  ]
  edge
  [
    source 896
    target 895
    value 0.25
  ]
  edge
  [
    source 897
    target 895
    value 0.25
  ]
  edge
  [
    source 897
    target 896
    value 0.25
  ]
  edge
  [
    source 898
    target 895
    value 0.25
  ]
  edge
  [
    source 898
    target 896
    value 0.25
  ]
  edge
  [
    source 898
    target 897
    value 0.25
  ]
  edge
  [
    source 899
    target 895
    value 0.25
  ]
  edge
  [
    source 899
    target 896
    value 0.25
  ]
  edge
  [
    source 899
    target 897
    value 0.25
  ]
  edge
  [
    source 899
    target 898
    value 0.25
  ]
  edge
  [
    source 901
    target 900
    value 0.5
  ]
  edge
  [
    source 902
    target 900
    value 0.5
  ]
  edge
  [
    source 902
    target 901
    value 0.5
  ]
  edge
  [
    source 904
    target 903
    value 0.5
  ]
  edge
  [
    source 905
    target 903
    value 0.5
  ]
  edge
  [
    source 905
    target 904
    value 0.5
  ]
  edge
  [
    source 907
    target 906
    value 1
  ]
  edge
  [
    source 908
    target 307
    value 0.25
  ]
  edge
  [
    source 908
    target 265
    value 0.25
  ]
  edge
  [
    source 908
    target 266
    value 0.25
  ]
  edge
  [
    source 908
    target 268
    value 0.25
  ]
  edge
  [
    source 910
    target 909
    value 0.5
  ]
  edge
  [
    source 911
    target 909
    value 0.5
  ]
  edge
  [
    source 911
    target 910
    value 0.5
  ]
  edge
  [
    source 913
    target 912
    value 0.2
  ]
  edge
  [
    source 914
    target 912
    value 0.2
  ]
  edge
  [
    source 914
    target 913
    value 0.342857
  ]
  edge
  [
    source 915
    target 912
    value 0.2
  ]
  edge
  [
    source 915
    target 913
    value 0.342857
  ]
  edge
  [
    source 915
    target 914
    value 0.342857
  ]
  edge
  [
    source 916
    target 912
    value 0.2
  ]
  edge
  [
    source 916
    target 913
    value 0.985714
  ]
  edge
  [
    source 916
    target 914
    value 0.342857
  ]
  edge
  [
    source 916
    target 915
    value 0.342857
  ]
  edge
  [
    source 917
    target 912
    value 0.2
  ]
  edge
  [
    source 917
    target 913
    value 0.2
  ]
  edge
  [
    source 917
    target 914
    value 0.2
  ]
  edge
  [
    source 917
    target 915
    value 0.2
  ]
  edge
  [
    source 917
    target 916
    value 0.2
  ]
  edge
  [
    source 918
    target 171
    value 1
  ]
  edge
  [
    source 921
    target 920
    value 1
  ]
  edge
  [
    source 922
    target 415
    value 1
  ]
  edge
  [
    source 924
    target 923
    value 0.5
  ]
  edge
  [
    source 925
    target 923
    value 0.5
  ]
  edge
  [
    source 925
    target 924
    value 0.5
  ]
  edge
  [
    source 926
    target 177
    value 1
  ]
  edge
  [
    source 927
    target 243
    value 1.25
  ]
  edge
  [
    source 930
    target 929
    value 1
  ]
  edge
  [
    source 931
    target 742
    value 0.7
  ]
  edge
  [
    source 931
    target 293
    value 0.4
  ]
  edge
  [
    source 931
    target 743
    value 0.2
  ]
  edge
  [
    source 931
    target 294
    value 0.4
  ]
  edge
  [
    source 932
    target 931
    value 1.9
  ]
  edge
  [
    source 932
    target 742
    value 0.7
  ]
  edge
  [
    source 932
    target 293
    value 0.4
  ]
  edge
  [
    source 932
    target 743
    value 0.2
  ]
  edge
  [
    source 932
    target 294
    value 0.4
  ]
  edge
  [
    source 933
    target 931
    value 1
  ]
  edge
  [
    source 934
    target 55
    value 0.5
  ]
  edge
  [
    source 934
    target 56
    value 0.5
  ]
  edge
  [
    source 935
    target 117
    value 0.25
  ]
  edge
  [
    source 936
    target 935
    value 0.25
  ]
  edge
  [
    source 936
    target 117
    value 0.25
  ]
  edge
  [
    source 937
    target 935
    value 0.25
  ]
  edge
  [
    source 937
    target 936
    value 0.25
  ]
  edge
  [
    source 937
    target 117
    value 0.25
  ]
  edge
  [
    source 938
    target 935
    value 0.25
  ]
  edge
  [
    source 938
    target 936
    value 0.25
  ]
  edge
  [
    source 938
    target 937
    value 0.25
  ]
  edge
  [
    source 938
    target 117
    value 0.25
  ]
  edge
  [
    source 940
    target 478
    value 1
  ]
  edge
  [
    source 942
    target 941
    value 0.5
  ]
  edge
  [
    source 943
    target 941
    value 0.5
  ]
  edge
  [
    source 943
    target 942
    value 0.5
  ]
  edge
  [
    source 944
    target 263
    value 0.2
  ]
  edge
  [
    source 944
    target 265
    value 0.2
  ]
  edge
  [
    source 944
    target 266
    value 0.2
  ]
  edge
  [
    source 944
    target 268
    value 0.2
  ]
  edge
  [
    source 945
    target 263
    value 0.2
  ]
  edge
  [
    source 945
    target 265
    value 0.2
  ]
  edge
  [
    source 945
    target 266
    value 0.2
  ]
  edge
  [
    source 945
    target 944
    value 0.2
  ]
  edge
  [
    source 945
    target 268
    value 0.2
  ]
  edge
  [
    source 946
    target 1
    value 1
  ]
  edge
  [
    source 948
    target 947
    value 1
  ]
  edge
  [
    source 950
    target 949
    value 1
  ]
  edge
  [
    source 952
    target 951
    value 1.16667
  ]
  edge
  [
    source 953
    target 951
    value 1.16667
  ]
  edge
  [
    source 953
    target 952
    value 1.16667
  ]
  edge
  [
    source 954
    target 951
    value 0.666667
  ]
  edge
  [
    source 954
    target 953
    value 0.666667
  ]
  edge
  [
    source 954
    target 952
    value 0.666667
  ]
  edge
  [
    source 955
    target 194
    value 0.5
  ]
  edge
  [
    source 956
    target 955
    value 0.5
  ]
  edge
  [
    source 956
    target 194
    value 1.08333
  ]
  edge
  [
    source 958
    target 957
    value 0.5
  ]
  edge
  [
    source 959
    target 957
    value 0.5
  ]
  edge
  [
    source 959
    target 958
    value 0.5
  ]
  edge
  [
    source 961
    target 960
    value 0.5
  ]
  edge
  [
    source 962
    target 960
    value 0.5
  ]
  edge
  [
    source 962
    target 961
    value 0.5
  ]
  edge
  [
    source 963
    target 517
    value 0.333333
  ]
  edge
  [
    source 963
    target 151
    value 0.333333
  ]
  edge
  [
    source 964
    target 963
    value 0.333333
  ]
  edge
  [
    source 964
    target 517
    value 0.333333
  ]
  edge
  [
    source 964
    target 151
    value 0.333333
  ]
  edge
  [
    source 966
    target 965
    value 0.2
  ]
  edge
  [
    source 967
    target 965
    value 0.2
  ]
  edge
  [
    source 967
    target 966
    value 0.2
  ]
  edge
  [
    source 968
    target 965
    value 0.2
  ]
  edge
  [
    source 968
    target 966
    value 0.2
  ]
  edge
  [
    source 968
    target 967
    value 0.2
  ]
  edge
  [
    source 969
    target 965
    value 0.2
  ]
  edge
  [
    source 969
    target 966
    value 0.2
  ]
  edge
  [
    source 969
    target 967
    value 0.2
  ]
  edge
  [
    source 969
    target 968
    value 0.2
  ]
  edge
  [
    source 970
    target 965
    value 0.2
  ]
  edge
  [
    source 970
    target 966
    value 0.2
  ]
  edge
  [
    source 970
    target 967
    value 0.2
  ]
  edge
  [
    source 970
    target 968
    value 0.2
  ]
  edge
  [
    source 970
    target 969
    value 0.2
  ]
  edge
  [
    source 973
    target 972
    value 1
  ]
  edge
  [
    source 973
    target 300
    value 1
  ]
  edge
  [
    source 975
    target 974
    value 0.5
  ]
  edge
  [
    source 976
    target 974
    value 0.5
  ]
  edge
  [
    source 976
    target 975
    value 0.5
  ]
  edge
  [
    source 976
    target 88
    value 1
  ]
  edge
  [
    source 977
    target 758
    value 0.25
  ]
  edge
  [
    source 977
    target 757
    value 0.25
  ]
  edge
  [
    source 977
    target 69
    value 0.25
  ]
  edge
  [
    source 977
    target 72
    value 0.25
  ]
  edge
  [
    source 979
    target 978
    value 1
  ]
  edge
  [
    source 981
    target 980
    value 0.5
  ]
  edge
  [
    source 982
    target 980
    value 0.5
  ]
  edge
  [
    source 982
    target 981
    value 0.5
  ]
  edge
  [
    source 984
    target 983
    value 1
  ]
  edge
  [
    source 984
    target 473
    value 2.16667
  ]
  edge
  [
    source 984
    target 472
    value 0.333333
  ]
  edge
  [
    source 985
    target 983
    value 0.5
  ]
  edge
  [
    source 985
    target 984
    value 0.833333
  ]
  edge
  [
    source 985
    target 473
    value 0.333333
  ]
  edge
  [
    source 986
    target 983
    value 0.5
  ]
  edge
  [
    source 986
    target 984
    value 0.5
  ]
  edge
  [
    source 988
    target 987
    value 1
  ]
  edge
  [
    source 989
    target 973
    value 1
  ]
  edge
  [
    source 991
    target 88
    value 2
  ]
  edge
  [
    source 993
    target 992
    value 1
  ]
  edge
  [
    source 995
    target 994
    value 0.25
  ]
  edge
  [
    source 996
    target 994
    value 0.25
  ]
  edge
  [
    source 996
    target 995
    value 0.25
  ]
  edge
  [
    source 997
    target 994
    value 0.25
  ]
  edge
  [
    source 997
    target 995
    value 0.25
  ]
  edge
  [
    source 997
    target 996
    value 0.25
  ]
  edge
  [
    source 998
    target 994
    value 0.25
  ]
  edge
  [
    source 998
    target 995
    value 0.25
  ]
  edge
  [
    source 998
    target 996
    value 0.25
  ]
  edge
  [
    source 998
    target 997
    value 0.25
  ]
  edge
  [
    source 1000
    target 999
    value 1
  ]
  edge
  [
    source 1000
    target 913
    value 0.142857
  ]
  edge
  [
    source 1000
    target 916
    value 0.142857
  ]
  edge
  [
    source 1000
    target 255
    value 0.5
  ]
  edge
  [
    source 1000
    target 254
    value 0.5
  ]
  edge
  [
    source 1002
    target 973
    value 0.833333
  ]
  edge
  [
    source 1003
    target 1002
    value 0.833333
  ]
  edge
  [
    source 1003
    target 973
    value 0.833333
  ]
  edge
  [
    source 1004
    target 1002
    value 0.333333
  ]
  edge
  [
    source 1004
    target 1003
    value 0.333333
  ]
  edge
  [
    source 1004
    target 973
    value 0.333333
  ]
  edge
  [
    source 1005
    target 78
    value 1
  ]
  edge
  [
    source 1007
    target 1006
    value 1
  ]
  edge
  [
    source 1008
    target 51
    value 0.5
  ]
  edge
  [
    source 1008
    target 33
    value 0.5
  ]
  edge
  [
    source 1010
    target 1009
    value 1
  ]
  edge
  [
    source 1012
    target 1011
    value 1
  ]
  edge
  [
    source 1014
    target 1013
    value 1
  ]
  edge
  [
    source 1016
    target 62
    value 1.33333
  ]
  edge
  [
    source 1016
    target 806
    value 0.333333
  ]
  edge
  [
    source 1018
    target 1017
    value 1.2
  ]
  edge
  [
    source 1021
    target 127
    value 0.25
  ]
  edge
  [
    source 1021
    target 128
    value 0.75
  ]
  edge
  [
    source 1022
    target 127
    value 0.25
  ]
  edge
  [
    source 1022
    target 128
    value 0.25
  ]
  edge
  [
    source 1022
    target 1021
    value 0.25
  ]
  edge
  [
    source 1023
    target 127
    value 0.25
  ]
  edge
  [
    source 1023
    target 128
    value 1.75
  ]
  edge
  [
    source 1023
    target 1021
    value 0.75
  ]
  edge
  [
    source 1023
    target 1022
    value 0.25
  ]
  edge
  [
    source 1024
    target 53
    value 0.5
  ]
  edge
  [
    source 1025
    target 1024
    value 0.5
  ]
  edge
  [
    source 1025
    target 53
    value 0.5
  ]
  edge
  [
    source 1026
    target 303
    value 0.333333
  ]
  edge
  [
    source 1027
    target 1026
    value 1
  ]
  edge
  [
    source 1028
    target 746
    value 0.333333
  ]
  edge
  [
    source 1028
    target 294
    value 0.333333
  ]
  edge
  [
    source 1029
    target 1028
    value 0.333333
  ]
  edge
  [
    source 1029
    target 746
    value 0.333333
  ]
  edge
  [
    source 1029
    target 294
    value 0.333333
  ]
  edge
  [
    source 1030
    target 550
    value 0.5
  ]
  edge
  [
    source 1030
    target 121
    value 0.5
  ]
  edge
  [
    source 1032
    target 1031
    value 1
  ]
  edge
  [
    source 1034
    target 1033
    value 1
  ]
  edge
  [
    source 1036
    target 1035
    value 1
  ]
  edge
  [
    source 1037
    target 1035
    value 0.5
  ]
  edge
  [
    source 1038
    target 1035
    value 0.5
  ]
  edge
  [
    source 1038
    target 1037
    value 0.5
  ]
  edge
  [
    source 1039
    target 308
    value 0.5
  ]
  edge
  [
    source 1040
    target 1039
    value 0.5
  ]
  edge
  [
    source 1040
    target 308
    value 1.5
  ]
  edge
  [
    source 1041
    target 224
    value 0.333333
  ]
  edge
  [
    source 1041
    target 218
    value 0.333333
  ]
  edge
  [
    source 1041
    target 216
    value 0.333333
  ]
  edge
  [
    source 1043
    target 1042
    value 0.5
  ]
  edge
  [
    source 1044
    target 1042
    value 0.5
  ]
  edge
  [
    source 1044
    target 1043
    value 0.5
  ]
  edge
  [
    source 1045
    target 1010
    value 1
  ]
  edge
  [
    source 1046
    target 482
    value 1
  ]
  edge
  [
    source 1047
    target 12
    value 0.25
  ]
  edge
  [
    source 1048
    target 1047
    value 0.25
  ]
  edge
  [
    source 1048
    target 12
    value 0.25
  ]
  edge
  [
    source 1049
    target 1047
    value 0.25
  ]
  edge
  [
    source 1049
    target 1048
    value 0.25
  ]
  edge
  [
    source 1049
    target 12
    value 0.25
  ]
  edge
  [
    source 1050
    target 1047
    value 0.25
  ]
  edge
  [
    source 1050
    target 1048
    value 0.25
  ]
  edge
  [
    source 1050
    target 1049
    value 0.25
  ]
  edge
  [
    source 1050
    target 12
    value 0.25
  ]
  edge
  [
    source 1053
    target 1052
    value 1
  ]
  edge
  [
    source 1055
    target 1054
    value 1
  ]
  edge
  [
    source 1056
    target 1054
    value 0.333333
  ]
  edge
  [
    source 1057
    target 1054
    value 0.333333
  ]
  edge
  [
    source 1057
    target 1056
    value 0.333333
  ]
  edge
  [
    source 1058
    target 1054
    value 0.333333
  ]
  edge
  [
    source 1058
    target 1056
    value 0.333333
  ]
  edge
  [
    source 1058
    target 1057
    value 0.333333
  ]
  edge
  [
    source 1061
    target 1060
    value 0.111111
  ]
  edge
  [
    source 1062
    target 1060
    value 0.111111
  ]
  edge
  [
    source 1062
    target 1061
    value 0.111111
  ]
  edge
  [
    source 1063
    target 1060
    value 0.111111
  ]
  edge
  [
    source 1063
    target 1061
    value 0.111111
  ]
  edge
  [
    source 1063
    target 1062
    value 0.111111
  ]
  edge
  [
    source 1064
    target 1060
    value 0.111111
  ]
  edge
  [
    source 1064
    target 1061
    value 0.111111
  ]
  edge
  [
    source 1064
    target 1062
    value 0.111111
  ]
  edge
  [
    source 1064
    target 1063
    value 0.111111
  ]
  edge
  [
    source 1065
    target 1060
    value 0.111111
  ]
  edge
  [
    source 1065
    target 1061
    value 0.111111
  ]
  edge
  [
    source 1065
    target 1062
    value 0.111111
  ]
  edge
  [
    source 1065
    target 1063
    value 0.111111
  ]
  edge
  [
    source 1065
    target 1064
    value 0.111111
  ]
  edge
  [
    source 1066
    target 1060
    value 0.111111
  ]
  edge
  [
    source 1066
    target 1061
    value 0.111111
  ]
  edge
  [
    source 1066
    target 1062
    value 0.111111
  ]
  edge
  [
    source 1066
    target 1063
    value 0.111111
  ]
  edge
  [
    source 1066
    target 1064
    value 0.111111
  ]
  edge
  [
    source 1066
    target 1065
    value 0.111111
  ]
  edge
  [
    source 1067
    target 1060
    value 0.111111
  ]
  edge
  [
    source 1067
    target 1061
    value 0.111111
  ]
  edge
  [
    source 1067
    target 1062
    value 0.111111
  ]
  edge
  [
    source 1067
    target 1063
    value 0.111111
  ]
  edge
  [
    source 1067
    target 1064
    value 0.111111
  ]
  edge
  [
    source 1067
    target 1065
    value 0.111111
  ]
  edge
  [
    source 1067
    target 1066
    value 0.111111
  ]
  edge
  [
    source 1068
    target 1060
    value 0.111111
  ]
  edge
  [
    source 1068
    target 1061
    value 0.111111
  ]
  edge
  [
    source 1068
    target 1062
    value 0.111111
  ]
  edge
  [
    source 1068
    target 1063
    value 0.111111
  ]
  edge
  [
    source 1068
    target 1064
    value 0.111111
  ]
  edge
  [
    source 1068
    target 1065
    value 0.111111
  ]
  edge
  [
    source 1068
    target 1066
    value 0.111111
  ]
  edge
  [
    source 1068
    target 1067
    value 0.111111
  ]
  edge
  [
    source 1069
    target 1060
    value 0.111111
  ]
  edge
  [
    source 1069
    target 1061
    value 0.111111
  ]
  edge
  [
    source 1069
    target 1062
    value 0.111111
  ]
  edge
  [
    source 1069
    target 1063
    value 0.111111
  ]
  edge
  [
    source 1069
    target 1064
    value 0.111111
  ]
  edge
  [
    source 1069
    target 1065
    value 0.111111
  ]
  edge
  [
    source 1069
    target 1066
    value 0.111111
  ]
  edge
  [
    source 1069
    target 1067
    value 0.111111
  ]
  edge
  [
    source 1069
    target 1068
    value 0.111111
  ]
  edge
  [
    source 1070
    target 806
    value 0.142857
  ]
  edge
  [
    source 1070
    target 805
    value 0.142857
  ]
  edge
  [
    source 1070
    target 807
    value 0.142857
  ]
  edge
  [
    source 1070
    target 62
    value 0.142857
  ]
  edge
  [
    source 1071
    target 806
    value 0.67619
  ]
  edge
  [
    source 1071
    target 805
    value 0.342857
  ]
  edge
  [
    source 1071
    target 807
    value 0.342857
  ]
  edge
  [
    source 1071
    target 1070
    value 0.142857
  ]
  edge
  [
    source 1071
    target 62
    value 0.67619
  ]
  edge
  [
    source 1071
    target 362
    value 0.2
  ]
  edge
  [
    source 1071
    target 1016
    value 0.333333
  ]
  edge
  [
    source 1072
    target 806
    value 0.142857
  ]
  edge
  [
    source 1072
    target 805
    value 0.142857
  ]
  edge
  [
    source 1072
    target 807
    value 0.142857
  ]
  edge
  [
    source 1072
    target 1070
    value 0.142857
  ]
  edge
  [
    source 1072
    target 1071
    value 0.142857
  ]
  edge
  [
    source 1072
    target 62
    value 0.142857
  ]
  edge
  [
    source 1073
    target 806
    value 0.142857
  ]
  edge
  [
    source 1073
    target 805
    value 0.142857
  ]
  edge
  [
    source 1073
    target 807
    value 0.142857
  ]
  edge
  [
    source 1073
    target 1070
    value 0.142857
  ]
  edge
  [
    source 1073
    target 1071
    value 0.142857
  ]
  edge
  [
    source 1073
    target 1072
    value 0.142857
  ]
  edge
  [
    source 1073
    target 62
    value 0.142857
  ]
  edge
  [
    source 1074
    target 227
    value 1
  ]
  edge
  [
    source 1079
    target 1078
    value 1
  ]
  edge
  [
    source 1081
    target 281
    value 2
  ]
  edge
  [
    source 1082
    target 69
    value 0.5
  ]
  edge
  [
    source 1083
    target 1082
    value 0.5
  ]
  edge
  [
    source 1083
    target 69
    value 0.5
  ]
  edge
  [
    source 1084
    target 0
    value 0.5
  ]
  edge
  [
    source 1084
    target 1
    value 0.5
  ]
  edge
  [
    source 1086
    target 516
    value 0.5
  ]
  edge
  [
    source 1087
    target 516
    value 2.5
  ]
  edge
  [
    source 1087
    target 1086
    value 0.5
  ]
  edge
  [
    source 1088
    target 516
    value 1
  ]
  edge
  [
    source 1088
    target 1087
    value 0.5
  ]
  edge
  [
    source 1088
    target 151
    value 0.5
  ]
  edge
  [
    source 1089
    target 516
    value 0.5
  ]
  edge
  [
    source 1089
    target 1087
    value 0.5
  ]
  edge
  [
    source 1091
    target 473
    value 0.333333
  ]
  edge
  [
    source 1091
    target 472
    value 0.333333
  ]
  edge
  [
    source 1091
    target 984
    value 0.333333
  ]
  edge
  [
    source 1092
    target 473
    value 0.833333
  ]
  edge
  [
    source 1092
    target 984
    value 0.833333
  ]
  edge
  [
    source 1092
    target 985
    value 0.333333
  ]
  edge
  [
    source 1094
    target 1093
    value 0.333333
  ]
  edge
  [
    source 1095
    target 1093
    value 0.333333
  ]
  edge
  [
    source 1095
    target 1094
    value 0.333333
  ]
  edge
  [
    source 1096
    target 1093
    value 0.333333
  ]
  edge
  [
    source 1096
    target 1094
    value 0.333333
  ]
  edge
  [
    source 1096
    target 1095
    value 0.333333
  ]
  edge
  [
    source 1098
    target 1097
    value 0.5
  ]
  edge
  [
    source 1099
    target 1097
    value 0.5
  ]
  edge
  [
    source 1099
    target 1098
    value 0.5
  ]
  edge
  [
    source 1102
    target 1101
    value 0.5
  ]
  edge
  [
    source 1103
    target 1101
    value 0.5
  ]
  edge
  [
    source 1103
    target 1102
    value 0.5
  ]
  edge
  [
    source 1106
    target 1105
    value 0.125
  ]
  edge
  [
    source 1107
    target 1105
    value 0.125
  ]
  edge
  [
    source 1107
    target 1106
    value 0.125
  ]
  edge
  [
    source 1108
    target 1105
    value 0.125
  ]
  edge
  [
    source 1108
    target 1106
    value 0.125
  ]
  edge
  [
    source 1108
    target 1107
    value 0.125
  ]
  edge
  [
    source 1109
    target 1105
    value 0.125
  ]
  edge
  [
    source 1109
    target 1106
    value 0.125
  ]
  edge
  [
    source 1109
    target 1107
    value 0.125
  ]
  edge
  [
    source 1109
    target 1108
    value 0.125
  ]
  edge
  [
    source 1110
    target 1105
    value 0.125
  ]
  edge
  [
    source 1110
    target 1106
    value 0.125
  ]
  edge
  [
    source 1110
    target 1107
    value 0.125
  ]
  edge
  [
    source 1110
    target 1108
    value 0.125
  ]
  edge
  [
    source 1110
    target 1109
    value 0.125
  ]
  edge
  [
    source 1111
    target 1105
    value 0.125
  ]
  edge
  [
    source 1111
    target 1106
    value 0.125
  ]
  edge
  [
    source 1111
    target 1107
    value 0.125
  ]
  edge
  [
    source 1111
    target 1108
    value 0.125
  ]
  edge
  [
    source 1111
    target 1109
    value 0.125
  ]
  edge
  [
    source 1111
    target 1110
    value 0.125
  ]
  edge
  [
    source 1112
    target 1105
    value 0.125
  ]
  edge
  [
    source 1112
    target 1106
    value 0.125
  ]
  edge
  [
    source 1112
    target 1107
    value 0.125
  ]
  edge
  [
    source 1112
    target 1108
    value 0.125
  ]
  edge
  [
    source 1112
    target 1109
    value 0.125
  ]
  edge
  [
    source 1112
    target 1110
    value 0.125
  ]
  edge
  [
    source 1112
    target 1111
    value 0.125
  ]
  edge
  [
    source 1113
    target 1105
    value 0.125
  ]
  edge
  [
    source 1113
    target 1106
    value 0.125
  ]
  edge
  [
    source 1113
    target 1107
    value 0.125
  ]
  edge
  [
    source 1113
    target 1108
    value 0.125
  ]
  edge
  [
    source 1113
    target 1109
    value 0.125
  ]
  edge
  [
    source 1113
    target 1110
    value 0.125
  ]
  edge
  [
    source 1113
    target 1111
    value 0.125
  ]
  edge
  [
    source 1113
    target 1112
    value 0.125
  ]
  edge
  [
    source 1115
    target 1114
    value 1
  ]
  edge
  [
    source 1117
    target 1116
    value 0.25
  ]
  edge
  [
    source 1118
    target 1116
    value 0.25
  ]
  edge
  [
    source 1118
    target 1117
    value 0.25
  ]
  edge
  [
    source 1119
    target 1116
    value 0.25
  ]
  edge
  [
    source 1119
    target 1117
    value 0.25
  ]
  edge
  [
    source 1119
    target 1118
    value 0.25
  ]
  edge
  [
    source 1120
    target 1116
    value 0.25
  ]
  edge
  [
    source 1120
    target 1117
    value 0.25
  ]
  edge
  [
    source 1120
    target 1118
    value 0.25
  ]
  edge
  [
    source 1120
    target 1119
    value 0.25
  ]
  edge
  [
    source 1121
    target 78
    value 0.5
  ]
  edge
  [
    source 1122
    target 78
    value 0.5
  ]
  edge
  [
    source 1122
    target 1121
    value 0.5
  ]
  edge
  [
    source 1123
    target 78
    value 0.5
  ]
  edge
  [
    source 1123
    target 756
    value 0.5
  ]
  edge
  [
    source 1124
    target 247
    value 0.333333
  ]
  edge
  [
    source 1124
    target 415
    value 0.333333
  ]
  edge
  [
    source 1125
    target 1124
    value 0.333333
  ]
  edge
  [
    source 1125
    target 247
    value 0.333333
  ]
  edge
  [
    source 1125
    target 415
    value 0.333333
  ]
  edge
  [
    source 1128
    target 1127
    value 1
  ]
  edge
  [
    source 1129
    target 976
    value 1
  ]
  edge
  [
    source 1130
    target 657
    value 0.333333
  ]
  edge
  [
    source 1130
    target 774
    value 0.333333
  ]
  edge
  [
    source 1130
    target 654
    value 0.833333
  ]
  edge
  [
    source 1130
    target 34
    value 0.5
  ]
  edge
  [
    source 1132
    target 1131
    value 1
  ]
  edge
  [
    source 1134
    target 1133
    value 1
  ]
  edge
  [
    source 1135
    target 956
    value 0.583333
  ]
  edge
  [
    source 1135
    target 194
    value 0.583333
  ]
  edge
  [
    source 1136
    target 1135
    value 0.25
  ]
  edge
  [
    source 1136
    target 956
    value 0.25
  ]
  edge
  [
    source 1136
    target 194
    value 0.25
  ]
  edge
  [
    source 1137
    target 1135
    value 0.25
  ]
  edge
  [
    source 1137
    target 1136
    value 0.25
  ]
  edge
  [
    source 1137
    target 956
    value 0.25
  ]
  edge
  [
    source 1137
    target 194
    value 0.25
  ]
  edge
  [
    source 1138
    target 1135
    value 0.333333
  ]
  edge
  [
    source 1138
    target 194
    value 0.333333
  ]
  edge
  [
    source 1138
    target 956
    value 0.333333
  ]
  edge
  [
    source 1140
    target 1139
    value 1
  ]
  edge
  [
    source 1142
    target 1141
    value 1
  ]
  edge
  [
    source 1145
    target 221
    value 0.333333
  ]
  edge
  [
    source 1145
    target 343
    value 1.47619
  ]
  edge
  [
    source 1145
    target 219
    value 2.14286
  ]
  edge
  [
    source 1145
    target 697
    value 0.142857
  ]
  edge
  [
    source 1147
    target 1146
    value 0.25
  ]
  edge
  [
    source 1148
    target 1146
    value 0.25
  ]
  edge
  [
    source 1148
    target 1147
    value 0.25
  ]
  edge
  [
    source 1149
    target 1146
    value 0.25
  ]
  edge
  [
    source 1149
    target 1147
    value 0.25
  ]
  edge
  [
    source 1149
    target 1148
    value 0.25
  ]
  edge
  [
    source 1150
    target 1146
    value 0.25
  ]
  edge
  [
    source 1150
    target 1147
    value 0.25
  ]
  edge
  [
    source 1150
    target 1148
    value 0.25
  ]
  edge
  [
    source 1150
    target 1149
    value 0.25
  ]
  edge
  [
    source 1153
    target 1152
    value 0.125
  ]
  edge
  [
    source 1154
    target 1152
    value 0.125
  ]
  edge
  [
    source 1154
    target 1153
    value 0.125
  ]
  edge
  [
    source 1155
    target 1152
    value 0.125
  ]
  edge
  [
    source 1155
    target 1153
    value 0.125
  ]
  edge
  [
    source 1155
    target 1154
    value 0.125
  ]
  edge
  [
    source 1156
    target 1152
    value 0.125
  ]
  edge
  [
    source 1156
    target 1153
    value 0.125
  ]
  edge
  [
    source 1156
    target 1154
    value 0.125
  ]
  edge
  [
    source 1156
    target 1155
    value 0.125
  ]
  edge
  [
    source 1157
    target 1152
    value 0.125
  ]
  edge
  [
    source 1157
    target 1153
    value 0.125
  ]
  edge
  [
    source 1157
    target 1154
    value 0.125
  ]
  edge
  [
    source 1157
    target 1155
    value 0.125
  ]
  edge
  [
    source 1157
    target 1156
    value 0.125
  ]
  edge
  [
    source 1158
    target 1152
    value 0.125
  ]
  edge
  [
    source 1158
    target 1153
    value 0.125
  ]
  edge
  [
    source 1158
    target 1154
    value 0.125
  ]
  edge
  [
    source 1158
    target 1155
    value 0.125
  ]
  edge
  [
    source 1158
    target 1156
    value 0.125
  ]
  edge
  [
    source 1158
    target 1157
    value 0.125
  ]
  edge
  [
    source 1159
    target 1152
    value 0.125
  ]
  edge
  [
    source 1159
    target 1153
    value 0.125
  ]
  edge
  [
    source 1159
    target 1154
    value 0.125
  ]
  edge
  [
    source 1159
    target 1155
    value 0.125
  ]
  edge
  [
    source 1159
    target 1156
    value 0.125
  ]
  edge
  [
    source 1159
    target 1157
    value 0.125
  ]
  edge
  [
    source 1159
    target 1158
    value 0.125
  ]
  edge
  [
    source 1160
    target 1152
    value 0.125
  ]
  edge
  [
    source 1160
    target 1153
    value 0.125
  ]
  edge
  [
    source 1160
    target 1154
    value 0.125
  ]
  edge
  [
    source 1160
    target 1155
    value 0.125
  ]
  edge
  [
    source 1160
    target 1156
    value 0.125
  ]
  edge
  [
    source 1160
    target 1157
    value 0.125
  ]
  edge
  [
    source 1160
    target 1158
    value 0.125
  ]
  edge
  [
    source 1160
    target 1159
    value 0.125
  ]
  edge
  [
    source 1162
    target 114
    value 0.5
  ]
  edge
  [
    source 1162
    target 186
    value 1.25
  ]
  edge
  [
    source 1163
    target 114
    value 0.5
  ]
  edge
  [
    source 1163
    target 1162
    value 0.5
  ]
  edge
  [
    source 1165
    target 1164
    value 1
  ]
  edge
  [
    source 1166
    target 259
    value 0.333333
  ]
  edge
  [
    source 1166
    target 258
    value 0.333333
  ]
  edge
  [
    source 1167
    target 259
    value 0.333333
  ]
  edge
  [
    source 1167
    target 258
    value 0.333333
  ]
  edge
  [
    source 1167
    target 1166
    value 0.333333
  ]
  edge
  [
    source 1169
    target 1168
    value 1
  ]
  edge
  [
    source 1170
    target 820
    value 1
  ]
  edge
  [
    source 1172
    target 78
    value 1
  ]
  edge
  [
    source 1175
    target 931
    value 0.5
  ]
  edge
  [
    source 1176
    target 1175
    value 0.5
  ]
  edge
  [
    source 1176
    target 931
    value 0.5
  ]
  edge
  [
    source 1177
    target 150
    value 0.5
  ]
  edge
  [
    source 1177
    target 96
    value 0.5
  ]
  edge
  [
    source 1178
    target 150
    value 0.833333
  ]
  edge
  [
    source 1178
    target 281
    value 0.833333
  ]
  edge
  [
    source 1180
    target 589
    value 0.25
  ]
  edge
  [
    source 1180
    target 590
    value 0.25
  ]
  edge
  [
    source 1180
    target 591
    value 0.25
  ]
  edge
  [
    source 1181
    target 1180
    value 0.25
  ]
  edge
  [
    source 1181
    target 589
    value 0.25
  ]
  edge
  [
    source 1181
    target 590
    value 0.25
  ]
  edge
  [
    source 1181
    target 591
    value 0.25
  ]
  edge
  [
    source 1182
    target 302
    value 1
  ]
  edge
  [
    source 1185
    target 1184
    value 0.5
  ]
  edge
  [
    source 1186
    target 1184
    value 0.5
  ]
  edge
  [
    source 1186
    target 1185
    value 0.5
  ]
  edge
  [
    source 1189
    target 327
    value 0.5
  ]
  edge
  [
    source 1189
    target 328
    value 0.5
  ]
  edge
  [
    source 1190
    target 54
    value 0.2
  ]
  edge
  [
    source 1190
    target 34
    value 0.2
  ]
  edge
  [
    source 1190
    target 840
    value 0.2
  ]
  edge
  [
    source 1190
    target 33
    value 0.2
  ]
  edge
  [
    source 1191
    target 1190
    value 0.2
  ]
  edge
  [
    source 1191
    target 54
    value 0.2
  ]
  edge
  [
    source 1191
    target 34
    value 0.2
  ]
  edge
  [
    source 1191
    target 840
    value 0.2
  ]
  edge
  [
    source 1191
    target 33
    value 0.2
  ]
  edge
  [
    source 1194
    target 1193
    value 1
  ]
  edge
  [
    source 1195
    target 78
    value 0.333333
  ]
  edge
  [
    source 1196
    target 1195
    value 0.333333
  ]
  edge
  [
    source 1196
    target 78
    value 0.333333
  ]
  edge
  [
    source 1197
    target 1195
    value 0.333333
  ]
  edge
  [
    source 1197
    target 1196
    value 0.333333
  ]
  edge
  [
    source 1197
    target 78
    value 0.333333
  ]
  edge
  [
    source 1199
    target 1198
    value 0.5
  ]
  edge
  [
    source 1200
    target 1198
    value 0.5
  ]
  edge
  [
    source 1200
    target 1199
    value 0.5
  ]
  edge
  [
    source 1201
    target 913
    value 0.785714
  ]
  edge
  [
    source 1201
    target 916
    value 1.11905
  ]
  edge
  [
    source 1201
    target 1000
    value 0.142857
  ]
  edge
  [
    source 1201
    target 914
    value 0.142857
  ]
  edge
  [
    source 1201
    target 915
    value 0.142857
  ]
  edge
  [
    source 1202
    target 913
    value 0.142857
  ]
  edge
  [
    source 1202
    target 916
    value 0.142857
  ]
  edge
  [
    source 1202
    target 1201
    value 0.142857
  ]
  edge
  [
    source 1202
    target 1000
    value 0.142857
  ]
  edge
  [
    source 1203
    target 913
    value 0.142857
  ]
  edge
  [
    source 1203
    target 916
    value 0.142857
  ]
  edge
  [
    source 1203
    target 1201
    value 0.142857
  ]
  edge
  [
    source 1203
    target 1202
    value 0.142857
  ]
  edge
  [
    source 1203
    target 1000
    value 0.142857
  ]
  edge
  [
    source 1204
    target 913
    value 0.142857
  ]
  edge
  [
    source 1204
    target 916
    value 0.142857
  ]
  edge
  [
    source 1204
    target 1201
    value 0.142857
  ]
  edge
  [
    source 1204
    target 1202
    value 0.142857
  ]
  edge
  [
    source 1204
    target 1203
    value 0.142857
  ]
  edge
  [
    source 1204
    target 1000
    value 0.142857
  ]
  edge
  [
    source 1205
    target 913
    value 0.142857
  ]
  edge
  [
    source 1205
    target 916
    value 0.142857
  ]
  edge
  [
    source 1205
    target 1201
    value 0.142857
  ]
  edge
  [
    source 1205
    target 1202
    value 0.142857
  ]
  edge
  [
    source 1205
    target 1203
    value 0.142857
  ]
  edge
  [
    source 1205
    target 1204
    value 0.142857
  ]
  edge
  [
    source 1205
    target 1000
    value 0.142857
  ]
  edge
  [
    source 1206
    target 913
    value 0.142857
  ]
  edge
  [
    source 1206
    target 916
    value 0.142857
  ]
  edge
  [
    source 1206
    target 1201
    value 0.142857
  ]
  edge
  [
    source 1206
    target 914
    value 0.142857
  ]
  edge
  [
    source 1206
    target 915
    value 0.142857
  ]
  edge
  [
    source 1207
    target 913
    value 0.142857
  ]
  edge
  [
    source 1207
    target 1206
    value 0.142857
  ]
  edge
  [
    source 1207
    target 916
    value 0.142857
  ]
  edge
  [
    source 1207
    target 1201
    value 0.142857
  ]
  edge
  [
    source 1207
    target 914
    value 0.142857
  ]
  edge
  [
    source 1207
    target 915
    value 0.142857
  ]
  edge
  [
    source 1208
    target 913
    value 0.142857
  ]
  edge
  [
    source 1208
    target 1206
    value 0.142857
  ]
  edge
  [
    source 1208
    target 916
    value 0.142857
  ]
  edge
  [
    source 1208
    target 1201
    value 0.142857
  ]
  edge
  [
    source 1208
    target 914
    value 0.142857
  ]
  edge
  [
    source 1208
    target 1207
    value 0.142857
  ]
  edge
  [
    source 1208
    target 915
    value 0.142857
  ]
  edge
  [
    source 1210
    target 1209
    value 0.333333
  ]
  edge
  [
    source 1211
    target 1209
    value 0.333333
  ]
  edge
  [
    source 1211
    target 1210
    value 0.333333
  ]
  edge
  [
    source 1212
    target 1209
    value 0.333333
  ]
  edge
  [
    source 1212
    target 1210
    value 0.333333
  ]
  edge
  [
    source 1212
    target 1211
    value 0.333333
  ]
  edge
  [
    source 1214
    target 330
    value 0.25
  ]
  edge
  [
    source 1215
    target 1214
    value 0.25
  ]
  edge
  [
    source 1215
    target 330
    value 0.25
  ]
  edge
  [
    source 1216
    target 1214
    value 0.25
  ]
  edge
  [
    source 1216
    target 330
    value 0.25
  ]
  edge
  [
    source 1216
    target 1215
    value 0.25
  ]
  edge
  [
    source 1217
    target 1214
    value 0.25
  ]
  edge
  [
    source 1217
    target 330
    value 0.25
  ]
  edge
  [
    source 1217
    target 1215
    value 0.25
  ]
  edge
  [
    source 1217
    target 1216
    value 0.25
  ]
  edge
  [
    source 1219
    target 1218
    value 1
  ]
  edge
  [
    source 1221
    target 500
    value 0.5
  ]
  edge
  [
    source 1221
    target 150
    value 0.5
  ]
  edge
  [
    source 1223
    target 1222
    value 0.5
  ]
  edge
  [
    source 1224
    target 1222
    value 0.5
  ]
  edge
  [
    source 1224
    target 1223
    value 0.5
  ]
  edge
  [
    source 1226
    target 1225
    value 1
  ]
  edge
  [
    source 1227
    target 1225
    value 1
  ]
  edge
  [
    source 1228
    target 132
    value 0.25
  ]
  edge
  [
    source 1228
    target 54
    value 0.25
  ]
  edge
  [
    source 1228
    target 33
    value 0.25
  ]
  edge
  [
    source 1229
    target 132
    value 0.25
  ]
  edge
  [
    source 1229
    target 1228
    value 0.25
  ]
  edge
  [
    source 1229
    target 54
    value 0.25
  ]
  edge
  [
    source 1229
    target 33
    value 0.25
  ]
  edge
  [
    source 1230
    target 244
    value 1
  ]
  edge
  [
    source 1232
    target 1231
    value 1
  ]
  edge
  [
    source 1233
    target 415
    value 0.5
  ]
  edge
  [
    source 1234
    target 1233
    value 0.5
  ]
  edge
  [
    source 1234
    target 415
    value 0.5
  ]
  edge
  [
    source 1235
    target 481
    value 0.5
  ]
  edge
  [
    source 1236
    target 1235
    value 0.5
  ]
  edge
  [
    source 1236
    target 481
    value 0.5
  ]
  edge
  [
    source 1238
    target 1237
    value 1
  ]
  edge
  [
    source 1239
    target 547
    value 1
  ]
  edge
  [
    source 1241
    target 1240
    value 1
  ]
  edge
  [
    source 1243
    target 1242
    value 1
  ]
  edge
  [
    source 1244
    target 482
    value 0.25
  ]
  edge
  [
    source 1245
    target 1244
    value 0.25
  ]
  edge
  [
    source 1245
    target 482
    value 0.25
  ]
  edge
  [
    source 1246
    target 1244
    value 0.25
  ]
  edge
  [
    source 1246
    target 1245
    value 0.25
  ]
  edge
  [
    source 1246
    target 482
    value 0.25
  ]
  edge
  [
    source 1247
    target 1244
    value 0.25
  ]
  edge
  [
    source 1247
    target 1245
    value 0.25
  ]
  edge
  [
    source 1247
    target 1246
    value 0.25
  ]
  edge
  [
    source 1247
    target 482
    value 0.25
  ]
  edge
  [
    source 1249
    target 1248
    value 1
  ]
  edge
  [
    source 1250
    target 481
    value 0.5
  ]
  edge
  [
    source 1251
    target 1250
    value 0.5
  ]
  edge
  [
    source 1251
    target 481
    value 0.5
  ]
  edge
  [
    source 1253
    target 1252
    value 0.5
  ]
  edge
  [
    source 1254
    target 1252
    value 1.5
  ]
  edge
  [
    source 1254
    target 1253
    value 0.5
  ]
  edge
  [
    source 1255
    target 764
    value 0.833333
  ]
  edge
  [
    source 1255
    target 765
    value 0.333333
  ]
  edge
  [
    source 1255
    target 121
    value 0.833333
  ]
  edge
  [
    source 1256
    target 1201
    value 0.333333
  ]
  edge
  [
    source 1256
    target 916
    value 0.333333
  ]
  edge
  [
    source 1257
    target 1201
    value 0.333333
  ]
  edge
  [
    source 1257
    target 1256
    value 0.333333
  ]
  edge
  [
    source 1257
    target 916
    value 0.333333
  ]
  edge
  [
    source 1259
    target 1258
    value 1
  ]
  edge
  [
    source 1261
    target 1260
    value 0.5
  ]
  edge
  [
    source 1262
    target 1260
    value 0.5
  ]
  edge
  [
    source 1262
    target 1261
    value 0.5
  ]
  edge
  [
    source 1263
    target 375
    value 0.333333
  ]
  edge
  [
    source 1263
    target 376
    value 0.333333
  ]
  edge
  [
    source 1263
    target 377
    value 0.333333
  ]
  edge
  [
    source 1265
    target 1264
    value 0.333333
  ]
  edge
  [
    source 1266
    target 1264
    value 0.333333
  ]
  edge
  [
    source 1266
    target 1265
    value 0.333333
  ]
  edge
  [
    source 1267
    target 1264
    value 0.333333
  ]
  edge
  [
    source 1267
    target 1265
    value 0.333333
  ]
  edge
  [
    source 1267
    target 1266
    value 0.333333
  ]
  edge
  [
    source 1268
    target 872
    value 1
  ]
  edge
  [
    source 1270
    target 320
    value 0.5
  ]
  edge
  [
    source 1270
    target 321
    value 0.5
  ]
  edge
  [
    source 1271
    target 947
    value 0.5
  ]
  edge
  [
    source 1272
    target 1271
    value 0.5
  ]
  edge
  [
    source 1272
    target 947
    value 0.5
  ]
  edge
  [
    source 1273
    target 843
    value 0.75
  ]
  edge
  [
    source 1274
    target 1273
    value 0.75
  ]
  edge
  [
    source 1274
    target 843
    value 0.75
  ]
  edge
  [
    source 1275
    target 1273
    value 0.25
  ]
  edge
  [
    source 1275
    target 1274
    value 0.25
  ]
  edge
  [
    source 1275
    target 843
    value 0.25
  ]
  edge
  [
    source 1276
    target 1273
    value 0.25
  ]
  edge
  [
    source 1276
    target 1274
    value 0.25
  ]
  edge
  [
    source 1276
    target 843
    value 0.25
  ]
  edge
  [
    source 1276
    target 1275
    value 0.25
  ]
  edge
  [
    source 1278
    target 744
    value 0.7
  ]
  edge
  [
    source 1278
    target 294
    value 0.7
  ]
  edge
  [
    source 1278
    target 743
    value 0.2
  ]
  edge
  [
    source 1278
    target 742
    value 0.2
  ]
  edge
  [
    source 1278
    target 293
    value 0.2
  ]
  edge
  [
    source 1279
    target 744
    value 0.333333
  ]
  edge
  [
    source 1280
    target 744
    value 0.333333
  ]
  edge
  [
    source 1280
    target 1279
    value 0.333333
  ]
  edge
  [
    source 1281
    target 744
    value 0.333333
  ]
  edge
  [
    source 1281
    target 1279
    value 0.333333
  ]
  edge
  [
    source 1281
    target 1280
    value 0.333333
  ]
  edge
  [
    source 1282
    target 1145
    value 0.333333
  ]
  edge
  [
    source 1282
    target 219
    value 0.333333
  ]
  edge
  [
    source 1283
    target 1282
    value 0.333333
  ]
  edge
  [
    source 1283
    target 1145
    value 0.333333
  ]
  edge
  [
    source 1283
    target 219
    value 0.333333
  ]
  edge
  [
    source 1287
    target 1286
    value 0.25
  ]
  edge
  [
    source 1288
    target 1286
    value 0.25
  ]
  edge
  [
    source 1288
    target 1287
    value 0.25
  ]
  edge
  [
    source 1289
    target 1286
    value 0.25
  ]
  edge
  [
    source 1289
    target 1287
    value 0.25
  ]
  edge
  [
    source 1289
    target 1288
    value 0.25
  ]
  edge
  [
    source 1290
    target 1286
    value 0.25
  ]
  edge
  [
    source 1290
    target 1287
    value 0.25
  ]
  edge
  [
    source 1290
    target 1288
    value 0.25
  ]
  edge
  [
    source 1290
    target 1289
    value 0.25
  ]
  edge
  [
    source 1293
    target 1292
    value 0.5
  ]
  edge
  [
    source 1294
    target 1292
    value 0.5
  ]
  edge
  [
    source 1294
    target 1293
    value 0.5
  ]
  edge
  [
    source 1295
    target 375
    value 0.25
  ]
  edge
  [
    source 1295
    target 376
    value 0.25
  ]
  edge
  [
    source 1295
    target 33
    value 0.25
  ]
  edge
  [
    source 1295
    target 377
    value 0.25
  ]
  edge
  [
    source 1299
    target 1298
    value 1
  ]
  edge
  [
    source 1303
    target 1018
    value 0.5
  ]
  edge
  [
    source 1304
    target 1018
    value 0.5
  ]
  edge
  [
    source 1304
    target 1303
    value 0.5
  ]
  edge
  [
    source 1305
    target 1018
    value 1
  ]
  edge
  [
    source 1306
    target 1018
    value 0.2
  ]
  edge
  [
    source 1306
    target 1017
    value 0.2
  ]
  edge
  [
    source 1307
    target 1018
    value 0.2
  ]
  edge
  [
    source 1307
    target 1306
    value 0.2
  ]
  edge
  [
    source 1307
    target 1017
    value 0.2
  ]
  edge
  [
    source 1308
    target 1018
    value 0.2
  ]
  edge
  [
    source 1308
    target 1306
    value 0.2
  ]
  edge
  [
    source 1308
    target 1307
    value 0.2
  ]
  edge
  [
    source 1308
    target 1017
    value 0.2
  ]
  edge
  [
    source 1309
    target 1018
    value 0.2
  ]
  edge
  [
    source 1309
    target 1306
    value 0.2
  ]
  edge
  [
    source 1309
    target 1307
    value 0.2
  ]
  edge
  [
    source 1309
    target 1308
    value 0.2
  ]
  edge
  [
    source 1309
    target 1017
    value 0.2
  ]
  edge
  [
    source 1311
    target 1310
    value 1
  ]
  edge
  [
    source 1313
    target 1312
    value 0.25
  ]
  edge
  [
    source 1314
    target 1312
    value 0.25
  ]
  edge
  [
    source 1314
    target 1313
    value 0.25
  ]
  edge
  [
    source 1315
    target 1312
    value 0.25
  ]
  edge
  [
    source 1315
    target 1313
    value 0.25
  ]
  edge
  [
    source 1315
    target 1314
    value 0.25
  ]
  edge
  [
    source 1315
    target 53
    value 0.25
  ]
  edge
  [
    source 1316
    target 1312
    value 0.25
  ]
  edge
  [
    source 1316
    target 1313
    value 0.25
  ]
  edge
  [
    source 1316
    target 1314
    value 0.25
  ]
  edge
  [
    source 1316
    target 1315
    value 0.25
  ]
  edge
  [
    source 1318
    target 900
    value 1
  ]
  edge
  [
    source 1321
    target 1320
    value 1
  ]
  edge
  [
    source 1322
    target 524
    value 1
  ]
  edge
  [
    source 1324
    target 1323
    value 0.5
  ]
  edge
  [
    source 1325
    target 1323
    value 0.5
  ]
  edge
  [
    source 1325
    target 1324
    value 0.5
  ]
  edge
  [
    source 1327
    target 1326
    value 1
  ]
  edge
  [
    source 1329
    target 1328
    value 1
  ]
  edge
  [
    source 1332
    target 1331
    value 0.5
  ]
  edge
  [
    source 1333
    target 1331
    value 0.5
  ]
  edge
  [
    source 1333
    target 1332
    value 0.5
  ]
  edge
  [
    source 1336
    target 1335
    value 0.333333
  ]
  edge
  [
    source 1337
    target 1335
    value 0.333333
  ]
  edge
  [
    source 1337
    target 1336
    value 0.333333
  ]
  edge
  [
    source 1338
    target 1335
    value 0.333333
  ]
  edge
  [
    source 1338
    target 1336
    value 0.333333
  ]
  edge
  [
    source 1338
    target 1337
    value 0.333333
  ]
  edge
  [
    source 1339
    target 882
    value 1
  ]
  edge
  [
    source 1341
    target 517
    value 1
  ]
  edge
  [
    source 1342
    target 281
    value 0.333333
  ]
  edge
  [
    source 1342
    target 150
    value 0.333333
  ]
  edge
  [
    source 1342
    target 1178
    value 0.333333
  ]
  edge
  [
    source 1343
    target 281
    value 0.5
  ]
  edge
  [
    source 1344
    target 281
    value 0.5
  ]
  edge
  [
    source 1344
    target 1343
    value 0.5
  ]
  edge
  [
    source 1345
    target 1225
    value 1
  ]
  edge
  [
    source 1346
    target 721
    value 1
  ]
  edge
  [
    source 1347
    target 377
    value 0.5
  ]
  edge
  [
    source 1348
    target 1347
    value 0.5
  ]
  edge
  [
    source 1348
    target 377
    value 0.5
  ]
  edge
  [
    source 1349
    target 362
    value 0.25
  ]
  edge
  [
    source 1350
    target 1349
    value 0.25
  ]
  edge
  [
    source 1350
    target 362
    value 0.25
  ]
  edge
  [
    source 1351
    target 1349
    value 0.25
  ]
  edge
  [
    source 1351
    target 1350
    value 0.25
  ]
  edge
  [
    source 1351
    target 362
    value 0.25
  ]
  edge
  [
    source 1352
    target 1349
    value 0.25
  ]
  edge
  [
    source 1352
    target 1350
    value 0.25
  ]
  edge
  [
    source 1352
    target 1351
    value 0.25
  ]
  edge
  [
    source 1352
    target 362
    value 0.25
  ]
  edge
  [
    source 1355
    target 1354
    value 1
  ]
  edge
  [
    source 1356
    target 523
    value 0.333333
  ]
  edge
  [
    source 1356
    target 746
    value 0.333333
  ]
  edge
  [
    source 1356
    target 742
    value 0.333333
  ]
  edge
  [
    source 1356
    target 931
    value 1
  ]
  edge
  [
    source 1357
    target 1356
    value 1
  ]
  edge
  [
    source 1357
    target 1107
    value 0.333333
  ]
  edge
  [
    source 1358
    target 1356
    value 1
  ]
  edge
  [
    source 1358
    target 1357
    value 2.33333
  ]
  edge
  [
    source 1358
    target 1107
    value 0.333333
  ]
  edge
  [
    source 1359
    target 1356
    value 1
  ]
  edge
  [
    source 1361
    target 46
    value 1.33333
  ]
  edge
  [
    source 1361
    target 428
    value 0.333333
  ]
  edge
  [
    source 1362
    target 46
    value 0.333333
  ]
  edge
  [
    source 1362
    target 1361
    value 0.333333
  ]
  edge
  [
    source 1362
    target 428
    value 0.333333
  ]
  edge
  [
    source 1363
    target 46
    value 1
  ]
  edge
  [
    source 1364
    target 1286
    value 0.25
  ]
  edge
  [
    source 1365
    target 1364
    value 0.25
  ]
  edge
  [
    source 1365
    target 1286
    value 0.25
  ]
  edge
  [
    source 1366
    target 1364
    value 0.25
  ]
  edge
  [
    source 1366
    target 1365
    value 0.25
  ]
  edge
  [
    source 1366
    target 1286
    value 0.25
  ]
  edge
  [
    source 1367
    target 1364
    value 0.25
  ]
  edge
  [
    source 1367
    target 1365
    value 0.25
  ]
  edge
  [
    source 1367
    target 1366
    value 0.25
  ]
  edge
  [
    source 1367
    target 1286
    value 0.25
  ]
  edge
  [
    source 1368
    target 932
    value 0.2
  ]
  edge
  [
    source 1368
    target 293
    value 0.2
  ]
  edge
  [
    source 1368
    target 294
    value 0.2
  ]
  edge
  [
    source 1368
    target 931
    value 0.2
  ]
  edge
  [
    source 1369
    target 932
    value 0.2
  ]
  edge
  [
    source 1369
    target 1368
    value 0.2
  ]
  edge
  [
    source 1369
    target 293
    value 0.2
  ]
  edge
  [
    source 1369
    target 294
    value 0.2
  ]
  edge
  [
    source 1369
    target 931
    value 0.2
  ]
  edge
  [
    source 1371
    target 1370
    value 1
  ]
  edge
  [
    source 1373
    target 1372
    value 1
  ]
  edge
  [
    source 1375
    target 1374
    value 0.5
  ]
  edge
  [
    source 1376
    target 1374
    value 0.5
  ]
  edge
  [
    source 1376
    target 1375
    value 0.5
  ]
  edge
  [
    source 1377
    target 1294
    value 0.5
  ]
  edge
  [
    source 1378
    target 1377
    value 0.5
  ]
  edge
  [
    source 1378
    target 1294
    value 0.5
  ]
  edge
  [
    source 1381
    target 522
    value 0.5
  ]
  edge
  [
    source 1381
    target 76
    value 0.5
  ]
  edge
  [
    source 1384
    target 194
    value 0.5
  ]
  edge
  [
    source 1385
    target 1384
    value 0.5
  ]
  edge
  [
    source 1385
    target 194
    value 0.5
  ]
  edge
  [
    source 1387
    target 1386
    value 1
  ]
  edge
  [
    source 1389
    target 329
    value 1.5
  ]
  edge
  [
    source 1389
    target 547
    value 0.5
  ]
  edge
  [
    source 1391
    target 1390
    value 0.5
  ]
  edge
  [
    source 1392
    target 1390
    value 0.5
  ]
  edge
  [
    source 1392
    target 1391
    value 0.5
  ]
  edge
  [
    source 1394
    target 1145
    value 0.142857
  ]
  edge
  [
    source 1394
    target 219
    value 0.142857
  ]
  edge
  [
    source 1394
    target 343
    value 0.142857
  ]
  edge
  [
    source 1394
    target 697
    value 0.142857
  ]
  edge
  [
    source 1395
    target 1394
    value 0.142857
  ]
  edge
  [
    source 1395
    target 1145
    value 0.142857
  ]
  edge
  [
    source 1395
    target 219
    value 0.142857
  ]
  edge
  [
    source 1395
    target 343
    value 0.142857
  ]
  edge
  [
    source 1395
    target 697
    value 0.142857
  ]
  edge
  [
    source 1396
    target 1394
    value 0.142857
  ]
  edge
  [
    source 1396
    target 1145
    value 0.142857
  ]
  edge
  [
    source 1396
    target 1395
    value 0.142857
  ]
  edge
  [
    source 1396
    target 219
    value 0.142857
  ]
  edge
  [
    source 1396
    target 343
    value 0.142857
  ]
  edge
  [
    source 1396
    target 697
    value 0.142857
  ]
  edge
  [
    source 1397
    target 1394
    value 0.142857
  ]
  edge
  [
    source 1397
    target 1145
    value 0.142857
  ]
  edge
  [
    source 1397
    target 1395
    value 0.142857
  ]
  edge
  [
    source 1397
    target 219
    value 0.142857
  ]
  edge
  [
    source 1397
    target 343
    value 0.142857
  ]
  edge
  [
    source 1397
    target 1396
    value 0.142857
  ]
  edge
  [
    source 1397
    target 697
    value 0.142857
  ]
  edge
  [
    source 1398
    target 314
    value 1
  ]
  edge
  [
    source 1400
    target 1399
    value 0.25
  ]
  edge
  [
    source 1401
    target 1399
    value 0.25
  ]
  edge
  [
    source 1401
    target 1400
    value 0.25
  ]
  edge
  [
    source 1402
    target 1399
    value 0.25
  ]
  edge
  [
    source 1402
    target 1400
    value 0.25
  ]
  edge
  [
    source 1402
    target 1401
    value 0.25
  ]
  edge
  [
    source 1403
    target 1399
    value 0.25
  ]
  edge
  [
    source 1403
    target 1400
    value 0.25
  ]
  edge
  [
    source 1403
    target 1401
    value 0.25
  ]
  edge
  [
    source 1403
    target 1402
    value 0.25
  ]
  edge
  [
    source 1404
    target 327
    value 0.166667
  ]
  edge
  [
    source 1404
    target 416
    value 0.166667
  ]
  edge
  [
    source 1405
    target 1404
    value 0.166667
  ]
  edge
  [
    source 1405
    target 327
    value 0.166667
  ]
  edge
  [
    source 1405
    target 416
    value 0.166667
  ]
  edge
  [
    source 1406
    target 1404
    value 0.166667
  ]
  edge
  [
    source 1406
    target 1405
    value 0.166667
  ]
  edge
  [
    source 1406
    target 327
    value 0.166667
  ]
  edge
  [
    source 1406
    target 416
    value 0.166667
  ]
  edge
  [
    source 1407
    target 1404
    value 0.166667
  ]
  edge
  [
    source 1407
    target 1405
    value 0.166667
  ]
  edge
  [
    source 1407
    target 327
    value 0.166667
  ]
  edge
  [
    source 1407
    target 1406
    value 0.166667
  ]
  edge
  [
    source 1407
    target 416
    value 0.166667
  ]
  edge
  [
    source 1408
    target 1404
    value 0.166667
  ]
  edge
  [
    source 1408
    target 1405
    value 0.166667
  ]
  edge
  [
    source 1408
    target 327
    value 0.166667
  ]
  edge
  [
    source 1408
    target 1406
    value 0.166667
  ]
  edge
  [
    source 1408
    target 416
    value 0.166667
  ]
  edge
  [
    source 1408
    target 1407
    value 0.166667
  ]
  edge
  [
    source 1409
    target 496
    value 0.5
  ]
  edge
  [
    source 1410
    target 1409
    value 0.5
  ]
  edge
  [
    source 1410
    target 496
    value 0.5
  ]
  edge
  [
    source 1411
    target 1357
    value 0.333333
  ]
  edge
  [
    source 1411
    target 1107
    value 0.333333
  ]
  edge
  [
    source 1411
    target 1358
    value 0.333333
  ]
  edge
  [
    source 1412
    target 1060
    value 1
  ]
  edge
  [
    source 1413
    target 186
    value 0.25
  ]
  edge
  [
    source 1413
    target 1162
    value 0.25
  ]
  edge
  [
    source 1414
    target 186
    value 0.25
  ]
  edge
  [
    source 1414
    target 1413
    value 0.25
  ]
  edge
  [
    source 1414
    target 1162
    value 0.25
  ]
  edge
  [
    source 1415
    target 186
    value 0.25
  ]
  edge
  [
    source 1415
    target 1413
    value 0.25
  ]
  edge
  [
    source 1415
    target 1162
    value 0.25
  ]
  edge
  [
    source 1415
    target 1414
    value 0.25
  ]
  edge
  [
    source 1416
    target 303
    value 0.333333
  ]
  edge
  [
    source 1416
    target 1026
    value 0.333333
  ]
  edge
  [
    source 1417
    target 1416
    value 0.333333
  ]
  edge
  [
    source 1417
    target 303
    value 0.333333
  ]
  edge
  [
    source 1417
    target 1026
    value 0.333333
  ]
  edge
  [
    source 1418
    target 930
    value 1
  ]
  edge
  [
    source 1419
    target 1336
    value 1
  ]
  edge
  [
    source 1421
    target 1420
    value 0.333333
  ]
  edge
  [
    source 1422
    target 1420
    value 0.333333
  ]
  edge
  [
    source 1422
    target 1421
    value 0.333333
  ]
  edge
  [
    source 1423
    target 1420
    value 0.333333
  ]
  edge
  [
    source 1423
    target 1421
    value 0.333333
  ]
  edge
  [
    source 1423
    target 1422
    value 0.333333
  ]
  edge
  [
    source 1424
    target 9
    value 0.5
  ]
  edge
  [
    source 1425
    target 1424
    value 0.5
  ]
  edge
  [
    source 1425
    target 9
    value 1.5
  ]
  edge
  [
    source 1427
    target 1426
    value 0.5
  ]
  edge
  [
    source 1428
    target 1426
    value 0.5
  ]
  edge
  [
    source 1428
    target 1427
    value 0.5
  ]
  edge
  [
    source 1429
    target 645
    value 0.0526316
  ]
  edge
  [
    source 1430
    target 1429
    value 0.385965
  ]
  edge
  [
    source 1430
    target 645
    value 0.0526316
  ]
  edge
  [
    source 1431
    target 1429
    value 0.385965
  ]
  edge
  [
    source 1431
    target 645
    value 0.0526316
  ]
  edge
  [
    source 1431
    target 1430
    value 0.385965
  ]
  edge
  [
    source 1432
    target 1429
    value 0.0526316
  ]
  edge
  [
    source 1432
    target 645
    value 0.0526316
  ]
  edge
  [
    source 1432
    target 1430
    value 0.0526316
  ]
  edge
  [
    source 1432
    target 1431
    value 0.0526316
  ]
  edge
  [
    source 1433
    target 1429
    value 0.0526316
  ]
  edge
  [
    source 1433
    target 645
    value 0.0526316
  ]
  edge
  [
    source 1433
    target 1430
    value 0.0526316
  ]
  edge
  [
    source 1433
    target 1431
    value 0.0526316
  ]
  edge
  [
    source 1433
    target 1432
    value 0.0526316
  ]
  edge
  [
    source 1434
    target 1429
    value 0.0526316
  ]
  edge
  [
    source 1434
    target 645
    value 0.0526316
  ]
  edge
  [
    source 1434
    target 1430
    value 0.0526316
  ]
  edge
  [
    source 1434
    target 1431
    value 0.0526316
  ]
  edge
  [
    source 1434
    target 1432
    value 0.0526316
  ]
  edge
  [
    source 1434
    target 1433
    value 0.0526316
  ]
  edge
  [
    source 1435
    target 1429
    value 0.0526316
  ]
  edge
  [
    source 1435
    target 645
    value 0.0526316
  ]
  edge
  [
    source 1435
    target 1430
    value 0.0526316
  ]
  edge
  [
    source 1435
    target 1431
    value 0.0526316
  ]
  edge
  [
    source 1435
    target 1432
    value 0.0526316
  ]
  edge
  [
    source 1435
    target 1433
    value 0.0526316
  ]
  edge
  [
    source 1435
    target 1434
    value 0.0526316
  ]
  edge
  [
    source 1436
    target 1429
    value 0.0526316
  ]
  edge
  [
    source 1436
    target 645
    value 0.0526316
  ]
  edge
  [
    source 1436
    target 1430
    value 0.0526316
  ]
  edge
  [
    source 1436
    target 1431
    value 0.0526316
  ]
  edge
  [
    source 1436
    target 1432
    value 0.0526316
  ]
  edge
  [
    source 1436
    target 1433
    value 0.0526316
  ]
  edge
  [
    source 1436
    target 1434
    value 0.0526316
  ]
  edge
  [
    source 1436
    target 1435
    value 0.0526316
  ]
  edge
  [
    source 1437
    target 1429
    value 0.0526316
  ]
  edge
  [
    source 1437
    target 645
    value 0.0526316
  ]
  edge
  [
    source 1437
    target 1430
    value 0.0526316
  ]
  edge
  [
    source 1437
    target 1431
    value 0.0526316
  ]
  edge
  [
    source 1437
    target 1432
    value 0.0526316
  ]
  edge
  [
    source 1437
    target 1433
    value 0.0526316
  ]
  edge
  [
    source 1437
    target 1434
    value 0.0526316
  ]
  edge
  [
    source 1437
    target 1435
    value 0.0526316
  ]
  edge
  [
    source 1437
    target 1436
    value 0.0526316
  ]
  edge
  [
    source 1438
    target 1429
    value 0.0526316
  ]
  edge
  [
    source 1438
    target 645
    value 0.0526316
  ]
  edge
  [
    source 1438
    target 1430
    value 0.0526316
  ]
  edge
  [
    source 1438
    target 1431
    value 0.0526316
  ]
  edge
  [
    source 1438
    target 1432
    value 0.0526316
  ]
  edge
  [
    source 1438
    target 1433
    value 0.0526316
  ]
  edge
  [
    source 1438
    target 1434
    value 0.0526316
  ]
  edge
  [
    source 1438
    target 1435
    value 0.0526316
  ]
  edge
  [
    source 1438
    target 1436
    value 0.0526316
  ]
  edge
  [
    source 1438
    target 1437
    value 0.0526316
  ]
  edge
  [
    source 1439
    target 1429
    value 0.0526316
  ]
  edge
  [
    source 1439
    target 645
    value 0.0526316
  ]
  edge
  [
    source 1439
    target 1430
    value 0.0526316
  ]
  edge
  [
    source 1439
    target 1431
    value 0.0526316
  ]
  edge
  [
    source 1439
    target 1432
    value 0.0526316
  ]
  edge
  [
    source 1439
    target 1433
    value 0.0526316
  ]
  edge
  [
    source 1439
    target 1434
    value 0.0526316
  ]
  edge
  [
    source 1439
    target 1435
    value 0.0526316
  ]
  edge
  [
    source 1439
    target 1436
    value 0.0526316
  ]
  edge
  [
    source 1439
    target 1437
    value 0.0526316
  ]
  edge
  [
    source 1439
    target 1438
    value 0.0526316
  ]
  edge
  [
    source 1440
    target 1429
    value 0.0526316
  ]
  edge
  [
    source 1440
    target 645
    value 0.0526316
  ]
  edge
  [
    source 1440
    target 1430
    value 0.0526316
  ]
  edge
  [
    source 1440
    target 1431
    value 0.0526316
  ]
  edge
  [
    source 1440
    target 1432
    value 0.0526316
  ]
  edge
  [
    source 1440
    target 1433
    value 0.0526316
  ]
  edge
  [
    source 1440
    target 1434
    value 0.0526316
  ]
  edge
  [
    source 1440
    target 1435
    value 0.0526316
  ]
  edge
  [
    source 1440
    target 1436
    value 0.0526316
  ]
  edge
  [
    source 1440
    target 1437
    value 0.0526316
  ]
  edge
  [
    source 1440
    target 1438
    value 0.0526316
  ]
  edge
  [
    source 1440
    target 1439
    value 0.0526316
  ]
  edge
  [
    source 1441
    target 1429
    value 0.0526316
  ]
  edge
  [
    source 1441
    target 645
    value 0.0526316
  ]
  edge
  [
    source 1441
    target 1430
    value 0.0526316
  ]
  edge
  [
    source 1441
    target 1431
    value 0.0526316
  ]
  edge
  [
    source 1441
    target 1432
    value 0.0526316
  ]
  edge
  [
    source 1441
    target 1433
    value 0.0526316
  ]
  edge
  [
    source 1441
    target 1434
    value 0.0526316
  ]
  edge
  [
    source 1441
    target 1435
    value 0.0526316
  ]
  edge
  [
    source 1441
    target 1436
    value 0.0526316
  ]
  edge
  [
    source 1441
    target 1437
    value 0.0526316
  ]
  edge
  [
    source 1441
    target 1438
    value 0.0526316
  ]
  edge
  [
    source 1441
    target 1439
    value 0.0526316
  ]
  edge
  [
    source 1441
    target 1440
    value 0.0526316
  ]
  edge
  [
    source 1442
    target 1429
    value 0.0526316
  ]
  edge
  [
    source 1442
    target 645
    value 0.0526316
  ]
  edge
  [
    source 1442
    target 1430
    value 0.0526316
  ]
  edge
  [
    source 1442
    target 1431
    value 0.0526316
  ]
  edge
  [
    source 1442
    target 1432
    value 0.0526316
  ]
  edge
  [
    source 1442
    target 1433
    value 0.0526316
  ]
  edge
  [
    source 1442
    target 1434
    value 0.0526316
  ]
  edge
  [
    source 1442
    target 1435
    value 0.0526316
  ]
  edge
  [
    source 1442
    target 1436
    value 0.0526316
  ]
  edge
  [
    source 1442
    target 1437
    value 0.0526316
  ]
  edge
  [
    source 1442
    target 1438
    value 0.0526316
  ]
  edge
  [
    source 1442
    target 1439
    value 0.0526316
  ]
  edge
  [
    source 1442
    target 1440
    value 0.0526316
  ]
  edge
  [
    source 1442
    target 1441
    value 0.0526316
  ]
  edge
  [
    source 1443
    target 1429
    value 0.0526316
  ]
  edge
  [
    source 1443
    target 645
    value 0.0526316
  ]
  edge
  [
    source 1443
    target 1430
    value 0.0526316
  ]
  edge
  [
    source 1443
    target 1431
    value 0.0526316
  ]
  edge
  [
    source 1443
    target 1432
    value 0.0526316
  ]
  edge
  [
    source 1443
    target 1433
    value 0.0526316
  ]
  edge
  [
    source 1443
    target 1434
    value 0.0526316
  ]
  edge
  [
    source 1443
    target 1435
    value 0.0526316
  ]
  edge
  [
    source 1443
    target 1436
    value 0.0526316
  ]
  edge
  [
    source 1443
    target 1437
    value 0.0526316
  ]
  edge
  [
    source 1443
    target 1438
    value 0.0526316
  ]
  edge
  [
    source 1443
    target 1439
    value 0.0526316
  ]
  edge
  [
    source 1443
    target 1440
    value 0.0526316
  ]
  edge
  [
    source 1443
    target 1441
    value 0.0526316
  ]
  edge
  [
    source 1443
    target 1442
    value 0.0526316
  ]
  edge
  [
    source 1444
    target 1429
    value 0.0526316
  ]
  edge
  [
    source 1444
    target 645
    value 0.0526316
  ]
  edge
  [
    source 1444
    target 1430
    value 0.0526316
  ]
  edge
  [
    source 1444
    target 1431
    value 0.0526316
  ]
  edge
  [
    source 1444
    target 1432
    value 0.0526316
  ]
  edge
  [
    source 1444
    target 1433
    value 0.0526316
  ]
  edge
  [
    source 1444
    target 1434
    value 0.0526316
  ]
  edge
  [
    source 1444
    target 1435
    value 0.0526316
  ]
  edge
  [
    source 1444
    target 1436
    value 0.0526316
  ]
  edge
  [
    source 1444
    target 1437
    value 0.0526316
  ]
  edge
  [
    source 1444
    target 1438
    value 0.0526316
  ]
  edge
  [
    source 1444
    target 1439
    value 0.0526316
  ]
  edge
  [
    source 1444
    target 1440
    value 0.0526316
  ]
  edge
  [
    source 1444
    target 1441
    value 0.0526316
  ]
  edge
  [
    source 1444
    target 1442
    value 0.0526316
  ]
  edge
  [
    source 1444
    target 1443
    value 0.0526316
  ]
  edge
  [
    source 1445
    target 1429
    value 0.0526316
  ]
  edge
  [
    source 1445
    target 645
    value 0.0526316
  ]
  edge
  [
    source 1445
    target 1430
    value 0.0526316
  ]
  edge
  [
    source 1445
    target 1431
    value 0.0526316
  ]
  edge
  [
    source 1445
    target 1432
    value 0.0526316
  ]
  edge
  [
    source 1445
    target 1433
    value 0.0526316
  ]
  edge
  [
    source 1445
    target 1434
    value 0.0526316
  ]
  edge
  [
    source 1445
    target 1435
    value 0.0526316
  ]
  edge
  [
    source 1445
    target 1436
    value 0.0526316
  ]
  edge
  [
    source 1445
    target 1437
    value 0.0526316
  ]
  edge
  [
    source 1445
    target 1438
    value 0.0526316
  ]
  edge
  [
    source 1445
    target 1439
    value 0.0526316
  ]
  edge
  [
    source 1445
    target 1440
    value 0.0526316
  ]
  edge
  [
    source 1445
    target 1441
    value 0.0526316
  ]
  edge
  [
    source 1445
    target 1442
    value 0.0526316
  ]
  edge
  [
    source 1445
    target 1443
    value 0.0526316
  ]
  edge
  [
    source 1445
    target 1444
    value 0.0526316
  ]
  edge
  [
    source 1446
    target 1429
    value 0.0526316
  ]
  edge
  [
    source 1446
    target 645
    value 0.0526316
  ]
  edge
  [
    source 1446
    target 1430
    value 0.0526316
  ]
  edge
  [
    source 1446
    target 1431
    value 0.0526316
  ]
  edge
  [
    source 1446
    target 1432
    value 0.0526316
  ]
  edge
  [
    source 1446
    target 1433
    value 0.0526316
  ]
  edge
  [
    source 1446
    target 1434
    value 0.0526316
  ]
  edge
  [
    source 1446
    target 1435
    value 0.0526316
  ]
  edge
  [
    source 1446
    target 1436
    value 0.0526316
  ]
  edge
  [
    source 1446
    target 1437
    value 0.0526316
  ]
  edge
  [
    source 1446
    target 1438
    value 0.0526316
  ]
  edge
  [
    source 1446
    target 1439
    value 0.0526316
  ]
  edge
  [
    source 1446
    target 1440
    value 0.0526316
  ]
  edge
  [
    source 1446
    target 1441
    value 0.0526316
  ]
  edge
  [
    source 1446
    target 1442
    value 0.0526316
  ]
  edge
  [
    source 1446
    target 1443
    value 0.0526316
  ]
  edge
  [
    source 1446
    target 1444
    value 0.0526316
  ]
  edge
  [
    source 1446
    target 1445
    value 0.0526316
  ]
  edge
  [
    source 1447
    target 1429
    value 0.0526316
  ]
  edge
  [
    source 1447
    target 645
    value 0.0526316
  ]
  edge
  [
    source 1447
    target 1430
    value 0.0526316
  ]
  edge
  [
    source 1447
    target 1431
    value 0.0526316
  ]
  edge
  [
    source 1447
    target 1432
    value 0.0526316
  ]
  edge
  [
    source 1447
    target 1433
    value 0.0526316
  ]
  edge
  [
    source 1447
    target 1434
    value 0.0526316
  ]
  edge
  [
    source 1447
    target 1435
    value 0.0526316
  ]
  edge
  [
    source 1447
    target 1436
    value 0.0526316
  ]
  edge
  [
    source 1447
    target 1437
    value 0.0526316
  ]
  edge
  [
    source 1447
    target 1438
    value 0.0526316
  ]
  edge
  [
    source 1447
    target 1439
    value 0.0526316
  ]
  edge
  [
    source 1447
    target 1440
    value 0.0526316
  ]
  edge
  [
    source 1447
    target 1441
    value 0.0526316
  ]
  edge
  [
    source 1447
    target 1442
    value 0.0526316
  ]
  edge
  [
    source 1447
    target 1443
    value 0.0526316
  ]
  edge
  [
    source 1447
    target 1444
    value 0.0526316
  ]
  edge
  [
    source 1447
    target 1445
    value 0.0526316
  ]
  edge
  [
    source 1447
    target 1446
    value 0.0526316
  ]
  edge
  [
    source 1448
    target 1429
    value 0.333333
  ]
  edge
  [
    source 1448
    target 1430
    value 0.333333
  ]
  edge
  [
    source 1448
    target 1431
    value 0.333333
  ]
  edge
  [
    source 1450
    target 1449
    value 1
  ]
  edge
  [
    source 1451
    target 283
    value 0.5
  ]
  edge
  [
    source 1451
    target 281
    value 0.5
  ]
  edge
  [
    source 1452
    target 216
    value 1
  ]
  edge
  [
    source 1453
    target 1360
    value 1
  ]
  edge
  [
    source 1454
    target 721
    value 1
  ]
  edge
  [
    source 1455
    target 482
    value 1
  ]
  edge
  [
    source 1457
    target 1456
    value 0.333333
  ]
  edge
  [
    source 1458
    target 1456
    value 0.333333
  ]
  edge
  [
    source 1458
    target 1457
    value 0.333333
  ]
  edge
  [
    source 1459
    target 1456
    value 0.333333
  ]
  edge
  [
    source 1459
    target 1457
    value 0.333333
  ]
  edge
  [
    source 1459
    target 1458
    value 0.333333
  ]
  edge
  [
    source 1460
    target 517
    value 0.333333
  ]
  edge
  [
    source 1460
    target 127
    value 0.333333
  ]
  edge
  [
    source 1460
    target 151
    value 0.333333
  ]
  edge
  [
    source 1461
    target 55
    value 0.5
  ]
  edge
  [
    source 1461
    target 56
    value 0.5
  ]
  edge
  [
    source 1464
    target 860
    value 0.2
  ]
  edge
  [
    source 1464
    target 294
    value 0.2
  ]
  edge
  [
    source 1465
    target 1464
    value 0.2
  ]
  edge
  [
    source 1465
    target 860
    value 0.2
  ]
  edge
  [
    source 1465
    target 294
    value 0.2
  ]
  edge
  [
    source 1466
    target 1464
    value 0.2
  ]
  edge
  [
    source 1466
    target 1465
    value 0.2
  ]
  edge
  [
    source 1466
    target 860
    value 0.2
  ]
  edge
  [
    source 1466
    target 294
    value 0.2
  ]
  edge
  [
    source 1467
    target 1464
    value 0.2
  ]
  edge
  [
    source 1467
    target 1465
    value 0.2
  ]
  edge
  [
    source 1467
    target 860
    value 0.2
  ]
  edge
  [
    source 1467
    target 1466
    value 0.2
  ]
  edge
  [
    source 1467
    target 294
    value 0.2
  ]
  edge
  [
    source 1468
    target 53
    value 0.25
  ]
  edge
  [
    source 1468
    target 1315
    value 0.25
  ]
  edge
  [
    source 1469
    target 53
    value 0.25
  ]
  edge
  [
    source 1469
    target 1468
    value 0.25
  ]
  edge
  [
    source 1469
    target 1315
    value 0.25
  ]
  edge
  [
    source 1470
    target 53
    value 0.25
  ]
  edge
  [
    source 1470
    target 1468
    value 0.25
  ]
  edge
  [
    source 1470
    target 1315
    value 0.25
  ]
  edge
  [
    source 1470
    target 1469
    value 0.25
  ]
  edge
  [
    source 1472
    target 1471
    value 0.5
  ]
  edge
  [
    source 1473
    target 1471
    value 0.5
  ]
  edge
  [
    source 1473
    target 1472
    value 0.5
  ]
  edge
  [
    source 1475
    target 1474
    value 0.5
  ]
  edge
  [
    source 1476
    target 1474
    value 0.5
  ]
  edge
  [
    source 1476
    target 1475
    value 0.5
  ]
  edge
  [
    source 1477
    target 207
    value 0.5
  ]
  edge
  [
    source 1478
    target 1477
    value 0.5
  ]
  edge
  [
    source 1478
    target 207
    value 0.5
  ]
  edge
  [
    source 1480
    target 1479
    value 1
  ]
  edge
  [
    source 1481
    target 96
    value 0.5
  ]
  edge
  [
    source 1482
    target 1481
    value 0.5
  ]
  edge
  [
    source 1482
    target 96
    value 0.5
  ]
  edge
  [
    source 1484
    target 1483
    value 0.5
  ]
  edge
  [
    source 1485
    target 1483
    value 0.5
  ]
  edge
  [
    source 1485
    target 1484
    value 0.5
  ]
  edge
  [
    source 1487
    target 1486
    value 1
  ]
  edge
  [
    source 1488
    target 1142
    value 0.5
  ]
  edge
  [
    source 1489
    target 1488
    value 0.5
  ]
  edge
  [
    source 1489
    target 1142
    value 0.5
  ]
  edge
  [
    source 1492
    target 1491
    value 1
  ]
  edge
  [
    source 1493
    target 1491
    value 0.25
  ]
  edge
  [
    source 1494
    target 1493
    value 1
  ]
  edge
  [
    source 1496
    target 1495
    value 1
  ]
  edge
  [
    source 1497
    target 300
    value 1
  ]
  edge
  [
    source 1498
    target 82
    value 1
  ]
  edge
  [
    source 1500
    target 239
    value 0.25
  ]
  edge
  [
    source 1501
    target 1500
    value 0.25
  ]
  edge
  [
    source 1501
    target 239
    value 0.25
  ]
  edge
  [
    source 1502
    target 1500
    value 0.25
  ]
  edge
  [
    source 1502
    target 1501
    value 0.25
  ]
  edge
  [
    source 1502
    target 239
    value 0.25
  ]
  edge
  [
    source 1503
    target 1500
    value 0.25
  ]
  edge
  [
    source 1503
    target 1501
    value 0.25
  ]
  edge
  [
    source 1503
    target 239
    value 0.25
  ]
  edge
  [
    source 1503
    target 1502
    value 0.25
  ]
  edge
  [
    source 1504
    target 1000
    value 0.5
  ]
  edge
  [
    source 1505
    target 1504
    value 0.2
  ]
  edge
  [
    source 1506
    target 1504
    value 0.2
  ]
  edge
  [
    source 1506
    target 1505
    value 0.2
  ]
  edge
  [
    source 1507
    target 1504
    value 0.2
  ]
  edge
  [
    source 1507
    target 1505
    value 0.2
  ]
  edge
  [
    source 1507
    target 1506
    value 0.2
  ]
  edge
  [
    source 1508
    target 1504
    value 0.2
  ]
  edge
  [
    source 1508
    target 1505
    value 0.2
  ]
  edge
  [
    source 1508
    target 1506
    value 0.2
  ]
  edge
  [
    source 1508
    target 1507
    value 0.2
  ]
  edge
  [
    source 1509
    target 1504
    value 0.2
  ]
  edge
  [
    source 1509
    target 1505
    value 0.2
  ]
  edge
  [
    source 1509
    target 1506
    value 0.2
  ]
  edge
  [
    source 1509
    target 1507
    value 0.2
  ]
  edge
  [
    source 1509
    target 1508
    value 0.2
  ]
  edge
  [
    source 1512
    target 1511
    value 0.5
  ]
  edge
  [
    source 1513
    target 1511
    value 0.5
  ]
  edge
  [
    source 1513
    target 1512
    value 0.5
  ]
  edge
  [
    source 1514
    target 1000
    value 0.5
  ]
  edge
  [
    source 1514
    target 1504
    value 0.5
  ]
  edge
  [
    source 1515
    target 1120
    value 0.333333
  ]
  edge
  [
    source 1516
    target 1120
    value 0.333333
  ]
  edge
  [
    source 1516
    target 1515
    value 0.333333
  ]
  edge
  [
    source 1517
    target 1120
    value 0.333333
  ]
  edge
  [
    source 1517
    target 1515
    value 0.333333
  ]
  edge
  [
    source 1517
    target 1516
    value 0.333333
  ]
  edge
  [
    source 1518
    target 243
    value 0.25
  ]
  edge
  [
    source 1518
    target 927
    value 0.25
  ]
  edge
  [
    source 1519
    target 1518
    value 0.25
  ]
  edge
  [
    source 1519
    target 243
    value 0.25
  ]
  edge
  [
    source 1519
    target 927
    value 0.25
  ]
  edge
  [
    source 1520
    target 1518
    value 0.25
  ]
  edge
  [
    source 1520
    target 1519
    value 0.25
  ]
  edge
  [
    source 1520
    target 243
    value 0.25
  ]
  edge
  [
    source 1520
    target 927
    value 0.25
  ]
  edge
  [
    source 1523
    target 1522
    value 1
  ]
  edge
  [
    source 1526
    target 1525
    value 1
  ]
  edge
  [
    source 1529
    target 54
    value 0.5
  ]
  edge
  [
    source 1529
    target 33
    value 0.5
  ]
  edge
  [
    source 1531
    target 1530
    value 1
  ]
  edge
  [
    source 1532
    target 9
    value 1
  ]
  edge
  [
    source 1533
    target 532
    value 0.2
  ]
  edge
  [
    source 1533
    target 531
    value 0.2
  ]
  edge
  [
    source 1533
    target 530
    value 0.2
  ]
  edge
  [
    source 1534
    target 532
    value 0.2
  ]
  edge
  [
    source 1534
    target 1533
    value 0.2
  ]
  edge
  [
    source 1534
    target 531
    value 0.2
  ]
  edge
  [
    source 1534
    target 530
    value 0.2
  ]
  edge
  [
    source 1535
    target 532
    value 0.2
  ]
  edge
  [
    source 1535
    target 1533
    value 0.2
  ]
  edge
  [
    source 1535
    target 1534
    value 0.2
  ]
  edge
  [
    source 1535
    target 531
    value 0.2
  ]
  edge
  [
    source 1535
    target 530
    value 0.2
  ]
  edge
  [
    source 1536
    target 843
    value 1
  ]
  edge
  [
    source 1538
    target 1537
    value 0.5
  ]
  edge
  [
    source 1539
    target 1537
    value 0.5
  ]
  edge
  [
    source 1539
    target 1538
    value 0.5
  ]
  edge
  [
    source 1540
    target 1493
    value 0.25
  ]
  edge
  [
    source 1540
    target 1491
    value 0.25
  ]
  edge
  [
    source 1541
    target 1540
    value 0.25
  ]
  edge
  [
    source 1541
    target 1493
    value 0.25
  ]
  edge
  [
    source 1541
    target 1491
    value 0.25
  ]
  edge
  [
    source 1542
    target 1540
    value 0.25
  ]
  edge
  [
    source 1542
    target 1541
    value 0.25
  ]
  edge
  [
    source 1542
    target 1493
    value 0.25
  ]
  edge
  [
    source 1542
    target 1491
    value 0.25
  ]
  edge
  [
    source 1544
    target 1543
    value 1
  ]
  edge
  [
    source 1546
    target 1545
    value 0.333333
  ]
  edge
  [
    source 1547
    target 1545
    value 0.333333
  ]
  edge
  [
    source 1547
    target 1546
    value 0.333333
  ]
  edge
  [
    source 1548
    target 1545
    value 0.333333
  ]
  edge
  [
    source 1548
    target 1546
    value 0.333333
  ]
  edge
  [
    source 1548
    target 1547
    value 0.333333
  ]
  edge
  [
    source 1549
    target 308
    value 1
  ]
  edge
  [
    source 1550
    target 34
    value 0.833333
  ]
  edge
  [
    source 1550
    target 33
    value 1.33333
  ]
  edge
  [
    source 1550
    target 54
    value 0.5
  ]
  edge
  [
    source 1551
    target 1550
    value 0.333333
  ]
  edge
  [
    source 1551
    target 34
    value 0.333333
  ]
  edge
  [
    source 1551
    target 33
    value 0.333333
  ]
  edge
  [
    source 1553
    target 294
    value 0.333333
  ]
  edge
  [
    source 1554
    target 294
    value 0.333333
  ]
  edge
  [
    source 1554
    target 1553
    value 0.333333
  ]
  edge
  [
    source 1555
    target 294
    value 0.333333
  ]
  edge
  [
    source 1555
    target 1553
    value 0.333333
  ]
  edge
  [
    source 1555
    target 1554
    value 0.333333
  ]
  edge
  [
    source 1556
    target 676
    value 0.333333
  ]
  edge
  [
    source 1557
    target 1556
    value 0.333333
  ]
  edge
  [
    source 1557
    target 676
    value 0.333333
  ]
  edge
  [
    source 1558
    target 1556
    value 0.333333
  ]
  edge
  [
    source 1558
    target 676
    value 0.333333
  ]
  edge
  [
    source 1558
    target 1557
    value 0.333333
  ]
  edge
  [
    source 1560
    target 1145
    value 0.333333
  ]
  edge
  [
    source 1560
    target 219
    value 0.333333
  ]
  edge
  [
    source 1561
    target 1560
    value 0.333333
  ]
  edge
  [
    source 1561
    target 1145
    value 0.333333
  ]
  edge
  [
    source 1561
    target 219
    value 0.333333
  ]
  edge
  [
    source 1562
    target 63
    value 0.142857
  ]
  edge
  [
    source 1562
    target 62
    value 0.142857
  ]
  edge
  [
    source 1563
    target 1562
    value 0.142857
  ]
  edge
  [
    source 1563
    target 63
    value 0.142857
  ]
  edge
  [
    source 1563
    target 62
    value 0.142857
  ]
  edge
  [
    source 1564
    target 1562
    value 0.142857
  ]
  edge
  [
    source 1564
    target 1563
    value 0.142857
  ]
  edge
  [
    source 1564
    target 63
    value 0.142857
  ]
  edge
  [
    source 1564
    target 62
    value 0.142857
  ]
  edge
  [
    source 1565
    target 1562
    value 0.142857
  ]
  edge
  [
    source 1565
    target 1563
    value 0.142857
  ]
  edge
  [
    source 1565
    target 1564
    value 0.142857
  ]
  edge
  [
    source 1565
    target 63
    value 0.142857
  ]
  edge
  [
    source 1565
    target 62
    value 0.142857
  ]
  edge
  [
    source 1566
    target 1562
    value 0.142857
  ]
  edge
  [
    source 1566
    target 1563
    value 0.142857
  ]
  edge
  [
    source 1566
    target 1564
    value 0.142857
  ]
  edge
  [
    source 1566
    target 1565
    value 0.142857
  ]
  edge
  [
    source 1566
    target 63
    value 0.142857
  ]
  edge
  [
    source 1566
    target 62
    value 0.142857
  ]
  edge
  [
    source 1567
    target 1562
    value 0.142857
  ]
  edge
  [
    source 1567
    target 1563
    value 0.142857
  ]
  edge
  [
    source 1567
    target 1564
    value 0.142857
  ]
  edge
  [
    source 1567
    target 1565
    value 0.142857
  ]
  edge
  [
    source 1567
    target 1566
    value 0.142857
  ]
  edge
  [
    source 1567
    target 63
    value 0.142857
  ]
  edge
  [
    source 1567
    target 62
    value 0.142857
  ]
  edge
  [
    source 1569
    target 1568
    value 1
  ]
  edge
  [
    source 1570
    target 337
    value 0.2
  ]
  edge
  [
    source 1570
    target 631
    value 0.2
  ]
  edge
  [
    source 1571
    target 337
    value 0.2
  ]
  edge
  [
    source 1571
    target 631
    value 0.2
  ]
  edge
  [
    source 1571
    target 1570
    value 0.2
  ]
  edge
  [
    source 1572
    target 337
    value 0.2
  ]
  edge
  [
    source 1572
    target 631
    value 0.2
  ]
  edge
  [
    source 1572
    target 1570
    value 0.2
  ]
  edge
  [
    source 1572
    target 1571
    value 0.2
  ]
  edge
  [
    source 1573
    target 337
    value 0.2
  ]
  edge
  [
    source 1573
    target 631
    value 0.2
  ]
  edge
  [
    source 1573
    target 1570
    value 0.2
  ]
  edge
  [
    source 1573
    target 1571
    value 0.2
  ]
  edge
  [
    source 1573
    target 1572
    value 0.2
  ]
  edge
  [
    source 1574
    target 631
    value 0.5
  ]
  edge
  [
    source 1574
    target 783
    value 0.5
  ]
  edge
  [
    source 1576
    target 1575
    value 0.333333
  ]
  edge
  [
    source 1577
    target 1575
    value 0.333333
  ]
  edge
  [
    source 1577
    target 1576
    value 0.333333
  ]
  edge
  [
    source 1578
    target 1575
    value 0.333333
  ]
  edge
  [
    source 1578
    target 1576
    value 0.333333
  ]
  edge
  [
    source 1578
    target 1577
    value 0.333333
  ]
  edge
  [
    source 1579
    target 631
    value 0.5
  ]
  edge
  [
    source 1579
    target 630
    value 0.5
  ]
  edge
  [
    source 1581
    target 1580
    value 1
  ]
  edge
  [
    source 1584
    target 1583
    value 1
  ]
  edge
  [
    source 1586
    target 1585
    value 1
  ]
  edge
  [
    source 1587
    target 1585
    value 1
  ]
  edge
  [
    source 1588
    target 522
    value 0.5
  ]
  edge
  [
    source 1588
    target 76
    value 0.5
  ]
]
