# Supplementary material
Source: ML conference proceedings conference paper supplement (https://proceedings.neurips.cc/paper_files/paper/2021/hash/a5e308070bd6dd3cc56283f2313522de-Abstract.html)
Supplement: Supplementary file 1 [file a5e308070bd6dd3cc56283f2313522de-Supplemental.zip › Supplementary Materials/Numerical experiments/Primary School/Data/primary2.gml]

graph
[
directed 0
node
[
id 1538
]
node
[
id 1539
]
node
[
id 1545
]
node
[
id 1546
]
node
[
id 1548
]
node
[
id 1549
]
node
[
id 1551
]
node
[
id 1552
]
node
[
id 1555
]
node
[
id 1558
]
node
[
id 1560
]
node
[
id 1562
]
node
[
id 1563
]
node
[
id 1564
]
node
[
id 1567
]
node
[
id 1570
]
node
[
id 1572
]
node
[
id 1574
]
node
[
id 1578
]
node
[
id 1579
]
node
[
id 1580
]
node
[
id 1585
]
node
[
id 1592
]
node
[
id 1594
]
node
[
id 1601
]
node
[
id 1603
]
node
[
id 1604
]
node
[
id 1606
]
node
[
id 1609
]
node
[
id 1613
]
node
[
id 1616
]
node
[
id 1617
]
node
[
id 1618
]
node
[
id 1625
]
node
[
id 1628
]
node
[
id 1630
]
node
[
id 1632
]
node
[
id 1637
]
node
[
id 1641
]
node
[
id 1643
]
node
[
id 1647
]
node
[
id 1648
]
node
[
id 1649
]
node
[
id 1650
]
node
[
id 1653
]
node
[
id 1656
]
node
[
id 1661
]
node
[
id 1663
]
node
[
id 1664
]
node
[
id 1665
]
node
[
id 1666
]
node
[
id 1668
]
node
[
id 1670
]
node
[
id 1673
]
node
[
id 1674
]
node
[
id 1675
]
node
[
id 1680
]
node
[
id 1681
]
node
[
id 1682
]
node
[
id 1684
]
node
[
id 1685
]
node
[
id 1687
]
node
[
id 1688
]
node
[
id 1695
]
node
[
id 1696
]
node
[
id 1697
]
node
[
id 1698
]
node
[
id 1700
]
node
[
id 1702
]
node
[
id 1704
]
node
[
id 1705
]
node
[
id 1706
]
node
[
id 1707
]
node
[
id 1708
]
node
[
id 1709
]
node
[
id 1710
]
node
[
id 1711
]
node
[
id 1712
]
node
[
id 1713
]
node
[
id 1714
]
node
[
id 1715
]
node
[
id 1718
]
node
[
id 1719
]
node
[
id 1720
]
node
[
id 1722
]
node
[
id 1723
]
node
[
id 1727
]
node
[
id 1730
]
node
[
id 1731
]
node
[
id 1732
]
node
[
id 1737
]
node
[
id 1738
]
node
[
id 1739
]
node
[
id 1741
]
node
[
id 1743
]
node
[
id 1744
]
node
[
id 1745
]
node
[
id 1746
]
node
[
id 1748
]
node
[
id 1749
]
node
[
id 1750
]
node
[
id 1751
]
node
[
id 1752
]
node
[
id 1753
]
node
[
id 1757
]
node
[
id 1759
]
node
[
id 1760
]
node
[
id 1761
]
node
[
id 1763
]
node
[
id 1764
]
node
[
id 1765
]
node
[
id 1766
]
node
[
id 1767
]
node
[
id 1768
]
node
[
id 1770
]
node
[
id 1772
]
node
[
id 1774
]
node
[
id 1775
]
node
[
id 1778
]
node
[
id 1779
]
node
[
id 1780
]
node
[
id 1782
]
node
[
id 1783
]
node
[
id 1787
]
node
[
id 1789
]
node
[
id 1790
]
node
[
id 1792
]
node
[
id 1795
]
node
[
id 1796
]
node
[
id 1797
]
node
[
id 1798
]
node
[
id 1799
]
node
[
id 1800
]
node
[
id 1801
]
node
[
id 1802
]
node
[
id 1803
]
node
[
id 1805
]
node
[
id 1807
]
node
[
id 1809
]
node
[
id 1815
]
node
[
id 1818
]
node
[
id 1819
]
node
[
id 1820
]
node
[
id 1821
]
node
[
id 1822
]
node
[
id 1824
]
node
[
id 1831
]
node
[
id 1833
]
node
[
id 1835
]
node
[
id 1836
]
node
[
id 1837
]
node
[
id 1838
]
node
[
id 1843
]
node
[
id 1847
]
node
[
id 1851
]
node
[
id 1852
]
node
[
id 1854
]
node
[
id 1855
]
node
[
id 1857
]
node
[
id 1858
]
node
[
id 1859
]
node
[
id 1861
]
node
[
id 1863
]
node
[
id 1865
]
node
[
id 1866
]
node
[
id 1872
]
node
[
id 1877
]
node
[
id 1880
]
node
[
id 1883
]
node
[
id 1885
]
node
[
id 1887
]
node
[
id 1888
]
node
[
id 1889
]
node
[
id 1890
]
node
[
id 1895
]
node
[
id 1897
]
node
[
id 1898
]
node
[
id 1902
]
node
[
id 1906
]
node
[
id 1907
]
node
[
id 1908
]
node
[
id 1909
]
node
[
id 1910
]
node
[
id 1911
]
node
[
id 1912
]
node
[
id 1913
]
node
[
id 1916
]
node
[
id 1917
]
node
[
id 1919
]
node
[
id 1920
]
node
[
id 1922
]
node
[
id 1426
]
node
[
id 1427
]
node
[
id 1428
]
node
[
id 1429
]
node
[
id 1431
]
node
[
id 1434
]
node
[
id 1435
]
node
[
id 1437
]
node
[
id 1439
]
node
[
id 1441
]
node
[
id 1443
]
node
[
id 1451
]
node
[
id 1452
]
node
[
id 1453
]
node
[
id 1457
]
node
[
id 1458
]
node
[
id 1459
]
node
[
id 1461
]
node
[
id 1465
]
node
[
id 1468
]
node
[
id 1471
]
node
[
id 1475
]
node
[
id 1477
]
node
[
id 1479
]
node
[
id 1480
]
node
[
id 1482
]
node
[
id 1483
]
node
[
id 1486
]
node
[
id 1489
]
node
[
id 1493
]
node
[
id 1495
]
node
[
id 1498
]
node
[
id 1500
]
node
[
id 1501
]
node
[
id 1502
]
node
[
id 1503
]
node
[
id 1504
]
node
[
id 1516
]
node
[
id 1519
]
node
[
id 1520
]
node
[
id 1521
]
node
[
id 1522
]
node
[
id 1524
]
node
[
id 1525
]
node
[
id 1528
]
node
[
id 1532
]
node
[
id 1533
]
edge
[
source 1538
target 1665
duration 40
count 2
]
edge
[
source 1538
target 1539
duration 100
count 4
]
edge
[
source 1538
target 1797
duration 20
count 1
]
edge
[
source 1538
target 1670
duration 40
count 1
]
edge
[
source 1538
target 1546
duration 220
count 5
]
edge
[
source 1538
target 1548
duration 20
count 1
]
edge
[
source 1538
target 1549
duration 40
count 2
]
edge
[
source 1538
target 1815
duration 240
count 11
]
edge
[
source 1538
target 1688
duration 40
count 1
]
edge
[
source 1538
target 1698
duration 20
count 1
]
edge
[
source 1538
target 1705
duration 100
count 4
]
edge
[
source 1538
target 1730
duration 100
count 2
]
edge
[
source 1538
target 1618
duration 280
count 7
]
edge
[
source 1538
target 1500
duration 60
count 2
]
edge
[
source 1538
target 1503
duration 80
count 2
]
edge
[
source 1538
target 1504
duration 20
count 1
]
edge
[
source 1538
target 1519
duration 20
count 1
]
edge
[
source 1538
target 1524
duration 60
count 3
]
edge
[
source 1538
target 1525
duration 20
count 1
]
edge
[
source 1538
target 1528
duration 120
count 5
]
edge
[
source 1538
target 1532
duration 300
count 12
]
edge
[
source 1538
target 1533
duration 140
count 6
]
edge
[
source 1539
target 1504
duration 260
count 9
]
edge
[
source 1539
target 1792
duration 20
count 1
]
edge
[
source 1539
target 1545
duration 80
count 4
]
edge
[
source 1539
target 1797
duration 20
count 1
]
edge
[
source 1539
target 1670
duration 20
count 1
]
edge
[
source 1539
target 1532
duration 40
count 1
]
edge
[
source 1539
target 1546
duration 20
count 1
]
edge
[
source 1539
target 1815
duration 300
count 10
]
edge
[
source 1539
target 1548
duration 120
count 5
]
edge
[
source 1539
target 1730
duration 60
count 2
]
edge
[
source 1539
target 1837
duration 20
count 1
]
edge
[
source 1539
target 1618
duration 20
count 1
]
edge
[
source 1539
target 1524
duration 180
count 7
]
edge
[
source 1539
target 1653
duration 120
count 4
]
edge
[
source 1539
target 1705
duration 80
count 4
]
edge
[
source 1539
target 1528
duration 60
count 2
]
edge
[
source 1539
target 1519
duration 40
count 2
]
edge
[
source 1539
target 1500
duration 200
count 7
]
edge
[
source 1539
target 1533
duration 20
count 1
]
edge
[
source 1539
target 1503
duration 160
count 5
]
edge
[
source 1545
target 1664
duration 20
count 1
]
edge
[
source 1545
target 1665
duration 100
count 3
]
edge
[
source 1545
target 1666
duration 80
count 2
]
edge
[
source 1545
target 1797
duration 1280
count 34
]
edge
[
source 1545
target 1546
duration 40
count 2
]
edge
[
source 1545
target 1675
duration 20
count 1
]
edge
[
source 1545
target 1548
duration 220
count 9
]
edge
[
source 1545
target 1549
duration 60
count 2
]
edge
[
source 1545
target 1426
duration 20
count 1
]
edge
[
source 1545
target 1428
duration 40
count 2
]
edge
[
source 1545
target 1815
duration 40
count 2
]
edge
[
source 1545
target 1434
duration 20
count 1
]
edge
[
source 1545
target 1821
duration 20
count 1
]
edge
[
source 1545
target 1439
duration 200
count 9
]
edge
[
source 1545
target 1696
duration 20
count 1
]
edge
[
source 1545
target 1697
duration 40
count 2
]
edge
[
source 1545
target 1698
duration 640
count 17
]
edge
[
source 1545
target 1443
duration 20
count 1
]
edge
[
source 1545
target 1705
duration 2600
count 72
]
edge
[
source 1545
target 1835
duration 60
count 2
]
edge
[
source 1545
target 1837
duration 2080
count 53
]
edge
[
source 1545
target 1458
duration 20
count 1
]
edge
[
source 1545
target 1847
duration 1000
count 26
]
edge
[
source 1545
target 1695
duration 20
count 1
]
edge
[
source 1545
target 1468
duration 20
count 1
]
edge
[
source 1545
target 1482
duration 20
count 1
]
edge
[
source 1545
target 1653
duration 80
count 4
]
edge
[
source 1545
target 1730
duration 20
count 1
]
edge
[
source 1545
target 1477
duration 40
count 1
]
edge
[
source 1545
target 1480
duration 140
count 5
]
edge
[
source 1545
target 1866
duration 840
count 29
]
edge
[
source 1545
target 1486
duration 20
count 1
]
edge
[
source 1545
target 1656
duration 20
count 1
]
edge
[
source 1545
target 1618
duration 20
count 1
]
edge
[
source 1545
target 1753
duration 20
count 1
]
edge
[
source 1545
target 1498
duration 60
count 3
]
edge
[
source 1545
target 1500
duration 460
count 15
]
edge
[
source 1545
target 1503
duration 280
count 10
]
edge
[
source 1545
target 1504
duration 200
count 10
]
edge
[
source 1545
target 1761
duration 20
count 1
]
edge
[
source 1545
target 1890
duration 20
count 1
]
edge
[
source 1545
target 1765
duration 40
count 2
]
edge
[
source 1545
target 1887
duration 20
count 1
]
edge
[
source 1545
target 1525
duration 20
count 1
]
edge
[
source 1545
target 1528
duration 320
count 14
]
edge
[
source 1545
target 1684
duration 80
count 3
]
edge
[
source 1545
target 1532
duration 80
count 4
]
edge
[
source 1545
target 1533
duration 180
count 7
]
edge
[
source 1545
target 1922
duration 20
count 1
]
edge
[
source 1546
target 1664
duration 40
count 2
]
edge
[
source 1546
target 1665
duration 60
count 3
]
edge
[
source 1546
target 1675
duration 140
count 2
]
edge
[
source 1546
target 1548
duration 720
count 28
]
edge
[
source 1546
target 1549
duration 340
count 11
]
edge
[
source 1546
target 1815
duration 140
count 5
]
edge
[
source 1546
target 1437
duration 20
count 1
]
edge
[
source 1546
target 1434
duration 140
count 4
]
edge
[
source 1546
target 1563
duration 20
count 1
]
edge
[
source 1546
target 1821
duration 920
count 32
]
edge
[
source 1546
target 1695
duration 140
count 4
]
edge
[
source 1546
target 1696
duration 40
count 2
]
edge
[
source 1546
target 1697
duration 40
count 2
]
edge
[
source 1546
target 1457
duration 100
count 4
]
edge
[
source 1546
target 1705
duration 100
count 5
]
edge
[
source 1546
target 1579
duration 20
count 1
]
edge
[
source 1546
target 1837
duration 80
count 4
]
edge
[
source 1546
target 1711
duration 20
count 1
]
edge
[
source 1546
target 1585
duration 60
count 3
]
edge
[
source 1546
target 1458
duration 40
count 2
]
edge
[
source 1546
target 1718
duration 20
count 1
]
edge
[
source 1546
target 1857
duration 220
count 10
]
edge
[
source 1546
target 1730
duration 240
count 8
]
edge
[
source 1546
target 1835
duration 720
count 19
]
edge
[
source 1546
target 1866
duration 20
count 1
]
edge
[
source 1546
target 1613
duration 20
count 1
]
edge
[
source 1546
target 1486
duration 20
count 1
]
edge
[
source 1546
target 1528
duration 500
count 19
]
edge
[
source 1546
target 1751
duration 20
count 1
]
edge
[
source 1546
target 1498
duration 20
count 1
]
edge
[
source 1546
target 1500
duration 100
count 4
]
edge
[
source 1546
target 1885
duration 140
count 5
]
edge
[
source 1546
target 1503
duration 860
count 24
]
edge
[
source 1546
target 1504
duration 20
count 1
]
edge
[
source 1546
target 1895
duration 120
count 5
]
edge
[
source 1546
target 1768
duration 20
count 1
]
edge
[
source 1546
target 1521
duration 20
count 1
]
edge
[
source 1546
target 1906
duration 80
count 1
]
edge
[
source 1546
target 1524
duration 60
count 3
]
edge
[
source 1546
target 1653
duration 120
count 5
]
edge
[
source 1546
target 1666
duration 60
count 2
]
edge
[
source 1546
target 1912
duration 20
count 1
]
edge
[
source 1546
target 1532
duration 60
count 3
]
edge
[
source 1546
target 1533
duration 480
count 17
]
edge
[
source 1548
target 1664
duration 620
count 18
]
edge
[
source 1548
target 1665
duration 120
count 6
]
edge
[
source 1548
target 1797
duration 700
count 28
]
edge
[
source 1548
target 1670
duration 20
count 1
]
edge
[
source 1548
target 1673
duration 40
count 2
]
edge
[
source 1548
target 1549
duration 80
count 4
]
edge
[
source 1548
target 1551
duration 20
count 1
]
edge
[
source 1548
target 1426
duration 20
count 1
]
edge
[
source 1548
target 1815
duration 100
count 4
]
edge
[
source 1548
target 1434
duration 120
count 5
]
edge
[
source 1548
target 1563
duration 20
count 1
]
edge
[
source 1548
target 1821
duration 60
count 3
]
edge
[
source 1548
target 1822
duration 20
count 1
]
edge
[
source 1548
target 1439
duration 40
count 1
]
edge
[
source 1548
target 1696
duration 40
count 2
]
edge
[
source 1548
target 1697
duration 60
count 3
]
edge
[
source 1548
target 1698
duration 60
count 2
]
edge
[
source 1548
target 1443
duration 40
count 2
]
edge
[
source 1548
target 1585
duration 20
count 1
]
edge
[
source 1548
target 1705
duration 440
count 16
]
edge
[
source 1548
target 1835
duration 40
count 2
]
edge
[
source 1548
target 1452
duration 100
count 5
]
edge
[
source 1548
target 1837
duration 1260
count 35
]
edge
[
source 1548
target 1501
duration 20
count 1
]
edge
[
source 1548
target 1457
duration 60
count 3
]
edge
[
source 1548
target 1458
duration 640
count 16
]
edge
[
source 1548
target 1592
duration 40
count 1
]
edge
[
source 1548
target 1465
duration 20
count 1
]
edge
[
source 1548
target 1722
duration 20
count 1
]
edge
[
source 1548
target 1695
duration 60
count 2
]
edge
[
source 1548
target 1468
duration 20
count 1
]
edge
[
source 1548
target 1653
duration 500
count 11
]
edge
[
source 1548
target 1857
duration 60
count 3
]
edge
[
source 1548
target 1730
duration 260
count 10
]
edge
[
source 1548
target 1818
duration 140
count 4
]
edge
[
source 1548
target 1477
duration 20
count 1
]
edge
[
source 1548
target 1480
duration 20
count 1
]
edge
[
source 1548
target 1656
duration 20
count 1
]
edge
[
source 1548
target 1482
duration 40
count 2
]
edge
[
source 1548
target 1912
duration 100
count 4
]
edge
[
source 1548
target 1618
duration 160
count 5
]
edge
[
source 1548
target 1493
duration 20
count 1
]
edge
[
source 1548
target 1751
duration 80
count 3
]
edge
[
source 1548
target 1498
duration 20
count 1
]
edge
[
source 1548
target 1500
duration 760
count 22
]
edge
[
source 1548
target 1757
duration 20
count 1
]
edge
[
source 1548
target 1503
duration 200
count 8
]
edge
[
source 1548
target 1504
duration 420
count 14
]
edge
[
source 1548
target 1789
duration 20
count 1
]
edge
[
source 1548
target 1765
duration 20
count 1
]
edge
[
source 1548
target 1895
duration 80
count 3
]
edge
[
source 1548
target 1647
duration 40
count 2
]
edge
[
source 1548
target 1649
duration 20
count 1
]
edge
[
source 1548
target 1908
duration 20
count 1
]
edge
[
source 1548
target 1525
duration 340
count 14
]
edge
[
source 1548
target 1666
duration 20
count 1
]
edge
[
source 1548
target 1783
duration 20
count 1
]
edge
[
source 1548
target 1528
duration 600
count 15
]
edge
[
source 1548
target 1532
duration 1360
count 33
]
edge
[
source 1548
target 1533
duration 360
count 14
]
edge
[
source 1549
target 1665
duration 20
count 1
]
edge
[
source 1549
target 1795
duration 40
count 2
]
edge
[
source 1549
target 1797
duration 80
count 4
]
edge
[
source 1549
target 1675
duration 120
count 5
]
edge
[
source 1549
target 1837
duration 80
count 4
]
edge
[
source 1549
target 1684
duration 120
count 6
]
edge
[
source 1549
target 1815
duration 80
count 2
]
edge
[
source 1549
target 1688
duration 20
count 1
]
edge
[
source 1549
target 1563
duration 20
count 1
]
edge
[
source 1549
target 1564
duration 40
count 1
]
edge
[
source 1549
target 1821
duration 40
count 1
]
edge
[
source 1549
target 1695
duration 40
count 2
]
edge
[
source 1549
target 1696
duration 140
count 6
]
edge
[
source 1549
target 1697
duration 20
count 1
]
edge
[
source 1549
target 1705
duration 20
count 1
]
edge
[
source 1549
target 1835
duration 80
count 2
]
edge
[
source 1549
target 1708
duration 40
count 1
]
edge
[
source 1549
target 1709
duration 20
count 1
]
edge
[
source 1549
target 1838
duration 20
count 1
]
edge
[
source 1549
target 1885
duration 160
count 6
]
edge
[
source 1549
target 1801
duration 20
count 1
]
edge
[
source 1549
target 1592
duration 20
count 1
]
edge
[
source 1549
target 1722
duration 20
count 1
]
edge
[
source 1549
target 1851
duration 40
count 2
]
edge
[
source 1549
target 1730
duration 1560
count 40
]
edge
[
source 1549
target 1673
duration 20
count 1
]
edge
[
source 1549
target 1847
duration 120
count 5
]
edge
[
source 1549
target 1618
duration 40
count 1
]
edge
[
source 1549
target 1439
duration 20
count 1
]
edge
[
source 1549
target 1551
duration 100
count 2
]
edge
[
source 1549
target 1628
duration 40
count 1
]
edge
[
source 1549
target 1757
duration 20
count 1
]
edge
[
source 1549
target 1503
duration 100
count 5
]
edge
[
source 1549
target 1504
duration 80
count 3
]
edge
[
source 1549
target 1765
duration 260
count 12
]
edge
[
source 1549
target 1500
duration 20
count 1
]
edge
[
source 1549
target 1525
duration 20
count 1
]
edge
[
source 1549
target 1912
duration 20
count 1
]
edge
[
source 1549
target 1428
duration 60
count 2
]
edge
[
source 1549
target 1532
duration 840
count 16
]
edge
[
source 1549
target 1533
duration 380
count 13
]
edge
[
source 1549
target 1790
duration 20
count 1
]
edge
[
source 1551
target 1664
duration 20
count 1
]
edge
[
source 1551
target 1922
duration 20
count 1
]
edge
[
source 1551
target 1579
duration 640
count 18
]
edge
[
source 1551
target 1501
duration 20
count 1
]
edge
[
source 1551
target 1820
duration 280
count 8
]
edge
[
source 1551
target 1799
duration 20
count 1
]
edge
[
source 1551
target 1800
duration 20
count 1
]
edge
[
source 1551
target 1801
duration 360
count 12
]
edge
[
source 1551
target 1674
duration 20
count 1
]
edge
[
source 1551
target 1675
duration 20
count 1
]
edge
[
source 1551
target 1552
duration 220
count 10
]
edge
[
source 1551
target 1809
duration 40
count 2
]
edge
[
source 1551
target 1555
duration 320
count 14
]
edge
[
source 1551
target 1685
duration 180
count 7
]
edge
[
source 1551
target 1558
duration 220
count 8
]
edge
[
source 1551
target 1625
duration 80
count 3
]
edge
[
source 1551
target 1560
duration 280
count 13
]
edge
[
source 1551
target 1668
duration 40
count 1
]
edge
[
source 1551
target 1562
duration 220
count 9
]
edge
[
source 1551
target 1564
duration 1820
count 36
]
edge
[
source 1551
target 1822
duration 600
count 22
]
edge
[
source 1551
target 1567
duration 100
count 3
]
edge
[
source 1551
target 1696
duration 20
count 1
]
edge
[
source 1551
target 1570
duration 1140
count 34
]
edge
[
source 1551
target 1572
duration 420
count 18
]
edge
[
source 1551
target 1574
duration 40
count 2
]
edge
[
source 1551
target 1851
duration 940
count 25
]
edge
[
source 1551
target 1706
duration 20
count 1
]
edge
[
source 1551
target 1707
duration 300
count 11
]
edge
[
source 1551
target 1580
duration 300
count 12
]
edge
[
source 1551
target 1709
duration 80
count 3
]
edge
[
source 1551
target 1838
duration 20
count 1
]
edge
[
source 1551
target 1757
duration 80
count 3
]
edge
[
source 1551
target 1712
duration 340
count 12
]
edge
[
source 1551
target 1457
duration 40
count 2
]
edge
[
source 1551
target 1714
duration 120
count 3
]
edge
[
source 1551
target 1843
duration 180
count 6
]
edge
[
source 1551
target 1719
duration 40
count 2
]
edge
[
source 1551
target 1720
duration 80
count 3
]
edge
[
source 1551
target 1465
duration 20
count 1
]
edge
[
source 1551
target 1594
duration 740
count 31
]
edge
[
source 1551
target 1723
duration 80
count 4
]
edge
[
source 1551
target 1727
duration 140
count 6
]
edge
[
source 1551
target 1857
duration 20
count 1
]
edge
[
source 1551
target 1730
duration 40
count 2
]
edge
[
source 1551
target 1859
duration 140
count 5
]
edge
[
source 1551
target 1737
duration 20
count 1
]
edge
[
source 1551
target 1738
duration 200
count 7
]
edge
[
source 1551
target 1911
duration 80
count 3
]
edge
[
source 1551
target 1741
duration 100
count 2
]
edge
[
source 1551
target 1907
duration 80
count 2
]
edge
[
source 1551
target 1613
duration 60
count 3
]
edge
[
source 1551
target 1744
duration 340
count 13
]
edge
[
source 1551
target 1617
duration 20
count 1
]
edge
[
source 1551
target 1746
duration 20
count 1
]
edge
[
source 1551
target 1748
duration 40
count 2
]
edge
[
source 1551
target 1877
duration 20
count 1
]
edge
[
source 1551
target 1751
duration 40
count 1
]
edge
[
source 1551
target 1700
duration 100
count 4
]
edge
[
source 1551
target 1628
duration 20
count 1
]
edge
[
source 1551
target 1722
duration 280
count 11
]
edge
[
source 1551
target 1887
duration 80
count 4
]
edge
[
source 1551
target 1889
duration 20
count 1
]
edge
[
source 1551
target 1890
duration 20
count 1
]
edge
[
source 1551
target 1763
duration 220
count 9
]
edge
[
source 1551
target 1765
duration 40
count 2
]
edge
[
source 1551
target 1768
duration 40
count 2
]
edge
[
source 1551
target 1898
duration 40
count 2
]
edge
[
source 1551
target 1774
duration 20
count 1
]
edge
[
source 1551
target 1731
duration 80
count 4
]
edge
[
source 1551
target 1708
duration 120
count 6
]
edge
[
source 1551
target 1779
duration 20
count 1
]
edge
[
source 1551
target 1780
duration 880
count 26
]
edge
[
source 1551
target 1909
duration 100
count 5
]
edge
[
source 1551
target 1782
duration 640
count 15
]
edge
[
source 1551
target 1833
duration 800
count 26
]
edge
[
source 1551
target 1912
duration 20
count 1
]
edge
[
source 1551
target 1795
duration 840
count 30
]
edge
[
source 1551
target 1855
duration 40
count 2
]
edge
[
source 1551
target 1916
duration 40
count 2
]
edge
[
source 1551
target 1824
duration 20
count 1
]
edge
[
source 1551
target 1790
duration 60
count 3
]
edge
[
source 1551
target 1493
duration 20
count 1
]
edge
[
source 1552
target 1665
duration 20
count 1
]
edge
[
source 1552
target 1795
duration 80
count 4
]
edge
[
source 1552
target 1859
duration 2280
count 22
]
edge
[
source 1552
target 1798
duration 20
count 1
]
edge
[
source 1552
target 1799
duration 20
count 1
]
edge
[
source 1552
target 1800
duration 60
count 3
]
edge
[
source 1552
target 1801
duration 120
count 5
]
edge
[
source 1552
target 1675
duration 20
count 1
]
edge
[
source 1552
target 1858
duration 20
count 1
]
edge
[
source 1552
target 1681
duration 20
count 1
]
edge
[
source 1552
target 1555
duration 980
count 25
]
edge
[
source 1552
target 1685
duration 1240
count 21
]
edge
[
source 1552
target 1558
duration 480
count 14
]
edge
[
source 1552
target 1687
duration 20
count 1
]
edge
[
source 1552
target 1560
duration 280
count 8
]
edge
[
source 1552
target 1796
duration 20
count 1
]
edge
[
source 1552
target 1562
duration 1020
count 19
]
edge
[
source 1552
target 1563
duration 20
count 1
]
edge
[
source 1552
target 1564
duration 300
count 14
]
edge
[
source 1552
target 1437
duration 20
count 1
]
edge
[
source 1552
target 1567
duration 40
count 2
]
edge
[
source 1552
target 1697
duration 20
count 1
]
edge
[
source 1552
target 1570
duration 600
count 21
]
edge
[
source 1552
target 1700
duration 560
count 21
]
edge
[
source 1552
target 1574
duration 260
count 10
]
edge
[
source 1552
target 1833
duration 260
count 9
]
edge
[
source 1552
target 1579
duration 760
count 28
]
edge
[
source 1552
target 1580
duration 420
count 14
]
edge
[
source 1552
target 1709
duration 40
count 2
]
edge
[
source 1552
target 1757
duration 80
count 3
]
edge
[
source 1552
target 1712
duration 380
count 10
]
edge
[
source 1552
target 1457
duration 20
count 1
]
edge
[
source 1552
target 1843
duration 20
count 1
]
edge
[
source 1552
target 1719
duration 100
count 5
]
edge
[
source 1552
target 1720
duration 220
count 5
]
edge
[
source 1552
target 1722
duration 160
count 6
]
edge
[
source 1552
target 1851
duration 20
count 1
]
edge
[
source 1552
target 1727
duration 60
count 2
]
edge
[
source 1552
target 1730
duration 20
count 1
]
edge
[
source 1552
target 1731
duration 280
count 10
]
edge
[
source 1552
target 1707
duration 140
count 5
]
edge
[
source 1552
target 1761
duration 60
count 2
]
edge
[
source 1552
target 1673
duration 20
count 1
]
edge
[
source 1552
target 1738
duration 100
count 3
]
edge
[
source 1552
target 1744
duration 60
count 2
]
edge
[
source 1552
target 1489
duration 20
count 1
]
edge
[
source 1552
target 1748
duration 160
count 3
]
edge
[
source 1552
target 1749
duration 20
count 1
]
edge
[
source 1552
target 1751
duration 20
count 1
]
edge
[
source 1552
target 1572
duration 500
count 11
]
edge
[
source 1552
target 1498
duration 20
count 1
]
edge
[
source 1552
target 1452
duration 40
count 2
]
edge
[
source 1552
target 1628
duration 280
count 10
]
edge
[
source 1552
target 1594
duration 160
count 8
]
edge
[
source 1552
target 1889
duration 20
count 1
]
edge
[
source 1552
target 1890
duration 60
count 2
]
edge
[
source 1552
target 1763
duration 80
count 4
]
edge
[
source 1552
target 1765
duration 20
count 1
]
edge
[
source 1552
target 1495
duration 20
count 1
]
edge
[
source 1552
target 1617
duration 80
count 2
]
edge
[
source 1552
target 1768
duration 380
count 9
]
edge
[
source 1552
target 1898
duration 20
count 1
]
edge
[
source 1552
target 1643
duration 40
count 1
]
edge
[
source 1552
target 1902
duration 40
count 2
]
edge
[
source 1552
target 1661
duration 20
count 1
]
edge
[
source 1552
target 1778
duration 40
count 2
]
edge
[
source 1552
target 1907
duration 40
count 1
]
edge
[
source 1552
target 1780
duration 200
count 6
]
edge
[
source 1552
target 1909
duration 40
count 2
]
edge
[
source 1552
target 1782
duration 20
count 1
]
edge
[
source 1552
target 1911
duration 20
count 1
]
edge
[
source 1552
target 1912
duration 20
count 1
]
edge
[
source 1552
target 1855
duration 20
count 1
]
edge
[
source 1552
target 1916
duration 20
count 1
]
edge
[
source 1552
target 1533
duration 20
count 1
]
edge
[
source 1552
target 1790
duration 100
count 2
]
edge
[
source 1552
target 1493
duration 20
count 1
]
edge
[
source 1555
target 1628
duration 20
count 1
]
edge
[
source 1555
target 1666
duration 40
count 2
]
edge
[
source 1555
target 1707
duration 280
count 10
]
edge
[
source 1555
target 1800
duration 360
count 5
]
edge
[
source 1555
target 1801
duration 140
count 4
]
edge
[
source 1555
target 1688
duration 20
count 1
]
edge
[
source 1555
target 1795
duration 100
count 2
]
edge
[
source 1555
target 1685
duration 1880
count 43
]
edge
[
source 1555
target 1558
duration 1880
count 57
]
edge
[
source 1555
target 1687
duration 20
count 1
]
edge
[
source 1555
target 1560
duration 320
count 12
]
edge
[
source 1555
target 1562
duration 200
count 10
]
edge
[
source 1555
target 1564
duration 180
count 7
]
edge
[
source 1555
target 1822
duration 20
count 1
]
edge
[
source 1555
target 1567
duration 60
count 3
]
edge
[
source 1555
target 1570
duration 400
count 12
]
edge
[
source 1555
target 1700
duration 1060
count 31
]
edge
[
source 1555
target 1574
duration 1020
count 30
]
edge
[
source 1555
target 1833
duration 20
count 1
]
edge
[
source 1555
target 1579
duration 1180
count 47
]
edge
[
source 1555
target 1580
duration 360
count 13
]
edge
[
source 1555
target 1709
duration 100
count 4
]
edge
[
source 1555
target 1838
duration 20
count 1
]
edge
[
source 1555
target 1712
duration 260
count 11
]
edge
[
source 1555
target 1714
duration 40
count 2
]
edge
[
source 1555
target 1719
duration 60
count 3
]
edge
[
source 1555
target 1908
duration 40
count 1
]
edge
[
source 1555
target 1722
duration 1300
count 11
]
edge
[
source 1555
target 1723
duration 20
count 1
]
edge
[
source 1555
target 1727
duration 300
count 11
]
edge
[
source 1555
target 1625
duration 20
count 1
]
edge
[
source 1555
target 1858
duration 20
count 1
]
edge
[
source 1555
target 1731
duration 180
count 7
]
edge
[
source 1555
target 1479
duration 20
count 1
]
edge
[
source 1555
target 1673
duration 20
count 1
]
edge
[
source 1555
target 1738
duration 1320
count 29
]
edge
[
source 1555
target 1741
duration 80
count 4
]
edge
[
source 1555
target 1744
duration 340
count 13
]
edge
[
source 1555
target 1746
duration 20
count 1
]
edge
[
source 1555
target 1748
duration 20
count 1
]
edge
[
source 1555
target 1572
duration 100
count 5
]
edge
[
source 1555
target 1883
duration 20
count 1
]
edge
[
source 1555
target 1695
duration 40
count 2
]
edge
[
source 1555
target 1594
duration 100
count 4
]
edge
[
source 1555
target 1616
duration 20
count 1
]
edge
[
source 1555
target 1765
duration 20
count 1
]
edge
[
source 1555
target 1516
duration 20
count 1
]
edge
[
source 1555
target 1780
duration 20
count 1
]
edge
[
source 1555
target 1656
duration 20
count 1
]
edge
[
source 1558
target 1664
duration 20
count 1
]
edge
[
source 1558
target 1665
duration 20
count 1
]
edge
[
source 1558
target 1579
duration 1660
count 58
]
edge
[
source 1558
target 1837
duration 20
count 1
]
edge
[
source 1558
target 1801
duration 100
count 4
]
edge
[
source 1558
target 1809
duration 20
count 1
]
edge
[
source 1558
target 1685
duration 2960
count 60
]
edge
[
source 1558
target 1731
duration 900
count 22
]
edge
[
source 1558
target 1625
duration 60
count 3
]
edge
[
source 1558
target 1560
duration 240
count 10
]
edge
[
source 1558
target 1562
duration 320
count 11
]
edge
[
source 1558
target 1820
duration 180
count 4
]
edge
[
source 1558
target 1822
duration 200
count 6
]
edge
[
source 1558
target 1567
duration 320
count 9
]
edge
[
source 1558
target 1697
duration 40
count 1
]
edge
[
source 1558
target 1570
duration 220
count 7
]
edge
[
source 1558
target 1572
duration 260
count 10
]
edge
[
source 1558
target 1723
duration 20
count 1
]
edge
[
source 1558
target 1574
duration 1460
count 35
]
edge
[
source 1558
target 1833
duration 100
count 3
]
edge
[
source 1558
target 1707
duration 360
count 11
]
edge
[
source 1558
target 1580
duration 200
count 8
]
edge
[
source 1558
target 1709
duration 40
count 2
]
edge
[
source 1558
target 1710
duration 180
count 9
]
edge
[
source 1558
target 1757
duration 260
count 5
]
edge
[
source 1558
target 1714
duration 20
count 1
]
edge
[
source 1558
target 1843
duration 200
count 5
]
edge
[
source 1558
target 1718
duration 20
count 1
]
edge
[
source 1558
target 1719
duration 260
count 7
]
edge
[
source 1558
target 1720
duration 140
count 5
]
edge
[
source 1558
target 1594
duration 160
count 3
]
edge
[
source 1558
target 1851
duration 80
count 4
]
edge
[
source 1558
target 1727
duration 1100
count 31
]
edge
[
source 1558
target 1859
duration 260
count 4
]
edge
[
source 1558
target 1732
duration 900
count 26
]
edge
[
source 1558
target 1889
duration 20
count 1
]
edge
[
source 1558
target 1737
duration 40
count 1
]
edge
[
source 1558
target 1866
duration 40
count 2
]
edge
[
source 1558
target 1698
duration 40
count 1
]
edge
[
source 1558
target 1486
duration 20
count 1
]
edge
[
source 1558
target 1744
duration 240
count 9
]
edge
[
source 1558
target 1746
duration 20
count 1
]
edge
[
source 1558
target 1748
duration 260
count 8
]
edge
[
source 1558
target 1749
duration 20
count 1
]
edge
[
source 1558
target 1700
duration 380
count 14
]
edge
[
source 1558
target 1498
duration 20
count 1
]
edge
[
source 1558
target 1883
duration 20
count 1
]
edge
[
source 1558
target 1628
duration 200
count 8
]
edge
[
source 1558
target 1722
duration 80
count 3
]
edge
[
source 1558
target 1761
duration 20
count 1
]
edge
[
source 1558
target 1890
duration 1040
count 23
]
edge
[
source 1558
target 1763
duration 60
count 3
]
edge
[
source 1558
target 1895
duration 20
count 1
]
edge
[
source 1558
target 1768
duration 20
count 1
]
edge
[
source 1558
target 1898
duration 40
count 1
]
edge
[
source 1558
target 1643
duration 20
count 1
]
edge
[
source 1558
target 1708
duration 40
count 1
]
edge
[
source 1558
target 1778
duration 100
count 4
]
edge
[
source 1558
target 1907
duration 180
count 5
]
edge
[
source 1558
target 1780
duration 40
count 2
]
edge
[
source 1558
target 1909
duration 60
count 3
]
edge
[
source 1558
target 1782
duration 340
count 11
]
edge
[
source 1558
target 1912
duration 80
count 3
]
edge
[
source 1558
target 1795
duration 220
count 9
]
edge
[
source 1558
target 1855
duration 760
count 22
]
edge
[
source 1558
target 1916
duration 940
count 18
]
edge
[
source 1558
target 1564
duration 520
count 18
]
edge
[
source 1560
target 1666
duration 20
count 1
]
edge
[
source 1560
target 1579
duration 240
count 9
]
edge
[
source 1560
target 1801
duration 80
count 2
]
edge
[
source 1560
target 1674
duration 20
count 1
]
edge
[
source 1560
target 1809
duration 80
count 3
]
edge
[
source 1560
target 1795
duration 40
count 2
]
edge
[
source 1560
target 1685
duration 380
count 15
]
edge
[
source 1560
target 1859
duration 20
count 1
]
edge
[
source 1560
target 1820
duration 40
count 2
]
edge
[
source 1560
target 1562
duration 200
count 8
]
edge
[
source 1560
target 1822
duration 20
count 1
]
edge
[
source 1560
target 1567
duration 60
count 2
]
edge
[
source 1560
target 1570
duration 200
count 9
]
edge
[
source 1560
target 1572
duration 1400
count 39
]
edge
[
source 1560
target 1574
duration 540
count 21
]
edge
[
source 1560
target 1564
duration 120
count 3
]
edge
[
source 1560
target 1707
duration 420
count 19
]
edge
[
source 1560
target 1580
duration 1160
count 38
]
edge
[
source 1560
target 1709
duration 80
count 2
]
edge
[
source 1560
target 1712
duration 140
count 7
]
edge
[
source 1560
target 1459
duration 20
count 1
]
edge
[
source 1560
target 1719
duration 40
count 2
]
edge
[
source 1560
target 1720
duration 20
count 1
]
edge
[
source 1560
target 1594
duration 920
count 36
]
edge
[
source 1560
target 1727
duration 320
count 14
]
edge
[
source 1560
target 1731
duration 1700
count 59
]
edge
[
source 1560
target 1479
duration 20
count 1
]
edge
[
source 1560
target 1737
duration 40
count 2
]
edge
[
source 1560
target 1741
duration 20
count 1
]
edge
[
source 1560
target 1744
duration 1000
count 33
]
edge
[
source 1560
target 1746
duration 20
count 1
]
edge
[
source 1560
target 1748
duration 20
count 1
]
edge
[
source 1560
target 1749
duration 20
count 1
]
edge
[
source 1560
target 1700
duration 1260
count 33
]
edge
[
source 1560
target 1722
duration 40
count 2
]
edge
[
source 1560
target 1702
duration 20
count 1
]
edge
[
source 1560
target 1493
duration 40
count 1
]
edge
[
source 1562
target 1665
duration 20
count 1
]
edge
[
source 1562
target 1795
duration 20
count 1
]
edge
[
source 1562
target 1800
duration 80
count 4
]
edge
[
source 1562
target 1801
duration 120
count 5
]
edge
[
source 1562
target 1675
duration 20
count 1
]
edge
[
source 1562
target 1809
duration 20
count 1
]
edge
[
source 1562
target 1685
duration 380
count 15
]
edge
[
source 1562
target 1687
duration 60
count 3
]
edge
[
source 1562
target 1859
duration 160
count 4
]
edge
[
source 1562
target 1820
duration 20
count 1
]
edge
[
source 1562
target 1822
duration 140
count 6
]
edge
[
source 1562
target 1567
duration 80
count 4
]
edge
[
source 1562
target 1697
duration 20
count 1
]
edge
[
source 1562
target 1570
duration 300
count 10
]
edge
[
source 1562
target 1572
duration 320
count 8
]
edge
[
source 1562
target 1574
duration 1340
count 40
]
edge
[
source 1562
target 1564
duration 60
count 2
]
edge
[
source 1562
target 1707
duration 2240
count 61
]
edge
[
source 1562
target 1580
duration 340
count 9
]
edge
[
source 1562
target 1709
duration 60
count 2
]
edge
[
source 1562
target 1712
duration 440
count 16
]
edge
[
source 1562
target 1714
duration 80
count 3
]
edge
[
source 1562
target 1673
duration 20
count 1
]
edge
[
source 1562
target 1594
duration 180
count 9
]
edge
[
source 1562
target 1727
duration 300
count 9
]
edge
[
source 1562
target 1579
duration 80
count 4
]
edge
[
source 1562
target 1731
duration 360
count 10
]
edge
[
source 1562
target 1738
duration 260
count 9
]
edge
[
source 1562
target 1741
duration 60
count 3
]
edge
[
source 1562
target 1744
duration 180
count 9
]
edge
[
source 1562
target 1877
duration 20
count 1
]
edge
[
source 1562
target 1495
duration 40
count 2
]
edge
[
source 1562
target 1700
duration 660
count 23
]
edge
[
source 1562
target 1761
duration 20
count 1
]
edge
[
source 1562
target 1833
duration 20
count 1
]
edge
[
source 1562
target 1661
duration 20
count 1
]
edge
[
source 1563
target 1664
duration 40
count 2
]
edge
[
source 1563
target 1665
duration 140
count 5
]
edge
[
source 1563
target 1666
duration 160
count 8
]
edge
[
source 1563
target 1797
duration 20
count 1
]
edge
[
source 1563
target 1675
duration 60
count 3
]
edge
[
source 1563
target 1426
duration 180
count 9
]
edge
[
source 1563
target 1427
duration 740
count 22
]
edge
[
source 1563
target 1684
duration 340
count 10
]
edge
[
source 1563
target 1429
duration 700
count 19
]
edge
[
source 1563
target 1431
duration 320
count 14
]
edge
[
source 1563
target 1688
duration 80
count 3
]
edge
[
source 1563
target 1434
duration 60
count 3
]
edge
[
source 1563
target 1435
duration 40
count 2
]
edge
[
source 1563
target 1437
duration 5980
count 129
]
edge
[
source 1563
target 1439
duration 80
count 4
]
edge
[
source 1563
target 1824
duration 20
count 1
]
edge
[
source 1563
target 1441
duration 100
count 4
]
edge
[
source 1563
target 1698
duration 60
count 3
]
edge
[
source 1563
target 1443
duration 480
count 12
]
edge
[
source 1563
target 1457
duration 2520
count 51
]
edge
[
source 1563
target 1705
duration 40
count 2
]
edge
[
source 1563
target 1578
duration 40
count 2
]
edge
[
source 1563
target 1579
duration 20
count 1
]
edge
[
source 1563
target 1501
duration 20
count 1
]
edge
[
source 1563
target 1585
duration 960
count 23
]
edge
[
source 1563
target 1458
duration 40
count 2
]
edge
[
source 1563
target 1617
duration 40
count 1
]
edge
[
source 1563
target 1592
duration 180
count 9
]
edge
[
source 1563
target 1465
duration 620
count 21
]
edge
[
source 1563
target 1695
duration 420
count 16
]
edge
[
source 1563
target 1468
duration 40
count 2
]
edge
[
source 1563
target 1471
duration 80
count 4
]
edge
[
source 1563
target 1730
duration 20
count 1
]
edge
[
source 1563
target 1475
duration 220
count 10
]
edge
[
source 1563
target 1697
duration 40
count 2
]
edge
[
source 1563
target 1480
duration 420
count 14
]
edge
[
source 1563
target 1482
duration 140
count 7
]
edge
[
source 1563
target 1483
duration 140
count 7
]
edge
[
source 1563
target 1613
duration 20
count 1
]
edge
[
source 1563
target 1486
duration 40
count 2
]
edge
[
source 1563
target 1489
duration 540
count 15
]
edge
[
source 1563
target 1493
duration 20
count 1
]
edge
[
source 1563
target 1750
duration 100
count 4
]
edge
[
source 1563
target 1498
duration 220
count 9
]
edge
[
source 1563
target 1500
duration 20
count 1
]
edge
[
source 1563
target 1885
duration 20
count 1
]
edge
[
source 1563
target 1720
duration 40
count 2
]
edge
[
source 1563
target 1503
duration 60
count 3
]
edge
[
source 1563
target 1890
duration 20
count 1
]
edge
[
source 1563
target 1764
duration 20
count 1
]
edge
[
source 1563
target 1637
duration 60
count 2
]
edge
[
source 1563
target 1745
duration 20
count 1
]
edge
[
source 1563
target 1641
duration 40
count 2
]
edge
[
source 1563
target 1898
duration 20
count 1
]
edge
[
source 1563
target 1520
duration 40
count 2
]
edge
[
source 1563
target 1428
duration 300
count 14
]
edge
[
source 1563
target 1533
duration 60
count 3
]
edge
[
source 1564
target 1922
duration 40
count 2
]
edge
[
source 1564
target 1795
duration 240
count 10
]
edge
[
source 1564
target 1859
duration 40
count 2
]
edge
[
source 1564
target 1837
duration 20
count 1
]
edge
[
source 1564
target 1801
duration 320
count 13
]
edge
[
source 1564
target 1666
duration 20
count 1
]
edge
[
source 1564
target 1426
duration 20
count 1
]
edge
[
source 1564
target 1685
duration 300
count 6
]
edge
[
source 1564
target 1822
duration 2220
count 47
]
edge
[
source 1564
target 1570
duration 920
count 29
]
edge
[
source 1564
target 1700
duration 240
count 7
]
edge
[
source 1564
target 1574
duration 60
count 3
]
edge
[
source 1564
target 1704
duration 120
count 5
]
edge
[
source 1564
target 1833
duration 340
count 8
]
edge
[
source 1564
target 1579
duration 340
count 12
]
edge
[
source 1564
target 1580
duration 520
count 17
]
edge
[
source 1564
target 1709
duration 40
count 2
]
edge
[
source 1564
target 1757
duration 20
count 1
]
edge
[
source 1564
target 1712
duration 100
count 5
]
edge
[
source 1564
target 1714
duration 20
count 1
]
edge
[
source 1564
target 1843
duration 180
count 3
]
edge
[
source 1564
target 1718
duration 20
count 1
]
edge
[
source 1564
target 1719
duration 260
count 10
]
edge
[
source 1564
target 1720
duration 200
count 5
]
edge
[
source 1564
target 1594
duration 240
count 11
]
edge
[
source 1564
target 1851
duration 440
count 16
]
edge
[
source 1564
target 1855
duration 60
count 2
]
edge
[
source 1564
target 1730
duration 40
count 1
]
edge
[
source 1564
target 1731
duration 240
count 7
]
edge
[
source 1564
target 1707
duration 600
count 13
]
edge
[
source 1564
target 1889
duration 80
count 3
]
edge
[
source 1564
target 1673
duration 20
count 1
]
edge
[
source 1564
target 1737
duration 20
count 1
]
edge
[
source 1564
target 1866
duration 20
count 1
]
edge
[
source 1564
target 1847
duration 20
count 1
]
edge
[
source 1564
target 1741
duration 20
count 1
]
edge
[
source 1564
target 1744
duration 180
count 6
]
edge
[
source 1564
target 1617
duration 20
count 1
]
edge
[
source 1564
target 1748
duration 160
count 6
]
edge
[
source 1564
target 1749
duration 40
count 2
]
edge
[
source 1564
target 1625
duration 40
count 2
]
edge
[
source 1564
target 1628
duration 40
count 2
]
edge
[
source 1564
target 1722
duration 120
count 5
]
edge
[
source 1564
target 1887
duration 40
count 2
]
edge
[
source 1564
target 1761
duration 20
count 1
]
edge
[
source 1564
target 1890
duration 20
count 1
]
edge
[
source 1564
target 1763
duration 20
count 1
]
edge
[
source 1564
target 1767
duration 120
count 4
]
edge
[
source 1564
target 1768
duration 60
count 1
]
edge
[
source 1564
target 1643
duration 20
count 1
]
edge
[
source 1564
target 1902
duration 20
count 1
]
edge
[
source 1564
target 1572
duration 120
count 6
]
edge
[
source 1564
target 1648
duration 40
count 2
]
edge
[
source 1564
target 1708
duration 40
count 1
]
edge
[
source 1564
target 1778
duration 40
count 2
]
edge
[
source 1564
target 1907
duration 100
count 3
]
edge
[
source 1564
target 1780
duration 20
count 1
]
edge
[
source 1564
target 1909
duration 20
count 1
]
edge
[
source 1564
target 1782
duration 160
count 4
]
edge
[
source 1564
target 1911
duration 80
count 1
]
edge
[
source 1564
target 1912
duration 20
count 1
]
edge
[
source 1564
target 1727
duration 180
count 4
]
edge
[
source 1564
target 1916
duration 60
count 2
]
edge
[
source 1564
target 1790
duration 60
count 3
]
edge
[
source 1567
target 1795
duration 60
count 2
]
edge
[
source 1567
target 1801
duration 40
count 2
]
edge
[
source 1567
target 1731
duration 40
count 2
]
edge
[
source 1567
target 1685
duration 40
count 2
]
edge
[
source 1567
target 1820
duration 100
count 4
]
edge
[
source 1567
target 1822
duration 120
count 5
]
edge
[
source 1567
target 1700
duration 80
count 3
]
edge
[
source 1567
target 1574
duration 40
count 2
]
edge
[
source 1567
target 1833
duration 20
count 1
]
edge
[
source 1567
target 1707
duration 200
count 9
]
edge
[
source 1567
target 1580
duration 160
count 6
]
edge
[
source 1567
target 1709
duration 2220
count 31
]
edge
[
source 1567
target 1712
duration 40
count 2
]
edge
[
source 1567
target 1714
duration 80
count 4
]
edge
[
source 1567
target 1843
duration 60
count 3
]
edge
[
source 1567
target 1594
duration 120
count 5
]
edge
[
source 1567
target 1727
duration 160
count 5
]
edge
[
source 1567
target 1601
duration 20
count 1
]
edge
[
source 1567
target 1859
duration 220
count 9
]
edge
[
source 1567
target 1579
duration 260
count 4
]
edge
[
source 1567
target 1737
duration 60
count 2
]
edge
[
source 1567
target 1744
duration 140
count 5
]
edge
[
source 1567
target 1877
duration 20
count 1
]
edge
[
source 1567
target 1572
duration 20
count 1
]
edge
[
source 1567
target 1722
duration 40
count 2
]
edge
[
source 1567
target 1763
duration 80
count 3
]
edge
[
source 1567
target 1898
duration 40
count 2
]
edge
[
source 1570
target 1795
duration 20
count 1
]
edge
[
source 1570
target 1800
duration 20
count 1
]
edge
[
source 1570
target 1674
duration 20
count 1
]
edge
[
source 1570
target 1859
duration 80
count 4
]
edge
[
source 1570
target 1685
duration 280
count 13
]
edge
[
source 1570
target 1822
duration 40
count 2
]
edge
[
source 1570
target 1572
duration 180
count 4
]
edge
[
source 1570
target 1574
duration 580
count 17
]
edge
[
source 1570
target 1833
duration 20
count 1
]
edge
[
source 1570
target 1579
duration 200
count 9
]
edge
[
source 1570
target 1580
duration 240
count 9
]
edge
[
source 1570
target 1709
duration 180
count 9
]
edge
[
source 1570
target 1712
duration 820
count 26
]
edge
[
source 1570
target 1843
duration 60
count 3
]
edge
[
source 1570
target 1719
duration 60
count 2
]
edge
[
source 1570
target 1720
duration 20
count 1
]
edge
[
source 1570
target 1594
duration 300
count 14
]
edge
[
source 1570
target 1854
duration 20
count 1
]
edge
[
source 1570
target 1727
duration 380
count 10
]
edge
[
source 1570
target 1731
duration 340
count 11
]
edge
[
source 1570
target 1707
duration 160
count 6
]
edge
[
source 1570
target 1737
duration 40
count 1
]
edge
[
source 1570
target 1744
duration 440
count 14
]
edge
[
source 1570
target 1748
duration 40
count 2
]
edge
[
source 1570
target 1700
duration 260
count 6
]
edge
[
source 1570
target 1722
duration 20
count 1
]
edge
[
source 1570
target 1780
duration 60
count 1
]
edge
[
source 1572
target 1664
duration 20
count 1
]
edge
[
source 1572
target 1666
duration 20
count 1
]
edge
[
source 1572
target 1835
duration 20
count 1
]
edge
[
source 1572
target 1668
duration 20
count 1
]
edge
[
source 1572
target 1670
duration 20
count 1
]
edge
[
source 1572
target 1801
duration 60
count 3
]
edge
[
source 1572
target 1674
duration 80
count 3
]
edge
[
source 1572
target 1809
duration 20
count 1
]
edge
[
source 1572
target 1685
duration 340
count 9
]
edge
[
source 1572
target 1687
duration 20
count 1
]
edge
[
source 1572
target 1820
duration 40
count 1
]
edge
[
source 1572
target 1822
duration 60
count 2
]
edge
[
source 1572
target 1700
duration 3100
count 69
]
edge
[
source 1572
target 1574
duration 40
count 2
]
edge
[
source 1572
target 1704
duration 80
count 4
]
edge
[
source 1572
target 1833
duration 40
count 2
]
edge
[
source 1572
target 1579
duration 100
count 5
]
edge
[
source 1572
target 1580
duration 1280
count 40
]
edge
[
source 1572
target 1709
duration 80
count 3
]
edge
[
source 1572
target 1885
duration 20
count 1
]
edge
[
source 1572
target 1712
duration 40
count 2
]
edge
[
source 1572
target 1843
duration 40
count 2
]
edge
[
source 1572
target 1719
duration 100
count 4
]
edge
[
source 1572
target 1594
duration 180
count 8
]
edge
[
source 1572
target 1854
duration 40
count 1
]
edge
[
source 1572
target 1855
duration 20
count 1
]
edge
[
source 1572
target 1857
duration 20
count 1
]
edge
[
source 1572
target 1730
duration 20
count 1
]
edge
[
source 1572
target 1859
duration 220
count 8
]
edge
[
source 1572
target 1861
duration 40
count 1
]
edge
[
source 1572
target 1737
duration 20
count 1
]
edge
[
source 1572
target 1866
duration 20
count 1
]
edge
[
source 1572
target 1847
duration 20
count 1
]
edge
[
source 1572
target 1613
duration 900
count 18
]
edge
[
source 1572
target 1744
duration 140
count 5
]
edge
[
source 1572
target 1656
duration 20
count 1
]
edge
[
source 1572
target 1748
duration 60
count 3
]
edge
[
source 1572
target 1751
duration 40
count 1
]
edge
[
source 1572
target 1498
duration 20
count 1
]
edge
[
source 1572
target 1628
duration 20
count 1
]
edge
[
source 1572
target 1757
duration 60
count 1
]
edge
[
source 1572
target 1887
duration 40
count 2
]
edge
[
source 1572
target 1761
duration 20
count 1
]
edge
[
source 1572
target 1890
duration 20
count 1
]
edge
[
source 1572
target 1763
duration 40
count 2
]
edge
[
source 1572
target 1767
duration 260
count 10
]
edge
[
source 1572
target 1768
duration 20
count 1
]
edge
[
source 1572
target 1731
duration 260
count 11
]
edge
[
source 1572
target 1708
duration 580
count 21
]
edge
[
source 1572
target 1778
duration 20
count 1
]
edge
[
source 1572
target 1907
duration 60
count 2
]
edge
[
source 1572
target 1780
duration 260
count 12
]
edge
[
source 1572
target 1912
duration 300
count 5
]
edge
[
source 1572
target 1727
duration 20
count 1
]
edge
[
source 1572
target 1916
duration 20
count 1
]
edge
[
source 1572
target 1790
duration 40
count 2
]
edge
[
source 1574
target 1795
duration 60
count 3
]
edge
[
source 1574
target 1796
duration 40
count 1
]
edge
[
source 1574
target 1801
duration 40
count 1
]
edge
[
source 1574
target 1809
duration 20
count 1
]
edge
[
source 1574
target 1685
duration 1060
count 23
]
edge
[
source 1574
target 1822
duration 20
count 1
]
edge
[
source 1574
target 1700
duration 1360
count 39
]
edge
[
source 1574
target 1579
duration 800
count 24
]
edge
[
source 1574
target 1580
duration 120
count 5
]
edge
[
source 1574
target 1709
duration 260
count 6
]
edge
[
source 1574
target 1838
duration 40
count 2
]
edge
[
source 1574
target 1711
duration 20
count 1
]
edge
[
source 1574
target 1712
duration 480
count 10
]
edge
[
source 1574
target 1714
duration 20
count 1
]
edge
[
source 1574
target 1719
duration 40
count 1
]
edge
[
source 1574
target 1720
duration 60
count 2
]
edge
[
source 1574
target 1722
duration 20
count 1
]
edge
[
source 1574
target 1727
duration 1280
count 30
]
edge
[
source 1574
target 1731
duration 580
count 17
]
edge
[
source 1574
target 1707
duration 2580
count 54
]
edge
[
source 1574
target 1737
duration 20
count 1
]
edge
[
source 1574
target 1738
duration 100
count 4
]
edge
[
source 1574
target 1741
duration 40
count 2
]
edge
[
source 1574
target 1744
duration 840
count 19
]
edge
[
source 1574
target 1489
duration 20
count 1
]
edge
[
source 1574
target 1746
duration 40
count 1
]
edge
[
source 1574
target 1748
duration 20
count 1
]
edge
[
source 1574
target 1594
duration 200
count 8
]
edge
[
source 1574
target 1912
duration 20
count 1
]
edge
[
source 1578
target 1426
duration 200
count 8
]
edge
[
source 1578
target 1427
duration 40
count 2
]
edge
[
source 1578
target 1428
duration 20
count 1
]
edge
[
source 1578
target 1429
duration 220
count 10
]
edge
[
source 1578
target 1431
duration 60
count 3
]
edge
[
source 1578
target 1434
duration 60
count 3
]
edge
[
source 1578
target 1437
duration 240
count 10
]
edge
[
source 1578
target 1439
duration 160
count 5
]
edge
[
source 1578
target 1824
duration 40
count 1
]
edge
[
source 1578
target 1441
duration 140
count 7
]
edge
[
source 1578
target 1443
duration 140
count 7
]
edge
[
source 1578
target 1585
duration 300
count 11
]
edge
[
source 1578
target 1592
duration 320
count 14
]
edge
[
source 1578
target 1465
duration 160
count 7
]
edge
[
source 1578
target 1471
duration 280
count 12
]
edge
[
source 1578
target 1475
duration 120
count 5
]
edge
[
source 1578
target 1480
duration 40
count 2
]
edge
[
source 1578
target 1482
duration 260
count 10
]
edge
[
source 1578
target 1486
duration 40
count 2
]
edge
[
source 1578
target 1489
duration 200
count 8
]
edge
[
source 1578
target 1435
duration 840
count 27
]
edge
[
source 1579
target 1922
duration 60
count 2
]
edge
[
source 1579
target 1795
duration 100
count 5
]
edge
[
source 1579
target 1859
duration 80
count 4
]
edge
[
source 1579
target 1479
duration 20
count 1
]
edge
[
source 1579
target 1800
duration 20
count 1
]
edge
[
source 1579
target 1801
duration 20
count 1
]
edge
[
source 1579
target 1675
duration 20
count 1
]
edge
[
source 1579
target 1730
duration 40
count 1
]
edge
[
source 1579
target 1809
duration 40
count 1
]
edge
[
source 1579
target 1428
duration 40
count 2
]
edge
[
source 1579
target 1685
duration 1380
count 36
]
edge
[
source 1579
target 1625
duration 1040
count 19
]
edge
[
source 1579
target 1796
duration 40
count 1
]
edge
[
source 1579
target 1434
duration 20
count 1
]
edge
[
source 1579
target 1710
duration 40
count 2
]
edge
[
source 1579
target 1822
duration 180
count 7
]
edge
[
source 1579
target 1697
duration 80
count 3
]
edge
[
source 1579
target 1698
duration 80
count 3
]
edge
[
source 1579
target 1649
duration 20
count 1
]
edge
[
source 1579
target 1704
duration 100
count 5
]
edge
[
source 1579
target 1833
duration 160
count 7
]
edge
[
source 1579
target 1707
duration 1300
count 41
]
edge
[
source 1579
target 1580
duration 440
count 14
]
edge
[
source 1579
target 1709
duration 100
count 3
]
edge
[
source 1579
target 1838
duration 1060
count 24
]
edge
[
source 1579
target 1757
duration 20
count 1
]
edge
[
source 1579
target 1712
duration 280
count 9
]
edge
[
source 1579
target 1714
duration 60
count 3
]
edge
[
source 1579
target 1843
duration 580
count 20
]
edge
[
source 1579
target 1719
duration 120
count 5
]
edge
[
source 1579
target 1720
duration 80
count 4
]
edge
[
source 1579
target 1594
duration 520
count 19
]
edge
[
source 1579
target 1851
duration 100
count 3
]
edge
[
source 1579
target 1711
duration 20
count 1
]
edge
[
source 1579
target 1727
duration 180
count 8
]
edge
[
source 1579
target 1858
duration 60
count 2
]
edge
[
source 1579
target 1731
duration 260
count 5
]
edge
[
source 1579
target 1761
duration 40
count 2
]
edge
[
source 1579
target 1737
duration 80
count 4
]
edge
[
source 1579
target 1738
duration 20
count 1
]
edge
[
source 1579
target 1613
duration 60
count 3
]
edge
[
source 1579
target 1744
duration 20
count 1
]
edge
[
source 1579
target 1748
duration 120
count 3
]
edge
[
source 1579
target 1749
duration 20
count 1
]
edge
[
source 1579
target 1751
duration 20
count 1
]
edge
[
source 1579
target 1520
duration 20
count 1
]
edge
[
source 1579
target 1700
duration 1000
count 40
]
edge
[
source 1579
target 1498
duration 40
count 2
]
edge
[
source 1579
target 1628
duration 120
count 4
]
edge
[
source 1579
target 1722
duration 40
count 2
]
edge
[
source 1579
target 1759
duration 20
count 1
]
edge
[
source 1579
target 1887
duration 20
count 1
]
edge
[
source 1579
target 1889
duration 140
count 7
]
edge
[
source 1579
target 1763
duration 160
count 4
]
edge
[
source 1579
target 1702
duration 20
count 1
]
edge
[
source 1579
target 1674
duration 20
count 1
]
edge
[
source 1579
target 1768
duration 180
count 8
]
edge
[
source 1579
target 1643
duration 600
count 15
]
edge
[
source 1579
target 1902
duration 1960
count 35
]
edge
[
source 1579
target 1647
duration 20
count 1
]
edge
[
source 1579
target 1648
duration 140
count 6
]
edge
[
source 1579
target 1708
duration 180
count 4
]
edge
[
source 1579
target 1778
duration 20
count 1
]
edge
[
source 1579
target 1907
duration 160
count 5
]
edge
[
source 1579
target 1780
duration 140
count 6
]
edge
[
source 1579
target 1909
duration 100
count 4
]
edge
[
source 1579
target 1782
duration 640
count 19
]
edge
[
source 1579
target 1684
duration 20
count 1
]
edge
[
source 1579
target 1855
duration 100
count 2
]
edge
[
source 1579
target 1789
duration 20
count 1
]
edge
[
source 1579
target 1765
duration 20
count 1
]
edge
[
source 1580
target 1707
duration 200
count 9
]
edge
[
source 1580
target 1685
duration 1960
count 41
]
edge
[
source 1580
target 1822
duration 80
count 3
]
edge
[
source 1580
target 1709
duration 60
count 3
]
edge
[
source 1580
target 1712
duration 200
count 4
]
edge
[
source 1580
target 1714
duration 60
count 2
]
edge
[
source 1580
target 1843
duration 20
count 1
]
edge
[
source 1580
target 1594
duration 760
count 20
]
edge
[
source 1580
target 1851
duration 20
count 1
]
edge
[
source 1580
target 1854
duration 20
count 1
]
edge
[
source 1580
target 1727
duration 180
count 8
]
edge
[
source 1580
target 1731
duration 820
count 25
]
edge
[
source 1580
target 1744
duration 120
count 5
]
edge
[
source 1580
target 1748
duration 20
count 1
]
edge
[
source 1580
target 1700
duration 540
count 14
]
edge
[
source 1580
target 1765
duration 20
count 1
]
edge
[
source 1580
target 1516
duration 20
count 1
]
edge
[
source 1580
target 1907
duration 40
count 2
]
edge
[
source 1580
target 1912
duration 20
count 1
]
edge
[
source 1585
target 1664
duration 20
count 1
]
edge
[
source 1585
target 1795
duration 20
count 1
]
edge
[
source 1585
target 1673
duration 20
count 1
]
edge
[
source 1585
target 1426
duration 340
count 11
]
edge
[
source 1585
target 1427
duration 80
count 4
]
edge
[
source 1585
target 1428
duration 360
count 13
]
edge
[
source 1585
target 1429
duration 100
count 5
]
edge
[
source 1585
target 1431
duration 40
count 2
]
edge
[
source 1585
target 1434
duration 20
count 1
]
edge
[
source 1585
target 1435
duration 160
count 5
]
edge
[
source 1585
target 1437
duration 600
count 20
]
edge
[
source 1585
target 1439
duration 100
count 5
]
edge
[
source 1585
target 1824
duration 40
count 2
]
edge
[
source 1585
target 1441
duration 60
count 2
]
edge
[
source 1585
target 1443
duration 100
count 5
]
edge
[
source 1585
target 1835
duration 20
count 1
]
edge
[
source 1585
target 1837
duration 40
count 1
]
edge
[
source 1585
target 1457
duration 400
count 15
]
edge
[
source 1585
target 1458
duration 40
count 2
]
edge
[
source 1585
target 1592
duration 240
count 11
]
edge
[
source 1585
target 1465
duration 40
count 2
]
edge
[
source 1585
target 1695
duration 40
count 2
]
edge
[
source 1585
target 1468
duration 20
count 1
]
edge
[
source 1585
target 1866
duration 20
count 1
]
edge
[
source 1585
target 1471
duration 120
count 6
]
edge
[
source 1585
target 1475
duration 60
count 3
]
edge
[
source 1585
target 1477
duration 40
count 2
]
edge
[
source 1585
target 1480
duration 120
count 5
]
edge
[
source 1585
target 1482
duration 840
count 27
]
edge
[
source 1585
target 1483
duration 60
count 3
]
edge
[
source 1585
target 1486
duration 640
count 26
]
edge
[
source 1585
target 1489
duration 20
count 1
]
edge
[
source 1585
target 1750
duration 160
count 7
]
edge
[
source 1585
target 1751
duration 80
count 3
]
edge
[
source 1585
target 1498
duration 840
count 33
]
edge
[
source 1585
target 1502
duration 20
count 1
]
edge
[
source 1585
target 1503
duration 60
count 2
]
edge
[
source 1585
target 1887
duration 20
count 1
]
edge
[
source 1585
target 1763
duration 40
count 1
]
edge
[
source 1585
target 1765
duration 20
count 1
]
edge
[
source 1585
target 1768
duration 20
count 1
]
edge
[
source 1585
target 1898
duration 20
count 1
]
edge
[
source 1585
target 1520
duration 300
count 13
]
edge
[
source 1585
target 1910
duration 20
count 1
]
edge
[
source 1585
target 1656
duration 20
count 1
]
edge
[
source 1585
target 1684
duration 80
count 4
]
edge
[
source 1585
target 1532
duration 100
count 1
]
edge
[
source 1585
target 1533
duration 200
count 3
]
edge
[
source 1592
target 1664
duration 40
count 2
]
edge
[
source 1592
target 1665
duration 20
count 1
]
edge
[
source 1592
target 1666
duration 40
count 2
]
edge
[
source 1592
target 1451
duration 20
count 1
]
edge
[
source 1592
target 1675
duration 20
count 1
]
edge
[
source 1592
target 1426
duration 300
count 13
]
edge
[
source 1592
target 1427
duration 600
count 18
]
edge
[
source 1592
target 1428
duration 100
count 5
]
edge
[
source 1592
target 1429
duration 60
count 3
]
edge
[
source 1592
target 1431
duration 180
count 8
]
edge
[
source 1592
target 1434
duration 40
count 2
]
edge
[
source 1592
target 1437
duration 120
count 5
]
edge
[
source 1592
target 1439
duration 80
count 3
]
edge
[
source 1592
target 1824
duration 160
count 4
]
edge
[
source 1592
target 1441
duration 200
count 7
]
edge
[
source 1592
target 1698
duration 20
count 1
]
edge
[
source 1592
target 1443
duration 80
count 3
]
edge
[
source 1592
target 1457
duration 40
count 2
]
edge
[
source 1592
target 1628
duration 20
count 1
]
edge
[
source 1592
target 1835
duration 40
count 2
]
edge
[
source 1592
target 1452
duration 660
count 24
]
edge
[
source 1592
target 1837
duration 200
count 7
]
edge
[
source 1592
target 1821
duration 20
count 1
]
edge
[
source 1592
target 1458
duration 900
count 31
]
edge
[
source 1592
target 1847
duration 20
count 1
]
edge
[
source 1592
target 1465
duration 120
count 6
]
edge
[
source 1592
target 1594
duration 20
count 1
]
edge
[
source 1592
target 1468
duration 400
count 14
]
edge
[
source 1592
target 1866
duration 20
count 1
]
edge
[
source 1592
target 1471
duration 360
count 15
]
edge
[
source 1592
target 1730
duration 40
count 2
]
edge
[
source 1592
target 1475
duration 500
count 11
]
edge
[
source 1592
target 1477
duration 360
count 13
]
edge
[
source 1592
target 1697
duration 20
count 1
]
edge
[
source 1592
target 1480
duration 20
count 1
]
edge
[
source 1592
target 1482
duration 880
count 28
]
edge
[
source 1592
target 1613
duration 20
count 1
]
edge
[
source 1592
target 1486
duration 820
count 32
]
edge
[
source 1592
target 1489
duration 60
count 3
]
edge
[
source 1592
target 1493
duration 20
count 1
]
edge
[
source 1592
target 1750
duration 40
count 2
]
edge
[
source 1592
target 1751
duration 220
count 9
]
edge
[
source 1592
target 1498
duration 20
count 1
]
edge
[
source 1592
target 1435
duration 1240
count 37
]
edge
[
source 1592
target 1501
duration 60
count 2
]
edge
[
source 1592
target 1503
duration 40
count 1
]
edge
[
source 1592
target 1765
duration 80
count 3
]
edge
[
source 1592
target 1767
duration 40
count 1
]
edge
[
source 1592
target 1912
duration 20
count 1
]
edge
[
source 1592
target 1782
duration 20
count 1
]
edge
[
source 1592
target 1656
duration 100
count 4
]
edge
[
source 1592
target 1684
duration 20
count 1
]
edge
[
source 1592
target 1916
duration 20
count 1
]
edge
[
source 1592
target 1533
duration 20
count 1
]
edge
[
source 1592
target 1790
duration 20
count 1
]
edge
[
source 1594
target 1664
duration 20
count 1
]
edge
[
source 1594
target 1707
duration 480
count 22
]
edge
[
source 1594
target 1837
duration 20
count 1
]
edge
[
source 1594
target 1799
duration 40
count 2
]
edge
[
source 1594
target 1801
duration 100
count 4
]
edge
[
source 1594
target 1738
duration 20
count 1
]
edge
[
source 1594
target 1688
duration 40
count 2
]
edge
[
source 1594
target 1859
duration 240
count 10
]
edge
[
source 1594
target 1685
duration 320
count 11
]
edge
[
source 1594
target 1625
duration 60
count 2
]
edge
[
source 1594
target 1710
duration 20
count 1
]
edge
[
source 1594
target 1822
duration 60
count 3
]
edge
[
source 1594
target 1696
duration 20
count 1
]
edge
[
source 1594
target 1723
duration 20
count 1
]
edge
[
source 1594
target 1439
duration 20
count 1
]
edge
[
source 1594
target 1649
duration 20
count 1
]
edge
[
source 1594
target 1704
duration 20
count 1
]
edge
[
source 1594
target 1833
duration 720
count 27
]
edge
[
source 1594
target 1709
duration 220
count 8
]
edge
[
source 1594
target 1838
duration 220
count 9
]
edge
[
source 1594
target 1757
duration 160
count 7
]
edge
[
source 1594
target 1712
duration 260
count 10
]
edge
[
source 1594
target 1714
duration 40
count 2
]
edge
[
source 1594
target 1843
duration 80
count 4
]
edge
[
source 1594
target 1719
duration 20
count 1
]
edge
[
source 1594
target 1720
duration 140
count 7
]
edge
[
source 1594
target 1722
duration 20
count 1
]
edge
[
source 1594
target 1851
duration 140
count 7
]
edge
[
source 1594
target 1468
duration 60
count 3
]
edge
[
source 1594
target 1890
duration 100
count 3
]
edge
[
source 1594
target 1727
duration 600
count 19
]
edge
[
source 1594
target 1730
duration 60
count 3
]
edge
[
source 1594
target 1731
duration 560
count 12
]
edge
[
source 1594
target 1732
duration 300
count 8
]
edge
[
source 1594
target 1861
duration 20
count 1
]
edge
[
source 1594
target 1479
duration 20
count 1
]
edge
[
source 1594
target 1673
duration 20
count 1
]
edge
[
source 1594
target 1737
duration 160
count 6
]
edge
[
source 1594
target 1866
duration 60
count 1
]
edge
[
source 1594
target 1483
duration 80
count 2
]
edge
[
source 1594
target 1613
duration 120
count 6
]
edge
[
source 1594
target 1695
duration 20
count 1
]
edge
[
source 1594
target 1744
duration 840
count 32
]
edge
[
source 1594
target 1748
duration 60
count 3
]
edge
[
source 1594
target 1749
duration 20
count 1
]
edge
[
source 1594
target 1751
duration 20
count 1
]
edge
[
source 1594
target 1700
duration 380
count 13
]
edge
[
source 1594
target 1628
duration 1420
count 29
]
edge
[
source 1594
target 1501
duration 20
count 1
]
edge
[
source 1594
target 1503
duration 20
count 1
]
edge
[
source 1594
target 1887
duration 120
count 4
]
edge
[
source 1594
target 1763
duration 40
count 2
]
edge
[
source 1594
target 1768
duration 80
count 4
]
edge
[
source 1594
target 1641
duration 20
count 1
]
edge
[
source 1594
target 1779
duration 20
count 1
]
edge
[
source 1594
target 1516
duration 80
count 3
]
edge
[
source 1594
target 1902
duration 100
count 5
]
edge
[
source 1594
target 1708
duration 380
count 10
]
edge
[
source 1594
target 1778
duration 240
count 10
]
edge
[
source 1594
target 1780
duration 1480
count 45
]
edge
[
source 1594
target 1909
duration 680
count 26
]
edge
[
source 1594
target 1911
duration 40
count 2
]
edge
[
source 1594
target 1656
duration 40
count 2
]
edge
[
source 1594
target 1453
duration 20
count 1
]
edge
[
source 1594
target 1795
duration 60
count 3
]
edge
[
source 1594
target 1855
duration 60
count 2
]
edge
[
source 1594
target 1916
duration 180
count 6
]
edge
[
source 1601
target 1888
duration 80
count 4
]
edge
[
source 1601
target 1857
duration 100
count 2
]
edge
[
source 1601
target 1835
duration 40
count 2
]
edge
[
source 1601
target 1885
duration 40
count 2
]
edge
[
source 1601
target 1831
duration 40
count 2
]
edge
[
source 1601
target 1865
duration 60
count 3
]
edge
[
source 1601
target 1866
duration 180
count 4
]
edge
[
source 1601
target 1895
duration 20
count 1
]
edge
[
source 1601
target 1836
duration 180
count 7
]
edge
[
source 1601
target 1805
duration 120
count 2
]
edge
[
source 1601
target 1807
duration 40
count 2
]
edge
[
source 1601
target 1521
duration 40
count 2
]
edge
[
source 1601
target 1910
duration 60
count 2
]
edge
[
source 1601
target 1880
duration 20
count 1
]
edge
[
source 1601
target 1759
duration 20
count 1
]
edge
[
source 1601
target 1818
duration 40
count 2
]
edge
[
source 1601
target 1819
duration 40
count 2
]
edge
[
source 1601
target 1632
duration 20
count 1
]
edge
[
source 1601
target 1802
duration 20
count 1
]
edge
[
source 1601
target 1630
duration 80
count 4
]
edge
[
source 1603
target 1922
duration 2760
count 74
]
edge
[
source 1603
target 1797
duration 20
count 1
]
edge
[
source 1603
target 1670
duration 20
count 1
]
edge
[
source 1603
target 1522
duration 20
count 1
]
edge
[
source 1603
target 1711
duration 20
count 1
]
edge
[
source 1603
target 1852
duration 440
count 14
]
edge
[
source 1603
target 1604
duration 820
count 22
]
edge
[
source 1603
target 1606
duration 1040
count 31
]
edge
[
source 1603
target 1613
duration 120
count 4
]
edge
[
source 1603
target 1743
duration 20
count 1
]
edge
[
source 1603
target 1616
duration 420
count 12
]
edge
[
source 1603
target 1617
duration 240
count 8
]
edge
[
source 1603
target 1618
duration 20
count 1
]
edge
[
source 1603
target 1625
duration 560
count 17
]
edge
[
source 1603
target 1628
duration 120
count 5
]
edge
[
source 1603
target 1761
duration 20
count 1
]
edge
[
source 1603
target 1641
duration 60
count 3
]
edge
[
source 1603
target 1643
duration 820
count 20
]
edge
[
source 1603
target 1902
duration 540
count 15
]
edge
[
source 1603
target 1647
duration 340
count 10
]
edge
[
source 1603
target 1648
duration 900
count 28
]
edge
[
source 1603
target 1649
duration 420
count 15
]
edge
[
source 1603
target 1906
duration 340
count 11
]
edge
[
source 1603
target 1907
duration 160
count 8
]
edge
[
source 1603
target 1911
duration 680
count 12
]
edge
[
source 1603
target 1913
duration 400
count 12
]
edge
[
source 1603
target 1916
duration 40
count 2
]
edge
[
source 1603
target 1917
duration 80
count 4
]
edge
[
source 1603
target 1919
duration 620
count 21
]
edge
[
source 1604
target 1922
duration 1420
count 38
]
edge
[
source 1604
target 1670
duration 120
count 4
]
edge
[
source 1604
target 1675
duration 20
count 1
]
edge
[
source 1604
target 1684
duration 20
count 1
]
edge
[
source 1604
target 1688
duration 80
count 4
]
edge
[
source 1604
target 1837
duration 20
count 1
]
edge
[
source 1604
target 1779
duration 20
count 1
]
edge
[
source 1604
target 1852
duration 380
count 15
]
edge
[
source 1604
target 1606
duration 280
count 12
]
edge
[
source 1604
target 1783
duration 20
count 1
]
edge
[
source 1604
target 1613
duration 60
count 3
]
edge
[
source 1604
target 1616
duration 280
count 10
]
edge
[
source 1604
target 1617
duration 440
count 15
]
edge
[
source 1604
target 1625
duration 460
count 20
]
edge
[
source 1604
target 1498
duration 20
count 1
]
edge
[
source 1604
target 1628
duration 260
count 9
]
edge
[
source 1604
target 1503
duration 20
count 1
]
edge
[
source 1604
target 1761
duration 20
count 1
]
edge
[
source 1604
target 1459
duration 20
count 1
]
edge
[
source 1604
target 1765
duration 20
count 1
]
edge
[
source 1604
target 1641
duration 300
count 7
]
edge
[
source 1604
target 1643
duration 120
count 6
]
edge
[
source 1604
target 1902
duration 520
count 17
]
edge
[
source 1604
target 1647
duration 600
count 17
]
edge
[
source 1604
target 1648
duration 340
count 13
]
edge
[
source 1604
target 1649
duration 220
count 8
]
edge
[
source 1604
target 1906
duration 260
count 9
]
edge
[
source 1604
target 1907
duration 40
count 2
]
edge
[
source 1604
target 1911
duration 440
count 18
]
edge
[
source 1604
target 1913
duration 420
count 16
]
edge
[
source 1604
target 1663
duration 20
count 1
]
edge
[
source 1604
target 1916
duration 240
count 10
]
edge
[
source 1604
target 1917
duration 180
count 7
]
edge
[
source 1604
target 1919
duration 160
count 6
]
edge
[
source 1606
target 1664
duration 20
count 1
]
edge
[
source 1606
target 1922
duration 280
count 11
]
edge
[
source 1606
target 1797
duration 20
count 1
]
edge
[
source 1606
target 1670
duration 20
count 1
]
edge
[
source 1606
target 1675
duration 40
count 2
]
edge
[
source 1606
target 1637
duration 20
count 1
]
edge
[
source 1606
target 1680
duration 20
count 1
]
edge
[
source 1606
target 1682
duration 20
count 1
]
edge
[
source 1606
target 1688
duration 20
count 1
]
edge
[
source 1606
target 1697
duration 20
count 1
]
edge
[
source 1606
target 1468
duration 20
count 1
]
edge
[
source 1606
target 1451
duration 40
count 2
]
edge
[
source 1606
target 1759
duration 20
count 1
]
edge
[
source 1606
target 1852
duration 340
count 14
]
edge
[
source 1606
target 1609
duration 40
count 1
]
edge
[
source 1606
target 1783
duration 20
count 1
]
edge
[
source 1606
target 1613
duration 420
count 18
]
edge
[
source 1606
target 1616
duration 1900
count 56
]
edge
[
source 1606
target 1617
duration 520
count 20
]
edge
[
source 1606
target 1618
duration 20
count 1
]
edge
[
source 1606
target 1751
duration 40
count 2
]
edge
[
source 1606
target 1625
duration 860
count 26
]
edge
[
source 1606
target 1628
duration 360
count 16
]
edge
[
source 1606
target 1757
duration 40
count 2
]
edge
[
source 1606
target 1503
duration 20
count 1
]
edge
[
source 1606
target 1744
duration 20
count 1
]
edge
[
source 1606
target 1765
duration 20
count 1
]
edge
[
source 1606
target 1641
duration 200
count 9
]
edge
[
source 1606
target 1643
duration 180
count 8
]
edge
[
source 1606
target 1902
duration 800
count 21
]
edge
[
source 1606
target 1647
duration 420
count 15
]
edge
[
source 1606
target 1648
duration 260
count 12
]
edge
[
source 1606
target 1649
duration 300
count 14
]
edge
[
source 1606
target 1906
duration 4340
count 82
]
edge
[
source 1606
target 1907
duration 360
count 12
]
edge
[
source 1606
target 1653
duration 20
count 1
]
edge
[
source 1606
target 1911
duration 260
count 12
]
edge
[
source 1606
target 1913
duration 340
count 13
]
edge
[
source 1606
target 1663
duration 20
count 1
]
edge
[
source 1606
target 1916
duration 560
count 12
]
edge
[
source 1606
target 1917
duration 240
count 11
]
edge
[
source 1606
target 1919
duration 300
count 10
]
edge
[
source 1609
target 1643
duration 20
count 1
]
edge
[
source 1609
target 1647
duration 1420
count 22
]
edge
[
source 1609
target 1617
duration 20
count 1
]
edge
[
source 1609
target 1906
duration 40
count 2
]
edge
[
source 1609
target 1911
duration 20
count 1
]
edge
[
source 1609
target 1852
duration 180
count 4
]
edge
[
source 1609
target 1917
duration 3100
count 56
]
edge
[
source 1613
target 1664
duration 40
count 2
]
edge
[
source 1613
target 1665
duration 160
count 4
]
edge
[
source 1613
target 1922
duration 160
count 7
]
edge
[
source 1613
target 1795
duration 20
count 1
]
edge
[
source 1613
target 1799
duration 20
count 1
]
edge
[
source 1613
target 1673
duration 420
count 11
]
edge
[
source 1613
target 1675
duration 20
count 1
]
edge
[
source 1613
target 1666
duration 20
count 1
]
edge
[
source 1613
target 1859
duration 20
count 1
]
edge
[
source 1613
target 1838
duration 20
count 1
]
edge
[
source 1613
target 1732
duration 80
count 4
]
edge
[
source 1613
target 1437
duration 20
count 1
]
edge
[
source 1613
target 1889
duration 20
count 1
]
edge
[
source 1613
target 1520
duration 40
count 2
]
edge
[
source 1613
target 1698
duration 100
count 2
]
edge
[
source 1613
target 1443
duration 20
count 1
]
edge
[
source 1613
target 1704
duration 40
count 2
]
edge
[
source 1613
target 1833
duration 40
count 2
]
edge
[
source 1613
target 1909
duration 20
count 1
]
edge
[
source 1613
target 1708
duration 2920
count 44
]
edge
[
source 1613
target 1778
duration 40
count 1
]
edge
[
source 1613
target 1710
duration 120
count 5
]
edge
[
source 1613
target 1457
duration 20
count 1
]
edge
[
source 1613
target 1458
duration 20
count 1
]
edge
[
source 1613
target 1718
duration 20
count 1
]
edge
[
source 1613
target 1719
duration 40
count 2
]
edge
[
source 1613
target 1720
duration 40
count 2
]
edge
[
source 1613
target 1908
duration 240
count 9
]
edge
[
source 1613
target 1851
duration 60
count 3
]
edge
[
source 1613
target 1852
duration 180
count 9
]
edge
[
source 1613
target 1451
duration 20
count 1
]
edge
[
source 1613
target 1792
duration 40
count 2
]
edge
[
source 1613
target 1855
duration 120
count 4
]
edge
[
source 1613
target 1700
duration 1040
count 19
]
edge
[
source 1613
target 1656
duration 100
count 5
]
edge
[
source 1613
target 1801
duration 20
count 1
]
edge
[
source 1613
target 1453
duration 20
count 1
]
edge
[
source 1613
target 1468
duration 20
count 1
]
edge
[
source 1613
target 1616
duration 160
count 6
]
edge
[
source 1613
target 1617
duration 180
count 7
]
edge
[
source 1613
target 1618
duration 20
count 1
]
edge
[
source 1613
target 1749
duration 80
count 2
]
edge
[
source 1613
target 1495
duration 20
count 1
]
edge
[
source 1613
target 1752
duration 20
count 1
]
edge
[
source 1613
target 1625
duration 820
count 34
]
edge
[
source 1613
target 1628
duration 2740
count 80
]
edge
[
source 1613
target 1757
duration 60
count 3
]
edge
[
source 1613
target 1759
duration 40
count 1
]
edge
[
source 1613
target 1761
duration 140
count 5
]
edge
[
source 1613
target 1887
duration 380
count 15
]
edge
[
source 1613
target 1763
duration 20
count 1
]
edge
[
source 1613
target 1637
duration 20
count 1
]
edge
[
source 1613
target 1767
duration 2160
count 25
]
edge
[
source 1613
target 1641
duration 60
count 2
]
edge
[
source 1613
target 1643
duration 100
count 3
]
edge
[
source 1613
target 1516
duration 20
count 1
]
edge
[
source 1613
target 1902
duration 1100
count 35
]
edge
[
source 1613
target 1647
duration 1000
count 14
]
edge
[
source 1613
target 1648
duration 240
count 10
]
edge
[
source 1613
target 1649
duration 120
count 6
]
edge
[
source 1613
target 1906
duration 160
count 8
]
edge
[
source 1613
target 1907
duration 5240
count 119
]
edge
[
source 1613
target 1780
duration 1040
count 23
]
edge
[
source 1613
target 1525
duration 40
count 2
]
edge
[
source 1613
target 1911
duration 1280
count 35
]
edge
[
source 1613
target 1912
duration 20
count 1
]
edge
[
source 1613
target 1913
duration 60
count 3
]
edge
[
source 1613
target 1663
duration 20
count 1
]
edge
[
source 1613
target 1916
duration 460
count 21
]
edge
[
source 1613
target 1917
duration 20
count 1
]
edge
[
source 1613
target 1790
duration 20
count 1
]
edge
[
source 1613
target 1919
duration 380
count 8
]
edge
[
source 1616
target 1664
duration 20
count 1
]
edge
[
source 1616
target 1922
duration 160
count 6
]
edge
[
source 1616
target 1674
duration 20
count 1
]
edge
[
source 1616
target 1680
duration 20
count 1
]
edge
[
source 1616
target 1684
duration 20
count 1
]
edge
[
source 1616
target 1452
duration 20
count 1
]
edge
[
source 1616
target 1522
duration 20
count 1
]
edge
[
source 1616
target 1852
duration 260
count 8
]
edge
[
source 1616
target 1617
duration 160
count 5
]
edge
[
source 1616
target 1625
duration 400
count 11
]
edge
[
source 1616
target 1498
duration 20
count 1
]
edge
[
source 1616
target 1628
duration 80
count 4
]
edge
[
source 1616
target 1765
duration 40
count 2
]
edge
[
source 1616
target 1641
duration 180
count 5
]
edge
[
source 1616
target 1643
duration 140
count 7
]
edge
[
source 1616
target 1902
duration 380
count 12
]
edge
[
source 1616
target 1647
duration 240
count 9
]
edge
[
source 1616
target 1648
duration 440
count 17
]
edge
[
source 1616
target 1649
duration 140
count 6
]
edge
[
source 1616
target 1906
duration 400
count 17
]
edge
[
source 1616
target 1907
duration 340
count 8
]
edge
[
source 1616
target 1908
duration 20
count 1
]
edge
[
source 1616
target 1911
duration 80
count 4
]
edge
[
source 1616
target 1913
duration 160
count 8
]
edge
[
source 1616
target 1663
duration 20
count 1
]
edge
[
source 1616
target 1916
duration 60
count 3
]
edge
[
source 1616
target 1917
duration 240
count 8
]
edge
[
source 1616
target 1919
duration 660
count 22
]
edge
[
source 1617
target 1920
duration 20
count 1
]
edge
[
source 1617
target 1922
duration 540
count 16
]
edge
[
source 1617
target 1670
duration 40
count 2
]
edge
[
source 1617
target 1468
duration 20
count 1
]
edge
[
source 1617
target 1858
duration 780
count 25
]
edge
[
source 1617
target 1859
duration 40
count 1
]
edge
[
source 1617
target 1684
duration 200
count 7
]
edge
[
source 1617
target 1822
duration 20
count 1
]
edge
[
source 1617
target 1695
duration 40
count 2
]
edge
[
source 1617
target 1704
duration 80
count 1
]
edge
[
source 1617
target 1833
duration 20
count 1
]
edge
[
source 1617
target 1451
duration 20
count 1
]
edge
[
source 1617
target 1708
duration 20
count 1
]
edge
[
source 1617
target 1837
duration 20
count 1
]
edge
[
source 1617
target 1838
duration 40
count 2
]
edge
[
source 1617
target 1843
duration 20
count 1
]
edge
[
source 1617
target 1718
duration 80
count 2
]
edge
[
source 1617
target 1722
duration 20
count 1
]
edge
[
source 1617
target 1851
duration 20
count 1
]
edge
[
source 1617
target 1852
duration 1120
count 27
]
edge
[
source 1617
target 1855
duration 60
count 3
]
edge
[
source 1617
target 1730
duration 20
count 1
]
edge
[
source 1617
target 1861
duration 20
count 1
]
edge
[
source 1617
target 1889
duration 40
count 2
]
edge
[
source 1617
target 1486
duration 20
count 1
]
edge
[
source 1617
target 1745
duration 20
count 1
]
edge
[
source 1617
target 1749
duration 1160
count 27
]
edge
[
source 1617
target 1625
duration 760
count 17
]
edge
[
source 1617
target 1498
duration 40
count 2
]
edge
[
source 1617
target 1628
duration 180
count 8
]
edge
[
source 1617
target 1757
duration 20
count 1
]
edge
[
source 1617
target 1887
duration 20
count 1
]
edge
[
source 1617
target 1761
duration 580
count 21
]
edge
[
source 1617
target 1789
duration 20
count 1
]
edge
[
source 1617
target 1766
duration 40
count 2
]
edge
[
source 1617
target 1767
duration 20
count 1
]
edge
[
source 1617
target 1768
duration 20
count 1
]
edge
[
source 1617
target 1641
duration 5480
count 121
]
edge
[
source 1617
target 1898
duration 3460
count 64
]
edge
[
source 1617
target 1643
duration 240
count 6
]
edge
[
source 1617
target 1902
duration 560
count 20
]
edge
[
source 1617
target 1647
duration 1060
count 23
]
edge
[
source 1617
target 1648
duration 220
count 6
]
edge
[
source 1617
target 1649
duration 120
count 5
]
edge
[
source 1617
target 1906
duration 160
count 7
]
edge
[
source 1617
target 1907
duration 1480
count 37
]
edge
[
source 1617
target 1909
duration 20
count 1
]
edge
[
source 1617
target 1911
duration 1380
count 39
]
edge
[
source 1617
target 1656
duration 20
count 1
]
edge
[
source 1617
target 1913
duration 280
count 6
]
edge
[
source 1617
target 1916
duration 220
count 10
]
edge
[
source 1617
target 1917
duration 180
count 8
]
edge
[
source 1617
target 1790
duration 20
count 1
]
edge
[
source 1617
target 1919
duration 100
count 5
]
edge
[
source 1618
target 1920
duration 20
count 1
]
edge
[
source 1618
target 1797
duration 80
count 2
]
edge
[
source 1618
target 1798
duration 20
count 1
]
edge
[
source 1618
target 1815
duration 2320
count 36
]
edge
[
source 1618
target 1647
duration 80
count 3
]
edge
[
source 1618
target 1705
duration 20
count 1
]
edge
[
source 1618
target 1452
duration 20
count 1
]
edge
[
source 1618
target 1837
duration 380
count 10
]
edge
[
source 1618
target 1908
duration 20
count 1
]
edge
[
source 1618
target 1525
duration 160
count 6
]
edge
[
source 1618
target 1730
duration 600
count 13
]
edge
[
source 1618
target 1495
duration 20
count 1
]
edge
[
source 1618
target 1753
duration 20
count 1
]
edge
[
source 1618
target 1500
duration 160
count 7
]
edge
[
source 1618
target 1503
duration 40
count 2
]
edge
[
source 1618
target 1504
duration 140
count 4
]
edge
[
source 1618
target 1519
duration 80
count 3
]
edge
[
source 1618
target 1649
duration 40
count 2
]
edge
[
source 1618
target 1524
duration 60
count 3
]
edge
[
source 1618
target 1653
duration 260
count 8
]
edge
[
source 1618
target 1532
duration 360
count 12
]
edge
[
source 1618
target 1533
duration 80
count 3
]
edge
[
source 1625
target 1920
duration 40
count 2
]
edge
[
source 1625
target 1665
duration 20
count 1
]
edge
[
source 1625
target 1922
duration 1380
count 43
]
edge
[
source 1625
target 1795
duration 20
count 1
]
edge
[
source 1625
target 1670
duration 20
count 1
]
edge
[
source 1625
target 1799
duration 20
count 1
]
edge
[
source 1625
target 1673
duration 320
count 11
]
edge
[
source 1625
target 1675
duration 60
count 3
]
edge
[
source 1625
target 1666
duration 20
count 1
]
edge
[
source 1625
target 1680
duration 20
count 1
]
edge
[
source 1625
target 1684
duration 20
count 1
]
edge
[
source 1625
target 1822
duration 80
count 2
]
edge
[
source 1625
target 1520
duration 20
count 1
]
edge
[
source 1625
target 1704
duration 80
count 2
]
edge
[
source 1625
target 1833
duration 180
count 7
]
edge
[
source 1625
target 1708
duration 260
count 9
]
edge
[
source 1625
target 1778
duration 20
count 1
]
edge
[
source 1625
target 1838
duration 60
count 3
]
edge
[
source 1625
target 1757
duration 20
count 1
]
edge
[
source 1625
target 1457
duration 40
count 1
]
edge
[
source 1625
target 1843
duration 60
count 3
]
edge
[
source 1625
target 1718
duration 1520
count 28
]
edge
[
source 1625
target 1719
duration 20
count 1
]
edge
[
source 1625
target 1908
duration 140
count 5
]
edge
[
source 1625
target 1664
duration 40
count 2
]
edge
[
source 1625
target 1468
duration 20
count 1
]
edge
[
source 1625
target 1852
duration 980
count 27
]
edge
[
source 1625
target 1855
duration 120
count 4
]
edge
[
source 1625
target 1857
duration 20
count 1
]
edge
[
source 1625
target 1730
duration 40
count 2
]
edge
[
source 1625
target 1889
duration 20
count 1
]
edge
[
source 1625
target 1656
duration 80
count 3
]
edge
[
source 1625
target 1748
duration 20
count 1
]
edge
[
source 1625
target 1909
duration 60
count 2
]
edge
[
source 1625
target 1751
duration 20
count 1
]
edge
[
source 1625
target 1533
duration 20
count 1
]
edge
[
source 1625
target 1628
duration 2840
count 95
]
edge
[
source 1625
target 1887
duration 20
count 1
]
edge
[
source 1625
target 1761
duration 40
count 2
]
edge
[
source 1625
target 1890
duration 100
count 2
]
edge
[
source 1625
target 1789
duration 40
count 1
]
edge
[
source 1625
target 1764
duration 20
count 1
]
edge
[
source 1625
target 1768
duration 540
count 15
]
edge
[
source 1625
target 1641
duration 1540
count 30
]
edge
[
source 1625
target 1898
duration 80
count 3
]
edge
[
source 1625
target 1643
duration 180
count 8
]
edge
[
source 1625
target 1902
duration 3080
count 75
]
edge
[
source 1625
target 1647
duration 300
count 12
]
edge
[
source 1625
target 1648
duration 400
count 14
]
edge
[
source 1625
target 1649
duration 500
count 22
]
edge
[
source 1625
target 1906
duration 480
count 14
]
edge
[
source 1625
target 1907
duration 720
count 23
]
edge
[
source 1625
target 1780
duration 20
count 1
]
edge
[
source 1625
target 1525
duration 20
count 1
]
edge
[
source 1625
target 1782
duration 60
count 2
]
edge
[
source 1625
target 1911
duration 1180
count 34
]
edge
[
source 1625
target 1912
duration 20
count 1
]
edge
[
source 1625
target 1913
duration 120
count 6
]
edge
[
source 1625
target 1916
duration 440
count 13
]
edge
[
source 1625
target 1917
duration 480
count 15
]
edge
[
source 1625
target 1790
duration 440
count 12
]
edge
[
source 1625
target 1919
duration 360
count 14
]
edge
[
source 1628
target 1920
duration 20
count 1
]
edge
[
source 1628
target 1665
duration 20
count 1
]
edge
[
source 1628
target 1922
duration 320
count 13
]
edge
[
source 1628
target 1675
duration 20
count 1
]
edge
[
source 1628
target 1799
duration 120
count 4
]
edge
[
source 1628
target 1673
duration 160
count 6
]
edge
[
source 1628
target 1687
duration 40
count 2
]
edge
[
source 1628
target 1859
duration 40
count 2
]
edge
[
source 1628
target 1753
duration 20
count 1
]
edge
[
source 1628
target 1732
duration 60
count 3
]
edge
[
source 1628
target 1680
duration 20
count 1
]
edge
[
source 1628
target 1822
duration 40
count 2
]
edge
[
source 1628
target 1698
duration 20
count 1
]
edge
[
source 1628
target 1722
duration 40
count 2
]
edge
[
source 1628
target 1858
duration 40
count 1
]
edge
[
source 1628
target 1704
duration 60
count 3
]
edge
[
source 1628
target 1833
duration 20
count 1
]
edge
[
source 1628
target 1493
duration 20
count 1
]
edge
[
source 1628
target 1708
duration 200
count 7
]
edge
[
source 1628
target 1458
duration 20
count 1
]
edge
[
source 1628
target 1710
duration 100
count 5
]
edge
[
source 1628
target 1843
duration 20
count 1
]
edge
[
source 1628
target 1461
duration 20
count 1
]
edge
[
source 1628
target 1718
duration 20
count 1
]
edge
[
source 1628
target 1908
duration 60
count 2
]
edge
[
source 1628
target 1851
duration 220
count 6
]
edge
[
source 1628
target 1852
duration 1180
count 25
]
edge
[
source 1628
target 1532
duration 20
count 1
]
edge
[
source 1628
target 1855
duration 560
count 13
]
edge
[
source 1628
target 1700
duration 40
count 2
]
edge
[
source 1628
target 1730
duration 20
count 1
]
edge
[
source 1628
target 1861
duration 120
count 3
]
edge
[
source 1628
target 1889
duration 20
count 1
]
edge
[
source 1628
target 1661
duration 40
count 2
]
edge
[
source 1628
target 1749
duration 20
count 1
]
edge
[
source 1628
target 1757
duration 140
count 5
]
edge
[
source 1628
target 1887
duration 120
count 5
]
edge
[
source 1628
target 1761
duration 60
count 2
]
edge
[
source 1628
target 1890
duration 160
count 6
]
edge
[
source 1628
target 1767
duration 80
count 3
]
edge
[
source 1628
target 1768
duration 40
count 2
]
edge
[
source 1628
target 1641
duration 80
count 4
]
edge
[
source 1628
target 1643
duration 80
count 4
]
edge
[
source 1628
target 1516
duration 60
count 3
]
edge
[
source 1628
target 1902
duration 720
count 24
]
edge
[
source 1628
target 1647
duration 640
count 19
]
edge
[
source 1628
target 1648
duration 280
count 11
]
edge
[
source 1628
target 1649
duration 980
count 38
]
edge
[
source 1628
target 1906
duration 300
count 9
]
edge
[
source 1628
target 1907
duration 700
count 26
]
edge
[
source 1628
target 1780
duration 20
count 1
]
edge
[
source 1628
target 1782
duration 80
count 3
]
edge
[
source 1628
target 1911
duration 1060
count 30
]
edge
[
source 1628
target 1656
duration 140
count 5
]
edge
[
source 1628
target 1913
duration 120
count 4
]
edge
[
source 1628
target 1916
duration 1560
count 39
]
edge
[
source 1628
target 1789
duration 20
count 1
]
edge
[
source 1628
target 1790
duration 20
count 1
]
edge
[
source 1628
target 1919
duration 620
count 18
]
edge
[
source 1630
target 1796
duration 20
count 1
]
edge
[
source 1630
target 1802
duration 40
count 1
]
edge
[
source 1630
target 1805
duration 40
count 2
]
edge
[
source 1630
target 1807
duration 20
count 1
]
edge
[
source 1630
target 1818
duration 80
count 3
]
edge
[
source 1630
target 1821
duration 20
count 1
]
edge
[
source 1630
target 1836
duration 320
count 11
]
edge
[
source 1630
target 1885
duration 540
count 10
]
edge
[
source 1630
target 1847
duration 60
count 2
]
edge
[
source 1630
target 1866
duration 20
count 1
]
edge
[
source 1630
target 1857
duration 20
count 1
]
edge
[
source 1630
target 1475
duration 20
count 1
]
edge
[
source 1630
target 1480
duration 140
count 4
]
edge
[
source 1630
target 1482
duration 20
count 1
]
edge
[
source 1630
target 1880
duration 60
count 3
]
edge
[
source 1630
target 1757
duration 20
count 1
]
edge
[
source 1630
target 1888
duration 20
count 1
]
edge
[
source 1630
target 1895
duration 20
count 1
]
edge
[
source 1630
target 1521
duration 120
count 5
]
edge
[
source 1630
target 1910
duration 20
count 1
]
edge
[
source 1630
target 1632
duration 60
count 3
]
edge
[
source 1632
target 1796
duration 20
count 1
]
edge
[
source 1632
target 1802
duration 60
count 3
]
edge
[
source 1632
target 1807
duration 40
count 1
]
edge
[
source 1632
target 1434
duration 40
count 1
]
edge
[
source 1632
target 1819
duration 100
count 4
]
edge
[
source 1632
target 1821
duration 160
count 5
]
edge
[
source 1632
target 1831
duration 60
count 3
]
edge
[
source 1632
target 1835
duration 180
count 8
]
edge
[
source 1632
target 1836
duration 80
count 4
]
edge
[
source 1632
target 1885
duration 100
count 3
]
edge
[
source 1632
target 1847
duration 260
count 10
]
edge
[
source 1632
target 1857
duration 140
count 6
]
edge
[
source 1632
target 1480
duration 20
count 1
]
edge
[
source 1632
target 1866
duration 80
count 3
]
edge
[
source 1632
target 1880
duration 20
count 1
]
edge
[
source 1632
target 1757
duration 20
count 1
]
edge
[
source 1632
target 1888
duration 20
count 1
]
edge
[
source 1632
target 1895
duration 200
count 8
]
edge
[
source 1632
target 1774
duration 60
count 1
]
edge
[
source 1632
target 1521
duration 180
count 6
]
edge
[
source 1632
target 1910
duration 420
count 14
]
edge
[
source 1637
target 1665
duration 20
count 1
]
edge
[
source 1637
target 1668
duration 160
count 5
]
edge
[
source 1637
target 1798
duration 20
count 1
]
edge
[
source 1637
target 1495
duration 340
count 13
]
edge
[
source 1637
target 1437
duration 80
count 2
]
edge
[
source 1637
target 1697
duration 160
count 7
]
edge
[
source 1637
target 1698
duration 20
count 1
]
edge
[
source 1637
target 1443
duration 200
count 6
]
edge
[
source 1637
target 1451
duration 2080
count 42
]
edge
[
source 1637
target 1452
duration 120
count 3
]
edge
[
source 1637
target 1453
duration 100
count 3
]
edge
[
source 1637
target 1457
duration 140
count 6
]
edge
[
source 1637
target 1458
duration 1180
count 26
]
edge
[
source 1637
target 1459
duration 60
count 3
]
edge
[
source 1637
target 1461
duration 160
count 5
]
edge
[
source 1637
target 1468
duration 80
count 4
]
edge
[
source 1637
target 1730
duration 20
count 1
]
edge
[
source 1637
target 1477
duration 20
count 1
]
edge
[
source 1637
target 1479
duration 40
count 2
]
edge
[
source 1637
target 1483
duration 100
count 3
]
edge
[
source 1637
target 1744
duration 20
count 1
]
edge
[
source 1637
target 1493
duration 1160
count 39
]
edge
[
source 1637
target 1751
duration 40
count 2
]
edge
[
source 1637
target 1498
duration 160
count 3
]
edge
[
source 1637
target 1501
duration 3200
count 55
]
edge
[
source 1637
target 1502
duration 1480
count 36
]
edge
[
source 1637
target 1516
duration 180
count 6
]
edge
[
source 1637
target 1902
duration 20
count 1
]
edge
[
source 1637
target 1520
duration 100
count 4
]
edge
[
source 1637
target 1522
duration 280
count 8
]
edge
[
source 1637
target 1907
duration 20
count 1
]
edge
[
source 1641
target 1920
duration 60
count 3
]
edge
[
source 1641
target 1664
duration 40
count 1
]
edge
[
source 1641
target 1922
duration 1020
count 25
]
edge
[
source 1641
target 1799
duration 40
count 2
]
edge
[
source 1641
target 1789
duration 20
count 1
]
edge
[
source 1641
target 1859
duration 40
count 2
]
edge
[
source 1641
target 1684
duration 260
count 8
]
edge
[
source 1641
target 1778
duration 40
count 1
]
edge
[
source 1641
target 1695
duration 100
count 2
]
edge
[
source 1641
target 1704
duration 20
count 1
]
edge
[
source 1641
target 1708
duration 20
count 1
]
edge
[
source 1641
target 1650
duration 20
count 1
]
edge
[
source 1641
target 1718
duration 1620
count 33
]
edge
[
source 1641
target 1852
duration 720
count 20
]
edge
[
source 1641
target 1855
duration 20
count 1
]
edge
[
source 1641
target 1861
duration 80
count 4
]
edge
[
source 1641
target 1749
duration 60
count 3
]
edge
[
source 1641
target 1752
duration 20
count 1
]
edge
[
source 1641
target 1757
duration 40
count 2
]
edge
[
source 1641
target 1887
duration 60
count 3
]
edge
[
source 1641
target 1889
duration 40
count 2
]
edge
[
source 1641
target 1890
duration 20
count 1
]
edge
[
source 1641
target 1763
duration 20
count 1
]
edge
[
source 1641
target 1764
duration 20
count 1
]
edge
[
source 1641
target 1765
duration 20
count 1
]
edge
[
source 1641
target 1768
duration 120
count 6
]
edge
[
source 1641
target 1898
duration 1000
count 31
]
edge
[
source 1641
target 1643
duration 120
count 3
]
edge
[
source 1641
target 1902
duration 340
count 8
]
edge
[
source 1641
target 1647
duration 320
count 10
]
edge
[
source 1641
target 1648
duration 180
count 7
]
edge
[
source 1641
target 1649
duration 20
count 1
]
edge
[
source 1641
target 1906
duration 340
count 9
]
edge
[
source 1641
target 1907
duration 260
count 11
]
edge
[
source 1641
target 1780
duration 40
count 2
]
edge
[
source 1641
target 1909
duration 20
count 1
]
edge
[
source 1641
target 1911
duration 560
count 17
]
edge
[
source 1641
target 1913
duration 280
count 11
]
edge
[
source 1641
target 1919
duration 220
count 8
]
edge
[
source 1641
target 1916
duration 200
count 9
]
edge
[
source 1641
target 1917
duration 260
count 9
]
edge
[
source 1641
target 1790
duration 120
count 5
]
edge
[
source 1641
target 1663
duration 20
count 1
]
edge
[
source 1643
target 1922
duration 120
count 4
]
edge
[
source 1643
target 1799
duration 20
count 1
]
edge
[
source 1643
target 1684
duration 20
count 1
]
edge
[
source 1643
target 1822
duration 60
count 2
]
edge
[
source 1643
target 1696
duration 20
count 1
]
edge
[
source 1643
target 1700
duration 40
count 2
]
edge
[
source 1643
target 1704
duration 40
count 2
]
edge
[
source 1643
target 1778
duration 20
count 1
]
edge
[
source 1643
target 1838
duration 20
count 1
]
edge
[
source 1643
target 1843
duration 640
count 21
]
edge
[
source 1643
target 1718
duration 80
count 3
]
edge
[
source 1643
target 1719
duration 80
count 4
]
edge
[
source 1643
target 1851
duration 60
count 1
]
edge
[
source 1643
target 1852
duration 340
count 13
]
edge
[
source 1643
target 1858
duration 80
count 3
]
edge
[
source 1643
target 1861
duration 60
count 1
]
edge
[
source 1643
target 1761
duration 20
count 1
]
edge
[
source 1643
target 1748
duration 20
count 1
]
edge
[
source 1643
target 1749
duration 60
count 3
]
edge
[
source 1643
target 1887
duration 20
count 1
]
edge
[
source 1643
target 1889
duration 280
count 9
]
edge
[
source 1643
target 1890
duration 60
count 2
]
edge
[
source 1643
target 1768
duration 20
count 1
]
edge
[
source 1643
target 1898
duration 60
count 3
]
edge
[
source 1643
target 1902
duration 200
count 9
]
edge
[
source 1643
target 1647
duration 420
count 14
]
edge
[
source 1643
target 1648
duration 2220
count 69
]
edge
[
source 1643
target 1649
duration 100
count 5
]
edge
[
source 1643
target 1906
duration 80
count 4
]
edge
[
source 1643
target 1907
duration 160
count 4
]
edge
[
source 1643
target 1782
duration 280
count 7
]
edge
[
source 1643
target 1911
duration 200
count 8
]
edge
[
source 1643
target 1913
duration 20
count 1
]
edge
[
source 1643
target 1916
duration 480
count 19
]
edge
[
source 1643
target 1917
duration 60
count 3
]
edge
[
source 1643
target 1790
duration 20
count 1
]
edge
[
source 1643
target 1919
duration 200
count 6
]
edge
[
source 1647
target 1922
duration 560
count 14
]
edge
[
source 1647
target 1797
duration 60
count 2
]
edge
[
source 1647
target 1670
duration 40
count 2
]
edge
[
source 1647
target 1680
duration 20
count 1
]
edge
[
source 1647
target 1688
duration 20
count 1
]
edge
[
source 1647
target 1500
duration 40
count 2
]
edge
[
source 1647
target 1707
duration 20
count 1
]
edge
[
source 1647
target 1837
duration 120
count 5
]
edge
[
source 1647
target 1852
duration 580
count 18
]
edge
[
source 1647
target 1902
duration 740
count 16
]
edge
[
source 1647
target 1916
duration 620
count 20
]
edge
[
source 1647
target 1648
duration 340
count 9
]
edge
[
source 1647
target 1649
duration 520
count 19
]
edge
[
source 1647
target 1906
duration 200
count 7
]
edge
[
source 1647
target 1907
duration 600
count 19
]
edge
[
source 1647
target 1525
duration 20
count 1
]
edge
[
source 1647
target 1911
duration 2160
count 48
]
edge
[
source 1647
target 1912
duration 20
count 1
]
edge
[
source 1647
target 1913
duration 300
count 6
]
edge
[
source 1647
target 1532
duration 40
count 2
]
edge
[
source 1647
target 1917
duration 1900
count 42
]
edge
[
source 1647
target 1919
duration 460
count 15
]
edge
[
source 1648
target 1920
duration 40
count 1
]
edge
[
source 1648
target 1922
duration 260
count 12
]
edge
[
source 1648
target 1796
duration 20
count 1
]
edge
[
source 1648
target 1673
duration 20
count 1
]
edge
[
source 1648
target 1674
duration 20
count 1
]
edge
[
source 1648
target 1666
duration 20
count 1
]
edge
[
source 1648
target 1688
duration 20
count 1
]
edge
[
source 1648
target 1822
duration 80
count 3
]
edge
[
source 1648
target 1861
duration 640
count 16
]
edge
[
source 1648
target 1704
duration 20
count 1
]
edge
[
source 1648
target 1708
duration 20
count 1
]
edge
[
source 1648
target 1843
duration 1180
count 28
]
edge
[
source 1648
target 1718
duration 240
count 9
]
edge
[
source 1648
target 1719
duration 560
count 18
]
edge
[
source 1648
target 1720
duration 40
count 2
]
edge
[
source 1648
target 1908
duration 20
count 1
]
edge
[
source 1648
target 1851
duration 20
count 1
]
edge
[
source 1648
target 1852
duration 180
count 6
]
edge
[
source 1648
target 1858
duration 140
count 6
]
edge
[
source 1648
target 1477
duration 20
count 1
]
edge
[
source 1648
target 1889
duration 1500
count 38
]
edge
[
source 1648
target 1749
duration 80
count 1
]
edge
[
source 1648
target 1498
duration 20
count 1
]
edge
[
source 1648
target 1887
duration 40
count 2
]
edge
[
source 1648
target 1761
duration 20
count 1
]
edge
[
source 1648
target 1890
duration 20
count 1
]
edge
[
source 1648
target 1902
duration 120
count 6
]
edge
[
source 1648
target 1520
duration 20
count 1
]
edge
[
source 1648
target 1649
duration 100
count 5
]
edge
[
source 1648
target 1906
duration 260
count 10
]
edge
[
source 1648
target 1907
duration 180
count 8
]
edge
[
source 1648
target 1780
duration 20
count 1
]
edge
[
source 1648
target 1782
duration 260
count 10
]
edge
[
source 1648
target 1911
duration 160
count 7
]
edge
[
source 1648
target 1913
duration 40
count 2
]
edge
[
source 1648
target 1916
duration 40
count 2
]
edge
[
source 1648
target 1917
duration 20
count 1
]
edge
[
source 1648
target 1790
duration 20
count 1
]
edge
[
source 1648
target 1919
duration 60
count 3
]
edge
[
source 1649
target 1664
duration 20
count 1
]
edge
[
source 1649
target 1922
duration 300
count 12
]
edge
[
source 1649
target 1797
duration 20
count 1
]
edge
[
source 1649
target 1673
duration 160
count 6
]
edge
[
source 1649
target 1675
duration 20
count 1
]
edge
[
source 1649
target 1837
duration 20
count 1
]
edge
[
source 1649
target 1457
duration 20
count 1
]
edge
[
source 1649
target 1458
duration 20
count 1
]
edge
[
source 1649
target 1852
duration 1000
count 18
]
edge
[
source 1649
target 1751
duration 20
count 1
]
edge
[
source 1649
target 1500
duration 20
count 1
]
edge
[
source 1649
target 1502
duration 20
count 1
]
edge
[
source 1649
target 1765
duration 20
count 1
]
edge
[
source 1649
target 1902
duration 380
count 17
]
edge
[
source 1649
target 1906
duration 1800
count 59
]
edge
[
source 1649
target 1907
duration 160
count 6
]
edge
[
source 1649
target 1908
duration 80
count 3
]
edge
[
source 1649
target 1525
duration 40
count 2
]
edge
[
source 1649
target 1911
duration 260
count 11
]
edge
[
source 1649
target 1656
duration 100
count 3
]
edge
[
source 1649
target 1913
duration 100
count 5
]
edge
[
source 1649
target 1916
duration 140
count 7
]
edge
[
source 1649
target 1917
duration 120
count 2
]
edge
[
source 1649
target 1919
duration 120
count 5
]
edge
[
source 1650
target 1673
duration 20
count 1
]
edge
[
source 1650
target 1427
duration 20
count 1
]
edge
[
source 1650
target 1443
duration 20
count 1
]
edge
[
source 1650
target 1702
duration 280
count 9
]
edge
[
source 1650
target 1704
duration 360
count 10
]
edge
[
source 1650
target 1706
duration 140
count 6
]
edge
[
source 1650
target 1708
duration 260
count 10
]
edge
[
source 1650
target 1709
duration 180
count 4
]
edge
[
source 1650
target 1710
duration 40
count 2
]
edge
[
source 1650
target 1713
duration 520
count 18
]
edge
[
source 1650
target 1715
duration 260
count 6
]
edge
[
source 1650
target 1718
duration 580
count 21
]
edge
[
source 1650
target 1851
duration 1060
count 30
]
edge
[
source 1650
target 1854
duration 80
count 3
]
edge
[
source 1650
target 1855
duration 340
count 12
]
edge
[
source 1650
target 1858
duration 160
count 8
]
edge
[
source 1650
target 1732
duration 200
count 6
]
edge
[
source 1650
target 1861
duration 180
count 6
]
edge
[
source 1650
target 1863
duration 40
count 2
]
edge
[
source 1650
target 1739
duration 120
count 6
]
edge
[
source 1650
target 1743
duration 200
count 7
]
edge
[
source 1650
target 1872
duration 560
count 17
]
edge
[
source 1650
target 1746
duration 20
count 1
]
edge
[
source 1650
target 1877
duration 60
count 3
]
edge
[
source 1650
target 1883
duration 100
count 5
]
edge
[
source 1650
target 1887
duration 260
count 10
]
edge
[
source 1650
target 1889
duration 240
count 11
]
edge
[
source 1650
target 1890
duration 500
count 18
]
edge
[
source 1650
target 1897
duration 200
count 6
]
edge
[
source 1650
target 1898
duration 500
count 20
]
edge
[
source 1650
target 1749
duration 300
count 11
]
edge
[
source 1653
target 1668
duration 80
count 1
]
edge
[
source 1653
target 1797
duration 40
count 2
]
edge
[
source 1653
target 1681
duration 20
count 1
]
edge
[
source 1653
target 1815
duration 20
count 1
]
edge
[
source 1653
target 1697
duration 20
count 1
]
edge
[
source 1653
target 1705
duration 100
count 5
]
edge
[
source 1653
target 1451
duration 20
count 1
]
edge
[
source 1653
target 1837
duration 200
count 9
]
edge
[
source 1653
target 1801
duration 20
count 1
]
edge
[
source 1653
target 1908
duration 20
count 1
]
edge
[
source 1653
target 1852
duration 260
count 4
]
edge
[
source 1653
target 1674
duration 20
count 1
]
edge
[
source 1653
target 1730
duration 120
count 6
]
edge
[
source 1653
target 1745
duration 80
count 1
]
edge
[
source 1653
target 1500
duration 240
count 5
]
edge
[
source 1653
target 1503
duration 140
count 4
]
edge
[
source 1653
target 1504
duration 400
count 11
]
edge
[
source 1653
target 1765
duration 20
count 1
]
edge
[
source 1653
target 1519
duration 80
count 3
]
edge
[
source 1653
target 1524
duration 60
count 3
]
edge
[
source 1653
target 1525
duration 60
count 3
]
edge
[
source 1653
target 1528
duration 100
count 5
]
edge
[
source 1653
target 1532
duration 120
count 6
]
edge
[
source 1653
target 1533
duration 660
count 12
]
edge
[
source 1656
target 1664
duration 140
count 7
]
edge
[
source 1656
target 1665
duration 120
count 6
]
edge
[
source 1656
target 1666
duration 60
count 2
]
edge
[
source 1656
target 1670
duration 240
count 9
]
edge
[
source 1656
target 1799
duration 20
count 1
]
edge
[
source 1656
target 1673
duration 940
count 37
]
edge
[
source 1656
target 1674
duration 1000
count 34
]
edge
[
source 1656
target 1675
duration 2420
count 62
]
edge
[
source 1656
target 1730
duration 20
count 1
]
edge
[
source 1656
target 1680
duration 160
count 7
]
edge
[
source 1656
target 1426
duration 820
count 32
]
edge
[
source 1656
target 1428
duration 580
count 16
]
edge
[
source 1656
target 1687
duration 60
count 3
]
edge
[
source 1656
target 1688
duration 100
count 5
]
edge
[
source 1656
target 1695
duration 80
count 3
]
edge
[
source 1656
target 1696
duration 60
count 3
]
edge
[
source 1656
target 1697
duration 420
count 12
]
edge
[
source 1656
target 1698
duration 60
count 3
]
edge
[
source 1656
target 1443
duration 20
count 1
]
edge
[
source 1656
target 1798
duration 20
count 1
]
edge
[
source 1656
target 1457
duration 40
count 2
]
edge
[
source 1656
target 1493
duration 20
count 1
]
edge
[
source 1656
target 1451
duration 20
count 1
]
edge
[
source 1656
target 1452
duration 20
count 1
]
edge
[
source 1656
target 1837
duration 40
count 2
]
edge
[
source 1656
target 1458
duration 80
count 1
]
edge
[
source 1656
target 1465
duration 60
count 2
]
edge
[
source 1656
target 1722
duration 20
count 1
]
edge
[
source 1656
target 1851
duration 40
count 1
]
edge
[
source 1656
target 1852
duration 20
count 1
]
edge
[
source 1656
target 1482
duration 60
count 2
]
edge
[
source 1656
target 1855
duration 20
count 1
]
edge
[
source 1656
target 1920
duration 140
count 4
]
edge
[
source 1656
target 1477
duration 20
count 1
]
edge
[
source 1656
target 1480
duration 40
count 2
]
edge
[
source 1656
target 1866
duration 20
count 1
]
edge
[
source 1656
target 1483
duration 20
count 1
]
edge
[
source 1656
target 1486
duration 280
count 9
]
edge
[
source 1656
target 1745
duration 140
count 7
]
edge
[
source 1656
target 1748
duration 20
count 1
]
edge
[
source 1656
target 1749
duration 20
count 1
]
edge
[
source 1656
target 1495
duration 20
count 1
]
edge
[
source 1656
target 1752
duration 80
count 3
]
edge
[
source 1656
target 1498
duration 140
count 5
]
edge
[
source 1656
target 1500
duration 20
count 1
]
edge
[
source 1656
target 1757
duration 20
count 1
]
edge
[
source 1656
target 1761
duration 20
count 1
]
edge
[
source 1656
target 1890
duration 20
count 1
]
edge
[
source 1656
target 1765
duration 1000
count 31
]
edge
[
source 1656
target 1766
duration 20
count 1
]
edge
[
source 1656
target 1468
duration 900
count 30
]
edge
[
source 1656
target 1895
duration 20
count 1
]
edge
[
source 1656
target 1516
duration 60
count 3
]
edge
[
source 1656
target 1789
duration 20
count 1
]
edge
[
source 1656
target 1520
duration 340
count 15
]
edge
[
source 1656
target 1779
duration 100
count 3
]
edge
[
source 1656
target 1908
duration 1820
count 50
]
edge
[
source 1656
target 1714
duration 40
count 1
]
edge
[
source 1656
target 1684
duration 140
count 6
]
edge
[
source 1656
target 1661
duration 100
count 5
]
edge
[
source 1656
target 1663
duration 80
count 3
]
edge
[
source 1661
target 1664
duration 540
count 20
]
edge
[
source 1661
target 1920
duration 20
count 1
]
edge
[
source 1661
target 1666
duration 660
count 25
]
edge
[
source 1661
target 1670
duration 300
count 9
]
edge
[
source 1661
target 1665
duration 100
count 5
]
edge
[
source 1661
target 1673
duration 840
count 31
]
edge
[
source 1661
target 1674
duration 180
count 7
]
edge
[
source 1661
target 1675
duration 700
count 20
]
edge
[
source 1661
target 1680
duration 1240
count 17
]
edge
[
source 1661
target 1681
duration 140
count 4
]
edge
[
source 1661
target 1682
duration 1720
count 44
]
edge
[
source 1661
target 1684
duration 320
count 14
]
edge
[
source 1661
target 1687
duration 160
count 7
]
edge
[
source 1661
target 1688
duration 360
count 14
]
edge
[
source 1661
target 1695
duration 1720
count 63
]
edge
[
source 1661
target 1696
duration 1200
count 23
]
edge
[
source 1661
target 1697
duration 240
count 11
]
edge
[
source 1661
target 1698
duration 300
count 11
]
edge
[
source 1661
target 1459
duration 20
count 1
]
edge
[
source 1661
target 1908
duration 140
count 6
]
edge
[
source 1661
target 1745
duration 140
count 7
]
edge
[
source 1661
target 1765
duration 40
count 2
]
edge
[
source 1661
target 1902
duration 20
count 1
]
edge
[
source 1661
target 1779
duration 1180
count 37
]
edge
[
source 1661
target 1912
duration 100
count 5
]
edge
[
source 1661
target 1913
duration 20
count 1
]
edge
[
source 1661
target 1663
duration 80
count 3
]
edge
[
source 1663
target 1920
duration 1000
count 38
]
edge
[
source 1663
target 1665
duration 6240
count 129
]
edge
[
source 1663
target 1666
duration 540
count 13
]
edge
[
source 1663
target 1670
duration 360
count 7
]
edge
[
source 1663
target 1673
duration 240
count 10
]
edge
[
source 1663
target 1674
duration 980
count 17
]
edge
[
source 1663
target 1675
duration 360
count 11
]
edge
[
source 1663
target 1680
duration 200
count 9
]
edge
[
source 1663
target 1681
duration 380
count 10
]
edge
[
source 1663
target 1682
duration 280
count 9
]
edge
[
source 1663
target 1684
duration 1040
count 40
]
edge
[
source 1663
target 1687
duration 720
count 19
]
edge
[
source 1663
target 1688
duration 140
count 6
]
edge
[
source 1663
target 1695
duration 1280
count 26
]
edge
[
source 1663
target 1696
duration 100
count 4
]
edge
[
source 1663
target 1697
duration 320
count 12
]
edge
[
source 1663
target 1698
duration 3840
count 90
]
edge
[
source 1663
target 1451
duration 20
count 1
]
edge
[
source 1663
target 1457
duration 20
count 1
]
edge
[
source 1663
target 1907
duration 40
count 2
]
edge
[
source 1663
target 1664
duration 80
count 4
]
edge
[
source 1663
target 1759
duration 60
count 2
]
edge
[
source 1663
target 1483
duration 20
count 1
]
edge
[
source 1663
target 1745
duration 840
count 34
]
edge
[
source 1663
target 1493
duration 20
count 1
]
edge
[
source 1663
target 1495
duration 40
count 2
]
edge
[
source 1663
target 1516
duration 20
count 1
]
edge
[
source 1663
target 1503
duration 40
count 1
]
edge
[
source 1663
target 1760
duration 60
count 2
]
edge
[
source 1663
target 1765
duration 200
count 6
]
edge
[
source 1663
target 1772
duration 20
count 1
]
edge
[
source 1663
target 1902
duration 40
count 1
]
edge
[
source 1663
target 1775
duration 20
count 1
]
edge
[
source 1663
target 1779
duration 1100
count 43
]
edge
[
source 1663
target 1908
duration 180
count 8
]
edge
[
source 1663
target 1912
duration 80
count 4
]
edge
[
source 1663
target 1787
duration 20
count 1
]
edge
[
source 1664
target 1920
duration 40
count 2
]
edge
[
source 1664
target 1665
duration 600
count 21
]
edge
[
source 1664
target 1666
duration 820
count 30
]
edge
[
source 1664
target 1835
duration 20
count 1
]
edge
[
source 1664
target 1670
duration 160
count 7
]
edge
[
source 1664
target 1673
duration 60
count 3
]
edge
[
source 1664
target 1674
duration 140
count 6
]
edge
[
source 1664
target 1675
duration 2760
count 64
]
edge
[
source 1664
target 1922
duration 40
count 2
]
edge
[
source 1664
target 1680
duration 280
count 12
]
edge
[
source 1664
target 1681
duration 80
count 3
]
edge
[
source 1664
target 1426
duration 20
count 1
]
edge
[
source 1664
target 1684
duration 380
count 17
]
edge
[
source 1664
target 1687
duration 300
count 13
]
edge
[
source 1664
target 1688
duration 660
count 29
]
edge
[
source 1664
target 1434
duration 40
count 2
]
edge
[
source 1664
target 1843
duration 40
count 2
]
edge
[
source 1664
target 1821
duration 40
count 2
]
edge
[
source 1664
target 1695
duration 500
count 15
]
edge
[
source 1664
target 1696
duration 260
count 12
]
edge
[
source 1664
target 1697
duration 860
count 30
]
edge
[
source 1664
target 1698
duration 520
count 22
]
edge
[
source 1664
target 1751
duration 120
count 4
]
edge
[
source 1664
target 1780
duration 20
count 1
]
edge
[
source 1664
target 1452
duration 800
count 25
]
edge
[
source 1664
target 1837
duration 2080
count 26
]
edge
[
source 1664
target 1437
duration 60
count 3
]
edge
[
source 1664
target 1457
duration 80
count 4
]
edge
[
source 1664
target 1458
duration 640
count 21
]
edge
[
source 1664
target 1907
duration 20
count 1
]
edge
[
source 1664
target 1461
duration 40
count 2
]
edge
[
source 1664
target 1719
duration 20
count 1
]
edge
[
source 1664
target 1908
duration 540
count 22
]
edge
[
source 1664
target 1851
duration 20
count 1
]
edge
[
source 1664
target 1468
duration 80
count 3
]
edge
[
source 1664
target 1857
duration 20
count 1
]
edge
[
source 1664
target 1730
duration 60
count 3
]
edge
[
source 1664
target 1477
duration 20
count 1
]
edge
[
source 1664
target 1480
duration 20
count 1
]
edge
[
source 1664
target 1482
duration 60
count 2
]
edge
[
source 1664
target 1890
duration 20
count 1
]
edge
[
source 1664
target 1486
duration 20
count 1
]
edge
[
source 1664
target 1745
duration 740
count 28
]
edge
[
source 1664
target 1493
duration 20
count 1
]
edge
[
source 1664
target 1465
duration 20
count 1
]
edge
[
source 1664
target 1498
duration 80
count 4
]
edge
[
source 1664
target 1501
duration 40
count 2
]
edge
[
source 1664
target 1502
duration 60
count 3
]
edge
[
source 1664
target 1503
duration 40
count 2
]
edge
[
source 1664
target 1887
duration 20
count 1
]
edge
[
source 1664
target 1708
duration 40
count 1
]
edge
[
source 1664
target 1765
duration 1520
count 32
]
edge
[
source 1664
target 1495
duration 20
count 1
]
edge
[
source 1664
target 1516
duration 20
count 1
]
edge
[
source 1664
target 1682
duration 260
count 10
]
edge
[
source 1664
target 1902
duration 40
count 2
]
edge
[
source 1664
target 1533
duration 60
count 2
]
edge
[
source 1664
target 1520
duration 60
count 3
]
edge
[
source 1664
target 1779
duration 100
count 4
]
edge
[
source 1664
target 1912
duration 460
count 19
]
edge
[
source 1664
target 1782
duration 20
count 1
]
edge
[
source 1664
target 1428
duration 20
count 1
]
edge
[
source 1664
target 1532
duration 960
count 31
]
edge
[
source 1664
target 1919
duration 40
count 2
]
edge
[
source 1665
target 1666
duration 4560
count 64
]
edge
[
source 1665
target 1670
duration 260
count 9
]
edge
[
source 1665
target 1673
duration 80
count 3
]
edge
[
source 1665
target 1674
duration 100
count 5
]
edge
[
source 1665
target 1675
duration 180
count 6
]
edge
[
source 1665
target 1680
duration 160
count 7
]
edge
[
source 1665
target 1681
duration 500
count 14
]
edge
[
source 1665
target 1682
duration 580
count 13
]
edge
[
source 1665
target 1684
duration 340
count 15
]
edge
[
source 1665
target 1687
duration 220
count 8
]
edge
[
source 1665
target 1688
duration 180
count 9
]
edge
[
source 1665
target 1695
duration 1300
count 23
]
edge
[
source 1665
target 1696
duration 140
count 6
]
edge
[
source 1665
target 1697
duration 1760
count 48
]
edge
[
source 1665
target 1698
duration 2580
count 66
]
edge
[
source 1665
target 1704
duration 100
count 2
]
edge
[
source 1665
target 1705
duration 20
count 1
]
edge
[
source 1665
target 1727
duration 20
count 1
]
edge
[
source 1665
target 1730
duration 120
count 4
]
edge
[
source 1665
target 1731
duration 20
count 1
]
edge
[
source 1665
target 1744
duration 40
count 1
]
edge
[
source 1665
target 1745
duration 840
count 29
]
edge
[
source 1665
target 1749
duration 20
count 1
]
edge
[
source 1665
target 1751
duration 100
count 2
]
edge
[
source 1665
target 1757
duration 40
count 2
]
edge
[
source 1665
target 1759
duration 20
count 1
]
edge
[
source 1665
target 1761
duration 60
count 3
]
edge
[
source 1665
target 1765
duration 160
count 8
]
edge
[
source 1665
target 1767
duration 40
count 2
]
edge
[
source 1665
target 1768
duration 20
count 1
]
edge
[
source 1665
target 1779
duration 1240
count 40
]
edge
[
source 1665
target 1783
duration 40
count 1
]
edge
[
source 1665
target 1797
duration 60
count 3
]
edge
[
source 1665
target 1799
duration 40
count 2
]
edge
[
source 1665
target 1821
duration 160
count 5
]
edge
[
source 1665
target 1835
duration 40
count 2
]
edge
[
source 1665
target 1837
duration 80
count 4
]
edge
[
source 1665
target 1847
duration 20
count 1
]
edge
[
source 1665
target 1857
duration 60
count 2
]
edge
[
source 1665
target 1859
duration 20
count 1
]
edge
[
source 1665
target 1866
duration 40
count 2
]
edge
[
source 1665
target 1887
duration 100
count 1
]
edge
[
source 1665
target 1898
duration 20
count 1
]
edge
[
source 1665
target 1908
duration 220
count 8
]
edge
[
source 1665
target 1912
duration 1680
count 35
]
edge
[
source 1665
target 1916
duration 40
count 1
]
edge
[
source 1665
target 1920
duration 1680
count 42
]
edge
[
source 1665
target 1426
duration 20
count 1
]
edge
[
source 1665
target 1428
duration 60
count 3
]
edge
[
source 1665
target 1437
duration 180
count 7
]
edge
[
source 1665
target 1439
duration 20
count 1
]
edge
[
source 1665
target 1443
duration 60
count 3
]
edge
[
source 1665
target 1453
duration 20
count 1
]
edge
[
source 1665
target 1457
duration 120
count 5
]
edge
[
source 1665
target 1458
duration 100
count 5
]
edge
[
source 1665
target 1461
duration 20
count 1
]
edge
[
source 1665
target 1468
duration 20
count 1
]
edge
[
source 1665
target 1477
duration 20
count 1
]
edge
[
source 1665
target 1480
duration 40
count 2
]
edge
[
source 1665
target 1482
duration 120
count 5
]
edge
[
source 1665
target 1486
duration 20
count 1
]
edge
[
source 1665
target 1493
duration 20
count 1
]
edge
[
source 1665
target 1495
duration 20
count 1
]
edge
[
source 1665
target 1498
duration 40
count 2
]
edge
[
source 1665
target 1500
duration 80
count 2
]
edge
[
source 1665
target 1503
duration 180
count 8
]
edge
[
source 1665
target 1516
duration 20
count 1
]
edge
[
source 1665
target 1520
duration 40
count 2
]
edge
[
source 1665
target 1532
duration 160
count 5
]
edge
[
source 1665
target 1533
duration 20
count 1
]
edge
[
source 1666
target 1920
duration 40
count 2
]
edge
[
source 1666
target 1451
duration 40
count 1
]
edge
[
source 1666
target 1670
duration 720
count 25
]
edge
[
source 1666
target 1673
duration 500
count 20
]
edge
[
source 1666
target 1674
duration 120
count 5
]
edge
[
source 1666
target 1675
duration 280
count 12
]
edge
[
source 1666
target 1730
duration 20
count 1
]
edge
[
source 1666
target 1680
duration 120
count 5
]
edge
[
source 1666
target 1681
duration 20
count 1
]
edge
[
source 1666
target 1426
duration 20
count 1
]
edge
[
source 1666
target 1684
duration 260
count 9
]
edge
[
source 1666
target 1685
duration 20
count 1
]
edge
[
source 1666
target 1687
duration 80
count 4
]
edge
[
source 1666
target 1688
duration 360
count 16
]
edge
[
source 1666
target 1437
duration 400
count 14
]
edge
[
source 1666
target 1695
duration 7480
count 148
]
edge
[
source 1666
target 1696
duration 3580
count 95
]
edge
[
source 1666
target 1697
duration 660
count 27
]
edge
[
source 1666
target 1698
duration 840
count 29
]
edge
[
source 1666
target 1704
duration 20
count 1
]
edge
[
source 1666
target 1833
duration 20
count 1
]
edge
[
source 1666
target 1520
duration 20
count 1
]
edge
[
source 1666
target 1452
duration 20
count 1
]
edge
[
source 1666
target 1837
duration 120
count 3
]
edge
[
source 1666
target 1821
duration 40
count 1
]
edge
[
source 1666
target 1457
duration 320
count 14
]
edge
[
source 1666
target 1458
duration 100
count 4
]
edge
[
source 1666
target 1907
duration 40
count 2
]
edge
[
source 1666
target 1801
duration 20
count 1
]
edge
[
source 1666
target 1720
duration 20
count 1
]
edge
[
source 1666
target 1465
duration 40
count 2
]
edge
[
source 1666
target 1503
duration 80
count 4
]
edge
[
source 1666
target 1468
duration 20
count 1
]
edge
[
source 1666
target 1857
duration 20
count 1
]
edge
[
source 1666
target 1858
duration 20
count 1
]
edge
[
source 1666
target 1700
duration 40
count 1
]
edge
[
source 1666
target 1847
duration 20
count 1
]
edge
[
source 1666
target 1744
duration 20
count 1
]
edge
[
source 1666
target 1745
duration 380
count 18
]
edge
[
source 1666
target 1439
duration 20
count 1
]
edge
[
source 1666
target 1749
duration 40
count 2
]
edge
[
source 1666
target 1751
duration 20
count 1
]
edge
[
source 1666
target 1752
duration 20
count 1
]
edge
[
source 1666
target 1500
duration 20
count 1
]
edge
[
source 1666
target 1501
duration 20
count 1
]
edge
[
source 1666
target 1887
duration 20
count 1
]
edge
[
source 1666
target 1851
duration 20
count 1
]
edge
[
source 1666
target 1765
duration 200
count 9
]
edge
[
source 1666
target 1767
duration 60
count 3
]
edge
[
source 1666
target 1916
duration 60
count 3
]
edge
[
source 1666
target 1682
duration 160
count 8
]
edge
[
source 1666
target 1902
duration 20
count 1
]
edge
[
source 1666
target 1533
duration 20
count 1
]
edge
[
source 1666
target 1778
duration 20
count 1
]
edge
[
source 1666
target 1779
duration 60
count 3
]
edge
[
source 1666
target 1908
duration 140
count 6
]
edge
[
source 1666
target 1525
duration 20
count 1
]
edge
[
source 1666
target 1911
duration 20
count 1
]
edge
[
source 1666
target 1912
duration 1100
count 27
]
edge
[
source 1666
target 1428
duration 20
count 1
]
edge
[
source 1666
target 1532
duration 40
count 2
]
edge
[
source 1668
target 1798
duration 20
count 1
]
edge
[
source 1668
target 1495
duration 220
count 8
]
edge
[
source 1668
target 1453
duration 620
count 16
]
edge
[
source 1668
target 1427
duration 20
count 1
]
edge
[
source 1668
target 1684
duration 20
count 1
]
edge
[
source 1668
target 1695
duration 20
count 1
]
edge
[
source 1668
target 1824
duration 20
count 1
]
edge
[
source 1668
target 1698
duration 20
count 1
]
edge
[
source 1668
target 1451
duration 280
count 12
]
edge
[
source 1668
target 1452
duration 320
count 10
]
edge
[
source 1668
target 1709
duration 60
count 3
]
edge
[
source 1668
target 1457
duration 240
count 10
]
edge
[
source 1668
target 1458
duration 1020
count 34
]
edge
[
source 1668
target 1459
duration 500
count 10
]
edge
[
source 1668
target 1461
duration 360
count 11
]
edge
[
source 1668
target 1468
duration 660
count 13
]
edge
[
source 1668
target 1727
duration 20
count 1
]
edge
[
source 1668
target 1477
duration 220
count 5
]
edge
[
source 1668
target 1479
duration 140
count 5
]
edge
[
source 1668
target 1483
duration 160
count 7
]
edge
[
source 1668
target 1745
duration 60
count 1
]
edge
[
source 1668
target 1493
duration 260
count 8
]
edge
[
source 1668
target 1751
duration 460
count 13
]
edge
[
source 1668
target 1498
duration 400
count 14
]
edge
[
source 1668
target 1501
duration 480
count 15
]
edge
[
source 1668
target 1502
duration 140
count 5
]
edge
[
source 1668
target 1852
duration 60
count 2
]
edge
[
source 1668
target 1516
duration 380
count 14
]
edge
[
source 1668
target 1520
duration 260
count 10
]
edge
[
source 1668
target 1522
duration 160
count 5
]
edge
[
source 1670
target 1673
duration 20
count 1
]
edge
[
source 1670
target 1674
duration 240
count 12
]
edge
[
source 1670
target 1675
duration 460
count 18
]
edge
[
source 1670
target 1680
duration 360
count 10
]
edge
[
source 1670
target 1681
duration 40
count 2
]
edge
[
source 1670
target 1682
duration 80
count 2
]
edge
[
source 1670
target 1684
duration 200
count 6
]
edge
[
source 1670
target 1912
duration 60
count 3
]
edge
[
source 1670
target 1688
duration 720
count 18
]
edge
[
source 1670
target 1695
duration 60
count 3
]
edge
[
source 1670
target 1696
duration 1560
count 41
]
edge
[
source 1670
target 1697
duration 180
count 8
]
edge
[
source 1670
target 1698
duration 240
count 6
]
edge
[
source 1670
target 1451
duration 20
count 1
]
edge
[
source 1670
target 1458
duration 20
count 1
]
edge
[
source 1670
target 1461
duration 20
count 1
]
edge
[
source 1670
target 1852
duration 40
count 2
]
edge
[
source 1670
target 1792
duration 20
count 1
]
edge
[
source 1670
target 1477
duration 20
count 1
]
edge
[
source 1670
target 1738
duration 20
count 1
]
edge
[
source 1670
target 1498
duration 20
count 1
]
edge
[
source 1670
target 1765
duration 420
count 11
]
edge
[
source 1670
target 1745
duration 120
count 6
]
edge
[
source 1670
target 1687
duration 40
count 2
]
edge
[
source 1670
target 1902
duration 20
count 1
]
edge
[
source 1670
target 1779
duration 200
count 7
]
edge
[
source 1670
target 1908
duration 140
count 5
]
edge
[
source 1670
target 1913
duration 20
count 1
]
edge
[
source 1670
target 1919
duration 20
count 1
]
edge
[
source 1670
target 1533
duration 40
count 1
]
edge
[
source 1673
target 1920
duration 200
count 6
]
edge
[
source 1673
target 1674
duration 120
count 3
]
edge
[
source 1673
target 1675
duration 300
count 11
]
edge
[
source 1673
target 1680
duration 340
count 11
]
edge
[
source 1673
target 1681
duration 100
count 4
]
edge
[
source 1673
target 1682
duration 380
count 14
]
edge
[
source 1673
target 1684
duration 120
count 5
]
edge
[
source 1673
target 1902
duration 20
count 1
]
edge
[
source 1673
target 1687
duration 480
count 18
]
edge
[
source 1673
target 1688
duration 340
count 11
]
edge
[
source 1673
target 1727
duration 40
count 2
]
edge
[
source 1673
target 1695
duration 2940
count 76
]
edge
[
source 1673
target 1696
duration 300
count 10
]
edge
[
source 1673
target 1697
duration 180
count 6
]
edge
[
source 1673
target 1698
duration 300
count 9
]
edge
[
source 1673
target 1443
duration 20
count 1
]
edge
[
source 1673
target 1704
duration 20
count 1
]
edge
[
source 1673
target 1705
duration 20
count 1
]
edge
[
source 1673
target 1753
duration 20
count 1
]
edge
[
source 1673
target 1707
duration 20
count 1
]
edge
[
source 1673
target 1452
duration 60
count 3
]
edge
[
source 1673
target 1838
duration 20
count 1
]
edge
[
source 1673
target 1458
duration 120
count 5
]
edge
[
source 1673
target 1843
duration 20
count 1
]
edge
[
source 1673
target 1461
duration 40
count 2
]
edge
[
source 1673
target 1847
duration 20
count 1
]
edge
[
source 1673
target 1780
duration 20
count 1
]
edge
[
source 1673
target 1503
duration 20
count 1
]
edge
[
source 1673
target 1468
duration 540
count 21
]
edge
[
source 1673
target 1855
duration 20
count 1
]
edge
[
source 1673
target 1730
duration 20
count 1
]
edge
[
source 1673
target 1859
duration 20
count 1
]
edge
[
source 1673
target 1912
duration 40
count 2
]
edge
[
source 1673
target 1479
duration 20
count 1
]
edge
[
source 1673
target 1482
duration 80
count 3
]
edge
[
source 1673
target 1483
duration 20
count 1
]
edge
[
source 1673
target 1486
duration 40
count 2
]
edge
[
source 1673
target 1745
duration 440
count 13
]
edge
[
source 1673
target 1520
duration 300
count 13
]
edge
[
source 1673
target 1861
duration 20
count 1
]
edge
[
source 1673
target 1751
duration 60
count 3
]
edge
[
source 1673
target 1498
duration 100
count 5
]
edge
[
source 1673
target 1500
duration 20
count 1
]
edge
[
source 1673
target 1757
duration 20
count 1
]
edge
[
source 1673
target 1887
duration 20
count 1
]
edge
[
source 1673
target 1761
duration 140
count 5
]
edge
[
source 1673
target 1765
duration 160
count 7
]
edge
[
source 1673
target 1465
duration 20
count 1
]
edge
[
source 1673
target 1768
duration 20
count 1
]
edge
[
source 1673
target 1516
duration 80
count 2
]
edge
[
source 1673
target 1426
duration 240
count 11
]
edge
[
source 1673
target 1774
duration 40
count 1
]
edge
[
source 1673
target 1789
duration 40
count 2
]
edge
[
source 1673
target 1521
duration 20
count 1
]
edge
[
source 1673
target 1779
duration 520
count 16
]
edge
[
source 1673
target 1908
duration 740
count 26
]
edge
[
source 1673
target 1911
duration 20
count 1
]
edge
[
source 1673
target 1428
duration 40
count 2
]
edge
[
source 1673
target 1787
duration 20
count 1
]
edge
[
source 1673
target 1790
duration 20
count 1
]
edge
[
source 1674
target 1920
duration 220
count 9
]
edge
[
source 1674
target 1451
duration 20
count 1
]
edge
[
source 1674
target 1796
duration 20
count 1
]
edge
[
source 1674
target 1675
duration 120
count 5
]
edge
[
source 1674
target 1681
duration 560
count 16
]
edge
[
source 1674
target 1684
duration 100
count 4
]
edge
[
source 1674
target 1685
duration 180
count 5
]
edge
[
source 1674
target 1687
duration 300
count 10
]
edge
[
source 1674
target 1688
duration 60
count 3
]
edge
[
source 1674
target 1695
duration 1000
count 24
]
edge
[
source 1674
target 1696
duration 180
count 6
]
edge
[
source 1674
target 1697
duration 420
count 11
]
edge
[
source 1674
target 1698
duration 80
count 3
]
edge
[
source 1674
target 1711
duration 20
count 1
]
edge
[
source 1674
target 1780
duration 20
count 1
]
edge
[
source 1674
target 1731
duration 20
count 1
]
edge
[
source 1674
target 1477
duration 20
count 1
]
edge
[
source 1674
target 1745
duration 260
count 10
]
edge
[
source 1674
target 1500
duration 20
count 1
]
edge
[
source 1674
target 1765
duration 1160
count 33
]
edge
[
source 1674
target 1789
duration 20
count 1
]
edge
[
source 1674
target 1779
duration 80
count 4
]
edge
[
source 1674
target 1908
duration 500
count 20
]
edge
[
source 1674
target 1911
duration 20
count 1
]
edge
[
source 1674
target 1912
duration 120
count 5
]
edge
[
source 1674
target 1790
duration 20
count 1
]
edge
[
source 1675
target 1797
duration 20
count 1
]
edge
[
source 1675
target 1680
duration 1220
count 35
]
edge
[
source 1675
target 1681
duration 440
count 7
]
edge
[
source 1675
target 1682
duration 80
count 3
]
edge
[
source 1675
target 1684
duration 2300
count 49
]
edge
[
source 1675
target 1687
duration 240
count 8
]
edge
[
source 1675
target 1688
duration 2000
count 44
]
edge
[
source 1675
target 1434
duration 60
count 2
]
edge
[
source 1675
target 1437
duration 100
count 2
]
edge
[
source 1675
target 1822
duration 40
count 2
]
edge
[
source 1675
target 1695
duration 940
count 29
]
edge
[
source 1675
target 1696
duration 4200
count 87
]
edge
[
source 1675
target 1697
duration 180
count 7
]
edge
[
source 1675
target 1698
duration 280
count 10
]
edge
[
source 1675
target 1704
duration 60
count 3
]
edge
[
source 1675
target 1753
duration 20
count 1
]
edge
[
source 1675
target 1835
duration 60
count 1
]
edge
[
source 1675
target 1452
duration 20
count 1
]
edge
[
source 1675
target 1711
duration 20
count 1
]
edge
[
source 1675
target 1458
duration 20
count 1
]
edge
[
source 1675
target 1907
duration 20
count 1
]
edge
[
source 1675
target 1461
duration 20
count 1
]
edge
[
source 1675
target 1847
duration 40
count 2
]
edge
[
source 1675
target 1503
duration 20
count 1
]
edge
[
source 1675
target 1852
duration 60
count 3
]
edge
[
source 1675
target 1727
duration 20
count 1
]
edge
[
source 1675
target 1498
duration 40
count 2
]
edge
[
source 1675
target 1857
duration 20
count 1
]
edge
[
source 1675
target 1920
duration 200
count 9
]
edge
[
source 1675
target 1912
duration 1040
count 32
]
edge
[
source 1675
target 1479
duration 20
count 1
]
edge
[
source 1675
target 1744
duration 20
count 1
]
edge
[
source 1675
target 1745
duration 420
count 18
]
edge
[
source 1675
target 1502
duration 20
count 1
]
edge
[
source 1675
target 1493
duration 20
count 1
]
edge
[
source 1675
target 1495
duration 20
count 1
]
edge
[
source 1675
target 1730
duration 120
count 3
]
edge
[
source 1675
target 1885
duration 20
count 1
]
edge
[
source 1675
target 1759
duration 40
count 2
]
edge
[
source 1675
target 1887
duration 60
count 2
]
edge
[
source 1675
target 1761
duration 40
count 2
]
edge
[
source 1675
target 1764
duration 20
count 1
]
edge
[
source 1675
target 1765
duration 380
count 14
]
edge
[
source 1675
target 1768
duration 40
count 1
]
edge
[
source 1675
target 1772
duration 20
count 1
]
edge
[
source 1675
target 1533
duration 340
count 13
]
edge
[
source 1675
target 1520
duration 20
count 1
]
edge
[
source 1675
target 1906
duration 20
count 1
]
edge
[
source 1675
target 1779
duration 760
count 12
]
edge
[
source 1675
target 1908
duration 1620
count 47
]
edge
[
source 1675
target 1787
duration 60
count 2
]
edge
[
source 1675
target 1532
duration 20
count 1
]
edge
[
source 1675
target 1790
duration 60
count 2
]
edge
[
source 1680
target 1920
duration 20
count 1
]
edge
[
source 1680
target 1681
duration 160
count 4
]
edge
[
source 1680
target 1682
duration 20
count 1
]
edge
[
source 1680
target 1684
duration 40
count 2
]
edge
[
source 1680
target 1912
duration 320
count 13
]
edge
[
source 1680
target 1688
duration 1440
count 42
]
edge
[
source 1680
target 1695
duration 100
count 5
]
edge
[
source 1680
target 1696
duration 140
count 7
]
edge
[
source 1680
target 1697
duration 920
count 31
]
edge
[
source 1680
target 1698
duration 280
count 11
]
edge
[
source 1680
target 1700
duration 20
count 1
]
edge
[
source 1680
target 1711
duration 20
count 1
]
edge
[
source 1680
target 1457
duration 20
count 1
]
edge
[
source 1680
target 1907
duration 20
count 1
]
edge
[
source 1680
target 1461
duration 20
count 1
]
edge
[
source 1680
target 1468
duration 20
count 1
]
edge
[
source 1680
target 1730
duration 20
count 1
]
edge
[
source 1680
target 1859
duration 20
count 1
]
edge
[
source 1680
target 1479
duration 20
count 1
]
edge
[
source 1680
target 1745
duration 120
count 6
]
edge
[
source 1680
target 1495
duration 20
count 1
]
edge
[
source 1680
target 1498
duration 20
count 1
]
edge
[
source 1680
target 1759
duration 20
count 1
]
edge
[
source 1680
target 1789
duration 20
count 1
]
edge
[
source 1680
target 1765
duration 380
count 11
]
edge
[
source 1680
target 1687
duration 40
count 2
]
edge
[
source 1680
target 1902
duration 20
count 1
]
edge
[
source 1680
target 1520
duration 20
count 1
]
edge
[
source 1680
target 1779
duration 760
count 20
]
edge
[
source 1680
target 1908
duration 2560
count 70
]
edge
[
source 1680
target 1913
duration 20
count 1
]
edge
[
source 1681
target 1920
duration 200
count 9
]
edge
[
source 1681
target 1682
duration 660
count 15
]
edge
[
source 1681
target 1684
duration 60
count 3
]
edge
[
source 1681
target 1687
duration 100
count 3
]
edge
[
source 1681
target 1688
duration 40
count 2
]
edge
[
source 1681
target 1695
duration 440
count 9
]
edge
[
source 1681
target 1696
duration 200
count 7
]
edge
[
source 1681
target 1697
duration 660
count 24
]
edge
[
source 1681
target 1698
duration 580
count 18
]
edge
[
source 1681
target 1837
duration 20
count 1
]
edge
[
source 1681
target 1745
duration 420
count 14
]
edge
[
source 1681
target 1493
duration 60
count 2
]
edge
[
source 1681
target 1759
duration 20
count 1
]
edge
[
source 1681
target 1504
duration 20
count 1
]
edge
[
source 1681
target 1765
duration 1560
count 47
]
edge
[
source 1681
target 1779
duration 300
count 9
]
edge
[
source 1681
target 1908
duration 1160
count 37
]
edge
[
source 1681
target 1912
duration 2640
count 67
]
edge
[
source 1682
target 1427
duration 20
count 1
]
edge
[
source 1682
target 1684
duration 40
count 2
]
edge
[
source 1682
target 1687
duration 820
count 23
]
edge
[
source 1682
target 1688
duration 40
count 2
]
edge
[
source 1682
target 1695
duration 200
count 8
]
edge
[
source 1682
target 1696
duration 120
count 5
]
edge
[
source 1682
target 1697
duration 320
count 9
]
edge
[
source 1682
target 1698
duration 300
count 10
]
edge
[
source 1682
target 1745
duration 220
count 8
]
edge
[
source 1682
target 1752
duration 20
count 1
]
edge
[
source 1682
target 1765
duration 60
count 2
]
edge
[
source 1682
target 1902
duration 20
count 1
]
edge
[
source 1682
target 1779
duration 700
count 15
]
edge
[
source 1682
target 1912
duration 60
count 1
]
edge
[
source 1682
target 1916
duration 20
count 1
]
edge
[
source 1684
target 1920
duration 60
count 3
]
edge
[
source 1684
target 1501
duration 20
count 1
]
edge
[
source 1684
target 1797
duration 20
count 1
]
edge
[
source 1684
target 1687
duration 60
count 3
]
edge
[
source 1684
target 1688
duration 3340
count 67
]
edge
[
source 1684
target 1434
duration 220
count 7
]
edge
[
source 1684
target 1437
duration 240
count 8
]
edge
[
source 1684
target 1695
duration 200
count 8
]
edge
[
source 1684
target 1696
duration 1180
count 35
]
edge
[
source 1684
target 1697
duration 520
count 20
]
edge
[
source 1684
target 1698
duration 680
count 25
]
edge
[
source 1684
target 1443
duration 100
count 3
]
edge
[
source 1684
target 1700
duration 20
count 1
]
edge
[
source 1684
target 1457
duration 20
count 1
]
edge
[
source 1684
target 1704
duration 40
count 2
]
edge
[
source 1684
target 1705
duration 100
count 4
]
edge
[
source 1684
target 1835
duration 100
count 3
]
edge
[
source 1684
target 1837
duration 40
count 1
]
edge
[
source 1684
target 1838
duration 40
count 2
]
edge
[
source 1684
target 1821
duration 20
count 1
]
edge
[
source 1684
target 1503
duration 100
count 5
]
edge
[
source 1684
target 1468
duration 20
count 1
]
edge
[
source 1684
target 1857
duration 20
count 1
]
edge
[
source 1684
target 1730
duration 120
count 6
]
edge
[
source 1684
target 1732
duration 20
count 1
]
edge
[
source 1684
target 1861
duration 20
count 1
]
edge
[
source 1684
target 1480
duration 20
count 1
]
edge
[
source 1684
target 1866
duration 260
count 11
]
edge
[
source 1684
target 1847
duration 500
count 13
]
edge
[
source 1684
target 1486
duration 20
count 1
]
edge
[
source 1684
target 1745
duration 360
count 17
]
edge
[
source 1684
target 1493
duration 20
count 1
]
edge
[
source 1684
target 1912
duration 1780
count 35
]
edge
[
source 1684
target 1885
duration 60
count 3
]
edge
[
source 1684
target 1887
duration 80
count 4
]
edge
[
source 1684
target 1761
duration 20
count 1
]
edge
[
source 1684
target 1765
duration 360
count 14
]
edge
[
source 1684
target 1426
duration 80
count 4
]
edge
[
source 1684
target 1533
duration 280
count 10
]
edge
[
source 1684
target 1779
duration 1340
count 44
]
edge
[
source 1684
target 1908
duration 300
count 14
]
edge
[
source 1684
target 1909
duration 20
count 1
]
edge
[
source 1684
target 1532
duration 20
count 1
]
edge
[
source 1685
target 1707
duration 320
count 12
]
edge
[
source 1685
target 1796
duration 120
count 3
]
edge
[
source 1685
target 1801
duration 100
count 3
]
edge
[
source 1685
target 1838
duration 180
count 5
]
edge
[
source 1685
target 1712
duration 320
count 9
]
edge
[
source 1685
target 1713
duration 20
count 1
]
edge
[
source 1685
target 1719
duration 80
count 2
]
edge
[
source 1685
target 1720
duration 680
count 11
]
edge
[
source 1685
target 1695
duration 20
count 1
]
edge
[
source 1685
target 1727
duration 440
count 13
]
edge
[
source 1685
target 1731
duration 480
count 16
]
edge
[
source 1685
target 1737
duration 80
count 3
]
edge
[
source 1685
target 1741
duration 40
count 2
]
edge
[
source 1685
target 1872
duration 20
count 1
]
edge
[
source 1685
target 1748
duration 80
count 2
]
edge
[
source 1685
target 1700
duration 100
count 5
]
edge
[
source 1685
target 1722
duration 20
count 1
]
edge
[
source 1685
target 1744
duration 340
count 7
]
edge
[
source 1685
target 1898
duration 20
count 1
]
edge
[
source 1685
target 1780
duration 80
count 3
]
edge
[
source 1685
target 1909
duration 40
count 2
]
edge
[
source 1685
target 1912
duration 20
count 1
]
edge
[
source 1685
target 1790
duration 20
count 1
]
edge
[
source 1687
target 1920
duration 640
count 17
]
edge
[
source 1687
target 1688
duration 60
count 2
]
edge
[
source 1687
target 1695
duration 1220
count 29
]
edge
[
source 1687
target 1696
duration 120
count 4
]
edge
[
source 1687
target 1697
duration 20
count 1
]
edge
[
source 1687
target 1698
duration 80
count 4
]
edge
[
source 1687
target 1453
duration 20
count 1
]
edge
[
source 1687
target 1711
duration 20
count 1
]
edge
[
source 1687
target 1779
duration 300
count 14
]
edge
[
source 1687
target 1468
duration 20
count 1
]
edge
[
source 1687
target 1859
duration 20
count 1
]
edge
[
source 1687
target 1483
duration 20
count 1
]
edge
[
source 1687
target 1745
duration 120
count 6
]
edge
[
source 1687
target 1753
duration 20
count 1
]
edge
[
source 1687
target 1757
duration 20
count 1
]
edge
[
source 1687
target 1503
duration 40
count 1
]
edge
[
source 1687
target 1459
duration 20
count 1
]
edge
[
source 1687
target 1765
duration 1100
count 13
]
edge
[
source 1687
target 1520
duration 20
count 1
]
edge
[
source 1687
target 1907
duration 20
count 1
]
edge
[
source 1687
target 1908
duration 20
count 1
]
edge
[
source 1687
target 1913
duration 20
count 1
]
edge
[
source 1688
target 1920
duration 80
count 4
]
edge
[
source 1688
target 1835
duration 40
count 1
]
edge
[
source 1688
target 1796
duration 20
count 1
]
edge
[
source 1688
target 1800
duration 20
count 1
]
edge
[
source 1688
target 1815
duration 20
count 1
]
edge
[
source 1688
target 1434
duration 20
count 1
]
edge
[
source 1688
target 1437
duration 40
count 1
]
edge
[
source 1688
target 1695
duration 100
count 4
]
edge
[
source 1688
target 1696
duration 560
count 19
]
edge
[
source 1688
target 1697
duration 960
count 34
]
edge
[
source 1688
target 1698
duration 440
count 16
]
edge
[
source 1688
target 1443
duration 40
count 2
]
edge
[
source 1688
target 1520
duration 20
count 1
]
edge
[
source 1688
target 1757
duration 20
count 1
]
edge
[
source 1688
target 1457
duration 40
count 2
]
edge
[
source 1688
target 1907
duration 20
count 1
]
edge
[
source 1688
target 1908
duration 640
count 20
]
edge
[
source 1688
target 1468
duration 20
count 1
]
edge
[
source 1688
target 1859
duration 20
count 1
]
edge
[
source 1688
target 1482
duration 20
count 1
]
edge
[
source 1688
target 1483
duration 20
count 1
]
edge
[
source 1688
target 1745
duration 1320
count 51
]
edge
[
source 1688
target 1749
duration 20
count 1
]
edge
[
source 1688
target 1751
duration 20
count 1
]
edge
[
source 1688
target 1498
duration 40
count 2
]
edge
[
source 1688
target 1533
duration 120
count 4
]
edge
[
source 1688
target 1761
duration 20
count 1
]
edge
[
source 1688
target 1765
duration 280
count 10
]
edge
[
source 1688
target 1495
duration 20
count 1
]
edge
[
source 1688
target 1768
duration 20
count 1
]
edge
[
source 1688
target 1902
duration 40
count 2
]
edge
[
source 1688
target 1519
duration 20
count 1
]
edge
[
source 1688
target 1779
duration 80
count 4
]
edge
[
source 1688
target 1912
duration 2160
count 47
]
edge
[
source 1688
target 1911
duration 20
count 1
]
edge
[
source 1688
target 1919
duration 20
count 1
]
edge
[
source 1695
target 1920
duration 1320
count 23
]
edge
[
source 1695
target 1711
duration 40
count 2
]
edge
[
source 1695
target 1722
duration 20
count 1
]
edge
[
source 1695
target 1922
duration 40
count 2
]
edge
[
source 1695
target 1796
duration 40
count 1
]
edge
[
source 1695
target 1434
duration 20
count 1
]
edge
[
source 1695
target 1437
duration 700
count 20
]
edge
[
source 1695
target 1696
duration 560
count 20
]
edge
[
source 1695
target 1697
duration 80
count 4
]
edge
[
source 1695
target 1698
duration 100
count 4
]
edge
[
source 1695
target 1835
duration 20
count 1
]
edge
[
source 1695
target 1452
duration 40
count 2
]
edge
[
source 1695
target 1837
duration 300
count 7
]
edge
[
source 1695
target 1501
duration 60
count 2
]
edge
[
source 1695
target 1457
duration 280
count 12
]
edge
[
source 1695
target 1458
duration 420
count 9
]
edge
[
source 1695
target 1907
duration 40
count 2
]
edge
[
source 1695
target 1801
duration 40
count 2
]
edge
[
source 1695
target 1465
duration 20
count 1
]
edge
[
source 1695
target 1852
duration 20
count 1
]
edge
[
source 1695
target 1727
duration 20
count 1
]
edge
[
source 1695
target 1730
duration 20
count 1
]
edge
[
source 1695
target 1483
duration 20
count 1
]
edge
[
source 1695
target 1912
duration 120
count 5
]
edge
[
source 1695
target 1480
duration 20
count 1
]
edge
[
source 1695
target 1482
duration 20
count 1
]
edge
[
source 1695
target 1847
duration 20
count 1
]
edge
[
source 1695
target 1493
duration 20
count 1
]
edge
[
source 1695
target 1752
duration 20
count 1
]
edge
[
source 1695
target 1498
duration 20
count 1
]
edge
[
source 1695
target 1757
duration 240
count 8
]
edge
[
source 1695
target 1502
duration 20
count 1
]
edge
[
source 1695
target 1759
duration 60
count 3
]
edge
[
source 1695
target 1906
duration 20
count 1
]
edge
[
source 1695
target 1761
duration 40
count 2
]
edge
[
source 1695
target 1890
duration 20
count 1
]
edge
[
source 1695
target 1765
duration 80
count 3
]
edge
[
source 1695
target 1745
duration 460
count 18
]
edge
[
source 1695
target 1768
duration 20
count 1
]
edge
[
source 1695
target 1426
duration 20
count 1
]
edge
[
source 1695
target 1533
duration 40
count 1
]
edge
[
source 1695
target 1520
duration 20
count 1
]
edge
[
source 1695
target 1778
duration 20
count 1
]
edge
[
source 1695
target 1779
duration 140
count 6
]
edge
[
source 1695
target 1908
duration 140
count 6
]
edge
[
source 1695
target 1428
duration 40
count 2
]
edge
[
source 1695
target 1787
duration 20
count 1
]
edge
[
source 1695
target 1532
duration 20
count 1
]
edge
[
source 1696
target 1426
duration 20
count 1
]
edge
[
source 1696
target 1428
duration 20
count 1
]
edge
[
source 1696
target 1774
duration 300
count 4
]
edge
[
source 1696
target 1434
duration 60
count 3
]
edge
[
source 1696
target 1437
duration 20
count 1
]
edge
[
source 1696
target 1697
duration 120
count 5
]
edge
[
source 1696
target 1698
duration 220
count 6
]
edge
[
source 1696
target 1443
duration 40
count 1
]
edge
[
source 1696
target 1700
duration 20
count 1
]
edge
[
source 1696
target 1885
duration 40
count 2
]
edge
[
source 1696
target 1704
duration 20
count 1
]
edge
[
source 1696
target 1705
duration 20
count 1
]
edge
[
source 1696
target 1835
duration 40
count 2
]
edge
[
source 1696
target 1452
duration 20
count 1
]
edge
[
source 1696
target 1501
duration 40
count 2
]
edge
[
source 1696
target 1457
duration 40
count 2
]
edge
[
source 1696
target 1719
duration 20
count 1
]
edge
[
source 1696
target 1465
duration 20
count 1
]
edge
[
source 1696
target 1857
duration 20
count 1
]
edge
[
source 1696
target 1920
duration 20
count 1
]
edge
[
source 1696
target 1912
duration 280
count 13
]
edge
[
source 1696
target 1866
duration 20
count 1
]
edge
[
source 1696
target 1745
duration 260
count 13
]
edge
[
source 1696
target 1495
duration 20
count 1
]
edge
[
source 1696
target 1498
duration 20
count 1
]
edge
[
source 1696
target 1757
duration 20
count 1
]
edge
[
source 1696
target 1502
duration 20
count 1
]
edge
[
source 1696
target 1887
duration 20
count 1
]
edge
[
source 1696
target 1890
duration 40
count 2
]
edge
[
source 1696
target 1765
duration 80
count 3
]
edge
[
source 1696
target 1768
duration 60
count 3
]
edge
[
source 1696
target 1902
duration 20
count 1
]
edge
[
source 1696
target 1779
duration 720
count 19
]
edge
[
source 1696
target 1908
duration 260
count 13
]
edge
[
source 1696
target 1730
duration 60
count 2
]
edge
[
source 1696
target 1917
duration 20
count 1
]
edge
[
source 1696
target 1790
duration 20
count 1
]
edge
[
source 1697
target 1796
duration 20
count 1
]
edge
[
source 1697
target 1709
duration 20
count 1
]
edge
[
source 1697
target 1774
duration 20
count 1
]
edge
[
source 1697
target 1437
duration 60
count 2
]
edge
[
source 1697
target 1822
duration 40
count 2
]
edge
[
source 1697
target 1698
duration 5140
count 101
]
edge
[
source 1697
target 1443
duration 200
count 8
]
edge
[
source 1697
target 1700
duration 20
count 1
]
edge
[
source 1697
target 1833
duration 40
count 2
]
edge
[
source 1697
target 1837
duration 100
count 3
]
edge
[
source 1697
target 1757
duration 40
count 2
]
edge
[
source 1697
target 1457
duration 40
count 2
]
edge
[
source 1697
target 1458
duration 20
count 1
]
edge
[
source 1697
target 1907
duration 20
count 1
]
edge
[
source 1697
target 1719
duration 20
count 1
]
edge
[
source 1697
target 1720
duration 20
count 1
]
edge
[
source 1697
target 1780
duration 20
count 1
]
edge
[
source 1697
target 1722
duration 20
count 1
]
edge
[
source 1697
target 1851
duration 80
count 3
]
edge
[
source 1697
target 1852
duration 20
count 1
]
edge
[
source 1697
target 1792
duration 40
count 2
]
edge
[
source 1697
target 1775
duration 40
count 1
]
edge
[
source 1697
target 1730
duration 120
count 6
]
edge
[
source 1697
target 1759
duration 100
count 3
]
edge
[
source 1697
target 1482
duration 20
count 1
]
edge
[
source 1697
target 1847
duration 20
count 1
]
edge
[
source 1697
target 1920
duration 80
count 4
]
edge
[
source 1697
target 1486
duration 40
count 2
]
edge
[
source 1697
target 1745
duration 2400
count 74
]
edge
[
source 1697
target 1493
duration 360
count 11
]
edge
[
source 1697
target 1751
duration 20
count 1
]
edge
[
source 1697
target 1752
duration 80
count 4
]
edge
[
source 1697
target 1498
duration 60
count 3
]
edge
[
source 1697
target 1533
duration 40
count 2
]
edge
[
source 1697
target 1501
duration 460
count 13
]
edge
[
source 1697
target 1502
duration 960
count 14
]
edge
[
source 1697
target 1503
duration 40
count 1
]
edge
[
source 1697
target 1761
duration 60
count 2
]
edge
[
source 1697
target 1764
duration 60
count 2
]
edge
[
source 1697
target 1765
duration 600
count 23
]
edge
[
source 1697
target 1766
duration 40
count 2
]
edge
[
source 1697
target 1767
duration 60
count 3
]
edge
[
source 1697
target 1468
duration 20
count 1
]
edge
[
source 1697
target 1902
duration 20
count 1
]
edge
[
source 1697
target 1917
duration 20
count 1
]
edge
[
source 1697
target 1779
duration 200
count 7
]
edge
[
source 1697
target 1908
duration 680
count 27
]
edge
[
source 1697
target 1782
duration 40
count 2
]
edge
[
source 1697
target 1705
duration 20
count 1
]
edge
[
source 1697
target 1912
duration 6200
count 117
]
edge
[
source 1697
target 1428
duration 40
count 2
]
edge
[
source 1697
target 1787
duration 20
count 1
]
edge
[
source 1697
target 1532
duration 80
count 3
]
edge
[
source 1698
target 1920
duration 100
count 5
]
edge
[
source 1698
target 1797
duration 60
count 1
]
edge
[
source 1698
target 1426
duration 20
count 1
]
edge
[
source 1698
target 1434
duration 20
count 1
]
edge
[
source 1698
target 1437
duration 80
count 1
]
edge
[
source 1698
target 1822
duration 20
count 1
]
edge
[
source 1698
target 1443
duration 60
count 3
]
edge
[
source 1698
target 1833
duration 80
count 3
]
edge
[
source 1698
target 1493
duration 20
count 1
]
edge
[
source 1698
target 1452
duration 20
count 1
]
edge
[
source 1698
target 1837
duration 120
count 2
]
edge
[
source 1698
target 1457
duration 80
count 4
]
edge
[
source 1698
target 1458
duration 20
count 1
]
edge
[
source 1698
target 1459
duration 20
count 1
]
edge
[
source 1698
target 1461
duration 20
count 1
]
edge
[
source 1698
target 1908
duration 220
count 10
]
edge
[
source 1698
target 1722
duration 20
count 1
]
edge
[
source 1698
target 1851
duration 60
count 2
]
edge
[
source 1698
target 1468
duration 20
count 1
]
edge
[
source 1698
target 1775
duration 160
count 4
]
edge
[
source 1698
target 1730
duration 60
count 3
]
edge
[
source 1698
target 1866
duration 780
count 20
]
edge
[
source 1698
target 1847
duration 1260
count 24
]
edge
[
source 1698
target 1745
duration 1180
count 50
]
edge
[
source 1698
target 1799
duration 20
count 1
]
edge
[
source 1698
target 1780
duration 20
count 1
]
edge
[
source 1698
target 1503
duration 80
count 3
]
edge
[
source 1698
target 1751
duration 80
count 4
]
edge
[
source 1698
target 1498
duration 20
count 1
]
edge
[
source 1698
target 1759
duration 200
count 3
]
edge
[
source 1698
target 1764
duration 20
count 1
]
edge
[
source 1698
target 1765
duration 240
count 10
]
edge
[
source 1698
target 1767
duration 40
count 2
]
edge
[
source 1698
target 1852
duration 20
count 1
]
edge
[
source 1698
target 1500
duration 140
count 5
]
edge
[
source 1698
target 1779
duration 340
count 12
]
edge
[
source 1698
target 1912
duration 1840
count 35
]
edge
[
source 1698
target 1782
duration 40
count 1
]
edge
[
source 1698
target 1705
duration 420
count 17
]
edge
[
source 1698
target 1428
duration 40
count 2
]
edge
[
source 1698
target 1532
duration 80
count 4
]
edge
[
source 1698
target 1533
duration 60
count 3
]
edge
[
source 1698
target 1790
duration 20
count 1
]
edge
[
source 1700
target 1911
duration 20
count 1
]
edge
[
source 1700
target 1707
duration 1520
count 52
]
edge
[
source 1700
target 1859
duration 420
count 9
]
edge
[
source 1700
target 1799
duration 20
count 1
]
edge
[
source 1700
target 1801
duration 180
count 6
]
edge
[
source 1700
target 1426
duration 20
count 1
]
edge
[
source 1700
target 1428
duration 20
count 1
]
edge
[
source 1700
target 1822
duration 80
count 4
]
edge
[
source 1700
target 1704
duration 60
count 2
]
edge
[
source 1700
target 1705
duration 20
count 1
]
edge
[
source 1700
target 1709
duration 60
count 3
]
edge
[
source 1700
target 1838
duration 20
count 1
]
edge
[
source 1700
target 1757
duration 40
count 2
]
edge
[
source 1700
target 1712
duration 320
count 9
]
edge
[
source 1700
target 1843
duration 80
count 3
]
edge
[
source 1700
target 1847
duration 20
count 1
]
edge
[
source 1700
target 1720
duration 40
count 2
]
edge
[
source 1700
target 1722
duration 20
count 1
]
edge
[
source 1700
target 1723
duration 20
count 1
]
edge
[
source 1700
target 1854
duration 40
count 1
]
edge
[
source 1700
target 1855
duration 20
count 1
]
edge
[
source 1700
target 1741
duration 20
count 1
]
edge
[
source 1700
target 1731
duration 240
count 7
]
edge
[
source 1700
target 1861
duration 60
count 3
]
edge
[
source 1700
target 1866
duration 60
count 3
]
edge
[
source 1700
target 1719
duration 100
count 3
]
edge
[
source 1700
target 1851
duration 40
count 2
]
edge
[
source 1700
target 1744
duration 140
count 6
]
edge
[
source 1700
target 1748
duration 160
count 4
]
edge
[
source 1700
target 1495
duration 40
count 1
]
edge
[
source 1700
target 1477
duration 20
count 1
]
edge
[
source 1700
target 1887
duration 20
count 1
]
edge
[
source 1700
target 1890
duration 100
count 3
]
edge
[
source 1700
target 1708
duration 360
count 9
]
edge
[
source 1700
target 1764
duration 60
count 2
]
edge
[
source 1700
target 1765
duration 20
count 1
]
edge
[
source 1700
target 1767
duration 620
count 15
]
edge
[
source 1700
target 1768
duration 200
count 7
]
edge
[
source 1700
target 1774
duration 20
count 1
]
edge
[
source 1700
target 1778
duration 140
count 5
]
edge
[
source 1700
target 1907
duration 60
count 3
]
edge
[
source 1700
target 1780
duration 340
count 16
]
edge
[
source 1700
target 1909
duration 20
count 1
]
edge
[
source 1700
target 1833
duration 140
count 6
]
edge
[
source 1700
target 1912
duration 180
count 6
]
edge
[
source 1700
target 1795
duration 20
count 1
]
edge
[
source 1700
target 1727
duration 140
count 5
]
edge
[
source 1700
target 1916
duration 100
count 5
]
edge
[
source 1700
target 1790
duration 100
count 5
]
edge
[
source 1702
target 1704
duration 520
count 13
]
edge
[
source 1702
target 1706
duration 20
count 1
]
edge
[
source 1702
target 1708
duration 40
count 2
]
edge
[
source 1702
target 1710
duration 40
count 2
]
edge
[
source 1702
target 1715
duration 20
count 1
]
edge
[
source 1702
target 1718
duration 60
count 2
]
edge
[
source 1702
target 1851
duration 280
count 12
]
edge
[
source 1702
target 1854
duration 3080
count 100
]
edge
[
source 1702
target 1855
duration 80
count 4
]
edge
[
source 1702
target 1858
duration 120
count 3
]
edge
[
source 1702
target 1732
duration 20
count 1
]
edge
[
source 1702
target 1861
duration 40
count 2
]
edge
[
source 1702
target 1863
duration 60
count 3
]
edge
[
source 1702
target 1737
duration 20
count 1
]
edge
[
source 1702
target 1739
duration 140
count 3
]
edge
[
source 1702
target 1743
duration 100
count 5
]
edge
[
source 1702
target 1872
duration 60
count 3
]
edge
[
source 1702
target 1749
duration 480
count 11
]
edge
[
source 1702
target 1883
duration 80
count 3
]
edge
[
source 1702
target 1887
duration 140
count 7
]
edge
[
source 1702
target 1889
duration 3520
count 84
]
edge
[
source 1702
target 1890
duration 80
count 4
]
edge
[
source 1702
target 1897
duration 160
count 5
]
edge
[
source 1702
target 1877
duration 840
count 15
]
edge
[
source 1704
target 1922
duration 20
count 1
]
edge
[
source 1704
target 1795
duration 20
count 1
]
edge
[
source 1704
target 1767
duration 100
count 2
]
edge
[
source 1704
target 1822
duration 100
count 5
]
edge
[
source 1704
target 1833
duration 520
count 19
]
edge
[
source 1704
target 1706
duration 40
count 2
]
edge
[
source 1704
target 1708
duration 200
count 7
]
edge
[
source 1704
target 1778
duration 20
count 1
]
edge
[
source 1704
target 1710
duration 40
count 1
]
edge
[
source 1704
target 1713
duration 2800
count 70
]
edge
[
source 1704
target 1843
duration 120
count 4
]
edge
[
source 1704
target 1718
duration 140
count 7
]
edge
[
source 1704
target 1719
duration 40
count 2
]
edge
[
source 1704
target 1851
duration 280
count 9
]
edge
[
source 1704
target 1854
duration 120
count 4
]
edge
[
source 1704
target 1855
duration 260
count 12
]
edge
[
source 1704
target 1858
duration 200
count 8
]
edge
[
source 1704
target 1859
duration 280
count 9
]
edge
[
source 1704
target 1732
duration 140
count 6
]
edge
[
source 1704
target 1861
duration 200
count 8
]
edge
[
source 1704
target 1863
duration 100
count 4
]
edge
[
source 1704
target 1737
duration 20
count 1
]
edge
[
source 1704
target 1739
duration 140
count 3
]
edge
[
source 1704
target 1743
duration 60
count 3
]
edge
[
source 1704
target 1872
duration 300
count 11
]
edge
[
source 1704
target 1748
duration 60
count 3
]
edge
[
source 1704
target 1877
duration 1160
count 37
]
edge
[
source 1704
target 1752
duration 20
count 1
]
edge
[
source 1704
target 1883
duration 160
count 4
]
edge
[
source 1704
target 1757
duration 220
count 11
]
edge
[
source 1704
target 1887
duration 2860
count 45
]
edge
[
source 1704
target 1889
duration 440
count 12
]
edge
[
source 1704
target 1890
duration 320
count 13
]
edge
[
source 1704
target 1763
duration 200
count 10
]
edge
[
source 1704
target 1895
duration 20
count 1
]
edge
[
source 1704
target 1768
duration 60
count 3
]
edge
[
source 1704
target 1897
duration 80
count 3
]
edge
[
source 1704
target 1898
duration 140
count 5
]
edge
[
source 1704
target 1902
duration 100
count 5
]
edge
[
source 1704
target 1907
duration 20
count 1
]
edge
[
source 1704
target 1780
duration 40
count 2
]
edge
[
source 1704
target 1909
duration 20
count 1
]
edge
[
source 1704
target 1782
duration 20
count 1
]
edge
[
source 1704
target 1911
duration 80
count 2
]
edge
[
source 1704
target 1912
duration 20
count 1
]
edge
[
source 1704
target 1916
duration 160
count 6
]
edge
[
source 1704
target 1790
duration 160
count 6
]
edge
[
source 1704
target 1749
duration 360
count 12
]
edge
[
source 1705
target 1797
duration 780
count 28
]
edge
[
source 1705
target 1426
duration 40
count 1
]
edge
[
source 1705
target 1815
duration 40
count 2
]
edge
[
source 1705
target 1821
duration 20
count 1
]
edge
[
source 1705
target 1822
duration 20
count 1
]
edge
[
source 1705
target 1439
duration 780
count 21
]
edge
[
source 1705
target 1443
duration 220
count 6
]
edge
[
source 1705
target 1835
duration 20
count 1
]
edge
[
source 1705
target 1837
duration 180
count 6
]
edge
[
source 1705
target 1480
duration 200
count 6
]
edge
[
source 1705
target 1458
duration 20
count 1
]
edge
[
source 1705
target 1847
duration 340
count 16
]
edge
[
source 1705
target 1465
duration 80
count 2
]
edge
[
source 1705
target 1851
duration 20
count 1
]
edge
[
source 1705
target 1857
duration 20
count 1
]
edge
[
source 1705
target 1730
duration 40
count 2
]
edge
[
source 1705
target 1477
duration 20
count 1
]
edge
[
source 1705
target 1866
duration 1020
count 30
]
edge
[
source 1705
target 1753
duration 20
count 1
]
edge
[
source 1705
target 1500
duration 480
count 21
]
edge
[
source 1705
target 1503
duration 360
count 15
]
edge
[
source 1705
target 1504
duration 140
count 5
]
edge
[
source 1705
target 1889
duration 20
count 1
]
edge
[
source 1705
target 1890
duration 20
count 1
]
edge
[
source 1705
target 1519
duration 20
count 1
]
edge
[
source 1705
target 1524
duration 20
count 1
]
edge
[
source 1705
target 1525
duration 20
count 1
]
edge
[
source 1705
target 1911
duration 20
count 1
]
edge
[
source 1705
target 1528
duration 520
count 15
]
edge
[
source 1705
target 1428
duration 40
count 2
]
edge
[
source 1705
target 1532
duration 80
count 4
]
edge
[
source 1705
target 1533
duration 80
count 4
]
edge
[
source 1706
target 1708
duration 380
count 16
]
edge
[
source 1706
target 1710
duration 40
count 2
]
edge
[
source 1706
target 1713
duration 80
count 4
]
edge
[
source 1706
target 1715
duration 380
count 11
]
edge
[
source 1706
target 1718
duration 380
count 12
]
edge
[
source 1706
target 1851
duration 7000
count 71
]
edge
[
source 1706
target 1852
duration 40
count 1
]
edge
[
source 1706
target 1854
duration 80
count 4
]
edge
[
source 1706
target 1855
duration 40
count 2
]
edge
[
source 1706
target 1858
duration 160
count 8
]
edge
[
source 1706
target 1732
duration 20
count 1
]
edge
[
source 1706
target 1861
duration 8840
count 114
]
edge
[
source 1706
target 1739
duration 80
count 3
]
edge
[
source 1706
target 1743
duration 420
count 16
]
edge
[
source 1706
target 1872
duration 320
count 12
]
edge
[
source 1706
target 1877
duration 40
count 2
]
edge
[
source 1706
target 1887
duration 140
count 6
]
edge
[
source 1706
target 1889
duration 60
count 3
]
edge
[
source 1706
target 1890
duration 380
count 13
]
edge
[
source 1706
target 1897
duration 160
count 6
]
edge
[
source 1706
target 1898
duration 200
count 8
]
edge
[
source 1706
target 1749
duration 180
count 5
]
edge
[
source 1707
target 1795
duration 460
count 8
]
edge
[
source 1707
target 1708
duration 60
count 3
]
edge
[
source 1707
target 1809
duration 40
count 2
]
edge
[
source 1707
target 1820
duration 500
count 8
]
edge
[
source 1707
target 1822
duration 40
count 2
]
edge
[
source 1707
target 1709
duration 160
count 7
]
edge
[
source 1707
target 1838
duration 420
count 16
]
edge
[
source 1707
target 1712
duration 280
count 5
]
edge
[
source 1707
target 1714
duration 20
count 1
]
edge
[
source 1707
target 1843
duration 100
count 4
]
edge
[
source 1707
target 1719
duration 20
count 1
]
edge
[
source 1707
target 1720
duration 20
count 1
]
edge
[
source 1707
target 1723
duration 40
count 1
]
edge
[
source 1707
target 1727
duration 620
count 23
]
edge
[
source 1707
target 1731
duration 400
count 14
]
edge
[
source 1707
target 1861
duration 20
count 1
]
edge
[
source 1707
target 1737
duration 240
count 10
]
edge
[
source 1707
target 1739
duration 20
count 1
]
edge
[
source 1707
target 1744
duration 180
count 5
]
edge
[
source 1707
target 1883
duration 40
count 2
]
edge
[
source 1707
target 1722
duration 20
count 1
]
edge
[
source 1707
target 1763
duration 20
count 1
]
edge
[
source 1707
target 1765
duration 40
count 1
]
edge
[
source 1707
target 1898
duration 20
count 1
]
edge
[
source 1707
target 1427
duration 20
count 1
]
edge
[
source 1707
target 1907
duration 60
count 2
]
edge
[
source 1707
target 1780
duration 20
count 1
]
edge
[
source 1707
target 1909
duration 180
count 9
]
edge
[
source 1707
target 1782
duration 420
count 9
]
edge
[
source 1707
target 1912
duration 40
count 2
]
edge
[
source 1707
target 1855
duration 40
count 2
]
edge
[
source 1708
target 1922
duration 40
count 2
]
edge
[
source 1708
target 1795
duration 120
count 5
]
edge
[
source 1708
target 1798
duration 20
count 1
]
edge
[
source 1708
target 1801
duration 40
count 2
]
edge
[
source 1708
target 1833
duration 180
count 6
]
edge
[
source 1708
target 1426
duration 20
count 1
]
edge
[
source 1708
target 1710
duration 260
count 12
]
edge
[
source 1708
target 1761
duration 100
count 5
]
edge
[
source 1708
target 1820
duration 20
count 1
]
edge
[
source 1708
target 1822
duration 40
count 2
]
edge
[
source 1708
target 1778
duration 20
count 1
]
edge
[
source 1708
target 1838
duration 60
count 3
]
edge
[
source 1708
target 1713
duration 200
count 8
]
edge
[
source 1708
target 1458
duration 20
count 1
]
edge
[
source 1708
target 1715
duration 120
count 6
]
edge
[
source 1708
target 1718
duration 140
count 7
]
edge
[
source 1708
target 1843
duration 20
count 1
]
edge
[
source 1708
target 1722
duration 20
count 1
]
edge
[
source 1708
target 1851
duration 480
count 19
]
edge
[
source 1708
target 1852
duration 20
count 1
]
edge
[
source 1708
target 1854
duration 140
count 6
]
edge
[
source 1708
target 1855
duration 700
count 21
]
edge
[
source 1708
target 1858
duration 2460
count 68
]
edge
[
source 1708
target 1859
duration 20
count 1
]
edge
[
source 1708
target 1732
duration 480
count 17
]
edge
[
source 1708
target 1861
duration 160
count 8
]
edge
[
source 1708
target 1863
duration 320
count 12
]
edge
[
source 1708
target 1739
duration 300
count 11
]
edge
[
source 1708
target 1741
duration 100
count 3
]
edge
[
source 1708
target 1468
duration 20
count 1
]
edge
[
source 1708
target 1743
duration 2580
count 70
]
edge
[
source 1708
target 1872
duration 140
count 6
]
edge
[
source 1708
target 1748
duration 20
count 1
]
edge
[
source 1708
target 1749
duration 240
count 7
]
edge
[
source 1708
target 1498
duration 20
count 1
]
edge
[
source 1708
target 1883
duration 680
count 16
]
edge
[
source 1708
target 1759
duration 20
count 1
]
edge
[
source 1708
target 1887
duration 400
count 18
]
edge
[
source 1708
target 1889
duration 240
count 8
]
edge
[
source 1708
target 1890
duration 380
count 9
]
edge
[
source 1708
target 1763
duration 20
count 1
]
edge
[
source 1708
target 1767
duration 1180
count 21
]
edge
[
source 1708
target 1897
duration 20
count 1
]
edge
[
source 1708
target 1898
duration 100
count 5
]
edge
[
source 1708
target 1902
duration 20
count 1
]
edge
[
source 1708
target 1907
duration 140
count 3
]
edge
[
source 1708
target 1780
duration 440
count 17
]
edge
[
source 1708
target 1909
duration 60
count 3
]
edge
[
source 1708
target 1782
duration 20
count 1
]
edge
[
source 1708
target 1911
duration 200
count 9
]
edge
[
source 1708
target 1730
duration 20
count 1
]
edge
[
source 1708
target 1916
duration 420
count 11
]
edge
[
source 1708
target 1790
duration 20
count 1
]
edge
[
source 1708
target 1877
duration 60
count 3
]
edge
[
source 1709
target 1451
duration 20
count 1
]
edge
[
source 1709
target 1428
duration 20
count 1
]
edge
[
source 1709
target 1443
duration 20
count 1
]
edge
[
source 1709
target 1833
duration 60
count 1
]
edge
[
source 1709
target 1838
duration 140
count 2
]
edge
[
source 1709
target 1712
duration 140
count 6
]
edge
[
source 1709
target 1720
duration 20
count 1
]
edge
[
source 1709
target 1852
duration 20
count 1
]
edge
[
source 1709
target 1727
duration 40
count 2
]
edge
[
source 1709
target 1731
duration 200
count 8
]
edge
[
source 1709
target 1732
duration 20
count 1
]
edge
[
source 1709
target 1737
duration 60
count 3
]
edge
[
source 1709
target 1738
duration 40
count 2
]
edge
[
source 1709
target 1741
duration 40
count 2
]
edge
[
source 1709
target 1744
duration 320
count 13
]
edge
[
source 1709
target 1745
duration 80
count 3
]
edge
[
source 1709
target 1746
duration 320
count 10
]
edge
[
source 1709
target 1722
duration 20
count 1
]
edge
[
source 1709
target 1427
duration 20
count 1
]
edge
[
source 1709
target 1909
duration 40
count 1
]
edge
[
source 1710
target 1713
duration 60
count 3
]
edge
[
source 1710
target 1843
duration 40
count 2
]
edge
[
source 1710
target 1718
duration 20
count 1
]
edge
[
source 1710
target 1719
duration 40
count 1
]
edge
[
source 1710
target 1851
duration 280
count 9
]
edge
[
source 1710
target 1854
duration 60
count 3
]
edge
[
source 1710
target 1855
duration 160
count 7
]
edge
[
source 1710
target 1858
duration 20
count 1
]
edge
[
source 1710
target 1732
duration 580
count 8
]
edge
[
source 1710
target 1861
duration 60
count 2
]
edge
[
source 1710
target 1863
duration 80
count 3
]
edge
[
source 1710
target 1739
duration 40
count 2
]
edge
[
source 1710
target 1743
duration 20
count 1
]
edge
[
source 1710
target 1877
duration 40
count 1
]
edge
[
source 1710
target 1883
duration 100
count 3
]
edge
[
source 1710
target 1887
duration 40
count 2
]
edge
[
source 1710
target 1761
duration 20
count 1
]
edge
[
source 1710
target 1890
duration 480
count 16
]
edge
[
source 1710
target 1897
duration 40
count 2
]
edge
[
source 1710
target 1898
duration 20
count 1
]
edge
[
source 1710
target 1902
duration 80
count 4
]
edge
[
source 1710
target 1780
duration 40
count 2
]
edge
[
source 1710
target 1909
duration 20
count 1
]
edge
[
source 1710
target 1911
duration 60
count 3
]
edge
[
source 1710
target 1916
duration 340
count 10
]
edge
[
source 1711
target 1792
duration 100
count 4
]
edge
[
source 1711
target 1796
duration 60
count 3
]
edge
[
source 1711
target 1798
duration 140
count 4
]
edge
[
source 1711
target 1799
duration 20
count 1
]
edge
[
source 1711
target 1838
duration 20
count 1
]
edge
[
source 1711
target 1465
duration 40
count 1
]
edge
[
source 1711
target 1859
duration 20
count 1
]
edge
[
source 1711
target 1738
duration 20
count 1
]
edge
[
source 1711
target 1745
duration 20
count 1
]
edge
[
source 1711
target 1752
duration 80
count 3
]
edge
[
source 1711
target 1753
duration 40
count 1
]
edge
[
source 1711
target 1757
duration 20
count 1
]
edge
[
source 1711
target 1759
duration 460
count 16
]
edge
[
source 1711
target 1761
duration 100
count 1
]
edge
[
source 1711
target 1890
duration 20
count 1
]
edge
[
source 1711
target 1764
duration 960
count 40
]
edge
[
source 1711
target 1766
duration 20
count 1
]
edge
[
source 1711
target 1767
duration 60
count 3
]
edge
[
source 1711
target 1768
duration 260
count 11
]
edge
[
source 1711
target 1770
duration 240
count 9
]
edge
[
source 1711
target 1772
duration 60
count 3
]
edge
[
source 1711
target 1774
duration 360
count 14
]
edge
[
source 1711
target 1775
duration 140
count 6
]
edge
[
source 1711
target 1778
duration 20
count 1
]
edge
[
source 1711
target 1910
duration 20
count 1
]
edge
[
source 1711
target 1783
duration 80
count 4
]
edge
[
source 1711
target 1787
duration 300
count 13
]
edge
[
source 1711
target 1789
duration 60
count 3
]
edge
[
source 1711
target 1790
duration 380
count 17
]
edge
[
source 1712
target 1820
duration 20
count 1
]
edge
[
source 1712
target 1801
duration 200
count 4
]
edge
[
source 1712
target 1731
duration 120
count 6
]
edge
[
source 1712
target 1822
duration 220
count 10
]
edge
[
source 1712
target 1443
duration 20
count 1
]
edge
[
source 1712
target 1833
duration 20
count 1
]
edge
[
source 1712
target 1714
duration 160
count 7
]
edge
[
source 1712
target 1722
duration 60
count 3
]
edge
[
source 1712
target 1723
duration 20
count 1
]
edge
[
source 1712
target 1727
duration 320
count 10
]
edge
[
source 1712
target 1858
duration 20
count 1
]
edge
[
source 1712
target 1859
duration 100
count 4
]
edge
[
source 1712
target 1741
duration 280
count 10
]
edge
[
source 1712
target 1744
duration 340
count 13
]
edge
[
source 1712
target 1746
duration 100
count 3
]
edge
[
source 1712
target 1763
duration 20
count 1
]
edge
[
source 1712
target 1898
duration 20
count 1
]
edge
[
source 1712
target 1780
duration 20
count 1
]
edge
[
source 1713
target 1744
duration 20
count 1
]
edge
[
source 1713
target 1718
duration 180
count 9
]
edge
[
source 1713
target 1719
duration 20
count 1
]
edge
[
source 1713
target 1720
duration 40
count 2
]
edge
[
source 1713
target 1851
duration 260
count 8
]
edge
[
source 1713
target 1854
duration 160
count 5
]
edge
[
source 1713
target 1855
duration 420
count 19
]
edge
[
source 1713
target 1858
duration 180
count 6
]
edge
[
source 1713
target 1859
duration 20
count 1
]
edge
[
source 1713
target 1861
duration 160
count 5
]
edge
[
source 1713
target 1863
duration 4520
count 91
]
edge
[
source 1713
target 1739
duration 400
count 12
]
edge
[
source 1713
target 1743
duration 120
count 4
]
edge
[
source 1713
target 1872
duration 200
count 9
]
edge
[
source 1713
target 1749
duration 1740
count 46
]
edge
[
source 1713
target 1883
duration 160
count 8
]
edge
[
source 1713
target 1887
duration 20
count 1
]
edge
[
source 1713
target 1889
duration 140
count 6
]
edge
[
source 1713
target 1890
duration 440
count 11
]
edge
[
source 1713
target 1897
duration 100
count 5
]
edge
[
source 1713
target 1898
duration 40
count 2
]
edge
[
source 1713
target 1877
duration 260
count 12
]
edge
[
source 1714
target 1795
duration 800
count 30
]
edge
[
source 1714
target 1820
duration 260
count 9
]
edge
[
source 1714
target 1800
duration 100
count 5
]
edge
[
source 1714
target 1801
duration 180
count 8
]
edge
[
source 1714
target 1809
duration 40
count 2
]
edge
[
source 1714
target 1731
duration 60
count 3
]
edge
[
source 1714
target 1822
duration 780
count 28
]
edge
[
source 1714
target 1833
duration 280
count 11
]
edge
[
source 1714
target 1838
duration 180
count 8
]
edge
[
source 1714
target 1843
duration 60
count 3
]
edge
[
source 1714
target 1719
duration 420
count 14
]
edge
[
source 1714
target 1720
duration 60
count 3
]
edge
[
source 1714
target 1722
duration 80
count 3
]
edge
[
source 1714
target 1723
duration 580
count 26
]
edge
[
source 1714
target 1468
duration 40
count 2
]
edge
[
source 1714
target 1727
duration 20
count 1
]
edge
[
source 1714
target 1859
duration 260
count 11
]
edge
[
source 1714
target 1737
duration 120
count 4
]
edge
[
source 1714
target 1738
duration 120
count 4
]
edge
[
source 1714
target 1483
duration 20
count 1
]
edge
[
source 1714
target 1741
duration 80
count 4
]
edge
[
source 1714
target 1744
duration 280
count 9
]
edge
[
source 1714
target 1746
duration 100
count 4
]
edge
[
source 1714
target 1748
duration 120
count 5
]
edge
[
source 1714
target 1752
duration 20
count 1
]
edge
[
source 1714
target 1759
duration 20
count 1
]
edge
[
source 1714
target 1763
duration 180
count 8
]
edge
[
source 1714
target 1780
duration 460
count 13
]
edge
[
source 1714
target 1909
duration 40
count 2
]
edge
[
source 1714
target 1782
duration 180
count 6
]
edge
[
source 1714
target 1783
duration 20
count 1
]
edge
[
source 1715
target 1718
duration 100
count 3
]
edge
[
source 1715
target 1851
duration 80
count 3
]
edge
[
source 1715
target 1854
duration 40
count 2
]
edge
[
source 1715
target 1855
duration 60
count 3
]
edge
[
source 1715
target 1858
duration 20
count 1
]
edge
[
source 1715
target 1732
duration 20
count 1
]
edge
[
source 1715
target 1861
duration 20
count 1
]
edge
[
source 1715
target 1739
duration 3600
count 77
]
edge
[
source 1715
target 1743
duration 340
count 9
]
edge
[
source 1715
target 1872
duration 360
count 10
]
edge
[
source 1715
target 1749
duration 100
count 4
]
edge
[
source 1715
target 1883
duration 20
count 1
]
edge
[
source 1715
target 1887
duration 40
count 1
]
edge
[
source 1715
target 1889
duration 440
count 10
]
edge
[
source 1715
target 1890
duration 160
count 6
]
edge
[
source 1715
target 1897
duration 20
count 1
]
edge
[
source 1715
target 1898
duration 440
count 13
]
edge
[
source 1715
target 1877
duration 40
count 1
]
edge
[
source 1718
target 1920
duration 40
count 1
]
edge
[
source 1718
target 1911
duration 80
count 4
]
edge
[
source 1718
target 1922
duration 2020
count 36
]
edge
[
source 1718
target 1838
duration 20
count 1
]
edge
[
source 1718
target 1761
duration 60
count 3
]
edge
[
source 1718
target 1744
duration 20
count 1
]
edge
[
source 1718
target 1821
duration 20
count 1
]
edge
[
source 1718
target 1822
duration 40
count 2
]
edge
[
source 1718
target 1457
duration 20
count 1
]
edge
[
source 1718
target 1833
duration 20
count 1
]
edge
[
source 1718
target 1843
duration 120
count 5
]
edge
[
source 1718
target 1851
duration 220
count 10
]
edge
[
source 1718
target 1855
duration 920
count 27
]
edge
[
source 1718
target 1858
duration 340
count 13
]
edge
[
source 1718
target 1732
duration 140
count 6
]
edge
[
source 1718
target 1861
duration 980
count 36
]
edge
[
source 1718
target 1863
duration 120
count 5
]
edge
[
source 1718
target 1739
duration 20
count 1
]
edge
[
source 1718
target 1743
duration 280
count 11
]
edge
[
source 1718
target 1872
duration 340
count 13
]
edge
[
source 1718
target 1749
duration 580
count 26
]
edge
[
source 1718
target 1883
duration 120
count 6
]
edge
[
source 1718
target 1757
duration 20
count 1
]
edge
[
source 1718
target 1887
duration 4020
count 96
]
edge
[
source 1718
target 1889
duration 720
count 24
]
edge
[
source 1718
target 1890
duration 400
count 18
]
edge
[
source 1718
target 1768
duration 620
count 23
]
edge
[
source 1718
target 1897
duration 660
count 27
]
edge
[
source 1718
target 1898
duration 100
count 5
]
edge
[
source 1718
target 1772
duration 40
count 1
]
edge
[
source 1718
target 1902
duration 40
count 2
]
edge
[
source 1718
target 1907
duration 100
count 5
]
edge
[
source 1718
target 1780
duration 20
count 1
]
edge
[
source 1718
target 1916
duration 80
count 3
]
edge
[
source 1718
target 1790
duration 560
count 14
]
edge
[
source 1718
target 1877
duration 80
count 3
]
edge
[
source 1719
target 1922
duration 20
count 1
]
edge
[
source 1719
target 1795
duration 780
count 15
]
edge
[
source 1719
target 1820
duration 140
count 6
]
edge
[
source 1719
target 1800
duration 260
count 8
]
edge
[
source 1719
target 1801
duration 760
count 23
]
edge
[
source 1719
target 1767
duration 20
count 1
]
edge
[
source 1719
target 1809
duration 260
count 10
]
edge
[
source 1719
target 1859
duration 1200
count 46
]
edge
[
source 1719
target 1822
duration 1660
count 53
]
edge
[
source 1719
target 1443
duration 20
count 1
]
edge
[
source 1719
target 1833
duration 200
count 9
]
edge
[
source 1719
target 1837
duration 20
count 1
]
edge
[
source 1719
target 1838
duration 180
count 9
]
edge
[
source 1719
target 1843
duration 1760
count 58
]
edge
[
source 1719
target 1720
duration 2400
count 73
]
edge
[
source 1719
target 1851
duration 40
count 2
]
edge
[
source 1719
target 1468
duration 20
count 1
]
edge
[
source 1719
target 1854
duration 20
count 1
]
edge
[
source 1719
target 1727
duration 20
count 1
]
edge
[
source 1719
target 1858
duration 40
count 1
]
edge
[
source 1719
target 1731
duration 40
count 2
]
edge
[
source 1719
target 1732
duration 20
count 1
]
edge
[
source 1719
target 1861
duration 40
count 2
]
edge
[
source 1719
target 1480
duration 20
count 1
]
edge
[
source 1719
target 1737
duration 240
count 7
]
edge
[
source 1719
target 1866
duration 20
count 1
]
edge
[
source 1719
target 1783
duration 40
count 1
]
edge
[
source 1719
target 1741
duration 80
count 4
]
edge
[
source 1719
target 1746
duration 400
count 13
]
edge
[
source 1719
target 1748
duration 3640
count 105
]
edge
[
source 1719
target 1749
duration 60
count 3
]
edge
[
source 1719
target 1751
duration 40
count 2
]
edge
[
source 1719
target 1752
duration 20
count 1
]
edge
[
source 1719
target 1885
duration 20
count 1
]
edge
[
source 1719
target 1887
duration 20
count 1
]
edge
[
source 1719
target 1889
duration 1560
count 29
]
edge
[
source 1719
target 1890
duration 140
count 5
]
edge
[
source 1719
target 1763
duration 140
count 4
]
edge
[
source 1719
target 1895
duration 20
count 1
]
edge
[
source 1719
target 1768
duration 40
count 2
]
edge
[
source 1719
target 1532
duration 20
count 1
]
edge
[
source 1719
target 1778
duration 20
count 1
]
edge
[
source 1719
target 1780
duration 460
count 13
]
edge
[
source 1719
target 1909
duration 100
count 4
]
edge
[
source 1719
target 1782
duration 620
count 22
]
edge
[
source 1719
target 1911
duration 20
count 1
]
edge
[
source 1719
target 1916
duration 100
count 3
]
edge
[
source 1719
target 1790
duration 60
count 3
]
edge
[
source 1720
target 1800
duration 40
count 2
]
edge
[
source 1720
target 1801
duration 500
count 17
]
edge
[
source 1720
target 1731
duration 20
count 1
]
edge
[
source 1720
target 1809
duration 140
count 6
]
edge
[
source 1720
target 1795
duration 140
count 7
]
edge
[
source 1720
target 1820
duration 120
count 3
]
edge
[
source 1720
target 1822
duration 1060
count 34
]
edge
[
source 1720
target 1838
duration 80
count 4
]
edge
[
source 1720
target 1843
duration 140
count 7
]
edge
[
source 1720
target 1723
duration 20
count 1
]
edge
[
source 1720
target 1727
duration 220
count 3
]
edge
[
source 1720
target 1859
duration 320
count 12
]
edge
[
source 1720
target 1737
duration 940
count 32
]
edge
[
source 1720
target 1738
duration 240
count 7
]
edge
[
source 1720
target 1741
duration 40
count 2
]
edge
[
source 1720
target 1746
duration 260
count 10
]
edge
[
source 1720
target 1748
duration 1320
count 40
]
edge
[
source 1720
target 1722
duration 40
count 2
]
edge
[
source 1720
target 1503
duration 20
count 1
]
edge
[
source 1720
target 1889
duration 460
count 15
]
edge
[
source 1720
target 1890
duration 40
count 2
]
edge
[
source 1720
target 1763
duration 80
count 3
]
edge
[
source 1720
target 1768
duration 60
count 2
]
edge
[
source 1720
target 1780
duration 640
count 22
]
edge
[
source 1720
target 1909
duration 420
count 14
]
edge
[
source 1720
target 1782
duration 100
count 5
]
edge
[
source 1720
target 1912
duration 20
count 1
]
edge
[
source 1720
target 1855
duration 60
count 2
]
edge
[
source 1720
target 1790
duration 40
count 1
]
edge
[
source 1722
target 1920
duration 20
count 1
]
edge
[
source 1722
target 1790
duration 20
count 1
]
edge
[
source 1722
target 1795
duration 2340
count 60
]
edge
[
source 1722
target 1800
duration 400
count 9
]
edge
[
source 1722
target 1801
duration 280
count 9
]
edge
[
source 1722
target 1809
duration 100
count 3
]
edge
[
source 1722
target 1820
duration 240
count 8
]
edge
[
source 1722
target 1822
duration 120
count 5
]
edge
[
source 1722
target 1833
duration 1120
count 40
]
edge
[
source 1722
target 1838
duration 300
count 12
]
edge
[
source 1722
target 1843
duration 120
count 4
]
edge
[
source 1722
target 1723
duration 40
count 2
]
edge
[
source 1722
target 1855
duration 40
count 2
]
edge
[
source 1722
target 1859
duration 460
count 16
]
edge
[
source 1722
target 1737
duration 40
count 1
]
edge
[
source 1722
target 1738
duration 1200
count 18
]
edge
[
source 1722
target 1741
duration 80
count 2
]
edge
[
source 1722
target 1486
duration 20
count 1
]
edge
[
source 1722
target 1851
duration 400
count 13
]
edge
[
source 1722
target 1746
duration 500
count 17
]
edge
[
source 1722
target 1748
duration 80
count 4
]
edge
[
source 1722
target 1759
duration 20
count 1
]
edge
[
source 1722
target 1887
duration 20
count 1
]
edge
[
source 1722
target 1761
duration 20
count 1
]
edge
[
source 1722
target 1890
duration 20
count 1
]
edge
[
source 1722
target 1763
duration 440
count 17
]
edge
[
source 1722
target 1764
duration 20
count 1
]
edge
[
source 1722
target 1765
duration 20
count 1
]
edge
[
source 1722
target 1907
duration 20
count 1
]
edge
[
source 1722
target 1780
duration 180
count 8
]
edge
[
source 1722
target 1909
duration 260
count 11
]
edge
[
source 1722
target 1782
duration 80
count 4
]
edge
[
source 1722
target 1911
duration 20
count 1
]
edge
[
source 1722
target 1912
duration 20
count 1
]
edge
[
source 1722
target 1789
duration 20
count 1
]
edge
[
source 1723
target 1795
duration 40
count 2
]
edge
[
source 1723
target 1800
duration 20
count 1
]
edge
[
source 1723
target 1801
duration 40
count 2
]
edge
[
source 1723
target 1809
duration 820
count 30
]
edge
[
source 1723
target 1731
duration 20
count 1
]
edge
[
source 1723
target 1822
duration 240
count 9
]
edge
[
source 1723
target 1833
duration 120
count 6
]
edge
[
source 1723
target 1838
duration 20
count 1
]
edge
[
source 1723
target 1757
duration 20
count 1
]
edge
[
source 1723
target 1727
duration 20
count 1
]
edge
[
source 1723
target 1859
duration 180
count 5
]
edge
[
source 1723
target 1737
duration 80
count 4
]
edge
[
source 1723
target 1741
duration 340
count 15
]
edge
[
source 1723
target 1744
duration 140
count 6
]
edge
[
source 1723
target 1746
duration 160
count 6
]
edge
[
source 1723
target 1748
duration 60
count 3
]
edge
[
source 1723
target 1763
duration 20
count 1
]
edge
[
source 1723
target 1780
duration 100
count 4
]
edge
[
source 1723
target 1909
duration 100
count 5
]
edge
[
source 1723
target 1782
duration 220
count 9
]
edge
[
source 1727
target 1859
duration 60
count 2
]
edge
[
source 1727
target 1795
duration 80
count 4
]
edge
[
source 1727
target 1796
duration 40
count 1
]
edge
[
source 1727
target 1820
duration 20
count 1
]
edge
[
source 1727
target 1822
duration 80
count 4
]
edge
[
source 1727
target 1838
duration 400
count 13
]
edge
[
source 1727
target 1843
duration 40
count 2
]
edge
[
source 1727
target 1731
duration 1320
count 44
]
edge
[
source 1727
target 1479
duration 20
count 1
]
edge
[
source 1727
target 1737
duration 60
count 2
]
edge
[
source 1727
target 1738
duration 20
count 1
]
edge
[
source 1727
target 1741
duration 20
count 1
]
edge
[
source 1727
target 1744
duration 260
count 9
]
edge
[
source 1727
target 1748
duration 20
count 1
]
edge
[
source 1727
target 1493
duration 20
count 1
]
edge
[
source 1727
target 1495
duration 20
count 1
]
edge
[
source 1727
target 1501
duration 20
count 1
]
edge
[
source 1727
target 1763
duration 20
count 1
]
edge
[
source 1727
target 1765
duration 20
count 1
]
edge
[
source 1727
target 1898
duration 20
count 1
]
edge
[
source 1727
target 1780
duration 40
count 2
]
edge
[
source 1727
target 1909
duration 100
count 5
]
edge
[
source 1727
target 1782
duration 20
count 1
]
edge
[
source 1727
target 1833
duration 20
count 1
]
edge
[
source 1727
target 1916
duration 20
count 1
]
edge
[
source 1730
target 1797
duration 680
count 13
]
edge
[
source 1730
target 1798
duration 20
count 1
]
edge
[
source 1730
target 1757
duration 20
count 1
]
edge
[
source 1730
target 1426
duration 20
count 1
]
edge
[
source 1730
target 1428
duration 20
count 1
]
edge
[
source 1730
target 1815
duration 3200
count 67
]
edge
[
source 1730
target 1732
duration 20
count 1
]
edge
[
source 1730
target 1434
duration 20
count 1
]
edge
[
source 1730
target 1822
duration 20
count 1
]
edge
[
source 1730
target 1443
duration 40
count 2
]
edge
[
source 1730
target 1439
duration 120
count 3
]
edge
[
source 1730
target 1837
duration 220
count 9
]
edge
[
source 1730
target 1458
duration 20
count 1
]
edge
[
source 1730
target 1801
duration 20
count 1
]
edge
[
source 1730
target 1465
duration 140
count 7
]
edge
[
source 1730
target 1851
duration 140
count 5
]
edge
[
source 1730
target 1852
duration 20
count 1
]
edge
[
source 1730
target 1482
duration 60
count 2
]
edge
[
source 1730
target 1525
duration 80
count 4
]
edge
[
source 1730
target 1857
duration 20
count 1
]
edge
[
source 1730
target 1477
duration 220
count 6
]
edge
[
source 1730
target 1912
duration 100
count 4
]
edge
[
source 1730
target 1480
duration 140
count 6
]
edge
[
source 1730
target 1866
duration 140
count 6
]
edge
[
source 1730
target 1847
duration 400
count 9
]
edge
[
source 1730
target 1528
duration 240
count 8
]
edge
[
source 1730
target 1748
duration 20
count 1
]
edge
[
source 1730
target 1495
duration 20
count 1
]
edge
[
source 1730
target 1498
duration 20
count 1
]
edge
[
source 1730
target 1500
duration 40
count 2
]
edge
[
source 1730
target 1885
duration 80
count 4
]
edge
[
source 1730
target 1502
duration 20
count 1
]
edge
[
source 1730
target 1503
duration 1140
count 41
]
edge
[
source 1730
target 1504
duration 120
count 5
]
edge
[
source 1730
target 1764
duration 20
count 1
]
edge
[
source 1730
target 1765
duration 140
count 6
]
edge
[
source 1730
target 1902
duration 20
count 1
]
edge
[
source 1730
target 1519
duration 20
count 1
]
edge
[
source 1730
target 1520
duration 40
count 1
]
edge
[
source 1730
target 1906
duration 40
count 1
]
edge
[
source 1730
target 1779
duration 20
count 1
]
edge
[
source 1730
target 1524
duration 40
count 2
]
edge
[
source 1730
target 1909
duration 20
count 1
]
edge
[
source 1730
target 1855
duration 20
count 1
]
edge
[
source 1730
target 1532
duration 100
count 5
]
edge
[
source 1730
target 1533
duration 380
count 14
]
edge
[
source 1730
target 1790
duration 20
count 1
]
edge
[
source 1731
target 1801
duration 40
count 2
]
edge
[
source 1731
target 1822
duration 180
count 7
]
edge
[
source 1731
target 1833
duration 60
count 2
]
edge
[
source 1731
target 1838
duration 20
count 1
]
edge
[
source 1731
target 1843
duration 300
count 10
]
edge
[
source 1731
target 1468
duration 20
count 1
]
edge
[
source 1731
target 1859
duration 40
count 2
]
edge
[
source 1731
target 1737
duration 20
count 1
]
edge
[
source 1731
target 1483
duration 20
count 1
]
edge
[
source 1731
target 1741
duration 40
count 2
]
edge
[
source 1731
target 1744
duration 580
count 23
]
edge
[
source 1731
target 1746
duration 20
count 1
]
edge
[
source 1731
target 1748
duration 20
count 1
]
edge
[
source 1731
target 1763
duration 140
count 6
]
edge
[
source 1731
target 1516
duration 20
count 1
]
edge
[
source 1731
target 1778
duration 20
count 1
]
edge
[
source 1731
target 1780
duration 60
count 3
]
edge
[
source 1732
target 1922
duration 100
count 4
]
edge
[
source 1732
target 1795
duration 20
count 1
]
edge
[
source 1732
target 1809
duration 20
count 1
]
edge
[
source 1732
target 1838
duration 60
count 3
]
edge
[
source 1732
target 1761
duration 40
count 2
]
edge
[
source 1732
target 1851
duration 40
count 1
]
edge
[
source 1732
target 1854
duration 20
count 1
]
edge
[
source 1732
target 1855
duration 540
count 19
]
edge
[
source 1732
target 1858
duration 60
count 3
]
edge
[
source 1732
target 1861
duration 100
count 4
]
edge
[
source 1732
target 1863
duration 60
count 3
]
edge
[
source 1732
target 1866
duration 40
count 1
]
edge
[
source 1732
target 1741
duration 20
count 1
]
edge
[
source 1732
target 1743
duration 20
count 1
]
edge
[
source 1732
target 1748
duration 40
count 2
]
edge
[
source 1732
target 1877
duration 20
count 1
]
edge
[
source 1732
target 1883
duration 200
count 8
]
edge
[
source 1732
target 1757
duration 20
count 1
]
edge
[
source 1732
target 1759
duration 20
count 1
]
edge
[
source 1732
target 1887
duration 320
count 11
]
edge
[
source 1732
target 1889
duration 680
count 27
]
edge
[
source 1732
target 1890
duration 2580
count 32
]
edge
[
source 1732
target 1768
duration 20
count 1
]
edge
[
source 1732
target 1897
duration 1280
count 54
]
edge
[
source 1732
target 1898
duration 220
count 8
]
edge
[
source 1732
target 1902
duration 20
count 1
]
edge
[
source 1732
target 1907
duration 40
count 2
]
edge
[
source 1732
target 1780
duration 100
count 2
]
edge
[
source 1732
target 1911
duration 180
count 1
]
edge
[
source 1732
target 1916
duration 440
count 18
]
edge
[
source 1732
target 1749
duration 80
count 4
]
edge
[
source 1737
target 1801
duration 40
count 2
]
edge
[
source 1737
target 1809
duration 140
count 5
]
edge
[
source 1737
target 1795
duration 160
count 5
]
edge
[
source 1737
target 1859
duration 100
count 5
]
edge
[
source 1737
target 1820
duration 120
count 6
]
edge
[
source 1737
target 1822
duration 300
count 12
]
edge
[
source 1737
target 1838
duration 100
count 4
]
edge
[
source 1737
target 1843
duration 600
count 21
]
edge
[
source 1737
target 1738
duration 960
count 30
]
edge
[
source 1737
target 1741
duration 260
count 9
]
edge
[
source 1737
target 1744
duration 120
count 3
]
edge
[
source 1737
target 1746
duration 280
count 9
]
edge
[
source 1737
target 1748
duration 300
count 7
]
edge
[
source 1737
target 1751
duration 20
count 1
]
edge
[
source 1737
target 1759
duration 20
count 1
]
edge
[
source 1737
target 1763
duration 220
count 8
]
edge
[
source 1737
target 1780
duration 860
count 28
]
edge
[
source 1737
target 1909
duration 1600
count 58
]
edge
[
source 1737
target 1782
duration 160
count 4
]
edge
[
source 1737
target 1833
duration 120
count 5
]
edge
[
source 1738
target 1795
duration 220
count 9
]
edge
[
source 1738
target 1800
duration 520
count 12
]
edge
[
source 1738
target 1801
duration 100
count 5
]
edge
[
source 1738
target 1809
duration 100
count 5
]
edge
[
source 1738
target 1820
duration 60
count 3
]
edge
[
source 1738
target 1822
duration 220
count 8
]
edge
[
source 1738
target 1833
duration 720
count 9
]
edge
[
source 1738
target 1838
duration 20
count 1
]
edge
[
source 1738
target 1843
duration 20
count 1
]
edge
[
source 1738
target 1859
duration 460
count 15
]
edge
[
source 1738
target 1741
duration 140
count 6
]
edge
[
source 1738
target 1744
duration 180
count 8
]
edge
[
source 1738
target 1746
duration 340
count 12
]
edge
[
source 1738
target 1748
duration 80
count 3
]
edge
[
source 1738
target 1763
duration 40
count 2
]
edge
[
source 1738
target 1768
duration 20
count 1
]
edge
[
source 1738
target 1779
duration 20
count 1
]
edge
[
source 1738
target 1780
duration 1400
count 45
]
edge
[
source 1738
target 1909
duration 800
count 32
]
edge
[
source 1738
target 1782
duration 40
count 2
]
edge
[
source 1738
target 1783
duration 20
count 1
]
edge
[
source 1738
target 1787
duration 20
count 1
]
edge
[
source 1738
target 1789
duration 40
count 2
]
edge
[
source 1739
target 1851
duration 240
count 11
]
edge
[
source 1739
target 1854
duration 80
count 3
]
edge
[
source 1739
target 1855
duration 120
count 6
]
edge
[
source 1739
target 1858
duration 220
count 8
]
edge
[
source 1739
target 1861
duration 20
count 1
]
edge
[
source 1739
target 1743
duration 480
count 11
]
edge
[
source 1739
target 1872
duration 1560
count 41
]
edge
[
source 1739
target 1877
duration 800
count 39
]
edge
[
source 1739
target 1883
duration 20
count 1
]
edge
[
source 1739
target 1887
duration 160
count 8
]
edge
[
source 1739
target 1889
duration 180
count 6
]
edge
[
source 1739
target 1890
duration 140
count 7
]
edge
[
source 1739
target 1897
duration 80
count 4
]
edge
[
source 1739
target 1898
duration 60
count 3
]
edge
[
source 1741
target 1795
duration 340
count 11
]
edge
[
source 1741
target 1801
duration 380
count 16
]
edge
[
source 1741
target 1809
duration 340
count 15
]
edge
[
source 1741
target 1822
duration 180
count 9
]
edge
[
source 1741
target 1820
duration 60
count 3
]
edge
[
source 1741
target 1838
duration 280
count 9
]
edge
[
source 1741
target 1843
duration 80
count 4
]
edge
[
source 1741
target 1859
duration 320
count 15
]
edge
[
source 1741
target 1744
duration 160
count 7
]
edge
[
source 1741
target 1746
duration 100
count 5
]
edge
[
source 1741
target 1748
duration 20
count 1
]
edge
[
source 1741
target 1763
duration 600
count 20
]
edge
[
source 1741
target 1766
duration 20
count 1
]
edge
[
source 1741
target 1780
duration 160
count 8
]
edge
[
source 1741
target 1909
duration 400
count 15
]
edge
[
source 1741
target 1782
duration 20
count 1
]
edge
[
source 1741
target 1833
duration 40
count 2
]
edge
[
source 1743
target 1838
duration 20
count 1
]
edge
[
source 1743
target 1851
duration 380
count 13
]
edge
[
source 1743
target 1854
duration 80
count 2
]
edge
[
source 1743
target 1855
duration 120
count 6
]
edge
[
source 1743
target 1858
duration 80
count 4
]
edge
[
source 1743
target 1861
duration 400
count 15
]
edge
[
source 1743
target 1863
duration 40
count 2
]
edge
[
source 1743
target 1872
duration 440
count 16
]
edge
[
source 1743
target 1749
duration 60
count 2
]
edge
[
source 1743
target 1883
duration 140
count 6
]
edge
[
source 1743
target 1887
duration 880
count 26
]
edge
[
source 1743
target 1889
duration 220
count 6
]
edge
[
source 1743
target 1890
duration 140
count 6
]
edge
[
source 1743
target 1897
duration 460
count 10
]
edge
[
source 1743
target 1898
duration 440
count 7
]
edge
[
source 1743
target 1877
duration 60
count 2
]
edge
[
source 1744
target 1859
duration 20
count 1
]
edge
[
source 1744
target 1800
duration 20
count 1
]
edge
[
source 1744
target 1801
duration 40
count 2
]
edge
[
source 1744
target 1822
duration 140
count 6
]
edge
[
source 1744
target 1833
duration 40
count 2
]
edge
[
source 1744
target 1843
duration 40
count 2
]
edge
[
source 1744
target 1854
duration 20
count 1
]
edge
[
source 1744
target 1861
duration 20
count 1
]
edge
[
source 1744
target 1763
duration 120
count 6
]
edge
[
source 1744
target 1765
duration 20
count 1
]
edge
[
source 1744
target 1766
duration 40
count 1
]
edge
[
source 1744
target 1898
duration 20
count 1
]
edge
[
source 1744
target 1779
duration 20
count 1
]
edge
[
source 1744
target 1780
duration 200
count 6
]
edge
[
source 1744
target 1783
duration 20
count 1
]
edge
[
source 1744
target 1912
duration 40
count 1
]
edge
[
source 1745
target 1920
duration 200
count 10
]
edge
[
source 1745
target 1796
duration 40
count 2
]
edge
[
source 1745
target 1427
duration 20
count 1
]
edge
[
source 1745
target 1822
duration 20
count 1
]
edge
[
source 1745
target 1798
duration 20
count 1
]
edge
[
source 1745
target 1838
duration 20
count 1
]
edge
[
source 1745
target 1843
duration 20
count 1
]
edge
[
source 1745
target 1852
duration 440
count 3
]
edge
[
source 1745
target 1477
duration 20
count 1
]
edge
[
source 1745
target 1912
duration 1460
count 60
]
edge
[
source 1745
target 1753
duration 40
count 1
]
edge
[
source 1745
target 1757
duration 20
count 1
]
edge
[
source 1745
target 1887
duration 20
count 1
]
edge
[
source 1745
target 1765
duration 380
count 16
]
edge
[
source 1745
target 1768
duration 80
count 2
]
edge
[
source 1745
target 1520
duration 20
count 1
]
edge
[
source 1745
target 1779
duration 120
count 4
]
edge
[
source 1745
target 1908
duration 500
count 19
]
edge
[
source 1745
target 1783
duration 280
count 11
]
edge
[
source 1745
target 1787
duration 120
count 4
]
edge
[
source 1745
target 1790
duration 40
count 1
]
edge
[
source 1746
target 1795
duration 360
count 14
]
edge
[
source 1746
target 1800
duration 240
count 11
]
edge
[
source 1746
target 1801
duration 260
count 9
]
edge
[
source 1746
target 1809
duration 200
count 7
]
edge
[
source 1746
target 1820
duration 220
count 7
]
edge
[
source 1746
target 1822
duration 260
count 9
]
edge
[
source 1746
target 1833
duration 720
count 17
]
edge
[
source 1746
target 1838
duration 1220
count 17
]
edge
[
source 1746
target 1843
duration 260
count 10
]
edge
[
source 1746
target 1859
duration 360
count 11
]
edge
[
source 1746
target 1748
duration 180
count 9
]
edge
[
source 1746
target 1763
duration 720
count 27
]
edge
[
source 1746
target 1780
duration 200
count 7
]
edge
[
source 1746
target 1909
duration 80
count 4
]
edge
[
source 1746
target 1782
duration 200
count 8
]
edge
[
source 1748
target 1790
duration 60
count 3
]
edge
[
source 1748
target 1795
duration 320
count 12
]
edge
[
source 1748
target 1800
duration 80
count 4
]
edge
[
source 1748
target 1801
duration 340
count 11
]
edge
[
source 1748
target 1809
duration 160
count 7
]
edge
[
source 1748
target 1820
duration 440
count 20
]
edge
[
source 1748
target 1822
duration 1400
count 45
]
edge
[
source 1748
target 1833
duration 660
count 24
]
edge
[
source 1748
target 1838
duration 120
count 6
]
edge
[
source 1748
target 1843
duration 240
count 11
]
edge
[
source 1748
target 1866
duration 20
count 1
]
edge
[
source 1748
target 1854
duration 20
count 1
]
edge
[
source 1748
target 1859
duration 280
count 12
]
edge
[
source 1748
target 1861
duration 20
count 1
]
edge
[
source 1748
target 1835
duration 20
count 1
]
edge
[
source 1748
target 1486
duration 20
count 1
]
edge
[
source 1748
target 1851
duration 40
count 1
]
edge
[
source 1748
target 1889
duration 760
count 20
]
edge
[
source 1748
target 1763
duration 80
count 4
]
edge
[
source 1748
target 1767
duration 20
count 1
]
edge
[
source 1748
target 1768
duration 80
count 3
]
edge
[
source 1748
target 1898
duration 20
count 1
]
edge
[
source 1748
target 1902
duration 80
count 4
]
edge
[
source 1748
target 1907
duration 20
count 1
]
edge
[
source 1748
target 1780
duration 80
count 3
]
edge
[
source 1748
target 1909
duration 40
count 2
]
edge
[
source 1748
target 1782
duration 800
count 27
]
edge
[
source 1748
target 1783
duration 20
count 1
]
edge
[
source 1748
target 1855
duration 60
count 3
]
edge
[
source 1748
target 1916
duration 20
count 1
]
edge
[
source 1749
target 1801
duration 20
count 1
]
edge
[
source 1749
target 1922
duration 100
count 5
]
edge
[
source 1749
target 1426
duration 40
count 2
]
edge
[
source 1749
target 1761
duration 620
count 21
]
edge
[
source 1749
target 1437
duration 20
count 1
]
edge
[
source 1749
target 1477
duration 20
count 1
]
edge
[
source 1749
target 1778
duration 80
count 1
]
edge
[
source 1749
target 1838
duration 20
count 1
]
edge
[
source 1749
target 1843
duration 20
count 1
]
edge
[
source 1749
target 1851
duration 140
count 5
]
edge
[
source 1749
target 1468
duration 20
count 1
]
edge
[
source 1749
target 1854
duration 60
count 3
]
edge
[
source 1749
target 1855
duration 160
count 6
]
edge
[
source 1749
target 1858
duration 1840
count 41
]
edge
[
source 1749
target 1861
duration 240
count 10
]
edge
[
source 1749
target 1863
duration 2040
count 49
]
edge
[
source 1749
target 1866
duration 20
count 1
]
edge
[
source 1749
target 1872
duration 280
count 9
]
edge
[
source 1749
target 1439
duration 20
count 1
]
edge
[
source 1749
target 1877
duration 560
count 13
]
edge
[
source 1749
target 1883
duration 960
count 35
]
edge
[
source 1749
target 1757
duration 140
count 3
]
edge
[
source 1749
target 1887
duration 340
count 14
]
edge
[
source 1749
target 1889
duration 320
count 11
]
edge
[
source 1749
target 1890
duration 440
count 12
]
edge
[
source 1749
target 1763
duration 20
count 1
]
edge
[
source 1749
target 1768
duration 20
count 1
]
edge
[
source 1749
target 1897
duration 80
count 3
]
edge
[
source 1749
target 1898
duration 640
count 25
]
edge
[
source 1749
target 1902
duration 40
count 2
]
edge
[
source 1749
target 1907
duration 3280
count 51
]
edge
[
source 1749
target 1780
duration 20
count 1
]
edge
[
source 1749
target 1782
duration 60
count 3
]
edge
[
source 1749
target 1789
duration 20
count 1
]
edge
[
source 1749
target 1790
duration 40
count 1
]
edge
[
source 1750
target 1824
duration 40
count 2
]
edge
[
source 1750
target 1441
duration 240
count 6
]
edge
[
source 1750
target 1443
duration 180
count 9
]
edge
[
source 1750
target 1480
duration 60
count 3
]
edge
[
source 1750
target 1482
duration 120
count 4
]
edge
[
source 1750
target 1475
duration 60
count 3
]
edge
[
source 1750
target 1426
duration 240
count 10
]
edge
[
source 1750
target 1427
duration 140
count 7
]
edge
[
source 1750
target 1439
duration 160
count 5
]
edge
[
source 1750
target 1429
duration 100
count 5
]
edge
[
source 1750
target 1431
duration 140
count 7
]
edge
[
source 1750
target 1486
duration 80
count 3
]
edge
[
source 1750
target 1465
duration 20
count 1
]
edge
[
source 1750
target 1434
duration 60
count 3
]
edge
[
source 1750
target 1435
duration 380
count 15
]
edge
[
source 1750
target 1437
duration 120
count 5
]
edge
[
source 1750
target 1471
duration 260
count 12
]
edge
[
source 1751
target 1451
duration 20
count 1
]
edge
[
source 1751
target 1801
duration 60
count 2
]
edge
[
source 1751
target 1837
duration 140
count 4
]
edge
[
source 1751
target 1426
duration 60
count 3
]
edge
[
source 1751
target 1765
duration 80
count 3
]
edge
[
source 1751
target 1428
duration 40
count 2
]
edge
[
source 1751
target 1434
duration 20
count 1
]
edge
[
source 1751
target 1821
duration 20
count 1
]
edge
[
source 1751
target 1443
duration 60
count 2
]
edge
[
source 1751
target 1885
duration 40
count 1
]
edge
[
source 1751
target 1833
duration 160
count 4
]
edge
[
source 1751
target 1835
duration 20
count 1
]
edge
[
source 1751
target 1452
duration 360
count 15
]
edge
[
source 1751
target 1453
duration 620
count 16
]
edge
[
source 1751
target 1437
duration 20
count 1
]
edge
[
source 1751
target 1457
duration 800
count 25
]
edge
[
source 1751
target 1458
duration 580
count 22
]
edge
[
source 1751
target 1459
duration 20
count 1
]
edge
[
source 1751
target 1461
duration 1040
count 25
]
edge
[
source 1751
target 1465
duration 20
count 1
]
edge
[
source 1751
target 1468
duration 220
count 10
]
edge
[
source 1751
target 1866
duration 20
count 1
]
edge
[
source 1751
target 1857
duration 40
count 2
]
edge
[
source 1751
target 1858
duration 20
count 1
]
edge
[
source 1751
target 1477
duration 300
count 10
]
edge
[
source 1751
target 1479
duration 200
count 7
]
edge
[
source 1751
target 1480
duration 20
count 1
]
edge
[
source 1751
target 1482
duration 180
count 8
]
edge
[
source 1751
target 1483
duration 80
count 3
]
edge
[
source 1751
target 1486
duration 100
count 5
]
edge
[
source 1751
target 1493
duration 160
count 7
]
edge
[
source 1751
target 1495
duration 320
count 9
]
edge
[
source 1751
target 1498
duration 120
count 5
]
edge
[
source 1751
target 1501
duration 320
count 13
]
edge
[
source 1751
target 1502
duration 180
count 9
]
edge
[
source 1751
target 1503
duration 60
count 2
]
edge
[
source 1751
target 1516
duration 580
count 16
]
edge
[
source 1751
target 1520
duration 140
count 4
]
edge
[
source 1751
target 1522
duration 80
count 4
]
edge
[
source 1751
target 1427
duration 20
count 1
]
edge
[
source 1751
target 1780
duration 180
count 3
]
edge
[
source 1751
target 1909
duration 60
count 2
]
edge
[
source 1751
target 1782
duration 20
count 1
]
edge
[
source 1751
target 1912
duration 20
count 1
]
edge
[
source 1751
target 1532
duration 40
count 2
]
edge
[
source 1752
target 1792
duration 220
count 9
]
edge
[
source 1752
target 1796
duration 100
count 5
]
edge
[
source 1752
target 1798
duration 80
count 3
]
edge
[
source 1752
target 1799
duration 180
count 5
]
edge
[
source 1752
target 1775
duration 20
count 1
]
edge
[
source 1752
target 1822
duration 100
count 4
]
edge
[
source 1752
target 1833
duration 40
count 1
]
edge
[
source 1752
target 1911
duration 20
count 1
]
edge
[
source 1752
target 1753
duration 100
count 2
]
edge
[
source 1752
target 1757
duration 160
count 6
]
edge
[
source 1752
target 1759
duration 140
count 7
]
edge
[
source 1752
target 1760
duration 40
count 2
]
edge
[
source 1752
target 1761
duration 200
count 8
]
edge
[
source 1752
target 1763
duration 20
count 1
]
edge
[
source 1752
target 1764
duration 120
count 5
]
edge
[
source 1752
target 1766
duration 200
count 10
]
edge
[
source 1752
target 1767
duration 160
count 6
]
edge
[
source 1752
target 1768
duration 980
count 21
]
edge
[
source 1752
target 1770
duration 60
count 3
]
edge
[
source 1752
target 1772
duration 100
count 3
]
edge
[
source 1752
target 1774
duration 80
count 3
]
edge
[
source 1752
target 1789
duration 120
count 5
]
edge
[
source 1752
target 1778
duration 600
count 16
]
edge
[
source 1752
target 1909
duration 20
count 1
]
edge
[
source 1752
target 1783
duration 500
count 17
]
edge
[
source 1752
target 1787
duration 800
count 26
]
edge
[
source 1752
target 1917
duration 20
count 1
]
edge
[
source 1753
target 1792
duration 160
count 6
]
edge
[
source 1753
target 1920
duration 20
count 1
]
edge
[
source 1753
target 1798
duration 80
count 3
]
edge
[
source 1753
target 1821
duration 20
count 1
]
edge
[
source 1753
target 1857
duration 20
count 1
]
edge
[
source 1753
target 1480
duration 20
count 1
]
edge
[
source 1753
target 1757
duration 100
count 5
]
edge
[
source 1753
target 1759
duration 20
count 1
]
edge
[
source 1753
target 1760
duration 20
count 1
]
edge
[
source 1753
target 1761
duration 340
count 13
]
edge
[
source 1753
target 1767
duration 40
count 2
]
edge
[
source 1753
target 1768
duration 120
count 4
]
edge
[
source 1753
target 1772
duration 20
count 1
]
edge
[
source 1753
target 1778
duration 20
count 1
]
edge
[
source 1753
target 1908
duration 60
count 3
]
edge
[
source 1753
target 1783
duration 80
count 4
]
edge
[
source 1753
target 1787
duration 20
count 1
]
edge
[
source 1753
target 1789
duration 60
count 3
]
edge
[
source 1753
target 1790
duration 100
count 3
]
edge
[
source 1757
target 1792
duration 1940
count 62
]
edge
[
source 1757
target 1920
duration 40
count 2
]
edge
[
source 1757
target 1922
duration 20
count 1
]
edge
[
source 1757
target 1795
duration 60
count 3
]
edge
[
source 1757
target 1796
duration 440
count 11
]
edge
[
source 1757
target 1798
duration 140
count 7
]
edge
[
source 1757
target 1799
duration 180
count 9
]
edge
[
source 1757
target 1809
duration 40
count 2
]
edge
[
source 1757
target 1902
duration 20
count 1
]
edge
[
source 1757
target 1437
duration 20
count 1
]
edge
[
source 1757
target 1822
duration 40
count 2
]
edge
[
source 1757
target 1443
duration 20
count 1
]
edge
[
source 1757
target 1479
duration 40
count 1
]
edge
[
source 1757
target 1833
duration 140
count 7
]
edge
[
source 1757
target 1838
duration 20
count 1
]
edge
[
source 1757
target 1843
duration 20
count 1
]
edge
[
source 1757
target 1801
duration 20
count 1
]
edge
[
source 1757
target 1851
duration 460
count 15
]
edge
[
source 1757
target 1858
duration 20
count 1
]
edge
[
source 1757
target 1859
duration 960
count 18
]
edge
[
source 1757
target 1861
duration 20
count 1
]
edge
[
source 1757
target 1889
duration 20
count 1
]
edge
[
source 1757
target 1480
duration 20
count 1
]
edge
[
source 1757
target 1770
duration 20
count 1
]
edge
[
source 1757
target 1501
duration 20
count 1
]
edge
[
source 1757
target 1759
duration 220
count 10
]
edge
[
source 1757
target 1760
duration 200
count 7
]
edge
[
source 1757
target 1761
duration 1040
count 43
]
edge
[
source 1757
target 1887
duration 360
count 9
]
edge
[
source 1757
target 1763
duration 140
count 5
]
edge
[
source 1757
target 1764
duration 100
count 5
]
edge
[
source 1757
target 1765
duration 40
count 1
]
edge
[
source 1757
target 1766
duration 60
count 2
]
edge
[
source 1757
target 1767
duration 660
count 27
]
edge
[
source 1757
target 1768
duration 1100
count 39
]
edge
[
source 1757
target 1898
duration 40
count 1
]
edge
[
source 1757
target 1772
duration 40
count 2
]
edge
[
source 1757
target 1774
duration 80
count 4
]
edge
[
source 1757
target 1775
duration 80
count 4
]
edge
[
source 1757
target 1778
duration 280
count 9
]
edge
[
source 1757
target 1907
duration 60
count 2
]
edge
[
source 1757
target 1780
duration 80
count 3
]
edge
[
source 1757
target 1909
duration 220
count 7
]
edge
[
source 1757
target 1782
duration 20
count 1
]
edge
[
source 1757
target 1783
duration 340
count 10
]
edge
[
source 1757
target 1787
duration 20
count 1
]
edge
[
source 1757
target 1916
duration 180
count 5
]
edge
[
source 1757
target 1789
duration 1920
count 47
]
edge
[
source 1757
target 1790
duration 60
count 3
]
edge
[
source 1759
target 1792
duration 280
count 12
]
edge
[
source 1759
target 1796
duration 220
count 6
]
edge
[
source 1759
target 1798
duration 360
count 8
]
edge
[
source 1759
target 1799
duration 160
count 5
]
edge
[
source 1759
target 1822
duration 60
count 3
]
edge
[
source 1759
target 1833
duration 80
count 3
]
edge
[
source 1759
target 1836
duration 20
count 1
]
edge
[
source 1759
target 1859
duration 60
count 2
]
edge
[
source 1759
target 1480
duration 20
count 1
]
edge
[
source 1759
target 1887
duration 20
count 1
]
edge
[
source 1759
target 1888
duration 20
count 1
]
edge
[
source 1759
target 1761
duration 160
count 6
]
edge
[
source 1759
target 1764
duration 1140
count 37
]
edge
[
source 1759
target 1766
duration 160
count 8
]
edge
[
source 1759
target 1767
duration 760
count 19
]
edge
[
source 1759
target 1768
duration 160
count 8
]
edge
[
source 1759
target 1770
duration 800
count 31
]
edge
[
source 1759
target 1895
duration 20
count 1
]
edge
[
source 1759
target 1772
duration 120
count 5
]
edge
[
source 1759
target 1774
duration 160
count 7
]
edge
[
source 1759
target 1775
duration 900
count 28
]
edge
[
source 1759
target 1778
duration 120
count 3
]
edge
[
source 1759
target 1907
duration 20
count 1
]
edge
[
source 1759
target 1783
duration 200
count 8
]
edge
[
source 1759
target 1787
duration 160
count 8
]
edge
[
source 1759
target 1789
duration 460
count 15
]
edge
[
source 1759
target 1790
duration 880
count 31
]
edge
[
source 1760
target 1792
duration 40
count 2
]
edge
[
source 1760
target 1789
duration 20
count 1
]
edge
[
source 1760
target 1764
duration 40
count 2
]
edge
[
source 1760
target 1798
duration 20
count 1
]
edge
[
source 1760
target 1768
duration 440
count 12
]
edge
[
source 1760
target 1770
duration 80
count 4
]
edge
[
source 1760
target 1772
duration 20
count 1
]
edge
[
source 1760
target 1775
duration 60
count 3
]
edge
[
source 1760
target 1800
duration 20
count 1
]
edge
[
source 1760
target 1778
duration 20
count 1
]
edge
[
source 1760
target 1796
duration 140
count 6
]
edge
[
source 1760
target 1783
duration 20
count 1
]
edge
[
source 1761
target 1792
duration 300
count 8
]
edge
[
source 1761
target 1922
duration 20
count 1
]
edge
[
source 1761
target 1796
duration 100
count 5
]
edge
[
source 1761
target 1798
duration 80
count 4
]
edge
[
source 1761
target 1799
duration 140
count 5
]
edge
[
source 1761
target 1858
duration 400
count 14
]
edge
[
source 1761
target 1426
duration 20
count 1
]
edge
[
source 1761
target 1859
duration 40
count 2
]
edge
[
source 1761
target 1902
duration 20
count 1
]
edge
[
source 1761
target 1819
duration 20
count 1
]
edge
[
source 1761
target 1821
duration 20
count 1
]
edge
[
source 1761
target 1822
duration 20
count 1
]
edge
[
source 1761
target 1833
duration 60
count 3
]
edge
[
source 1761
target 1493
duration 20
count 1
]
edge
[
source 1761
target 1837
duration 40
count 1
]
edge
[
source 1761
target 1457
duration 20
count 1
]
edge
[
source 1761
target 1908
duration 20
count 1
]
edge
[
source 1761
target 1887
duration 20
count 1
]
edge
[
source 1761
target 1855
duration 20
count 1
]
edge
[
source 1761
target 1920
duration 20
count 1
]
edge
[
source 1761
target 1861
duration 100
count 3
]
edge
[
source 1761
target 1866
duration 20
count 1
]
edge
[
source 1761
target 1801
duration 40
count 1
]
edge
[
source 1761
target 1452
duration 20
count 1
]
edge
[
source 1761
target 1890
duration 40
count 2
]
edge
[
source 1761
target 1898
duration 440
count 19
]
edge
[
source 1761
target 1764
duration 240
count 7
]
edge
[
source 1761
target 1766
duration 120
count 4
]
edge
[
source 1761
target 1767
duration 780
count 23
]
edge
[
source 1761
target 1768
duration 120
count 6
]
edge
[
source 1761
target 1770
duration 60
count 3
]
edge
[
source 1761
target 1772
duration 40
count 1
]
edge
[
source 1761
target 1774
duration 40
count 2
]
edge
[
source 1761
target 1775
duration 60
count 3
]
edge
[
source 1761
target 1778
duration 140
count 4
]
edge
[
source 1761
target 1907
duration 1340
count 32
]
edge
[
source 1761
target 1780
duration 60
count 3
]
edge
[
source 1761
target 1783
duration 480
count 19
]
edge
[
source 1761
target 1787
duration 40
count 2
]
edge
[
source 1761
target 1789
duration 440
count 16
]
edge
[
source 1761
target 1790
duration 140
count 5
]
edge
[
source 1761
target 1919
duration 20
count 1
]
edge
[
source 1763
target 1920
duration 20
count 1
]
edge
[
source 1763
target 1800
duration 20
count 1
]
edge
[
source 1763
target 1801
duration 120
count 5
]
edge
[
source 1763
target 1809
duration 540
count 17
]
edge
[
source 1763
target 1859
duration 520
count 18
]
edge
[
source 1763
target 1795
duration 600
count 17
]
edge
[
source 1763
target 1820
duration 140
count 7
]
edge
[
source 1763
target 1821
duration 20
count 1
]
edge
[
source 1763
target 1822
duration 280
count 7
]
edge
[
source 1763
target 1833
duration 1240
count 41
]
edge
[
source 1763
target 1837
duration 20
count 1
]
edge
[
source 1763
target 1838
duration 500
count 16
]
edge
[
source 1763
target 1843
duration 240
count 10
]
edge
[
source 1763
target 1908
duration 20
count 1
]
edge
[
source 1763
target 1851
duration 20
count 1
]
edge
[
source 1763
target 1887
duration 940
count 25
]
edge
[
source 1763
target 1890
duration 40
count 2
]
edge
[
source 1763
target 1768
duration 20
count 1
]
edge
[
source 1763
target 1902
duration 120
count 4
]
edge
[
source 1763
target 1835
duration 20
count 1
]
edge
[
source 1763
target 1907
duration 160
count 2
]
edge
[
source 1763
target 1780
duration 260
count 10
]
edge
[
source 1763
target 1909
duration 520
count 20
]
edge
[
source 1763
target 1782
duration 160
count 7
]
edge
[
source 1763
target 1783
duration 20
count 1
]
edge
[
source 1764
target 1792
duration 460
count 13
]
edge
[
source 1764
target 1796
duration 100
count 5
]
edge
[
source 1764
target 1797
duration 20
count 1
]
edge
[
source 1764
target 1798
duration 240
count 12
]
edge
[
source 1764
target 1799
duration 320
count 13
]
edge
[
source 1764
target 1902
duration 280
count 9
]
edge
[
source 1764
target 1437
duration 20
count 1
]
edge
[
source 1764
target 1821
duration 20
count 1
]
edge
[
source 1764
target 1833
duration 20
count 1
]
edge
[
source 1764
target 1898
duration 60
count 1
]
edge
[
source 1764
target 1838
duration 200
count 9
]
edge
[
source 1764
target 1457
duration 20
count 1
]
edge
[
source 1764
target 1779
duration 20
count 1
]
edge
[
source 1764
target 1887
duration 20
count 1
]
edge
[
source 1764
target 1852
duration 20
count 1
]
edge
[
source 1764
target 1861
duration 160
count 6
]
edge
[
source 1764
target 1911
duration 400
count 12
]
edge
[
source 1764
target 1766
duration 60
count 3
]
edge
[
source 1764
target 1767
duration 20
count 1
]
edge
[
source 1764
target 1768
duration 400
count 13
]
edge
[
source 1764
target 1770
duration 700
count 19
]
edge
[
source 1764
target 1772
duration 220
count 10
]
edge
[
source 1764
target 1774
duration 20
count 1
]
edge
[
source 1764
target 1775
duration 260
count 11
]
edge
[
source 1764
target 1778
duration 80
count 4
]
edge
[
source 1764
target 1780
duration 40
count 2
]
edge
[
source 1764
target 1783
duration 220
count 10
]
edge
[
source 1764
target 1912
duration 100
count 4
]
edge
[
source 1764
target 1913
duration 20
count 1
]
edge
[
source 1764
target 1787
duration 80
count 4
]
edge
[
source 1764
target 1789
duration 100
count 3
]
edge
[
source 1764
target 1790
duration 80
count 4
]
edge
[
source 1765
target 1920
duration 20
count 1
]
edge
[
source 1765
target 1922
duration 40
count 2
]
edge
[
source 1765
target 1797
duration 80
count 4
]
edge
[
source 1765
target 1426
duration 40
count 1
]
edge
[
source 1765
target 1434
duration 240
count 10
]
edge
[
source 1765
target 1821
duration 40
count 2
]
edge
[
source 1765
target 1443
duration 100
count 3
]
edge
[
source 1765
target 1885
duration 80
count 3
]
edge
[
source 1765
target 1457
duration 20
count 1
]
edge
[
source 1765
target 1835
duration 40
count 2
]
edge
[
source 1765
target 1837
duration 80
count 4
]
edge
[
source 1765
target 1907
duration 20
count 1
]
edge
[
source 1765
target 1468
duration 40
count 2
]
edge
[
source 1765
target 1866
duration 100
count 4
]
edge
[
source 1765
target 1792
duration 20
count 1
]
edge
[
source 1765
target 1857
duration 40
count 2
]
edge
[
source 1765
target 1483
duration 20
count 1
]
edge
[
source 1765
target 1912
duration 300
count 11
]
edge
[
source 1765
target 1480
duration 60
count 1
]
edge
[
source 1765
target 1452
duration 20
count 1
]
edge
[
source 1765
target 1482
duration 80
count 2
]
edge
[
source 1765
target 1847
duration 160
count 7
]
edge
[
source 1765
target 1486
duration 20
count 1
]
edge
[
source 1765
target 1477
duration 20
count 1
]
edge
[
source 1765
target 1916
duration 20
count 1
]
edge
[
source 1765
target 1493
duration 20
count 1
]
edge
[
source 1765
target 1498
duration 40
count 2
]
edge
[
source 1765
target 1501
duration 60
count 3
]
edge
[
source 1765
target 1502
duration 20
count 1
]
edge
[
source 1765
target 1503
duration 480
count 21
]
edge
[
source 1765
target 1895
duration 40
count 2
]
edge
[
source 1765
target 1902
duration 60
count 3
]
edge
[
source 1765
target 1533
duration 180
count 8
]
edge
[
source 1765
target 1520
duration 20
count 1
]
edge
[
source 1765
target 1522
duration 20
count 1
]
edge
[
source 1765
target 1779
duration 120
count 6
]
edge
[
source 1765
target 1908
duration 2380
count 62
]
edge
[
source 1765
target 1913
duration 660
count 15
]
edge
[
source 1765
target 1919
duration 100
count 5
]
edge
[
source 1765
target 1532
duration 20
count 1
]
edge
[
source 1766
target 1792
duration 340
count 13
]
edge
[
source 1766
target 1796
duration 120
count 6
]
edge
[
source 1766
target 1798
duration 40
count 2
]
edge
[
source 1766
target 1799
duration 20
count 1
]
edge
[
source 1766
target 1836
duration 20
count 1
]
edge
[
source 1766
target 1837
duration 20
count 1
]
edge
[
source 1766
target 1898
duration 20
count 1
]
edge
[
source 1766
target 1767
duration 340
count 11
]
edge
[
source 1766
target 1768
duration 140
count 7
]
edge
[
source 1766
target 1770
duration 100
count 5
]
edge
[
source 1766
target 1772
duration 2000
count 55
]
edge
[
source 1766
target 1774
duration 240
count 8
]
edge
[
source 1766
target 1775
duration 60
count 3
]
edge
[
source 1766
target 1778
duration 80
count 4
]
edge
[
source 1766
target 1783
duration 280
count 12
]
edge
[
source 1766
target 1787
duration 100
count 5
]
edge
[
source 1766
target 1789
duration 60
count 2
]
edge
[
source 1766
target 1790
duration 460
count 16
]
edge
[
source 1767
target 1792
duration 160
count 8
]
edge
[
source 1767
target 1796
duration 40
count 2
]
edge
[
source 1767
target 1798
duration 180
count 4
]
edge
[
source 1767
target 1801
duration 20
count 1
]
edge
[
source 1767
target 1805
duration 20
count 1
]
edge
[
source 1767
target 1809
duration 20
count 1
]
edge
[
source 1767
target 1775
duration 140
count 5
]
edge
[
source 1767
target 1822
duration 120
count 3
]
edge
[
source 1767
target 1837
duration 20
count 1
]
edge
[
source 1767
target 1843
duration 80
count 2
]
edge
[
source 1767
target 1851
duration 80
count 2
]
edge
[
source 1767
target 1855
duration 100
count 2
]
edge
[
source 1767
target 1859
duration 20
count 1
]
edge
[
source 1767
target 1889
duration 20
count 1
]
edge
[
source 1767
target 1866
duration 20
count 1
]
edge
[
source 1767
target 1911
duration 140
count 7
]
edge
[
source 1767
target 1498
duration 20
count 1
]
edge
[
source 1767
target 1887
duration 60
count 3
]
edge
[
source 1767
target 1895
duration 20
count 1
]
edge
[
source 1767
target 1768
duration 280
count 11
]
edge
[
source 1767
target 1916
duration 240
count 6
]
edge
[
source 1767
target 1774
duration 120
count 6
]
edge
[
source 1767
target 1907
duration 40
count 2
]
edge
[
source 1767
target 1780
duration 1120
count 22
]
edge
[
source 1767
target 1909
duration 40
count 2
]
edge
[
source 1767
target 1782
duration 60
count 3
]
edge
[
source 1767
target 1783
duration 40
count 2
]
edge
[
source 1767
target 1787
duration 240
count 2
]
edge
[
source 1767
target 1532
duration 20
count 1
]
edge
[
source 1767
target 1789
duration 140
count 7
]
edge
[
source 1767
target 1790
duration 180
count 9
]
edge
[
source 1768
target 1792
duration 320
count 15
]
edge
[
source 1768
target 1920
duration 80
count 3
]
edge
[
source 1768
target 1922
duration 220
count 7
]
edge
[
source 1768
target 1795
duration 20
count 1
]
edge
[
source 1768
target 1796
duration 140
count 6
]
edge
[
source 1768
target 1798
duration 460
count 14
]
edge
[
source 1768
target 1801
duration 40
count 1
]
edge
[
source 1768
target 1809
duration 20
count 1
]
edge
[
source 1768
target 1774
duration 180
count 5
]
edge
[
source 1768
target 1822
duration 20
count 1
]
edge
[
source 1768
target 1520
duration 20
count 1
]
edge
[
source 1768
target 1820
duration 60
count 2
]
edge
[
source 1768
target 1833
duration 120
count 6
]
edge
[
source 1768
target 1838
duration 60
count 3
]
edge
[
source 1768
target 1843
duration 720
count 18
]
edge
[
source 1768
target 1847
duration 40
count 1
]
edge
[
source 1768
target 1887
duration 20
count 1
]
edge
[
source 1768
target 1451
duration 20
count 1
]
edge
[
source 1768
target 1858
duration 20
count 1
]
edge
[
source 1768
target 1859
duration 40
count 2
]
edge
[
source 1768
target 1782
duration 420
count 12
]
edge
[
source 1768
target 1866
duration 160
count 2
]
edge
[
source 1768
target 1911
duration 80
count 4
]
edge
[
source 1768
target 1898
duration 20
count 1
]
edge
[
source 1768
target 1890
duration 20
count 1
]
edge
[
source 1768
target 1770
duration 20
count 1
]
edge
[
source 1768
target 1772
duration 60
count 3
]
edge
[
source 1768
target 1902
duration 20
count 1
]
edge
[
source 1768
target 1775
duration 60
count 3
]
edge
[
source 1768
target 1778
duration 540
count 17
]
edge
[
source 1768
target 1907
duration 40
count 1
]
edge
[
source 1768
target 1780
duration 140
count 5
]
edge
[
source 1768
target 1909
duration 20
count 1
]
edge
[
source 1768
target 1910
duration 40
count 1
]
edge
[
source 1768
target 1783
duration 560
count 17
]
edge
[
source 1768
target 1912
duration 20
count 1
]
edge
[
source 1768
target 1787
duration 80
count 4
]
edge
[
source 1768
target 1789
duration 120
count 5
]
edge
[
source 1768
target 1790
duration 1580
count 40
]
edge
[
source 1770
target 1798
duration 40
count 2
]
edge
[
source 1770
target 1799
duration 20
count 1
]
edge
[
source 1770
target 1774
duration 160
count 5
]
edge
[
source 1770
target 1775
duration 120
count 4
]
edge
[
source 1770
target 1778
duration 60
count 3
]
edge
[
source 1770
target 1429
duration 20
count 1
]
edge
[
source 1770
target 1783
duration 60
count 3
]
edge
[
source 1770
target 1796
duration 80
count 3
]
edge
[
source 1770
target 1787
duration 100
count 5
]
edge
[
source 1770
target 1790
duration 300
count 10
]
edge
[
source 1772
target 1792
duration 120
count 5
]
edge
[
source 1772
target 1796
duration 120
count 5
]
edge
[
source 1772
target 1798
duration 400
count 14
]
edge
[
source 1772
target 1799
duration 80
count 4
]
edge
[
source 1772
target 1902
duration 20
count 1
]
edge
[
source 1772
target 1461
duration 20
count 1
]
edge
[
source 1772
target 1774
duration 220
count 11
]
edge
[
source 1772
target 1775
duration 40
count 2
]
edge
[
source 1772
target 1778
duration 20
count 1
]
edge
[
source 1772
target 1779
duration 40
count 2
]
edge
[
source 1772
target 1782
duration 20
count 1
]
edge
[
source 1772
target 1783
duration 120
count 4
]
edge
[
source 1772
target 1787
duration 60
count 3
]
edge
[
source 1772
target 1789
duration 20
count 1
]
edge
[
source 1772
target 1790
duration 100
count 4
]
edge
[
source 1774
target 1792
duration 220
count 8
]
edge
[
source 1774
target 1796
duration 200
count 6
]
edge
[
source 1774
target 1798
duration 180
count 8
]
edge
[
source 1774
target 1799
duration 360
count 13
]
edge
[
source 1774
target 1501
duration 20
count 1
]
edge
[
source 1774
target 1434
duration 20
count 1
]
edge
[
source 1774
target 1443
duration 20
count 1
]
edge
[
source 1774
target 1465
duration 20
count 1
]
edge
[
source 1774
target 1859
duration 20
count 1
]
edge
[
source 1774
target 1480
duration 20
count 1
]
edge
[
source 1774
target 1533
duration 20
count 1
]
edge
[
source 1774
target 1775
duration 360
count 13
]
edge
[
source 1774
target 1778
duration 40
count 2
]
edge
[
source 1774
target 1783
duration 20
count 1
]
edge
[
source 1774
target 1787
duration 20
count 1
]
edge
[
source 1774
target 1789
duration 200
count 6
]
edge
[
source 1774
target 1790
duration 320
count 13
]
edge
[
source 1775
target 1792
duration 200
count 10
]
edge
[
source 1775
target 1796
duration 120
count 5
]
edge
[
source 1775
target 1798
duration 160
count 7
]
edge
[
source 1775
target 1799
duration 120
count 4
]
edge
[
source 1775
target 1822
duration 20
count 1
]
edge
[
source 1775
target 1880
duration 20
count 1
]
edge
[
source 1775
target 1783
duration 120
count 6
]
edge
[
source 1775
target 1787
duration 60
count 3
]
edge
[
source 1775
target 1789
duration 80
count 4
]
edge
[
source 1775
target 1790
duration 940
count 29
]
edge
[
source 1778
target 1792
duration 80
count 4
]
edge
[
source 1778
target 1920
duration 20
count 1
]
edge
[
source 1778
target 1796
duration 140
count 6
]
edge
[
source 1778
target 1798
duration 100
count 4
]
edge
[
source 1778
target 1799
duration 80
count 4
]
edge
[
source 1778
target 1902
duration 80
count 3
]
edge
[
source 1778
target 1820
duration 40
count 1
]
edge
[
source 1778
target 1833
duration 80
count 4
]
edge
[
source 1778
target 1838
duration 100
count 4
]
edge
[
source 1778
target 1843
duration 20
count 1
]
edge
[
source 1778
target 1887
duration 20
count 1
]
edge
[
source 1778
target 1859
duration 80
count 3
]
edge
[
source 1778
target 1911
duration 20
count 1
]
edge
[
source 1778
target 1890
duration 40
count 1
]
edge
[
source 1778
target 1907
duration 80
count 4
]
edge
[
source 1778
target 1780
duration 120
count 4
]
edge
[
source 1778
target 1909
duration 20
count 1
]
edge
[
source 1778
target 1783
duration 140
count 6
]
edge
[
source 1778
target 1789
duration 240
count 3
]
edge
[
source 1778
target 1790
duration 60
count 2
]
edge
[
source 1779
target 1920
duration 1200
count 37
]
edge
[
source 1779
target 1922
duration 40
count 2
]
edge
[
source 1779
target 1479
duration 20
count 1
]
edge
[
source 1779
target 1917
duration 40
count 1
]
edge
[
source 1779
target 1907
duration 20
count 1
]
edge
[
source 1779
target 1908
duration 60
count 3
]
edge
[
source 1779
target 1909
duration 20
count 1
]
edge
[
source 1780
target 1798
duration 20
count 1
]
edge
[
source 1780
target 1809
duration 100
count 3
]
edge
[
source 1780
target 1795
duration 480
count 14
]
edge
[
source 1780
target 1859
duration 220
count 8
]
edge
[
source 1780
target 1820
duration 200
count 5
]
edge
[
source 1780
target 1822
duration 360
count 14
]
edge
[
source 1780
target 1833
duration 1720
count 53
]
edge
[
source 1780
target 1837
duration 20
count 1
]
edge
[
source 1780
target 1838
duration 240
count 9
]
edge
[
source 1780
target 1843
duration 280
count 11
]
edge
[
source 1780
target 1858
duration 20
count 1
]
edge
[
source 1780
target 1889
duration 20
count 1
]
edge
[
source 1780
target 1483
duration 40
count 2
]
edge
[
source 1780
target 1801
duration 120
count 3
]
edge
[
source 1780
target 1486
duration 40
count 2
]
edge
[
source 1780
target 1851
duration 60
count 3
]
edge
[
source 1780
target 1887
duration 100
count 4
]
edge
[
source 1780
target 1516
duration 20
count 1
]
edge
[
source 1780
target 1783
duration 20
count 1
]
edge
[
source 1780
target 1902
duration 100
count 4
]
edge
[
source 1780
target 1789
duration 20
count 1
]
edge
[
source 1780
target 1908
duration 20
count 1
]
edge
[
source 1780
target 1909
duration 540
count 21
]
edge
[
source 1780
target 1911
duration 100
count 5
]
edge
[
source 1780
target 1855
duration 40
count 2
]
edge
[
source 1780
target 1916
duration 60
count 2
]
edge
[
source 1780
target 1533
duration 40
count 1
]
edge
[
source 1782
target 1792
duration 20
count 1
]
edge
[
source 1782
target 1795
duration 180
count 7
]
edge
[
source 1782
target 1796
duration 20
count 1
]
edge
[
source 1782
target 1820
duration 1560
count 48
]
edge
[
source 1782
target 1801
duration 20
count 1
]
edge
[
source 1782
target 1809
duration 300
count 9
]
edge
[
source 1782
target 1426
duration 20
count 1
]
edge
[
source 1782
target 1822
duration 220
count 9
]
edge
[
source 1782
target 1833
duration 560
count 17
]
edge
[
source 1782
target 1838
duration 80
count 4
]
edge
[
source 1782
target 1843
duration 1860
count 45
]
edge
[
source 1782
target 1851
duration 60
count 2
]
edge
[
source 1782
target 1859
duration 1000
count 37
]
edge
[
source 1782
target 1889
duration 320
count 10
]
edge
[
source 1782
target 1898
duration 40
count 2
]
edge
[
source 1782
target 1902
duration 20
count 1
]
edge
[
source 1782
target 1907
duration 100
count 3
]
edge
[
source 1782
target 1909
duration 60
count 3
]
edge
[
source 1782
target 1911
duration 20
count 1
]
edge
[
source 1782
target 1912
duration 20
count 1
]
edge
[
source 1782
target 1855
duration 40
count 2
]
edge
[
source 1782
target 1916
duration 20
count 1
]
edge
[
source 1782
target 1790
duration 40
count 2
]
edge
[
source 1783
target 1792
duration 700
count 28
]
edge
[
source 1783
target 1796
duration 640
count 23
]
edge
[
source 1783
target 1798
duration 240
count 8
]
edge
[
source 1783
target 1799
duration 120
count 6
]
edge
[
source 1783
target 1809
duration 20
count 1
]
edge
[
source 1783
target 1902
duration 20
count 1
]
edge
[
source 1783
target 1822
duration 20
count 1
]
edge
[
source 1783
target 1836
duration 40
count 2
]
edge
[
source 1783
target 1461
duration 20
count 1
]
edge
[
source 1783
target 1908
duration 20
count 1
]
edge
[
source 1783
target 1857
duration 20
count 1
]
edge
[
source 1783
target 1859
duration 20
count 1
]
edge
[
source 1783
target 1493
duration 20
count 1
]
edge
[
source 1783
target 1504
duration 20
count 1
]
edge
[
source 1783
target 1909
duration 20
count 1
]
edge
[
source 1783
target 1912
duration 20
count 1
]
edge
[
source 1783
target 1913
duration 20
count 1
]
edge
[
source 1783
target 1787
duration 1600
count 36
]
edge
[
source 1783
target 1789
duration 580
count 23
]
edge
[
source 1783
target 1790
duration 160
count 7
]
edge
[
source 1783
target 1919
duration 20
count 1
]
edge
[
source 1787
target 1792
duration 240
count 11
]
edge
[
source 1787
target 1796
duration 220
count 10
]
edge
[
source 1787
target 1798
duration 60
count 3
]
edge
[
source 1787
target 1799
duration 40
count 2
]
edge
[
source 1787
target 1426
duration 20
count 1
]
edge
[
source 1787
target 1852
duration 20
count 1
]
edge
[
source 1787
target 1486
duration 20
count 1
]
edge
[
source 1787
target 1789
duration 40
count 2
]
edge
[
source 1787
target 1790
duration 60
count 1
]
edge
[
source 1789
target 1792
duration 900
count 31
]
edge
[
source 1789
target 1922
duration 20
count 1
]
edge
[
source 1789
target 1796
duration 1340
count 36
]
edge
[
source 1789
target 1798
duration 60
count 3
]
edge
[
source 1789
target 1799
duration 40
count 2
]
edge
[
source 1789
target 1809
duration 40
count 2
]
edge
[
source 1789
target 1822
duration 20
count 1
]
edge
[
source 1789
target 1833
duration 40
count 2
]
edge
[
source 1789
target 1837
duration 20
count 1
]
edge
[
source 1789
target 1457
duration 20
count 1
]
edge
[
source 1789
target 1465
duration 20
count 1
]
edge
[
source 1789
target 1851
duration 60
count 3
]
edge
[
source 1789
target 1908
duration 120
count 3
]
edge
[
source 1789
target 1859
duration 20
count 1
]
edge
[
source 1789
target 1911
duration 20
count 1
]
edge
[
source 1789
target 1916
duration 20
count 1
]
edge
[
source 1789
target 1907
duration 20
count 1
]
edge
[
source 1789
target 1532
duration 20
count 1
]
edge
[
source 1789
target 1790
duration 80
count 4
]
edge
[
source 1789
target 1919
duration 20
count 1
]
edge
[
source 1790
target 1792
duration 120
count 6
]
edge
[
source 1790
target 1920
duration 20
count 1
]
edge
[
source 1790
target 1922
duration 360
count 14
]
edge
[
source 1790
target 1795
duration 20
count 1
]
edge
[
source 1790
target 1796
duration 120
count 6
]
edge
[
source 1790
target 1798
duration 200
count 7
]
edge
[
source 1790
target 1799
duration 40
count 2
]
edge
[
source 1790
target 1902
duration 80
count 4
]
edge
[
source 1790
target 1453
duration 20
count 1
]
edge
[
source 1790
target 1519
duration 20
count 1
]
edge
[
source 1790
target 1887
duration 40
count 2
]
edge
[
source 1790
target 1822
duration 120
count 5
]
edge
[
source 1790
target 1911
duration 80
count 4
]
edge
[
source 1790
target 1836
duration 20
count 1
]
edge
[
source 1790
target 1837
duration 60
count 3
]
edge
[
source 1790
target 1838
duration 40
count 2
]
edge
[
source 1790
target 1457
duration 20
count 1
]
edge
[
source 1790
target 1843
duration 140
count 5
]
edge
[
source 1790
target 1847
duration 20
count 1
]
edge
[
source 1790
target 1851
duration 380
count 10
]
edge
[
source 1790
target 1482
duration 20
count 1
]
edge
[
source 1790
target 1855
duration 80
count 3
]
edge
[
source 1790
target 1858
duration 20
count 1
]
edge
[
source 1790
target 1859
duration 80
count 1
]
edge
[
source 1790
target 1866
duration 140
count 3
]
edge
[
source 1790
target 1486
duration 20
count 1
]
edge
[
source 1790
target 1504
duration 20
count 1
]
edge
[
source 1790
target 1890
duration 220
count 7
]
edge
[
source 1790
target 1909
duration 40
count 2
]
edge
[
source 1790
target 1910
duration 20
count 1
]
edge
[
source 1790
target 1912
duration 40
count 2
]
edge
[
source 1790
target 1916
duration 260
count 10
]
edge
[
source 1792
target 1796
duration 300
count 12
]
edge
[
source 1792
target 1798
duration 380
count 10
]
edge
[
source 1792
target 1799
duration 80
count 3
]
edge
[
source 1792
target 1820
duration 60
count 2
]
edge
[
source 1792
target 1822
duration 20
count 1
]
edge
[
source 1792
target 1887
duration 20
count 1
]
edge
[
source 1792
target 1855
duration 20
count 1
]
edge
[
source 1792
target 1898
duration 20
count 1
]
edge
[
source 1795
target 1798
duration 20
count 1
]
edge
[
source 1795
target 1800
duration 200
count 9
]
edge
[
source 1795
target 1801
duration 280
count 13
]
edge
[
source 1795
target 1809
duration 440
count 17
]
edge
[
source 1795
target 1820
duration 260
count 12
]
edge
[
source 1795
target 1822
duration 860
count 26
]
edge
[
source 1795
target 1833
duration 480
count 21
]
edge
[
source 1795
target 1838
duration 720
count 24
]
edge
[
source 1795
target 1843
duration 300
count 12
]
edge
[
source 1795
target 1465
duration 20
count 1
]
edge
[
source 1795
target 1866
duration 20
count 1
]
edge
[
source 1795
target 1859
duration 720
count 19
]
edge
[
source 1795
target 1847
duration 20
count 1
]
edge
[
source 1795
target 1851
duration 400
count 14
]
edge
[
source 1795
target 1887
duration 80
count 3
]
edge
[
source 1795
target 1890
duration 60
count 3
]
edge
[
source 1795
target 1898
duration 60
count 2
]
edge
[
source 1795
target 1907
duration 40
count 2
]
edge
[
source 1795
target 1909
duration 500
count 17
]
edge
[
source 1795
target 1911
duration 20
count 1
]
edge
[
source 1795
target 1912
duration 20
count 1
]
edge
[
source 1795
target 1916
duration 20
count 1
]
edge
[
source 1796
target 1798
duration 40
count 2
]
edge
[
source 1796
target 1799
duration 20
count 1
]
edge
[
source 1796
target 1809
duration 20
count 1
]
edge
[
source 1796
target 1815
duration 20
count 1
]
edge
[
source 1796
target 1459
duration 20
count 1
]
edge
[
source 1796
target 1847
duration 20
count 1
]
edge
[
source 1796
target 1887
duration 20
count 1
]
edge
[
source 1796
target 1480
duration 20
count 1
]
edge
[
source 1796
target 1498
duration 20
count 1
]
edge
[
source 1797
target 1426
duration 40
count 2
]
edge
[
source 1797
target 1437
duration 20
count 1
]
edge
[
source 1797
target 1439
duration 820
count 20
]
edge
[
source 1797
target 1835
duration 20
count 1
]
edge
[
source 1797
target 1837
duration 200
count 8
]
edge
[
source 1797
target 1458
duration 20
count 1
]
edge
[
source 1797
target 1847
duration 100
count 5
]
edge
[
source 1797
target 1465
duration 560
count 17
]
edge
[
source 1797
target 1477
duration 660
count 15
]
edge
[
source 1797
target 1480
duration 400
count 15
]
edge
[
source 1797
target 1866
duration 200
count 8
]
edge
[
source 1797
target 1483
duration 20
count 1
]
edge
[
source 1797
target 1912
duration 80
count 2
]
edge
[
source 1797
target 1500
duration 340
count 15
]
edge
[
source 1797
target 1503
duration 220
count 7
]
edge
[
source 1797
target 1504
duration 260
count 12
]
edge
[
source 1797
target 1890
duration 20
count 1
]
edge
[
source 1797
target 1902
duration 20
count 1
]
edge
[
source 1797
target 1519
duration 20
count 1
]
edge
[
source 1797
target 1525
duration 360
count 10
]
edge
[
source 1797
target 1528
duration 60
count 3
]
edge
[
source 1797
target 1532
duration 140
count 6
]
edge
[
source 1797
target 1533
duration 80
count 4
]
edge
[
source 1798
target 1922
duration 20
count 1
]
edge
[
source 1798
target 1799
duration 100
count 3
]
edge
[
source 1798
target 1833
duration 20
count 1
]
edge
[
source 1798
target 1458
duration 20
count 1
]
edge
[
source 1798
target 1859
duration 20
count 1
]
edge
[
source 1798
target 1495
duration 20
count 1
]
edge
[
source 1798
target 1916
duration 40
count 2
]
edge
[
source 1798
target 1533
duration 20
count 1
]
edge
[
source 1799
target 1838
duration 60
count 3
]
edge
[
source 1799
target 1851
duration 20
count 1
]
edge
[
source 1800
target 1801
duration 20
count 1
]
edge
[
source 1800
target 1809
duration 40
count 1
]
edge
[
source 1800
target 1820
duration 660
count 19
]
edge
[
source 1800
target 1822
duration 40
count 2
]
edge
[
source 1800
target 1833
duration 300
count 12
]
edge
[
source 1800
target 1838
duration 140
count 7
]
edge
[
source 1800
target 1843
duration 100
count 4
]
edge
[
source 1800
target 1859
duration 1100
count 20
]
edge
[
source 1800
target 1909
duration 20
count 1
]
edge
[
source 1801
target 1851
duration 840
count 21
]
edge
[
source 1801
target 1809
duration 40
count 2
]
edge
[
source 1801
target 1822
duration 680
count 26
]
edge
[
source 1801
target 1820
duration 60
count 3
]
edge
[
source 1801
target 1838
duration 220
count 5
]
edge
[
source 1801
target 1843
duration 540
count 22
]
edge
[
source 1801
target 1866
duration 20
count 1
]
edge
[
source 1801
target 1854
duration 20
count 1
]
edge
[
source 1801
target 1909
duration 20
count 1
]
edge
[
source 1801
target 1859
duration 1260
count 37
]
edge
[
source 1801
target 1483
duration 20
count 1
]
edge
[
source 1801
target 1890
duration 40
count 2
]
edge
[
source 1801
target 1916
duration 120
count 3
]
edge
[
source 1801
target 1833
duration 120
count 5
]
edge
[
source 1801
target 1858
duration 40
count 2
]
edge
[
source 1801
target 1533
duration 20
count 1
]
edge
[
source 1802
target 1857
duration 100
count 5
]
edge
[
source 1802
target 1835
duration 60
count 3
]
edge
[
source 1802
target 1888
duration 100
count 3
]
edge
[
source 1802
target 1831
duration 140
count 5
]
edge
[
source 1802
target 1866
duration 60
count 2
]
edge
[
source 1802
target 1803
duration 20
count 1
]
edge
[
source 1802
target 1836
duration 40
count 2
]
edge
[
source 1802
target 1885
duration 40
count 2
]
edge
[
source 1802
target 1521
duration 40
count 2
]
edge
[
source 1802
target 1895
duration 20
count 1
]
edge
[
source 1802
target 1910
duration 40
count 2
]
edge
[
source 1802
target 1847
duration 100
count 3
]
edge
[
source 1802
target 1880
duration 240
count 7
]
edge
[
source 1802
target 1818
duration 40
count 1
]
edge
[
source 1802
target 1821
duration 380
count 14
]
edge
[
source 1802
target 1439
duration 60
count 3
]
edge
[
source 1803
target 1857
duration 80
count 3
]
edge
[
source 1803
target 1895
duration 20
count 1
]
edge
[
source 1803
target 1835
duration 20
count 1
]
edge
[
source 1803
target 1521
duration 200
count 8
]
edge
[
source 1803
target 1847
duration 20
count 1
]
edge
[
source 1803
target 1831
duration 20
count 1
]
edge
[
source 1803
target 1818
duration 40
count 1
]
edge
[
source 1803
target 1819
duration 20
count 1
]
edge
[
source 1805
target 1888
duration 100
count 5
]
edge
[
source 1805
target 1821
duration 20
count 1
]
edge
[
source 1805
target 1895
duration 80
count 3
]
edge
[
source 1805
target 1865
duration 160
count 7
]
edge
[
source 1805
target 1866
duration 80
count 4
]
edge
[
source 1805
target 1836
duration 280
count 9
]
edge
[
source 1805
target 1807
duration 60
count 2
]
edge
[
source 1805
target 1910
duration 20
count 1
]
edge
[
source 1805
target 1880
duration 220
count 11
]
edge
[
source 1805
target 1818
duration 40
count 1
]
edge
[
source 1805
target 1819
duration 300
count 13
]
edge
[
source 1805
target 1885
duration 60
count 2
]
edge
[
source 1807
target 1895
duration 500
count 12
]
edge
[
source 1807
target 1865
duration 40
count 2
]
edge
[
source 1807
target 1835
duration 100
count 3
]
edge
[
source 1807
target 1836
duration 20
count 1
]
edge
[
source 1807
target 1885
duration 20
count 1
]
edge
[
source 1807
target 1521
duration 20
count 1
]
edge
[
source 1807
target 1847
duration 20
count 1
]
edge
[
source 1807
target 1880
duration 1100
count 27
]
edge
[
source 1807
target 1819
duration 80
count 4
]
edge
[
source 1807
target 1821
duration 40
count 1
]
edge
[
source 1809
target 1820
duration 480
count 19
]
edge
[
source 1809
target 1822
duration 40
count 2
]
edge
[
source 1809
target 1833
duration 180
count 8
]
edge
[
source 1809
target 1838
duration 340
count 10
]
edge
[
source 1809
target 1843
duration 80
count 4
]
edge
[
source 1809
target 1461
duration 20
count 1
]
edge
[
source 1809
target 1858
duration 20
count 1
]
edge
[
source 1809
target 1859
duration 220
count 9
]
edge
[
source 1809
target 1495
duration 20
count 1
]
edge
[
source 1809
target 1498
duration 20
count 1
]
edge
[
source 1809
target 1898
duration 40
count 1
]
edge
[
source 1809
target 1909
duration 560
count 19
]
edge
[
source 1815
target 1837
duration 80
count 3
]
edge
[
source 1815
target 1908
duration 20
count 1
]
edge
[
source 1815
target 1498
duration 20
count 1
]
edge
[
source 1815
target 1500
duration 20
count 1
]
edge
[
source 1815
target 1503
duration 520
count 15
]
edge
[
source 1815
target 1504
duration 100
count 5
]
edge
[
source 1815
target 1524
duration 100
count 4
]
edge
[
source 1815
target 1525
duration 40
count 2
]
edge
[
source 1815
target 1528
duration 80
count 3
]
edge
[
source 1815
target 1532
duration 1140
count 35
]
edge
[
source 1815
target 1533
duration 160
count 7
]
edge
[
source 1818
target 1888
duration 40
count 2
]
edge
[
source 1818
target 1857
duration 40
count 1
]
edge
[
source 1818
target 1835
duration 20
count 1
]
edge
[
source 1818
target 1831
duration 340
count 10
]
edge
[
source 1818
target 1865
duration 80
count 3
]
edge
[
source 1818
target 1895
duration 440
count 11
]
edge
[
source 1818
target 1836
duration 60
count 2
]
edge
[
source 1818
target 1885
duration 80
count 4
]
edge
[
source 1818
target 1521
duration 200
count 3
]
edge
[
source 1818
target 1880
duration 180
count 7
]
edge
[
source 1818
target 1819
duration 20
count 1
]
edge
[
source 1818
target 1821
duration 40
count 2
]
edge
[
source 1819
target 1888
duration 20
count 1
]
edge
[
source 1819
target 1821
duration 40
count 2
]
edge
[
source 1819
target 1895
duration 120
count 5
]
edge
[
source 1819
target 1865
duration 340
count 14
]
edge
[
source 1819
target 1866
duration 20
count 1
]
edge
[
source 1819
target 1831
duration 120
count 4
]
edge
[
source 1819
target 1836
duration 160
count 5
]
edge
[
source 1819
target 1521
duration 320
count 12
]
edge
[
source 1819
target 1835
duration 20
count 1
]
edge
[
source 1819
target 1910
duration 100
count 3
]
edge
[
source 1819
target 1880
duration 80
count 4
]
edge
[
source 1819
target 1885
duration 80
count 2
]
edge
[
source 1819
target 1857
duration 100
count 4
]
edge
[
source 1820
target 1822
duration 140
count 7
]
edge
[
source 1820
target 1833
duration 2120
count 67
]
edge
[
source 1820
target 1459
duration 20
count 1
]
edge
[
source 1820
target 1838
duration 420
count 19
]
edge
[
source 1820
target 1843
duration 120
count 5
]
edge
[
source 1820
target 1859
duration 100
count 5
]
edge
[
source 1820
target 1863
duration 20
count 1
]
edge
[
source 1820
target 1883
duration 40
count 2
]
edge
[
source 1820
target 1909
duration 80
count 4
]
edge
[
source 1821
target 1857
duration 2820
count 55
]
edge
[
source 1821
target 1452
duration 40
count 1
]
edge
[
source 1821
target 1437
duration 120
count 4
]
edge
[
source 1821
target 1434
duration 80
count 3
]
edge
[
source 1821
target 1831
duration 120
count 4
]
edge
[
source 1821
target 1835
duration 560
count 21
]
edge
[
source 1821
target 1836
duration 40
count 2
]
edge
[
source 1821
target 1837
duration 40
count 2
]
edge
[
source 1821
target 1501
duration 20
count 1
]
edge
[
source 1821
target 1457
duration 40
count 2
]
edge
[
source 1821
target 1458
duration 40
count 2
]
edge
[
source 1821
target 1847
duration 280
count 8
]
edge
[
source 1821
target 1480
duration 20
count 1
]
edge
[
source 1821
target 1865
duration 40
count 1
]
edge
[
source 1821
target 1866
duration 180
count 8
]
edge
[
source 1821
target 1486
duration 20
count 1
]
edge
[
source 1821
target 1493
duration 40
count 1
]
edge
[
source 1821
target 1880
duration 80
count 2
]
edge
[
source 1821
target 1500
duration 60
count 2
]
edge
[
source 1821
target 1885
duration 40
count 2
]
edge
[
source 1821
target 1503
duration 500
count 20
]
edge
[
source 1821
target 1888
duration 80
count 3
]
edge
[
source 1821
target 1895
duration 1200
count 28
]
edge
[
source 1821
target 1898
duration 40
count 1
]
edge
[
source 1821
target 1521
duration 80
count 3
]
edge
[
source 1821
target 1910
duration 100
count 4
]
edge
[
source 1821
target 1912
duration 20
count 1
]
edge
[
source 1821
target 1428
duration 20
count 1
]
edge
[
source 1821
target 1532
duration 40
count 2
]
edge
[
source 1821
target 1533
duration 20
count 1
]
edge
[
source 1822
target 1922
duration 40
count 2
]
edge
[
source 1822
target 1833
duration 460
count 18
]
edge
[
source 1822
target 1837
duration 20
count 1
]
edge
[
source 1822
target 1838
duration 220
count 10
]
edge
[
source 1822
target 1843
duration 1160
count 42
]
edge
[
source 1822
target 1482
duration 20
count 1
]
edge
[
source 1822
target 1859
duration 500
count 17
]
edge
[
source 1822
target 1480
duration 20
count 1
]
edge
[
source 1822
target 1911
duration 140
count 4
]
edge
[
source 1822
target 1907
duration 20
count 1
]
edge
[
source 1822
target 1851
duration 180
count 5
]
edge
[
source 1822
target 1889
duration 1200
count 40
]
edge
[
source 1822
target 1890
duration 40
count 2
]
edge
[
source 1822
target 1898
duration 20
count 1
]
edge
[
source 1822
target 1866
duration 20
count 1
]
edge
[
source 1822
target 1902
duration 20
count 1
]
edge
[
source 1822
target 1909
duration 180
count 8
]
edge
[
source 1822
target 1855
duration 80
count 3
]
edge
[
source 1822
target 1916
duration 100
count 4
]
edge
[
source 1824
target 1426
duration 100
count 5
]
edge
[
source 1824
target 1427
duration 80
count 4
]
edge
[
source 1824
target 1428
duration 180
count 6
]
edge
[
source 1824
target 1431
duration 80
count 3
]
edge
[
source 1824
target 1437
duration 100
count 4
]
edge
[
source 1824
target 1439
duration 40
count 2
]
edge
[
source 1824
target 1441
duration 40
count 1
]
edge
[
source 1824
target 1443
duration 200
count 6
]
edge
[
source 1824
target 1465
duration 100
count 5
]
edge
[
source 1824
target 1471
duration 100
count 4
]
edge
[
source 1824
target 1475
duration 20
count 6
]
edge
[
source 1824
target 1480
duration 20
count 1
]
edge
[
source 1824
target 1482
duration 40
count 2
]
edge
[
source 1824
target 1486
duration 60
count 3
]
edge
[
source 1824
target 1489
duration 120
count 8
]
edge
[
source 1824
target 1435
duration 60
count 2
]
edge
[
source 1831
target 1888
duration 460
count 16
]
edge
[
source 1831
target 1857
duration 420
count 12
]
edge
[
source 1831
target 1835
duration 140
count 4
]
edge
[
source 1831
target 1895
duration 160
count 8
]
edge
[
source 1831
target 1865
duration 300
count 8
]
edge
[
source 1831
target 1836
duration 60
count 3
]
edge
[
source 1831
target 1521
duration 20
count 1
]
edge
[
source 1831
target 1910
duration 240
count 8
]
edge
[
source 1831
target 1880
duration 260
count 8
]
edge
[
source 1831
target 1885
duration 80
count 4
]
edge
[
source 1833
target 1838
duration 460
count 15
]
edge
[
source 1833
target 1457
duration 20
count 1
]
edge
[
source 1833
target 1843
duration 180
count 8
]
edge
[
source 1833
target 1908
duration 20
count 1
]
edge
[
source 1833
target 1851
duration 140
count 5
]
edge
[
source 1833
target 1854
duration 20
count 1
]
edge
[
source 1833
target 1855
duration 40
count 2
]
edge
[
source 1833
target 1859
duration 900
count 26
]
edge
[
source 1833
target 1887
duration 820
count 23
]
edge
[
source 1833
target 1898
duration 20
count 1
]
edge
[
source 1833
target 1902
duration 60
count 3
]
edge
[
source 1833
target 1909
duration 120
count 6
]
edge
[
source 1833
target 1911
duration 80
count 4
]
edge
[
source 1833
target 1912
duration 40
count 1
]
edge
[
source 1833
target 1916
duration 60
count 3
]
edge
[
source 1835
target 1888
duration 60
count 3
]
edge
[
source 1835
target 1443
duration 120
count 4
]
edge
[
source 1835
target 1836
duration 20
count 1
]
edge
[
source 1835
target 1837
duration 20
count 1
]
edge
[
source 1835
target 1847
duration 220
count 7
]
edge
[
source 1835
target 1465
duration 20
count 1
]
edge
[
source 1835
target 1434
duration 20
count 1
]
edge
[
source 1835
target 1857
duration 400
count 17
]
edge
[
source 1835
target 1480
duration 20
count 1
]
edge
[
source 1835
target 1865
duration 200
count 3
]
edge
[
source 1835
target 1866
duration 100
count 5
]
edge
[
source 1835
target 1486
duration 20
count 1
]
edge
[
source 1835
target 1498
duration 40
count 1
]
edge
[
source 1835
target 1500
duration 60
count 3
]
edge
[
source 1835
target 1885
duration 220
count 9
]
edge
[
source 1835
target 1503
duration 420
count 12
]
edge
[
source 1835
target 1895
duration 140
count 7
]
edge
[
source 1835
target 1520
duration 20
count 1
]
edge
[
source 1835
target 1521
duration 100
count 3
]
edge
[
source 1835
target 1907
duration 20
count 1
]
edge
[
source 1835
target 1910
duration 1780
count 28
]
edge
[
source 1835
target 1532
duration 20
count 1
]
edge
[
source 1835
target 1533
duration 60
count 2
]
edge
[
source 1836
target 1857
duration 20
count 1
]
edge
[
source 1836
target 1865
duration 1500
count 17
]
edge
[
source 1836
target 1866
duration 60
count 3
]
edge
[
source 1836
target 1880
duration 20
count 1
]
edge
[
source 1836
target 1885
duration 40
count 2
]
edge
[
source 1836
target 1888
duration 100
count 5
]
edge
[
source 1836
target 1895
duration 120
count 4
]
edge
[
source 1836
target 1521
duration 40
count 2
]
edge
[
source 1836
target 1910
duration 100
count 4
]
edge
[
source 1837
target 1920
duration 20
count 1
]
edge
[
source 1837
target 1465
duration 40
count 2
]
edge
[
source 1837
target 1426
duration 20
count 1
]
edge
[
source 1837
target 1428
duration 20
count 1
]
edge
[
source 1837
target 1434
duration 40
count 2
]
edge
[
source 1837
target 1519
duration 180
count 7
]
edge
[
source 1837
target 1437
duration 80
count 4
]
edge
[
source 1837
target 1443
duration 60
count 2
]
edge
[
source 1837
target 1452
duration 460
count 16
]
edge
[
source 1837
target 1457
duration 20
count 1
]
edge
[
source 1837
target 1458
duration 1040
count 28
]
edge
[
source 1837
target 1847
duration 660
count 12
]
edge
[
source 1837
target 1908
duration 20
count 1
]
edge
[
source 1837
target 1439
duration 180
count 7
]
edge
[
source 1837
target 1468
duration 20
count 1
]
edge
[
source 1837
target 1482
duration 160
count 6
]
edge
[
source 1837
target 1498
duration 40
count 1
]
edge
[
source 1837
target 1477
duration 120
count 6
]
edge
[
source 1837
target 1480
duration 20
count 1
]
edge
[
source 1837
target 1866
duration 120
count 4
]
edge
[
source 1837
target 1486
duration 240
count 8
]
edge
[
source 1837
target 1489
duration 20
count 1
]
edge
[
source 1837
target 1912
duration 40
count 2
]
edge
[
source 1837
target 1533
duration 200
count 9
]
edge
[
source 1837
target 1500
duration 1000
count 26
]
edge
[
source 1837
target 1503
duration 140
count 6
]
edge
[
source 1837
target 1504
duration 320
count 14
]
edge
[
source 1837
target 1916
duration 20
count 1
]
edge
[
source 1837
target 1524
duration 20
count 1
]
edge
[
source 1837
target 1525
duration 240
count 6
]
edge
[
source 1837
target 1911
duration 20
count 1
]
edge
[
source 1837
target 1528
duration 40
count 2
]
edge
[
source 1837
target 1532
duration 1020
count 31
]
edge
[
source 1838
target 1457
duration 20
count 1
]
edge
[
source 1838
target 1843
duration 100
count 4
]
edge
[
source 1838
target 1859
duration 100
count 5
]
edge
[
source 1838
target 1861
duration 1060
count 16
]
edge
[
source 1838
target 1503
duration 20
count 1
]
edge
[
source 1838
target 1890
duration 20
count 1
]
edge
[
source 1838
target 1887
duration 20
count 1
]
edge
[
source 1838
target 1902
duration 1420
count 21
]
edge
[
source 1838
target 1909
duration 2700
count 77
]
edge
[
source 1838
target 1911
duration 1040
count 27
]
edge
[
source 1838
target 1855
duration 20
count 1
]
edge
[
source 1838
target 1916
duration 40
count 2
]
edge
[
source 1843
target 1434
duration 20
count 1
]
edge
[
source 1843
target 1520
duration 20
count 1
]
edge
[
source 1843
target 1458
duration 20
count 1
]
edge
[
source 1843
target 1851
duration 60
count 3
]
edge
[
source 1843
target 1858
duration 20
count 1
]
edge
[
source 1843
target 1859
duration 640
count 27
]
edge
[
source 1843
target 1861
duration 60
count 3
]
edge
[
source 1843
target 1866
duration 20
count 1
]
edge
[
source 1843
target 1887
duration 40
count 2
]
edge
[
source 1843
target 1889
duration 1380
count 31
]
edge
[
source 1843
target 1898
duration 80
count 3
]
edge
[
source 1843
target 1902
duration 60
count 3
]
edge
[
source 1843
target 1907
duration 120
count 4
]
edge
[
source 1843
target 1909
duration 140
count 7
]
edge
[
source 1843
target 1911
duration 120
count 3
]
edge
[
source 1843
target 1912
duration 40
count 2
]
edge
[
source 1843
target 1855
duration 60
count 1
]
edge
[
source 1843
target 1916
duration 120
count 4
]
edge
[
source 1847
target 1888
duration 20
count 1
]
edge
[
source 1847
target 1434
duration 20
count 1
]
edge
[
source 1847
target 1439
duration 260
count 9
]
edge
[
source 1847
target 1443
duration 60
count 2
]
edge
[
source 1847
target 1866
duration 1080
count 33
]
edge
[
source 1847
target 1857
duration 240
count 10
]
edge
[
source 1847
target 1482
duration 20
count 1
]
edge
[
source 1847
target 1880
duration 240
count 6
]
edge
[
source 1847
target 1500
duration 820
count 20
]
edge
[
source 1847
target 1885
duration 60
count 3
]
edge
[
source 1847
target 1503
duration 300
count 11
]
edge
[
source 1847
target 1890
duration 40
count 1
]
edge
[
source 1847
target 1895
duration 20
count 1
]
edge
[
source 1847
target 1902
duration 20
count 1
]
edge
[
source 1847
target 1521
duration 20
count 1
]
edge
[
source 1847
target 1910
duration 60
count 2
]
edge
[
source 1847
target 1911
duration 60
count 2
]
edge
[
source 1847
target 1428
duration 20
count 1
]
edge
[
source 1847
target 1532
duration 80
count 3
]
edge
[
source 1847
target 1533
duration 60
count 2
]
edge
[
source 1851
target 1920
duration 20
count 1
]
edge
[
source 1851
target 1911
duration 120
count 4
]
edge
[
source 1851
target 1922
duration 20
count 1
]
edge
[
source 1851
target 1532
duration 60
count 1
]
edge
[
source 1851
target 1427
duration 20
count 1
]
edge
[
source 1851
target 1428
duration 20
count 1
]
edge
[
source 1851
target 1434
duration 20
count 1
]
edge
[
source 1851
target 1439
duration 40
count 1
]
edge
[
source 1851
target 1443
duration 20
count 1
]
edge
[
source 1851
target 1457
duration 20
count 1
]
edge
[
source 1851
target 1852
duration 60
count 2
]
edge
[
source 1851
target 1482
duration 20
count 1
]
edge
[
source 1851
target 1854
duration 240
count 9
]
edge
[
source 1851
target 1855
duration 1620
count 41
]
edge
[
source 1851
target 1858
duration 100
count 4
]
edge
[
source 1851
target 1859
duration 40
count 2
]
edge
[
source 1851
target 1861
duration 300
count 11
]
edge
[
source 1851
target 1863
duration 20
count 1
]
edge
[
source 1851
target 1866
duration 120
count 2
]
edge
[
source 1851
target 1872
duration 300
count 7
]
edge
[
source 1851
target 1877
duration 260
count 8
]
edge
[
source 1851
target 1883
duration 60
count 2
]
edge
[
source 1851
target 1887
duration 420
count 18
]
edge
[
source 1851
target 1889
duration 280
count 10
]
edge
[
source 1851
target 1890
duration 500
count 16
]
edge
[
source 1851
target 1897
duration 120
count 4
]
edge
[
source 1851
target 1898
duration 100
count 4
]
edge
[
source 1851
target 1902
duration 80
count 3
]
edge
[
source 1851
target 1907
duration 80
count 3
]
edge
[
source 1851
target 1909
duration 40
count 2
]
edge
[
source 1851
target 1912
duration 40
count 2
]
edge
[
source 1851
target 1916
duration 620
count 20
]
edge
[
source 1852
target 1922
duration 700
count 22
]
edge
[
source 1852
target 1427
duration 20
count 1
]
edge
[
source 1852
target 1912
duration 20
count 1
]
edge
[
source 1852
target 1521
duration 20
count 1
]
edge
[
source 1852
target 1855
duration 20
count 1
]
edge
[
source 1852
target 1861
duration 20
count 1
]
edge
[
source 1852
target 1863
duration 20
count 1
]
edge
[
source 1852
target 1902
duration 1280
count 31
]
edge
[
source 1852
target 1906
duration 240
count 7
]
edge
[
source 1852
target 1907
duration 220
count 10
]
edge
[
source 1852
target 1911
duration 760
count 20
]
edge
[
source 1852
target 1913
duration 340
count 9
]
edge
[
source 1852
target 1916
duration 1120
count 33
]
edge
[
source 1852
target 1917
duration 620
count 17
]
edge
[
source 1852
target 1919
duration 780
count 19
]
edge
[
source 1854
target 1872
duration 20
count 1
]
edge
[
source 1854
target 1855
duration 100
count 4
]
edge
[
source 1854
target 1858
duration 20
count 1
]
edge
[
source 1854
target 1861
duration 100
count 5
]
edge
[
source 1854
target 1883
duration 20
count 1
]
edge
[
source 1854
target 1887
duration 140
count 6
]
edge
[
source 1854
target 1889
duration 300
count 13
]
edge
[
source 1854
target 1890
duration 120
count 5
]
edge
[
source 1854
target 1897
duration 80
count 2
]
edge
[
source 1854
target 1898
duration 20
count 1
]
edge
[
source 1854
target 1877
duration 260
count 7
]
edge
[
source 1855
target 1858
duration 60
count 2
]
edge
[
source 1855
target 1457
duration 20
count 1
]
edge
[
source 1855
target 1859
duration 20
count 1
]
edge
[
source 1855
target 1861
duration 80
count 4
]
edge
[
source 1855
target 1863
duration 80
count 4
]
edge
[
source 1855
target 1872
duration 860
count 26
]
edge
[
source 1855
target 1883
duration 460
count 19
]
edge
[
source 1855
target 1887
duration 120
count 6
]
edge
[
source 1855
target 1889
duration 80
count 4
]
edge
[
source 1855
target 1890
duration 1300
count 33
]
edge
[
source 1855
target 1897
duration 180
count 4
]
edge
[
source 1855
target 1898
duration 80
count 4
]
edge
[
source 1855
target 1902
duration 40
count 2
]
edge
[
source 1855
target 1907
duration 80
count 4
]
edge
[
source 1855
target 1909
duration 60
count 3
]
edge
[
source 1855
target 1911
duration 140
count 4
]
edge
[
source 1855
target 1916
duration 960
count 29
]
edge
[
source 1855
target 1877
duration 20
count 1
]
edge
[
source 1857
target 1434
duration 20
count 1
]
edge
[
source 1857
target 1443
duration 40
count 2
]
edge
[
source 1857
target 1437
duration 60
count 1
]
edge
[
source 1857
target 1458
duration 60
count 3
]
edge
[
source 1857
target 1465
duration 20
count 1
]
edge
[
source 1857
target 1480
duration 40
count 1
]
edge
[
source 1857
target 1865
duration 60
count 2
]
edge
[
source 1857
target 1866
duration 1160
count 30
]
edge
[
source 1857
target 1880
duration 100
count 5
]
edge
[
source 1857
target 1500
duration 220
count 8
]
edge
[
source 1857
target 1885
duration 80
count 2
]
edge
[
source 1857
target 1503
duration 320
count 10
]
edge
[
source 1857
target 1895
duration 1320
count 33
]
edge
[
source 1857
target 1521
duration 160
count 8
]
edge
[
source 1857
target 1910
duration 280
count 6
]
edge
[
source 1857
target 1428
duration 40
count 2
]
edge
[
source 1858
target 1922
duration 140
count 7
]
edge
[
source 1858
target 1889
duration 20
count 1
]
edge
[
source 1858
target 1861
duration 700
count 21
]
edge
[
source 1858
target 1863
duration 40
count 2
]
edge
[
source 1858
target 1872
duration 140
count 6
]
edge
[
source 1858
target 1877
duration 80
count 4
]
edge
[
source 1858
target 1883
duration 20
count 1
]
edge
[
source 1858
target 1887
duration 200
count 9
]
edge
[
source 1858
target 1890
duration 340
count 11
]
edge
[
source 1858
target 1897
duration 20
count 1
]
edge
[
source 1858
target 1898
duration 700
count 28
]
edge
[
source 1858
target 1907
duration 2240
count 39
]
edge
[
source 1858
target 1912
duration 20
count 1
]
edge
[
source 1858
target 1916
duration 20
count 1
]
edge
[
source 1859
target 1922
duration 20
count 1
]
edge
[
source 1859
target 1909
duration 60
count 3
]
edge
[
source 1859
target 1493
duration 20
count 1
]
edge
[
source 1859
target 1495
duration 20
count 1
]
edge
[
source 1859
target 1498
duration 20
count 1
]
edge
[
source 1859
target 1887
duration 620
count 17
]
edge
[
source 1859
target 1890
duration 20
count 1
]
edge
[
source 1859
target 1898
duration 20
count 1
]
edge
[
source 1859
target 1902
duration 20
count 1
]
edge
[
source 1859
target 1911
duration 120
count 5
]
edge
[
source 1859
target 1916
duration 20
count 1
]
edge
[
source 1861
target 1920
duration 40
count 1
]
edge
[
source 1861
target 1911
duration 1920
count 22
]
edge
[
source 1861
target 1922
duration 660
count 20
]
edge
[
source 1861
target 1465
duration 20
count 1
]
edge
[
source 1861
target 1872
duration 220
count 6
]
edge
[
source 1861
target 1883
duration 20
count 1
]
edge
[
source 1861
target 1887
duration 260
count 10
]
edge
[
source 1861
target 1889
duration 680
count 17
]
edge
[
source 1861
target 1890
duration 420
count 10
]
edge
[
source 1861
target 1897
duration 140
count 3
]
edge
[
source 1861
target 1898
duration 160
count 7
]
edge
[
source 1861
target 1902
duration 1000
count 21
]
edge
[
source 1861
target 1907
duration 100
count 3
]
edge
[
source 1861
target 1916
duration 120
count 5
]
edge
[
source 1861
target 1877
duration 60
count 3
]
edge
[
source 1863
target 1872
duration 20
count 1
]
edge
[
source 1863
target 1877
duration 80
count 3
]
edge
[
source 1863
target 1883
duration 440
count 14
]
edge
[
source 1863
target 1887
duration 20
count 1
]
edge
[
source 1863
target 1889
duration 20
count 1
]
edge
[
source 1863
target 1890
duration 60
count 3
]
edge
[
source 1863
target 1897
duration 140
count 2
]
edge
[
source 1863
target 1898
duration 40
count 1
]
edge
[
source 1865
target 1888
duration 260
count 10
]
edge
[
source 1865
target 1866
duration 280
count 12
]
edge
[
source 1865
target 1521
duration 60
count 3
]
edge
[
source 1865
target 1895
duration 40
count 2
]
edge
[
source 1865
target 1880
duration 200
count 10
]
edge
[
source 1866
target 1888
duration 220
count 6
]
edge
[
source 1866
target 1439
duration 560
count 16
]
edge
[
source 1866
target 1443
duration 60
count 2
]
edge
[
source 1866
target 1437
duration 20
count 1
]
edge
[
source 1866
target 1458
duration 20
count 1
]
edge
[
source 1866
target 1465
duration 60
count 2
]
edge
[
source 1866
target 1468
duration 20
count 1
]
edge
[
source 1866
target 1480
duration 40
count 2
]
edge
[
source 1866
target 1483
duration 20
count 1
]
edge
[
source 1866
target 1880
duration 40
count 2
]
edge
[
source 1866
target 1498
duration 60
count 3
]
edge
[
source 1866
target 1452
duration 20
count 1
]
edge
[
source 1866
target 1500
duration 160
count 6
]
edge
[
source 1866
target 1885
duration 20
count 1
]
edge
[
source 1866
target 1503
duration 320
count 11
]
edge
[
source 1866
target 1890
duration 80
count 2
]
edge
[
source 1866
target 1895
duration 120
count 5
]
edge
[
source 1866
target 1521
duration 40
count 2
]
edge
[
source 1866
target 1907
duration 20
count 1
]
edge
[
source 1866
target 1910
duration 80
count 4
]
edge
[
source 1866
target 1532
duration 60
count 3
]
edge
[
source 1866
target 1533
duration 60
count 2
]
edge
[
source 1872
target 1877
duration 1580
count 63
]
edge
[
source 1872
target 1883
duration 100
count 4
]
edge
[
source 1872
target 1887
duration 120
count 5
]
edge
[
source 1872
target 1889
duration 20
count 1
]
edge
[
source 1872
target 1890
duration 620
count 21
]
edge
[
source 1872
target 1897
duration 40
count 2
]
edge
[
source 1872
target 1898
duration 260
count 12
]
edge
[
source 1877
target 1883
duration 120
count 6
]
edge
[
source 1877
target 1887
duration 120
count 5
]
edge
[
source 1877
target 1889
duration 100
count 4
]
edge
[
source 1877
target 1890
duration 1500
count 44
]
edge
[
source 1877
target 1897
duration 80
count 3
]
edge
[
source 1877
target 1898
duration 120
count 6
]
edge
[
source 1880
target 1888
duration 100
count 3
]
edge
[
source 1880
target 1885
duration 40
count 2
]
edge
[
source 1880
target 1895
duration 840
count 23
]
edge
[
source 1880
target 1521
duration 80
count 4
]
edge
[
source 1880
target 1439
duration 20
count 1
]
edge
[
source 1883
target 1889
duration 40
count 2
]
edge
[
source 1883
target 1890
duration 100
count 5
]
edge
[
source 1883
target 1897
duration 1240
count 37
]
edge
[
source 1883
target 1898
duration 20
count 1
]
edge
[
source 1885
target 1437
duration 20
count 1
]
edge
[
source 1885
target 1434
duration 2300
count 42
]
edge
[
source 1885
target 1465
duration 40
count 2
]
edge
[
source 1885
target 1475
duration 40
count 2
]
edge
[
source 1885
target 1480
duration 120
count 3
]
edge
[
source 1885
target 1482
duration 40
count 1
]
edge
[
source 1885
target 1443
duration 40
count 1
]
edge
[
source 1885
target 1493
duration 20
count 1
]
edge
[
source 1885
target 1500
duration 20
count 1
]
edge
[
source 1885
target 1501
duration 40
count 2
]
edge
[
source 1885
target 1888
duration 80
count 3
]
edge
[
source 1885
target 1895
duration 60
count 3
]
edge
[
source 1885
target 1521
duration 100
count 5
]
edge
[
source 1885
target 1910
duration 1060
count 25
]
edge
[
source 1885
target 1532
duration 60
count 2
]
edge
[
source 1885
target 1533
duration 1000
count 26
]
edge
[
source 1887
target 1920
duration 20
count 1
]
edge
[
source 1887
target 1922
duration 20
count 1
]
edge
[
source 1887
target 1443
duration 20
count 1
]
edge
[
source 1887
target 1468
duration 20
count 1
]
edge
[
source 1887
target 1907
duration 20
count 1
]
edge
[
source 1887
target 1500
duration 20
count 1
]
edge
[
source 1887
target 1502
duration 20
count 1
]
edge
[
source 1887
target 1889
duration 640
count 21
]
edge
[
source 1887
target 1890
duration 520
count 19
]
edge
[
source 1887
target 1895
duration 20
count 1
]
edge
[
source 1887
target 1897
duration 60
count 3
]
edge
[
source 1887
target 1898
duration 160
count 5
]
edge
[
source 1887
target 1902
duration 40
count 2
]
edge
[
source 1887
target 1909
duration 20
count 1
]
edge
[
source 1887
target 1911
duration 360
count 14
]
edge
[
source 1887
target 1916
duration 20
count 1
]
edge
[
source 1888
target 1521
duration 120
count 5
]
edge
[
source 1888
target 1910
duration 240
count 9
]
edge
[
source 1889
target 1920
duration 20
count 1
]
edge
[
source 1889
target 1922
duration 860
count 9
]
edge
[
source 1889
target 1457
duration 20
count 1
]
edge
[
source 1889
target 1890
duration 280
count 9
]
edge
[
source 1889
target 1897
duration 80
count 3
]
edge
[
source 1889
target 1898
duration 340
count 10
]
edge
[
source 1889
target 1902
duration 20
count 1
]
edge
[
source 1889
target 1907
duration 120
count 4
]
edge
[
source 1889
target 1911
duration 40
count 2
]
edge
[
source 1889
target 1916
duration 220
count 4
]
edge
[
source 1890
target 1911
duration 640
count 9
]
edge
[
source 1890
target 1922
duration 40
count 2
]
edge
[
source 1890
target 1437
duration 20
count 1
]
edge
[
source 1890
target 1458
duration 20
count 1
]
edge
[
source 1890
target 1439
duration 60
count 1
]
edge
[
source 1890
target 1452
duration 20
count 1
]
edge
[
source 1890
target 1443
duration 20
count 1
]
edge
[
source 1890
target 1503
duration 40
count 1
]
edge
[
source 1890
target 1501
duration 20
count 1
]
edge
[
source 1890
target 1897
duration 160
count 7
]
edge
[
source 1890
target 1898
duration 2220
count 70
]
edge
[
source 1890
target 1902
duration 40
count 2
]
edge
[
source 1890
target 1916
duration 1000
count 21
]
edge
[
source 1890
target 1907
duration 40
count 2
]
edge
[
source 1890
target 1909
duration 20
count 1
]
edge
[
source 1890
target 1912
duration 40
count 1
]
edge
[
source 1890
target 1532
duration 20
count 1
]
edge
[
source 1895
target 1426
duration 20
count 1
]
edge
[
source 1895
target 1443
duration 20
count 1
]
edge
[
source 1895
target 1458
duration 20
count 1
]
edge
[
source 1895
target 1434
duration 60
count 3
]
edge
[
source 1895
target 1480
duration 60
count 2
]
edge
[
source 1895
target 1493
duration 40
count 2
]
edge
[
source 1895
target 1503
duration 100
count 4
]
edge
[
source 1895
target 1500
duration 360
count 13
]
edge
[
source 1895
target 1520
duration 20
count 1
]
edge
[
source 1895
target 1521
duration 140
count 5
]
edge
[
source 1895
target 1910
duration 180
count 6
]
edge
[
source 1895
target 1532
duration 20
count 1
]
edge
[
source 1895
target 1533
duration 20
count 1
]
edge
[
source 1897
target 1898
duration 60
count 3
]
edge
[
source 1898
target 1922
duration 120
count 4
]
edge
[
source 1898
target 1911
duration 20
count 1
]
edge
[
source 1898
target 1458
duration 20
count 1
]
edge
[
source 1898
target 1920
duration 20
count 1
]
edge
[
source 1898
target 1907
duration 780
count 20
]
edge
[
source 1898
target 1909
duration 20
count 1
]
edge
[
source 1898
target 1912
duration 20
count 1
]
edge
[
source 1898
target 1916
duration 20
count 1
]
edge
[
source 1902
target 1922
duration 320
count 15
]
edge
[
source 1902
target 1426
duration 20
count 1
]
edge
[
source 1902
target 1477
duration 20
count 1
]
edge
[
source 1902
target 1468
duration 20
count 1
]
edge
[
source 1902
target 1532
duration 20
count 1
]
edge
[
source 1902
target 1906
duration 280
count 11
]
edge
[
source 1902
target 1907
duration 420
count 16
]
edge
[
source 1902
target 1909
duration 40
count 2
]
edge
[
source 1902
target 1911
duration 2520
count 44
]
edge
[
source 1902
target 1913
duration 340
count 14
]
edge
[
source 1902
target 1916
duration 220
count 9
]
edge
[
source 1902
target 1917
duration 160
count 4
]
edge
[
source 1902
target 1919
duration 980
count 27
]
edge
[
source 1906
target 1922
duration 240
count 10
]
edge
[
source 1906
target 1457
duration 20
count 1
]
edge
[
source 1906
target 1493
duration 20
count 1
]
edge
[
source 1906
target 1907
duration 560
count 19
]
edge
[
source 1906
target 1911
duration 160
count 5
]
edge
[
source 1906
target 1913
duration 160
count 7
]
edge
[
source 1906
target 1916
duration 120
count 4
]
edge
[
source 1906
target 1917
duration 880
count 23
]
edge
[
source 1906
target 1919
duration 100
count 4
]
edge
[
source 1907
target 1922
duration 440
count 10
]
edge
[
source 1907
target 1468
duration 20
count 1
]
edge
[
source 1907
target 1493
duration 20
count 1
]
edge
[
source 1907
target 1495
duration 20
count 1
]
edge
[
source 1907
target 1912
duration 40
count 2
]
edge
[
source 1907
target 1532
duration 20
count 1
]
edge
[
source 1907
target 1908
duration 20
count 1
]
edge
[
source 1907
target 1911
duration 1120
count 31
]
edge
[
source 1907
target 1913
duration 200
count 8
]
edge
[
source 1907
target 1916
duration 640
count 19
]
edge
[
source 1907
target 1917
duration 440
count 16
]
edge
[
source 1907
target 1919
duration 260
count 8
]
edge
[
source 1908
target 1920
duration 40
count 2
]
edge
[
source 1908
target 1452
duration 20
count 1
]
edge
[
source 1908
target 1457
duration 20
count 1
]
edge
[
source 1908
target 1461
duration 20
count 1
]
edge
[
source 1908
target 1468
duration 20
count 1
]
edge
[
source 1908
target 1909
duration 20
count 1
]
edge
[
source 1908
target 1503
duration 20
count 1
]
edge
[
source 1908
target 1520
duration 20
count 1
]
edge
[
source 1908
target 1912
duration 320
count 13
]
edge
[
source 1908
target 1913
duration 20
count 1
]
edge
[
source 1909
target 1503
duration 20
count 1
]
edge
[
source 1909
target 1916
duration 40
count 2
]
edge
[
source 1910
target 1521
duration 60
count 2
]
edge
[
source 1911
target 1922
duration 340
count 13
]
edge
[
source 1911
target 1437
duration 20
count 1
]
edge
[
source 1911
target 1913
duration 440
count 13
]
edge
[
source 1911
target 1916
duration 1280
count 42
]
edge
[
source 1911
target 1917
duration 340
count 12
]
edge
[
source 1911
target 1919
duration 400
count 17
]
edge
[
source 1912
target 1920
duration 40
count 2
]
edge
[
source 1912
target 1426
duration 20
count 1
]
edge
[
source 1912
target 1428
duration 20
count 1
]
edge
[
source 1912
target 1434
duration 420
count 14
]
edge
[
source 1912
target 1437
duration 20
count 1
]
edge
[
source 1912
target 1457
duration 60
count 2
]
edge
[
source 1912
target 1458
duration 20
count 1
]
edge
[
source 1912
target 1477
duration 40
count 1
]
edge
[
source 1912
target 1482
duration 100
count 1
]
edge
[
source 1912
target 1451
duration 20
count 1
]
edge
[
source 1912
target 1439
duration 40
count 2
]
edge
[
source 1912
target 1493
duration 20
count 1
]
edge
[
source 1912
target 1498
duration 20
count 1
]
edge
[
source 1912
target 1533
duration 1380
count 31
]
edge
[
source 1912
target 1500
duration 40
count 2
]
edge
[
source 1912
target 1503
duration 60
count 2
]
edge
[
source 1912
target 1916
duration 60
count 1
]
edge
[
source 1912
target 1922
duration 20
count 1
]
edge
[
source 1912
target 1532
duration 160
count 5
]
edge
[
source 1913
target 1922
duration 1080
count 35
]
edge
[
source 1913
target 1453
duration 20
count 1
]
edge
[
source 1913
target 1457
duration 60
count 3
]
edge
[
source 1913
target 1458
duration 20
count 1
]
edge
[
source 1913
target 1477
duration 20
count 1
]
edge
[
source 1913
target 1479
duration 20
count 1
]
edge
[
source 1913
target 1916
duration 80
count 4
]
edge
[
source 1913
target 1917
duration 160
count 3
]
edge
[
source 1913
target 1919
duration 580
count 18
]
edge
[
source 1916
target 1920
duration 20
count 1
]
edge
[
source 1916
target 1922
duration 460
count 19
]
edge
[
source 1916
target 1482
duration 20
count 1
]
edge
[
source 1916
target 1503
duration 20
count 1
]
edge
[
source 1916
target 1917
duration 100
count 5
]
edge
[
source 1916
target 1919
duration 220
count 6
]
edge
[
source 1917
target 1922
duration 400
count 10
]
edge
[
source 1917
target 1503
duration 20
count 1
]
edge
[
source 1917
target 1919
duration 160
count 8
]
edge
[
source 1919
target 1922
duration 160
count 6
]
edge
[
source 1920
target 1922
duration 20
count 1
]
edge
[
source 1920
target 1498
duration 20
count 1
]
edge
[
source 1922
target 1451
duration 20
count 1
]
edge
[
source 1922
target 1458
duration 40
count 2
]
edge
[
source 1922
target 1477
duration 20
count 1
]
edge
[
source 1922
target 1495
duration 20
count 1
]
edge
[
source 1922
target 1498
duration 20
count 1
]
edge
[
source 1922
target 1452
duration 20
count 1
]
edge
[
source 1426
target 1427
duration 220
count 9
]
edge
[
source 1426
target 1428
duration 260
count 11
]
edge
[
source 1426
target 1429
duration 100
count 4
]
edge
[
source 1426
target 1431
duration 780
count 27
]
edge
[
source 1426
target 1434
duration 100
count 5
]
edge
[
source 1426
target 1437
duration 140
count 7
]
edge
[
source 1426
target 1439
duration 300
count 11
]
edge
[
source 1426
target 1441
duration 120
count 4
]
edge
[
source 1426
target 1443
duration 180
count 9
]
edge
[
source 1426
target 1457
duration 40
count 2
]
edge
[
source 1426
target 1458
duration 40
count 2
]
edge
[
source 1426
target 1465
duration 160
count 6
]
edge
[
source 1426
target 1468
duration 960
count 36
]
edge
[
source 1426
target 1471
duration 80
count 4
]
edge
[
source 1426
target 1475
duration 100
count 5
]
edge
[
source 1426
target 1477
duration 40
count 2
]
edge
[
source 1426
target 1480
duration 180
count 9
]
edge
[
source 1426
target 1482
duration 140
count 6
]
edge
[
source 1426
target 1483
duration 60
count 1
]
edge
[
source 1426
target 1486
duration 2360
count 49
]
edge
[
source 1426
target 1489
duration 60
count 2
]
edge
[
source 1426
target 1498
duration 60
count 3
]
edge
[
source 1426
target 1452
duration 60
count 2
]
edge
[
source 1426
target 1435
duration 100
count 4
]
edge
[
source 1426
target 1501
duration 20
count 1
]
edge
[
source 1426
target 1520
duration 160
count 5
]
edge
[
source 1426
target 1533
duration 20
count 1
]
edge
[
source 1427
target 1428
duration 80
count 4
]
edge
[
source 1427
target 1429
duration 580
count 15
]
edge
[
source 1427
target 1431
duration 500
count 17
]
edge
[
source 1427
target 1434
duration 140
count 4
]
edge
[
source 1427
target 1435
duration 80
count 4
]
edge
[
source 1427
target 1437
duration 500
count 23
]
edge
[
source 1427
target 1439
duration 100
count 4
]
edge
[
source 1427
target 1441
duration 60
count 3
]
edge
[
source 1427
target 1443
duration 700
count 24
]
edge
[
source 1427
target 1451
duration 20
count 1
]
edge
[
source 1427
target 1465
duration 1060
count 30
]
edge
[
source 1427
target 1471
duration 80
count 4
]
edge
[
source 1427
target 1475
duration 100
count 4
]
edge
[
source 1427
target 1479
duration 20
count 1
]
edge
[
source 1427
target 1480
duration 100
count 4
]
edge
[
source 1427
target 1482
duration 140
count 6
]
edge
[
source 1427
target 1486
duration 160
count 7
]
edge
[
source 1427
target 1489
duration 20
count 1
]
edge
[
source 1428
target 1429
duration 120
count 5
]
edge
[
source 1428
target 1431
duration 280
count 8
]
edge
[
source 1428
target 1434
duration 40
count 2
]
edge
[
source 1428
target 1435
duration 20
count 1
]
edge
[
source 1428
target 1437
duration 300
count 14
]
edge
[
source 1428
target 1439
duration 180
count 9
]
edge
[
source 1428
target 1443
duration 40
count 2
]
edge
[
source 1428
target 1457
duration 320
count 15
]
edge
[
source 1428
target 1458
duration 80
count 4
]
edge
[
source 1428
target 1465
duration 160
count 6
]
edge
[
source 1428
target 1468
duration 60
count 3
]
edge
[
source 1428
target 1475
duration 20
count 1
]
edge
[
source 1428
target 1477
duration 20
count 1
]
edge
[
source 1428
target 1441
duration 80
count 2
]
edge
[
source 1428
target 1480
duration 180
count 6
]
edge
[
source 1428
target 1482
duration 100
count 5
]
edge
[
source 1428
target 1483
duration 160
count 8
]
edge
[
source 1428
target 1486
duration 820
count 15
]
edge
[
source 1428
target 1489
duration 120
count 6
]
edge
[
source 1428
target 1493
duration 40
count 2
]
edge
[
source 1428
target 1498
duration 540
count 21
]
edge
[
source 1428
target 1501
duration 20
count 1
]
edge
[
source 1428
target 1520
duration 220
count 7
]
edge
[
source 1428
target 1500
duration 20
count 1
]
edge
[
source 1428
target 1533
duration 20
count 1
]
edge
[
source 1429
target 1431
duration 380
count 15
]
edge
[
source 1429
target 1434
duration 80
count 4
]
edge
[
source 1429
target 1437
duration 240
count 9
]
edge
[
source 1429
target 1439
duration 40
count 2
]
edge
[
source 1429
target 1441
duration 40
count 2
]
edge
[
source 1429
target 1443
duration 300
count 10
]
edge
[
source 1429
target 1451
duration 20
count 1
]
edge
[
source 1429
target 1465
duration 640
count 22
]
edge
[
source 1429
target 1471
duration 120
count 6
]
edge
[
source 1429
target 1475
duration 160
count 6
]
edge
[
source 1429
target 1480
duration 40
count 2
]
edge
[
source 1429
target 1482
duration 280
count 11
]
edge
[
source 1429
target 1486
duration 80
count 4
]
edge
[
source 1429
target 1489
duration 3600
count 91
]
edge
[
source 1429
target 1435
duration 60
count 3
]
edge
[
source 1431
target 1434
duration 100
count 3
]
edge
[
source 1431
target 1437
duration 240
count 11
]
edge
[
source 1431
target 1439
duration 200
count 9
]
edge
[
source 1431
target 1441
duration 20
count 1
]
edge
[
source 1431
target 1443
duration 300
count 11
]
edge
[
source 1431
target 1465
duration 900
count 27
]
edge
[
source 1431
target 1471
duration 80
count 4
]
edge
[
source 1431
target 1475
duration 80
count 4
]
edge
[
source 1431
target 1480
duration 1300
count 18
]
edge
[
source 1431
target 1482
duration 260
count 12
]
edge
[
source 1431
target 1486
duration 200
count 8
]
edge
[
source 1431
target 1489
duration 320
count 11
]
edge
[
source 1431
target 1435
duration 240
count 8
]
edge
[
source 1434
target 1501
duration 20
count 1
]
edge
[
source 1434
target 1439
duration 60
count 3
]
edge
[
source 1434
target 1443
duration 340
count 13
]
edge
[
source 1434
target 1500
duration 60
count 3
]
edge
[
source 1434
target 1437
duration 120
count 6
]
edge
[
source 1434
target 1475
duration 1500
count 43
]
edge
[
source 1434
target 1477
duration 40
count 2
]
edge
[
source 1434
target 1480
duration 420
count 12
]
edge
[
source 1434
target 1486
duration 20
count 1
]
edge
[
source 1434
target 1489
duration 160
count 2
]
edge
[
source 1434
target 1435
duration 20
count 1
]
edge
[
source 1434
target 1502
duration 20
count 1
]
edge
[
source 1434
target 1532
duration 140
count 4
]
edge
[
source 1434
target 1533
duration 2560
count 54
]
edge
[
source 1435
target 1437
duration 60
count 3
]
edge
[
source 1435
target 1439
duration 60
count 3
]
edge
[
source 1435
target 1441
duration 100
count 5
]
edge
[
source 1435
target 1443
duration 260
count 12
]
edge
[
source 1435
target 1465
duration 80
count 4
]
edge
[
source 1435
target 1471
duration 540
count 16
]
edge
[
source 1435
target 1475
duration 40
count 2
]
edge
[
source 1435
target 1480
duration 40
count 2
]
edge
[
source 1435
target 1482
duration 120
count 4
]
edge
[
source 1435
target 1486
duration 100
count 5
]
edge
[
source 1435
target 1489
duration 20
count 1
]
edge
[
source 1437
target 1501
duration 40
count 2
]
edge
[
source 1437
target 1439
duration 320
count 16
]
edge
[
source 1437
target 1441
duration 40
count 2
]
edge
[
source 1437
target 1443
duration 620
count 23
]
edge
[
source 1437
target 1457
duration 1720
count 42
]
edge
[
source 1437
target 1452
duration 40
count 2
]
edge
[
source 1437
target 1458
duration 40
count 2
]
edge
[
source 1437
target 1465
duration 2440
count 71
]
edge
[
source 1437
target 1468
duration 20
count 1
]
edge
[
source 1437
target 1471
duration 240
count 10
]
edge
[
source 1437
target 1475
duration 300
count 11
]
edge
[
source 1437
target 1477
duration 40
count 2
]
edge
[
source 1437
target 1480
duration 260
count 12
]
edge
[
source 1437
target 1482
duration 260
count 9
]
edge
[
source 1437
target 1483
duration 140
count 6
]
edge
[
source 1437
target 1486
duration 80
count 4
]
edge
[
source 1437
target 1489
duration 220
count 10
]
edge
[
source 1437
target 1498
duration 200
count 10
]
edge
[
source 1437
target 1503
duration 160
count 6
]
edge
[
source 1437
target 1520
duration 40
count 2
]
edge
[
source 1437
target 1532
duration 20
count 1
]
edge
[
source 1437
target 1533
duration 40
count 2
]
edge
[
source 1437
target 1493
duration 60
count 3
]
edge
[
source 1439
target 1441
duration 40
count 1
]
edge
[
source 1439
target 1443
duration 200
count 8
]
edge
[
source 1439
target 1465
duration 420
count 16
]
edge
[
source 1439
target 1471
duration 1300
count 41
]
edge
[
source 1439
target 1475
duration 160
count 5
]
edge
[
source 1439
target 1477
duration 80
count 3
]
edge
[
source 1439
target 1480
duration 980
count 27
]
edge
[
source 1439
target 1482
duration 120
count 6
]
edge
[
source 1439
target 1486
duration 80
count 4
]
edge
[
source 1439
target 1489
duration 20
count 1
]
edge
[
source 1439
target 1501
duration 20
count 1
]
edge
[
source 1439
target 1503
duration 360
count 10
]
edge
[
source 1439
target 1500
duration 60
count 2
]
edge
[
source 1439
target 1532
duration 60
count 3
]
edge
[
source 1439
target 1533
duration 40
count 1
]
edge
[
source 1441
target 1475
duration 20
count 1
]
edge
[
source 1441
target 1489
duration 20
count 1
]
edge
[
source 1441
target 1482
duration 1340
count 44
]
edge
[
source 1441
target 1443
duration 20
count 1
]
edge
[
source 1441
target 1486
duration 680
count 21
]
edge
[
source 1443
target 1451
duration 60
count 3
]
edge
[
source 1443
target 1501
duration 160
count 6
]
edge
[
source 1443
target 1495
duration 20
count 1
]
edge
[
source 1443
target 1457
duration 120
count 5
]
edge
[
source 1443
target 1458
duration 40
count 2
]
edge
[
source 1443
target 1461
duration 20
count 1
]
edge
[
source 1443
target 1465
duration 2700
count 32
]
edge
[
source 1443
target 1503
duration 40
count 2
]
edge
[
source 1443
target 1468
duration 20
count 1
]
edge
[
source 1443
target 1471
duration 40
count 2
]
edge
[
source 1443
target 1475
duration 500
count 18
]
edge
[
source 1443
target 1480
duration 2480
count 25
]
edge
[
source 1443
target 1482
duration 160
count 7
]
edge
[
source 1443
target 1486
duration 80
count 3
]
edge
[
source 1443
target 1489
duration 80
count 4
]
edge
[
source 1443
target 1493
duration 120
count 2
]
edge
[
source 1443
target 1502
duration 40
count 2
]
edge
[
source 1443
target 1520
duration 60
count 1
]
edge
[
source 1443
target 1532
duration 80
count 3
]
edge
[
source 1443
target 1533
duration 100
count 5
]
edge
[
source 1451
target 1453
duration 60
count 3
]
edge
[
source 1451
target 1452
duration 440
count 18
]
edge
[
source 1451
target 1457
duration 360
count 12
]
edge
[
source 1451
target 1458
duration 60
count 3
]
edge
[
source 1451
target 1459
duration 60
count 3
]
edge
[
source 1451
target 1461
duration 220
count 6
]
edge
[
source 1451
target 1468
duration 220
count 8
]
edge
[
source 1451
target 1477
duration 100
count 4
]
edge
[
source 1451
target 1479
duration 100
count 4
]
edge
[
source 1451
target 1483
duration 20
count 1
]
edge
[
source 1451
target 1493
duration 460
count 19
]
edge
[
source 1451
target 1495
duration 260
count 8
]
edge
[
source 1451
target 1498
duration 120
count 6
]
edge
[
source 1451
target 1501
duration 140
count 7
]
edge
[
source 1451
target 1502
duration 240
count 8
]
edge
[
source 1451
target 1516
duration 80
count 3
]
edge
[
source 1451
target 1520
duration 1540
count 44
]
edge
[
source 1451
target 1522
duration 120
count 5
]
edge
[
source 1452
target 1495
duration 260
count 7
]
edge
[
source 1452
target 1453
duration 100
count 4
]
edge
[
source 1452
target 1457
duration 700
count 24
]
edge
[
source 1452
target 1458
duration 4020
count 80
]
edge
[
source 1452
target 1459
duration 280
count 9
]
edge
[
source 1452
target 1461
duration 420
count 10
]
edge
[
source 1452
target 1465
duration 40
count 2
]
edge
[
source 1452
target 1468
duration 1540
count 43
]
edge
[
source 1452
target 1477
duration 1680
count 51
]
edge
[
source 1452
target 1479
duration 300
count 11
]
edge
[
source 1452
target 1482
duration 300
count 12
]
edge
[
source 1452
target 1483
duration 200
count 5
]
edge
[
source 1452
target 1486
duration 360
count 13
]
edge
[
source 1452
target 1489
duration 20
count 1
]
edge
[
source 1452
target 1493
duration 160
count 7
]
edge
[
source 1452
target 1498
duration 600
count 16
]
edge
[
source 1452
target 1500
duration 20
count 1
]
edge
[
source 1452
target 1501
duration 200
count 9
]
edge
[
source 1452
target 1502
duration 120
count 5
]
edge
[
source 1452
target 1503
duration 20
count 1
]
edge
[
source 1452
target 1516
duration 60
count 3
]
edge
[
source 1452
target 1520
duration 360
count 16
]
edge
[
source 1452
target 1522
duration 820
count 25
]
edge
[
source 1452
target 1532
duration 180
count 5
]
edge
[
source 1453
target 1457
duration 760
count 22
]
edge
[
source 1453
target 1458
duration 320
count 16
]
edge
[
source 1453
target 1459
duration 140
count 6
]
edge
[
source 1453
target 1461
duration 800
count 22
]
edge
[
source 1453
target 1468
duration 360
count 10
]
edge
[
source 1453
target 1477
duration 600
count 13
]
edge
[
source 1453
target 1479
duration 80
count 2
]
edge
[
source 1453
target 1483
duration 60
count 3
]
edge
[
source 1453
target 1495
duration 180
count 6
]
edge
[
source 1453
target 1498
duration 80
count 3
]
edge
[
source 1453
target 1501
duration 680
count 25
]
edge
[
source 1453
target 1502
duration 120
count 5
]
edge
[
source 1453
target 1516
duration 100
count 4
]
edge
[
source 1453
target 1522
duration 60
count 3
]
edge
[
source 1457
target 1458
duration 420
count 16
]
edge
[
source 1457
target 1459
duration 440
count 14
]
edge
[
source 1457
target 1461
duration 860
count 12
]
edge
[
source 1457
target 1465
duration 140
count 6
]
edge
[
source 1457
target 1468
duration 600
count 22
]
edge
[
source 1457
target 1477
duration 160
count 5
]
edge
[
source 1457
target 1479
duration 140
count 6
]
edge
[
source 1457
target 1480
duration 80
count 4
]
edge
[
source 1457
target 1483
duration 260
count 13
]
edge
[
source 1457
target 1486
duration 80
count 4
]
edge
[
source 1457
target 1493
duration 460
count 13
]
edge
[
source 1457
target 1495
duration 160
count 7
]
edge
[
source 1457
target 1498
duration 2280
count 61
]
edge
[
source 1457
target 1501
duration 140
count 5
]
edge
[
source 1457
target 1502
duration 60
count 3
]
edge
[
source 1457
target 1503
duration 240
count 8
]
edge
[
source 1457
target 1489
duration 20
count 1
]
edge
[
source 1457
target 1516
duration 280
count 8
]
edge
[
source 1457
target 1520
duration 260
count 11
]
edge
[
source 1457
target 1522
duration 1600
count 53
]
edge
[
source 1457
target 1471
duration 20
count 1
]
edge
[
source 1457
target 1532
duration 20
count 1
]
edge
[
source 1457
target 1533
duration 60
count 3
]
edge
[
source 1458
target 1459
duration 120
count 6
]
edge
[
source 1458
target 1461
duration 1140
count 33
]
edge
[
source 1458
target 1465
duration 40
count 2
]
edge
[
source 1458
target 1468
duration 640
count 25
]
edge
[
source 1458
target 1477
duration 2220
count 65
]
edge
[
source 1458
target 1479
duration 640
count 20
]
edge
[
source 1458
target 1480
duration 40
count 2
]
edge
[
source 1458
target 1482
duration 780
count 21
]
edge
[
source 1458
target 1483
duration 100
count 5
]
edge
[
source 1458
target 1486
duration 540
count 22
]
edge
[
source 1458
target 1493
duration 600
count 24
]
edge
[
source 1458
target 1495
duration 620
count 18
]
edge
[
source 1458
target 1498
duration 460
count 16
]
edge
[
source 1458
target 1501
duration 420
count 15
]
edge
[
source 1458
target 1502
duration 400
count 16
]
edge
[
source 1458
target 1503
duration 40
count 2
]
edge
[
source 1458
target 1516
duration 720
count 29
]
edge
[
source 1458
target 1520
duration 300
count 11
]
edge
[
source 1458
target 1522
duration 240
count 11
]
edge
[
source 1458
target 1532
duration 380
count 10
]
edge
[
source 1458
target 1533
duration 100
count 5
]
edge
[
source 1459
target 1495
duration 240
count 9
]
edge
[
source 1459
target 1461
duration 40
count 2
]
edge
[
source 1459
target 1468
duration 360
count 6
]
edge
[
source 1459
target 1477
duration 260
count 11
]
edge
[
source 1459
target 1479
duration 300
count 11
]
edge
[
source 1459
target 1483
duration 480
count 16
]
edge
[
source 1459
target 1493
duration 180
count 9
]
edge
[
source 1459
target 1498
duration 1180
count 39
]
edge
[
source 1459
target 1501
duration 40
count 2
]
edge
[
source 1459
target 1502
duration 80
count 4
]
edge
[
source 1459
target 1516
duration 1400
count 29
]
edge
[
source 1459
target 1520
duration 80
count 3
]
edge
[
source 1459
target 1522
duration 660
count 19
]
edge
[
source 1461
target 1468
duration 120
count 5
]
edge
[
source 1461
target 1477
duration 300
count 8
]
edge
[
source 1461
target 1479
duration 220
count 8
]
edge
[
source 1461
target 1483
duration 20
count 1
]
edge
[
source 1461
target 1493
duration 300
count 7
]
edge
[
source 1461
target 1495
duration 560
count 12
]
edge
[
source 1461
target 1498
duration 40
count 2
]
edge
[
source 1461
target 1501
duration 1200
count 30
]
edge
[
source 1461
target 1502
duration 220
count 10
]
edge
[
source 1461
target 1503
duration 20
count 1
]
edge
[
source 1461
target 1516
duration 1000
count 27
]
edge
[
source 1461
target 1522
duration 20
count 1
]
edge
[
source 1465
target 1468
duration 20
count 1
]
edge
[
source 1465
target 1471
duration 100
count 4
]
edge
[
source 1465
target 1475
duration 60
count 2
]
edge
[
source 1465
target 1480
duration 3960
count 48
]
edge
[
source 1465
target 1482
duration 100
count 5
]
edge
[
source 1465
target 1486
duration 80
count 3
]
edge
[
source 1465
target 1489
duration 200
count 5
]
edge
[
source 1465
target 1498
duration 20
count 1
]
edge
[
source 1465
target 1477
duration 220
count 8
]
edge
[
source 1465
target 1532
duration 20
count 1
]
edge
[
source 1465
target 1533
duration 40
count 2
]
edge
[
source 1468
target 1503
duration 20
count 1
]
edge
[
source 1468
target 1477
duration 1420
count 40
]
edge
[
source 1468
target 1479
duration 40
count 2
]
edge
[
source 1468
target 1480
duration 20
count 1
]
edge
[
source 1468
target 1482
duration 20
count 1
]
edge
[
source 1468
target 1483
duration 300
count 9
]
edge
[
source 1468
target 1486
duration 200
count 7
]
edge
[
source 1468
target 1493
duration 500
count 13
]
edge
[
source 1468
target 1495
duration 120
count 6
]
edge
[
source 1468
target 1498
duration 260
count 13
]
edge
[
source 1468
target 1501
duration 260
count 6
]
edge
[
source 1468
target 1502
duration 140
count 6
]
edge
[
source 1468
target 1516
duration 600
count 18
]
edge
[
source 1468
target 1520
duration 540
count 20
]
edge
[
source 1468
target 1522
duration 320
count 13
]
edge
[
source 1471
target 1482
duration 160
count 7
]
edge
[
source 1471
target 1475
duration 20
count 1
]
edge
[
source 1471
target 1480
duration 100
count 5
]
edge
[
source 1471
target 1486
duration 260
count 11
]
edge
[
source 1471
target 1489
duration 20
count 1
]
edge
[
source 1475
target 1480
duration 540
count 8
]
edge
[
source 1475
target 1482
duration 20
count 1
]
edge
[
source 1475
target 1486
duration 100
count 3
]
edge
[
source 1475
target 1489
duration 360
count 11
]
edge
[
source 1477
target 1520
duration 900
count 31
]
edge
[
source 1477
target 1479
duration 460
count 18
]
edge
[
source 1477
target 1480
duration 320
count 10
]
edge
[
source 1477
target 1482
duration 220
count 9
]
edge
[
source 1477
target 1483
duration 20
count 1
]
edge
[
source 1477
target 1486
duration 160
count 7
]
edge
[
source 1477
target 1495
duration 200
count 9
]
edge
[
source 1477
target 1498
duration 400
count 9
]
edge
[
source 1477
target 1500
duration 20
count 1
]
edge
[
source 1477
target 1501
duration 680
count 22
]
edge
[
source 1477
target 1502
duration 540
count 19
]
edge
[
source 1477
target 1516
duration 140
count 5
]
edge
[
source 1477
target 1522
duration 360
count 16
]
edge
[
source 1477
target 1532
duration 20
count 1
]
edge
[
source 1477
target 1493
duration 240
count 10
]
edge
[
source 1479
target 1483
duration 100
count 4
]
edge
[
source 1479
target 1495
duration 640
count 20
]
edge
[
source 1479
target 1498
duration 340
count 10
]
edge
[
source 1479
target 1501
duration 180
count 8
]
edge
[
source 1479
target 1502
duration 60
count 3
]
edge
[
source 1479
target 1516
duration 560
count 22
]
edge
[
source 1479
target 1520
duration 180
count 8
]
edge
[
source 1479
target 1522
duration 180
count 8
]
edge
[
source 1480
target 1503
duration 80
count 2
]
edge
[
source 1480
target 1482
duration 120
count 5
]
edge
[
source 1480
target 1483
duration 20
count 1
]
edge
[
source 1480
target 1486
duration 320
count 9
]
edge
[
source 1480
target 1489
duration 340
count 12
]
edge
[
source 1480
target 1501
duration 20
count 1
]
edge
[
source 1480
target 1520
duration 40
count 2
]
edge
[
source 1482
target 1500
duration 40
count 2
]
edge
[
source 1482
target 1502
duration 20
count 1
]
edge
[
source 1482
target 1483
duration 180
count 8
]
edge
[
source 1482
target 1486
duration 780
count 33
]
edge
[
source 1482
target 1489
duration 140
count 6
]
edge
[
source 1482
target 1498
duration 360
count 8
]
edge
[
source 1482
target 1503
duration 20
count 1
]
edge
[
source 1482
target 1520
duration 220
count 6
]
edge
[
source 1482
target 1533
duration 20
count 1
]
edge
[
source 1483
target 1495
duration 120
count 4
]
edge
[
source 1483
target 1493
duration 160
count 7
]
edge
[
source 1483
target 1498
duration 360
count 15
]
edge
[
source 1483
target 1502
duration 100
count 4
]
edge
[
source 1483
target 1516
duration 220
count 8
]
edge
[
source 1483
target 1520
duration 220
count 6
]
edge
[
source 1483
target 1522
duration 60
count 3
]
edge
[
source 1486
target 1489
duration 80
count 4
]
edge
[
source 1486
target 1493
duration 20
count 1
]
edge
[
source 1486
target 1498
duration 20
count 1
]
edge
[
source 1486
target 1503
duration 20
count 1
]
edge
[
source 1486
target 1533
duration 20
count 1
]
edge
[
source 1489
target 1500
duration 20
count 1
]
edge
[
source 1489
target 1501
duration 20
count 1
]
edge
[
source 1489
target 1533
duration 20
count 1
]
edge
[
source 1493
target 1522
duration 140
count 5
]
edge
[
source 1493
target 1495
duration 280
count 11
]
edge
[
source 1493
target 1498
duration 120
count 5
]
edge
[
source 1493
target 1501
duration 2180
count 47
]
edge
[
source 1493
target 1502
duration 2260
count 59
]
edge
[
source 1493
target 1503
duration 20
count 1
]
edge
[
source 1493
target 1516
duration 160
count 6
]
edge
[
source 1493
target 1520
duration 240
count 11
]
edge
[
source 1493
target 1533
duration 20
count 1
]
edge
[
source 1495
target 1498
duration 140
count 6
]
edge
[
source 1495
target 1501
duration 100
count 5
]
edge
[
source 1495
target 1502
duration 160
count 7
]
edge
[
source 1495
target 1503
duration 20
count 1
]
edge
[
source 1495
target 1516
duration 200
count 10
]
edge
[
source 1495
target 1520
duration 1040
count 31
]
edge
[
source 1495
target 1522
duration 100
count 5
]
edge
[
source 1498
target 1500
duration 20
count 1
]
edge
[
source 1498
target 1501
duration 60
count 3
]
edge
[
source 1498
target 1502
duration 100
count 5
]
edge
[
source 1498
target 1503
duration 40
count 2
]
edge
[
source 1498
target 1516
duration 240
count 11
]
edge
[
source 1498
target 1520
duration 960
count 30
]
edge
[
source 1498
target 1522
duration 1200
count 27
]
edge
[
source 1498
target 1532
duration 20
count 1
]
edge
[
source 1498
target 1533
duration 20
count 1
]
edge
[
source 1500
target 1519
duration 60
count 3
]
edge
[
source 1500
target 1525
duration 100
count 4
]
edge
[
source 1500
target 1503
duration 200
count 7
]
edge
[
source 1500
target 1504
duration 80
count 3
]
edge
[
source 1500
target 1520
duration 20
count 1
]
edge
[
source 1500
target 1524
duration 40
count 2
]
edge
[
source 1500
target 1528
duration 80
count 4
]
edge
[
source 1500
target 1532
duration 500
count 19
]
edge
[
source 1500
target 1533
duration 340
count 12
]
edge
[
source 1501
target 1503
duration 20
count 1
]
edge
[
source 1501
target 1502
duration 2040
count 58
]
edge
[
source 1501
target 1516
duration 220
count 9
]
edge
[
source 1501
target 1520
duration 200
count 8
]
edge
[
source 1501
target 1522
duration 60
count 3
]
edge
[
source 1501
target 1532
duration 20
count 1
]
edge
[
source 1501
target 1533
duration 40
count 2
]
edge
[
source 1502
target 1516
duration 120
count 3
]
edge
[
source 1502
target 1520
duration 1100
count 41
]
edge
[
source 1502
target 1522
duration 100
count 5
]
edge
[
source 1502
target 1533
duration 20
count 1
]
edge
[
source 1503
target 1525
duration 160
count 4
]
edge
[
source 1503
target 1521
duration 20
count 1
]
edge
[
source 1503
target 1524
duration 1320
count 35
]
edge
[
source 1503
target 1528
duration 520
count 8
]
edge
[
source 1503
target 1532
duration 200
count 8
]
edge
[
source 1503
target 1533
duration 280
count 11
]
edge
[
source 1504
target 1525
duration 120
count 6
]
edge
[
source 1504
target 1519
duration 1700
count 32
]
edge
[
source 1504
target 1524
duration 20
count 1
]
edge
[
source 1504
target 1528
duration 100
count 5
]
edge
[
source 1504
target 1532
duration 220
count 8
]
edge
[
source 1504
target 1533
duration 160
count 6
]
edge
[
source 1516
target 1520
duration 160
count 4
]
edge
[
source 1516
target 1522
duration 620
count 18
]
edge
[
source 1519
target 1532
duration 20
count 1
]
edge
[
source 1519
target 1524
duration 20
count 1
]
edge
[
source 1519
target 1528
duration 40
count 2
]
edge
[
source 1519
target 1533
duration 60
count 2
]
edge
[
source 1520
target 1522
duration 180
count 6
]
edge
[
source 1521
target 1532
duration 20
count 1
]
edge
[
source 1524
target 1525
duration 200
count 7
]
edge
[
source 1524
target 1528
duration 140
count 3
]
edge
[
source 1524
target 1533
duration 20
count 1
]
edge
[
source 1525
target 1528
duration 260
count 9
]
edge
[
source 1525
target 1532
duration 40
count 2
]
edge
[
source 1525
target 1533
duration 100
count 4
]
edge
[
source 1528
target 1533
duration 160
count 6
]
edge
[
source 1528
target 1532
duration 40
count 2
]
edge
[
source 1532
target 1533
duration 1080
count 28
]
]
