# Supplementary material
Source: ML conference proceedings conference paper supplement (https://proceedings.neurips.cc/paper_files/paper/2021/hash/a5e308070bd6dd3cc56283f2313522de-Abstract.html)
Supplement: Supplementary file 1 [file a5e308070bd6dd3cc56283f2313522de-Supplemental.zip › Supplementary Materials/Numerical experiments/Simulations/Code/Missing Observations.R]

rm(list=objects())
setwd("~/Desktop/Experiments/Simulations/Results")
library(softImpute)
library(missSBM)
##################### -  Set parameters - #########
K <- 3
M <- 100 # number of experiments############
N <- 500
p_list <- exp(seq(log(1), log(0.025), length.out = 15))
# set Q the probabilities of connections between communities
Q <- matrix(c(0.5,   0.2,  0.2,
              0.2,   0.5,  0.2,
              0.2,  0.2,  0.5), nrow = 3)

alpha <- rep(1/K, K)

##################### -  Experiments - #####################
for (r in 1:14){
  p <- p_list[r]
  set.seed(0)
  start_time <- Sys.time()
  
  # record the errors 
  Error_missSBM <- rep(NA, M)
  Error_Var<- rep(0, M)
  Error_true_Z <- rep(NA, M)
  Error_softImpute <- rep(NA, M)
  Error_av <- rep(NA, M)
  results <- readRDS(paste0("Missing Observations", "/r_", r,".RDS"))
  for (m in 1:M){
    
    ##################### -  Draw random variables - #####################
    # set Z the label function
    Z <- base::sample(1:K, size = N, replace = T, prob = alpha)
    # set A the full adjacency matrix
    Theta <- sapply(1:N, function(i) sapply(1:N, function(j) Q[Z[i], Z[j]])) # SBM matrix
    diag(Theta)  <- 0
    A_undir <- rbinom(n=N*(N-1)/2, size=1, prob=Theta[upper.tri(Theta)]) # draw edges
    A <- matrix(0,N,N)
    A[upper.tri(A)] <- A_undir
    A <- (A+t(A)) # adjacency matrix
    
    # Sample edges
    Omega_undir <- rbinom(n=N*(N-1)/2, size=1, prob=p) # draw edges
    Omega <- matrix(0,N,N)
    Omega[upper.tri(Omega)] <- Omega_undir
    Omega <- (Omega+t(Omega)) # adjacency matrix
    
    # set A_obs the observed adjacency matrix
    A_obs <- A
    diag(A_obs) <- NA
    A_obs[Omega == 0] <- NA
    
    ##################### -  Estimate network using the average degree - #####################
    estimate_av <- matrix(mean(A_obs, na.rm =T), ncol = N, nrow = N)
    diag(estimate_av) <- 0
    Error_av[m] <- sum((Theta - estimate_av)**2, na.rm = F)/N**2

    ##################### -  Estimate network using softImpute - #####################
    SVD <- softImpute(A_obs, rank.max = K, lambda = 0, maxit = 500)
    estimate_Theta_softImpute <- SVD$u %*% diag(SVD$d, nrow = K, ncol = K) %*% t(SVD$v)
    estimate_Theta_softImpute <- pmin(pmax(estimate_Theta_softImpute, 0),1)
    Error_softImpute[m] <- sum((estimate_Theta_softImpute - Theta)**2, na.rm = F)/N**2

    ##################### -  Estimate network using missSBM - #####################
    estimator_missSBM <- missSBM::estimateMissSBM(
      adjacencyMatrix = A_obs,
      vBlocks = c(K),
      sampling = "dyad",
      control = list(trace = 0))$bestModel$fittedSBM
    estimate_Theta_missSBM <- estimator_missSBM$expectation

    Error_missSBM[m] <- sum((estimate_Theta_missSBM - Theta)**2, na.rm = F)/N**2

    ##################### -  Estimate network using the variational estimate of z - #####################
    z_est <- estimator_missSBM$memberships
    estimate_Q_Var <- sapply(1:K, function(a) sapply(1:K, function(b) mean(A_obs[z_est == a, z_est == b], na.rm =T)))
    estimate_Q_Var[is.na(estimate_Q_Var)] <- 0
    estimate_Theta_Var <- sapply(1:N, function(i) sapply(1:N, function(j) estimate_Q_Var[z_est[i], z_est[j]]))
    diag(estimate_Theta_Var) <- 0

    Error_Var[m] <- sum((estimate_Theta_Var - Theta)**2, na.rm = F)/N**2

    ##################### -  Estimate network using the true z - #####################
    estimate_Q_true_Z <- sapply(1:K, function(a) sapply(1:K, function(b) mean(A_obs[Z == a, Z == b], na.rm =T)))
    estimate_Q_true_Z[is.na(estimate_Q_true_Z)] <- 0
    estimate_Theta_true_Z <- sapply(1:N, function(i) sapply(1:N, function(j) estimate_Q_true_Z[Z[i], Z[j]]))
    diag(estimate_Theta_true_Z) <- 0

    Error_true_Z[m] <- sum((estimate_Theta_true_Z - Theta)**2, na.rm = F)/N**2
    print(m)
  }
  results$Error_av <- Error_av
  
  path <- paste0("Missing Observations", "/r_", r,"_av.RDS")
  saveRDS(results, file = path)
  
  print(path)
  end_time <- Sys.time()
  print(end_time - start_time)
}
